# Supplementary material for: Protein Homeostasis Imposes a Barrier on Functional Integration of Horizontally Transferred Genes in Bacteria
Source: PLoS Genet. 2015 Oct 20;11(10):e1005612. doi: 10.1371/journal.pgen.1005612 (PMC4618355; doi:10.1371/journal.pgen.1005612)
Supplement: S6 Table — (A) Relative abundance (B) log10 of relative abundance (C) z-scores of log10 of relative abundance. (XLSX) [file pgen.1005612.s012.xlsx]

## Sheet: Relative Abundance
S6 Table. Global proteome quantification by TMT LC-MS/MS
(A) Relative abundance
			WT	Upon HGT					Post-Evolution
UniProt Acc	Gene Name	Description	TMP 1.0 ug/mL	DHFR-22	DHFR-23	DHFR-35	DHFR-38	DHFR-39	DHFR-22	DHFR-23	DHFR-35	DHFR-38	DHFR-39
P0ABD5	accA	Acetyl-coenzyme A carboxylase carboxyl transferase subunit alpha OS=Escherichia coli (strain K12) GN=accA PE=1 SV=2 - [ACCA_ECOLI]	2.38509	0.794159	0.416625	0.792327	0.336749	0.655182	0.432302	1.56453	1.15201	1.32074	0.602644
P0ABD8	accB	Biotin carboxyl carrier protein of acetyl-CoA carboxylase OS=Escherichia coli (strain K12) GN=accB PE=1 SV=1 - [BCCP_ECOLI]	0.799277	0.911332	0.594013	1.03074	0.339529	0.700966	0.364527	1.8055	1.47811	1.75078	1.18367
P24182	accC	Biotin carboxylase OS=Escherichia coli (strain K12) GN=accC PE=1 SV=2 - [ACCC_ECOLI]	1.00728	0.786822	0.478795	0.93454	0.610709	0.665268	0.427453	1.33896	1.38292	1.31176	0.838987
P0A9Q5	accD	Acetyl-coenzyme A carboxylase carboxyl transferase subunit beta OS=Escherichia coli (strain K12) GN=accD PE=1 SV=1 - [ACCD_ECOLI]	0.853231	0.972142	0.553641	0.954405	0.368436	0.757309	0.57806	1.90359	1.72381	1.82749	0.91724
P0A9G6	aceA	Isocitrate lyase OS=Escherichia coli (strain K12) GN=aceA PE=1 SV=1 - [ACEA_ECOLI]	0.335518	0.845841	0.341161	0.523273	0.278967	0.754486	0.469045	0.691627	0.762505	0.643713	0.699259
P08997	aceB	Malate synthase A OS=Escherichia coli (strain K12) GN=aceB PE=1 SV=1 - [MASY_ECOLI]	0.551809	0.90322	0.332798	0.595016	0.42012	0.630027	0.371257	0.563187	0.698502	0.494071	0.502365
P0AFG8	aceE	Pyruvate dehydrogenase E1 component OS=Escherichia coli (strain K12) GN=aceE PE=1 SV=2 - [ODP1_ECOLI]	0.808906	0.843896	0.483949	0.986326	0.390767	0.807048	0.560717	2.0136	1.63476	1.90352	0.790977
P06959	aceF	Dihydrolipoyllysine-residue acetyltransferase component of pyruvate dehydrogenase complex OS=Escherichia coli (strain K12) GN=aceF PE=1 SV=3 - [ODP2_ECOLI]	1.70418	0.979759	0.915077	1.66873	0.666981	1.56833
P11071	aceK	Isocitrate dehydrogenase kinase/phosphatase OS=Escherichia coli (strain K12) GN=aceK PE=1 SV=2 - [ACEK_ECOLI]	1.24492
P0A6A3	ackA	Acetate kinase OS=Escherichia coli (strain K12) GN=ackA PE=1 SV=1 - [ACKA_ECOLI]	1.67915	0.97924	0.594343	1.76988	0.89089	1.00171	0.499837	1.72012	1.5737	1.63317	1.14915
P25516	acnA	Aconitate hydratase 1 OS=Escherichia coli (strain K12) GN=acnA PE=1 SV=3 - [ACON1_ECOLI]	1.53933	0.977068	0.461797	1.06482	0.755902	0.768789	0.382846	1.17004	1.08386	1.03994	0.666637
P36683	acnB	Aconitate hydratase 2 OS=Escherichia coli (strain K12) GN=acnB PE=1 SV=3 - [ACON2_ECOLI]	0.95381	0.845523	0.433232	0.877893	0.482799	0.901179	0.477186	1.30222	1.44776	1.28645	0.962587
P21515	acpH	Acyl carrier protein phosphodiesterase OS=Escherichia coli (strain K12) GN=acpH PE=3 SV=2 - [ACPH_ECOLI]	2.04693
P0A6A8	acpP	Acyl carrier protein OS=Escherichia coli (strain K12) GN=acpP PE=1 SV=2 - [ACP_ECOLI]	1.04497	1.1447	0.677454	1.27076	0.310968	0.55983	0.994827	1.85168	1.23666	2.36491	1.42136
P24224	acpS	Holo-[acyl-carrier-protein] synthase OS=Escherichia coli (strain K12) GN=acpS PE=1 SV=3 - [ACPS_ECOLI]	1.08631	1.086	0.53873	1.31473	0.636377	0.821548
P0AE06	acrA	Acriflavine resistance protein A OS=Escherichia coli (strain K12) GN=acrA PE=1 SV=1 - [ACRA_ECOLI]	1.13198	0.970792	0.458925	0.766003	0.373299	0.463808	0.836647	0.548806	0.70034	0.755358	0.301271
P31224	acrB	Acriflavine resistance protein B OS=Escherichia coli (strain K12) GN=acrB PE=1 SV=1 - [ACRB_ECOLI]	1.18484	0.731613	0.34591	0.774967	0.310027	0.520595
P24177	acrD	Probable aminoglycoside efflux pump OS=Escherichia coli (strain K12) GN=acrD PE=3 SV=3 - [ACRD_ECOLI]	0.566318
P0ACS9	acrR	HTH-type transcriptional regulator AcrR OS=Escherichia coli (strain K12) GN=acrR PE=1 SV=1 - [ACRR_ECOLI]		1.26302	0.622416	1.41509	1.11497	0.740999
P27550	acs	Acetyl-coenzyme A synthetase OS=Escherichia coli (strain K12) GN=acs PE=1 SV=2 - [ACSA_ECOLI]	1.56179	0.822296	0.201958	0.819073	0.621039	0.570537	0.333254	0.658479	0.87351	0.495335	0.474968
P26646	acuI	Probable acrylyl-CoA reductase AcuI OS=Escherichia coli (strain K12) GN=acuI PE=1 SV=1 - [ACUI_ECOLI]	2.13042	1.01711	0.539567	1.30375	0.971031	0.865146	0.389909	1.43167	1.15352	1.5195	0.894626
P22333	add	Adenosine deaminase OS=Escherichia coli (strain K12) GN=add PE=3 SV=2 - [ADD_ECOLI]	2.50261	0.550462	0.479564	1.10515	0.57838	0.618739
P31441	ade	Adenine deaminase OS=Escherichia coli (strain K12) GN=ade PE=1 SV=2 - [ADEC_ECOLI]		1.23721	0.707087	1.66031	0.702557	0.933844	0.355065	1.6666	1.64632	1.90165	0.84724
P0A9Q7	adhE	Aldehyde-alcohol dehydrogenase OS=Escherichia coli (strain K12) GN=adhE PE=1 SV=2 - [ADHE_ECOLI]	2.18574	0.495692	0.507396	0.762033	0.412265	1.85499	0.757598	2.29115	2.06248	1.94697	1.60934
P39451	adhP	Alcohol dehydrogenase, propanol-preferring OS=Escherichia coli (strain K12) GN=adhP PE=1 SV=1 - [ADHP_ECOLI]	1.47927
P69441	adk	Adenylate kinase OS=Escherichia coli (strain K12) GN=adk PE=1 SV=1 - [KAD_ECOLI]	0.643746	0.699458	0.495277	0.702639	0.29447	0.716149	0.282177	1.57065	1.31063	1.63521	0.987827
P23872	aes	Acetyl esterase OS=Escherichia coli (strain K12) GN=aes PE=1 SV=3 - [AES_ECOLI]	3.75938						0.390222	1.52171	1.68562	1.49926	0.898874
P0ACK2	agaR	Putative aga operon transcriptional repressor OS=Escherichia coli (strain K12) GN=agaR PE=4 SV=1 - [AGAR_ECOLI]	0.955845	0.731164	0.48885	0.760822	0.375688	0.742496	0.424376	1.47524	1.28476	1.42146	0.860292
P19926	agp	Glucose-1-phosphatase OS=Escherichia coli (strain K12) GN=agp PE=1 SV=1 - [AGP_ECOLI]	1.57107	1.11828	0.463915	1.13831	0.70177	0.904376	0.405884	0.887653	1.1666	0.777732	0.791149
P0AE08	ahpC	Alkyl hydroperoxide reductase subunit C OS=Escherichia coli (strain K12) GN=ahpC PE=1 SV=2 - [AHPC_ECOLI]	1.49321	0.933777	0.541939	0.905233	0.438559	0.661178	0.47612	1.4452	1.20153	1.45297	0.868447
P35340	ahpF	Alkyl hydroperoxide reductase subunit F OS=Escherichia coli (strain K12) GN=ahpF PE=1 SV=2 - [AHPF_ECOLI]	1.17728	1.00359	0.517348	1.32533	0.820138	0.738505	0.354668	1.61121	1.3842	1.47682	0.816102
P27250	ahr	Uncharacterized zinc-type alcohol dehydrogenase-like protein YjgB OS=Escherichia coli (strain K12) GN=yjgB PE=3 SV=2 - [YJGB_ECOLI]	1.35693	1.00436	0.375403	0.893679	0.721279	0.567622
P0A959	alaA	Glutamate-pyruvate aminotransferase AlaA OS=Escherichia coli (strain K12) GN=alaA PE=1 SV=1 - [ALAA_ECOLI]	0.587142	0.715121	0.366743	0.952631	0.689943	0.687003	0.362998	1.12847	1.13927	1.44651	0.884327
P77434	alaC	Glutamate-pyruvate aminotransferase AlaC OS=Escherichia coli (strain K12) GN=alaC PE=1 SV=1 - [ALAC_ECOLI]	1.20389	0.740294	0.423923	1.04316	0.759952	0.756778
P00957	alaS	Alanine--tRNA ligase OS=Escherichia coli (strain K12) GN=alaS PE=1 SV=2 - [SYA_ECOLI]	0.65606	0.788197	0.475305	0.738496	0.340096	0.752992	0.384121	1.32864	1.21759	1.4122	0.820012
P25553	aldA	Lactaldehyde dehydrogenase OS=Escherichia coli (strain K12) GN=aldA PE=1 SV=2 - [ALDA_ECOLI]	0.608698	0.603964	0.264006	0.513645	0.240968	0.849635	0.423419	0.852194	1.0196	1.33846	0.951079
P37685	aldB	Aldehyde dehydrogenase B OS=Escherichia coli (strain K12) GN=aldB PE=1 SV=2 - [ALDB_ECOLI]	1.50215	1.77827	0.427263	1.12462	0.690673	0.817053
P04395	alkA	DNA-3-methyladenine glycosylase 2 OS=Escherichia coli (strain K12) GN=alkA PE=1 SV=1 - [3MG2_ECOLI]	1.42086	1.10778	0.552493	1.14038	0.654934	0.764251	0.424166	1.00508	1.0207	0.917359	0.897246
P0ACN4	allR	HTH-type transcriptional repressor AllR OS=Escherichia coli (strain K12) GN=allR PE=1 SV=1 - [ALLR_ECOLI]	0.978962	0.787408	0.411466	0.720275	0.439782	0.573511
P0A6B4	alr	Alanine racemase, biosynthetic OS=Escherichia coli (strain K12) GN=alr PE=1 SV=1 - [ALR1_ECOLI]	1.3742	0.999125	0.564713	1.52685	1.07027	0.890477
P39265	alsB	D-allose-binding periplasmic protein OS=Escherichia coli (strain K12) GN=alsB PE=1 SV=1 - [ALSB_ECOLI]	1.06948	0.484823	0.443498	1.41773	1.16237	0.597675	0.200263	0.999088	1.11575	1.22032	0.939797
P26365	amiB	N-acetylmuramoyl-L-alanine amidase AmiB OS=Escherichia coli (strain K12) GN=amiB PE=1 SV=2 - [AMIB_ECOLI]	1.96039	0.919193	0.480738	1.12961	0.732701	0.63683	0.289628	1.26797	1.12311	1.08637	0.67071
P63883	amiC	N-acetylmuramoyl-L-alanine amidase AmiC OS=Escherichia coli (strain K12) GN=amiC PE=1 SV=1 - [AMIC_ECOLI]	1.0048	0.730253	0.467729	0.86742	0.52193	0.791583
P75820	amiD	N-acetylmuramoyl-L-alanine amidase AmiD OS=Escherichia coli (strain K12) GN=amiD PE=1 SV=1 - [AMID_ECOLI]	1.18028
P0AE12	amn	AMP nucleosidase OS=Escherichia coli (strain K12) GN=amn PE=1 SV=1 - [AMN_ECOLI]	0.972123	0.799805	0.456933	0.524999	0.239242	0.785435	0.478531	1.73184	1.24159	1.75316	0.872463
P00811	ampC	Beta-lactamase OS=Escherichia coli (strain K12) GN=ampC PE=1 SV=1 - [AMPC_ECOLI]	1.05471	0.873647	0.448185	1.1944	0.754774	0.743671	0.359667	1.25263	1.28313	1.30681	0.774557
P13016	ampD	1,6-anhydro-N-acetylmuramyl-L-alanine amidase AmpD OS=Escherichia coli (strain K12) GN=ampD PE=2 SV=1 - [AMPD_ECOLI]	1.81949	2.24675	1.2566	2.45152	1.19793	1.99937	1.92416	8.8661	7.6932	8.59581	1.57661
P0AE14	ampE	Protein AmpE OS=Escherichia coli (strain K12) GN=ampE PE=1 SV=1 - [AMPE_ECOLI]	3.08233	1.65628	0.670307	1.92426	1.34849	0.946707
P0AD70	ampH	D-alanyl-D-alanine-carboxypeptidase/endopeptidase AmpH OS=Escherichia coli (strain K12) GN=ampH PE=1 SV=1 - [AMPH_ECOLI]	1.06269	0.657204	0.359279	0.766379	0.518071	0.697244
P26612	amyA	Cytoplasmic alpha-amylase OS=Escherichia coli (strain K12) GN=amyA PE=3 SV=3 - [AMY2_ECOLI]	1.88167	0.671518	0.350817	0.891245	0.697737	0.69734	0.663409	1.33252	1.47684	1.36188	0.835268
P77570	anmK	Anhydro-N-acetylmuramic acid kinase OS=Escherichia coli (strain K12) GN=anmK PE=1 SV=1 - [ANMK_ECOLI]	2.55871	0.944907	0.525454	1.45226	0.887309	0.853621
P0A962	ansA	L-asparaginase 1 OS=Escherichia coli (strain K12) GN=ansA PE=1 SV=1 - [ASPG1_ECOLI]	0.809459	3.31882	1.67834	4.4653	2.25017	2.78849
P00805	ansB	L-asparaginase 2 OS=Escherichia coli (strain K12) GN=ansB PE=1 SV=2 - [ASPG2_ECOLI]	0.637721	0.939926	0.868454	3.08601	0.959724	1.53852		1.97613	2.507	2.43027	1.68571
P62672	apaG	Protein ApaG OS=Escherichia coli (strain K12) GN=apaG PE=3 SV=1 - [APAG_ECOLI]		1.13193	0.474847	1.26703	0.634064	0.671134	0.128718	2.94168	1.07388	1.37178	3.00703
P05637	apaH	Bis(5'-nucleosyl)-tetraphosphatase [symmetrical] OS=Escherichia coli (strain K12) GN=apaH PE=1 SV=2 - [APAH_ECOLI]	1.84975	0.914496	0.568841	1.52682	0.896591	0.783567
P0AB85	apbE	Thiamine biosynthesis lipoprotein ApbE OS=Escherichia coli (strain K12) GN=apbE PE=1 SV=1 - [APBE_ECOLI]	1.00963	1.98625	0.836913	1.95072	1.038	1.23441	0.244782	1.60006	0.915208	1.37965	0.77815
Q3T004	APCS	*CON* Serum amyloid P-component OS=Bos taurus GN=APCS PE=2 SV=1 - [SAMP_BOVIN]		0.810739	0.412097	8.14683	6.40105	1.01197
P0AE22	aphA	Class B acid phosphatase OS=Escherichia coli (strain K12) GN=aphA PE=1 SV=1 - [APHA_ECOLI]	1.26126	0.862136	0.703281	1.16966	0.41295	1.05715	0.317101	1.29579	1.12842	1.36922	1.03352
P07102	appA	Periplasmic AppA protein OS=Escherichia coli (strain K12) GN=appA PE=1 SV=2 - [PPA_ECOLI]	2.96692	1.02758	0.459005	1.5892	2.37792	0.751945
P26459	appC	Cytochrome bd-II oxidase subunit 1 OS=Escherichia coli (strain K12) GN=appC PE=1 SV=1 - [APPC_ECOLI]	0.878153
P69503	apt	Adenine phosphoribosyltransferase OS=Escherichia coli (strain K12) GN=apt PE=1 SV=1 - [APT_ECOLI]	1.07308	0.564743	0.415243	0.74865	0.362906	0.663925	0.440918	2.01149	1.72689	1.65183	1.39669
P0A9E0	araC	Arabinose operon regulatory protein OS=Escherichia coli (strain K12) GN=araC PE=1 SV=1 - [ARAC_ECOLI]		0.343952		1.0044	0.454572	0.560371
P02924	araF	L-arabinose-binding periplasmic protein OS=Escherichia coli (strain K12) GN=araF PE=1 SV=2 - [ARAF_ECOLI]	1.02115	0.815085	0.397391	1.01421	0.465016	0.898568
P0A9Q1	arcA	Aerobic respiration control protein ArcA OS=Escherichia coli (strain K12) GN=arcA PE=1 SV=1 - [ARCA_ECOLI]	2.28179	1.08202	0.644692	1.28335	0.805197	0.864166	0.404473	2.23324	1.66132	1.84202	0.842267
P0AEC3	arcB	Aerobic respiration control sensor protein ArcB OS=Escherichia coli (strain K12) GN=arcB PE=1 SV=1 - [ARCB_ECOLI]	1.64827	1.1398	0.757828	1.22491	0.428631	0.791121	0.31265	1.79167	1.44651	2.60469	1.54928
P0A6C5	argA	Amino-acid acetyltransferase OS=Escherichia coli (strain K12) GN=argA PE=1 SV=1 - [ARGA_ECOLI]		0.517027	0.452019	0.161112	0.100091	0.777372	0.384241	1.24915	1.10613	1.21809	0.91745
P0A6C8	argB	Acetylglutamate kinase OS=Escherichia coli (strain K12) GN=argB PE=1 SV=1 - [ARGB_ECOLI]	1.32355	0.472076	0.436751	0.247482	0.176226	0.580537	0.256353	1.07637	1.0138	1.32624	0.763919
P11446	argC	N-acetyl-gamma-glutamyl-phosphate reductase OS=Escherichia coli (strain K12) GN=argC PE=3 SV=1 - [ARGC_ECOLI]	0.436096	0.457746	0.449555	0.0978637	0.0887688	0.696414	0.744714	2.17236	1.14885	2.227	1.24591
P18335	argD	Acetylornithine/succinyldiaminopimelate aminotransferase OS=Escherichia coli (strain K12) GN=argD PE=1 SV=4 - [ARGD_ECOLI]	0.394881	0.429096	0.434451	0.120821	0.108654	0.702205	0.419239	1.25126	1.15006	1.35465	0.820222
P23908	argE	Acetylornithine deacetylase OS=Escherichia coli (strain K12) GN=argE PE=1 SV=2 - [ARGE_ECOLI]	1.77336	0.761267	0.64034	0.355712	0.254586	0.672578	0.53477	1.72565	1.55266	1.78379	0.908155
P06960	argF	Ornithine carbamoyltransferase chain F OS=Escherichia coli (strain K12) GN=argF PE=1 SV=4 - [OTC2_ECOLI]	0.757952	0.999732	0.627644	1.0548	0.582719	0.970699	0.413517	1.5648	2.23077	2.14166	1.4462
P0A6E4	argG	Argininosuccinate synthase OS=Escherichia coli (strain K12) GN=argG PE=1 SV=2 - [ASSY_ECOLI]	0.891436	0.526377	0.467988	0.201036	0.153026	0.753601	0.435082	1.45516	1.30472	1.61387	0.87705
P11447	argH	Argininosuccinate lyase OS=Escherichia coli (strain K12) GN=argH PE=1 SV=3 - [ARLY_ECOLI]	0.764165	0.628002	0.503438	0.119822	0.0764356	0.884624	0.595202	3.11128	2.4854	3.58276	1.21868
P04391	argI	Ornithine carbamoyltransferase chain I OS=Escherichia coli (strain K12) GN=argI PE=1 SV=3 - [OTC1_ECOLI]	0.722674	0.343461	0.324334	0.0826771	0.0427083	0.57893
P0A6D0	argR	Arginine repressor OS=Escherichia coli (strain K12) GN=argR PE=1 SV=1 - [ARGR_ECOLI]	1.01741	0.864555	0.518126	0.823052	0.362664	0.644965	0.392337	1.72245	1.40457	1.5012	0.729896
P11875	argS	Arginine--tRNA ligase OS=Escherichia coli (strain K12) GN=argS PE=1 SV=1 - [SYR_ECOLI]	1.25338	0.771795	0.495713	1.1175	0.775715	0.739592	0.377965	1.31834	1.42884	1.20106	0.892122
P09551	argT	Lysine-arginine-ornithine-binding periplasmic protein OS=Escherichia coli (strain K12) GN=argT PE=1 SV=3 - [ARGT_ECOLI]	1.00551	0.639245	0.209628	0.395123	0.251533	0.428416	0.337583	0.684332	0.824024	0.581546	0.608071
P77398	arnA	Bifunctional polymyxin resistance protein ArnA OS=Escherichia coli (strain K12) GN=arnA PE=1 SV=1 - [ARNA_ECOLI]	1.13128
P77690	arnB	UDP-4-amino-4-deoxy-L-arabinose--oxoglutarate aminotransferase OS=Escherichia coli (strain K12) GN=arnB PE=1 SV=2 - [ARNB_ECOLI]	1.79804	0.741329	0.436743	1.02957	0.789841	0.657173
P0A6D3	aroA	3-phosphoshikimate 1-carboxyvinyltransferase OS=Escherichia coli (strain K12) GN=aroA PE=1 SV=1 - [AROA_ECOLI]	1.07365	1.02946	0.532916	1.28568	0.810541	0.995149	0.621814	2.34782	2.37578	2.33977	1.12051
P07639	aroB	3-dehydroquinate synthase OS=Escherichia coli (strain K12) GN=aroB PE=3 SV=1 - [AROB_ECOLI]	1.23107	0.919723	0.528012	1.19543	0.704626	0.929642	0.336544	1.13982	0.968551	1.06044	0.741251
P12008	aroC	Chorismate synthase OS=Escherichia coli (strain K12) GN=aroC PE=1 SV=4 - [AROC_ECOLI]	1.13799	0.908564	0.514207	0.82344	0.30775	0.938492	0.338466	1.31202	1.17128	1.29814	0.981325
P05194	aroD	3-dehydroquinate dehydratase OS=Escherichia coli (strain K12) GN=aroD PE=1 SV=2 - [AROD_ECOLI]	1.64928	0.722477	0.410767	0.91492	0.565407	0.688684	0.376975	1.49112	1.35434	1.49736	0.900882
P15770	aroE	Shikimate dehydrogenase OS=Escherichia coli (strain K12) GN=aroE PE=1 SV=1 - [AROE_ECOLI]	1.26515	0.860456	0.502305	1.21069	0.792564	0.774094	0.41706	0.826115	0.9847	0.976007	0.715651
P00888	aroF	Phospho-2-dehydro-3-deoxyheptonate aldolase, Tyr-sensitive OS=Escherichia coli (strain K12) GN=aroF PE=1 SV=1 - [AROF_ECOLI]	2.26917	1.40792	0.667741	4.77594	3.55411	2.24702	0.199878	1.43933	0.553498	1.472	2.25518
P0AB91	aroG	Phospho-2-dehydro-3-deoxyheptonate aldolase, Phe-sensitive OS=Escherichia coli (strain K12) GN=aroG PE=1 SV=1 - [AROG_ECOLI]	0.985152	1.37814	0.658069	1.14109	0.658535	1.4865	0.419304	1.34707	1.18104	1.48717	1.05949
P00887	aroH	Phospho-2-dehydro-3-deoxyheptonate aldolase, Trp-sensitive OS=Escherichia coli (strain K12) GN=aroH PE=3 SV=4 - [AROH_ECOLI]	0.84503	0.754852	0.64432	1.29194	0.715235	1.11456	0.44319	1.89582	1.88695	2.06387	1.39099
P0A6D7	aroK	Shikimate kinase 1 OS=Escherichia coli (strain K12) GN=aroK PE=1 SV=2 - [AROK_ECOLI]	0.956629	0.819296	0.527043	0.820845	0.431547	0.770068	0.39987	1.48486	1.37172	1.58769	1.00221
P0A6E1	aroL	Shikimate kinase 2 OS=Escherichia coli (strain K12) GN=aroL PE=1 SV=3 - [AROL_ECOLI]	1.68152	1.15163	0.487663	1.4842	0.709171	0.963872	0.5113	2.25057	1.80389	2.45504	1.18549
P0AE28	aroM	Protein AroM OS=Escherichia coli (strain K12) GN=aroM PE=4 SV=1 - [AROM_ECOLI]	1.42469	0.987852	0.503596	0.961965	0.51269	0.619684
P0AB96	arsC	Arsenate reductase OS=Escherichia coli (strain K12) GN=arsC PE=3 SV=1 - [ARSC_ECOLI]	1.67425	2.09119	0.981482	1.83947	0.654869	1.06745
P30859	artI	Putative ABC transporter arginine-binding protein 2 OS=Escherichia coli (strain K12) GN=artI PE=1 SV=3 - [ARTI_ECOLI]	1.45908	0.632623	0.440434	0.341906	0.182041	0.607782	0.217788	1.43491	1.18064	1.41658	0.824956
P30860	artJ	ABC transporter arginine-binding protein 1 OS=Escherichia coli (strain K12) GN=artJ PE=1 SV=2 - [ARTJ_ECOLI]	0.724287	0.472739	0.41064	0.14091	0.115038	0.624161	0.172556	1.22936	1.15477	1.30303	0.720863
P0AE30	artM	Arginine ABC transporter permease protein ArtM OS=Escherichia coli (strain K12) GN=artM PE=1 SV=1 - [ARTM_ECOLI]		0.362875	0.284599	0.313177	0.342249	0.313769
P0AAF6	artP	Arginine transport ATP-binding protein ArtP OS=Escherichia coli (strain K12) GN=artP PE=1 SV=1 - [ARTP_ECOLI]	1.60279	0.468961	0.332765	0.322216	0.19106	0.529774
P0AE34	artQ	Arginine ABC transporter permease protein ArtQ OS=Escherichia coli (strain K12) GN=artQ PE=1 SV=1 - [ARTQ_ECOLI]		0.401958	0.218511	0.186777	0.132588	0.409409
P24240	ascB	6-phospho-beta-glucosidase AscB OS=Escherichia coli (strain K12) GN=ascB PE=3 SV=2 - [ASCB_ECOLI]		0.504944	0.279383	0.876256	0.575377	0.520117
P24242	ascG	HTH-type transcriptional regulator AscG OS=Escherichia coli (strain K12) GN=ascG PE=1 SV=4 - [ASCG_ECOLI]		0.843517	0.529854	0.892939	0.393271	0.698892
P0A9Q9	asd	Aspartate-semialdehyde dehydrogenase OS=Escherichia coli (strain K12) GN=asd PE=1 SV=1 - [DHAS_ECOLI]	0.886179	0.699419	0.455856	0.819652	0.456036	0.900936	0.452039	1.25205	1.16344	1.34871	1.05108
P28249	asmA	Protein AsmA OS=Escherichia coli (strain K12) GN=asmA PE=4 SV=2 - [ASMA_ECOLI]	1.07129	0.718001	0.323891	0.772082	0.441228	0.50633
P00963	asnA	Aspartate--ammonia ligase OS=Escherichia coli (strain K12) GN=asnA PE=1 SV=1 - [ASNA_ECOLI]	0.436332	0.341505	0.424563	0.940622	0.26423	0.661245	0.226925	0.776242	1.09072	0.562447	0.576508
P22106	asnB	Asparagine synthetase B [glutamine-hydrolyzing] OS=Escherichia coli (strain K12) GN=asnB PE=1 SV=3 - [ASNB_ECOLI]	0.634188	0.56986	0.434681	0.945475	0.340442	0.647126	0.314945	1.2289	1.08243	1.29225	0.747417
P0ACI6	asnC	Regulatory protein AsnC OS=Escherichia coli (strain K12) GN=asnC PE=1 SV=1 - [ASNC_ECOLI]	1.12605	0.858734	0.459614	1.03388	0.633014	0.680404
P0A8M0	asnS	Asparagine--tRNA ligase OS=Escherichia coli (strain K12) GN=asnS PE=1 SV=2 - [SYN_ECOLI]	0.583793	0.804143	0.5421	0.825067	0.48722	0.833423	0.470552	1.47619	1.31727	1.46191	0.882248
P0AC38	aspA	Aspartate ammonia-lyase OS=Escherichia coli (strain K12) GN=aspA PE=1 SV=1 - [ASPA_ECOLI]	1.12357	0.887035	0.55597	1.29933	0.655589	0.935677	0.308117	1.29758	1.34365	1.3087	0.70799
P00509	aspC	Aspartate aminotransferase OS=Escherichia coli (strain K12) GN=aspC PE=1 SV=1 - [AAT_ECOLI]	1.28001	0.952124	0.50033	1.23229	0.822794	0.912882	0.372108	1.40514	1.46405	1.31923	1.07239
P21889	aspS	Aspartate--tRNA ligase OS=Escherichia coli (strain K12) GN=aspS PE=1 SV=1 - [SYD_ECOLI]	0.748001	0.761696	0.479098	0.840117	0.454839	0.825846	0.521739	1.51446	1.26967	1.49982	1.03522
P0AE37	astA	Arginine N-succinyltransferase OS=Escherichia coli (strain K12) GN=astA PE=2 SV=1 - [ASTA_ECOLI]	1.46806
P76216	astB	N-succinylarginine dihydrolase OS=Escherichia coli (strain K12) GN=astB PE=1 SV=1 - [ASTB_ECOLI]	1.84377	0.836436	0.525101	1.31868	0.968691	0.768623
P77581	astC	Succinylornithine transaminase OS=Escherichia coli (strain K12) GN=astC PE=1 SV=1 - [ASTC_ECOLI]	1.34161	0.620231	0.178664	0.857127	0.618089	0.629081
P76217	astD	N-succinylglutamate 5-semialdehyde dehydrogenase OS=Escherichia coli (strain K12) GN=astD PE=1 SV=1 - [ASTD_ECOLI]	1.77255	0.416234	0.190656	0.57821	0.394585	0.39167
P76458	atoD	Acetate CoA-transferase subunit alpha OS=Escherichia coli (strain K12) GN=atoD PE=1 SV=1 - [ATOD_ECOLI]		0.999894	0.37415	3.94812	4.04233	0.770583
P0ABB0	atpA	ATP synthase subunit alpha OS=Escherichia coli (strain K12) GN=atpA PE=1 SV=1 - [ATPA_ECOLI]	1.33398	0.917633	0.476166	0.900297	0.485618	0.704986	0.332163	1.32239	0.964276	1.05114	0.598806
P0A6E6	atpC	ATP synthase epsilon chain OS=Escherichia coli (strain K12) GN=atpC PE=1 SV=2 - [ATPE_ECOLI]	1.69661	0.783731	0.434309	0.988119	0.478846	0.700599
P0ABB4	atpD	ATP synthase subunit beta OS=Escherichia coli (strain K12) GN=atpD PE=1 SV=2 - [ATPB_ECOLI]	1.97294	1.00024	0.548099	1.13134	0.454262	0.819098	0.478199	1.52614	1.27587	1.31145	0.670063
P68699	atpE	ATP synthase subunit c OS=Escherichia coli (strain K12) GN=atpE PE=1 SV=1 - [ATPL_ECOLI]	1.47489	1.24426	0.462727	1.02791	0.374231	0.717987
P0ABA0	atpF	ATP synthase subunit b OS=Escherichia coli (strain K12) GN=atpF PE=1 SV=1 - [ATPF_ECOLI]	1.6768	0.996503	0.585921	1.14304	0.778226	0.709767	1.02351	2.99072	2.30414	2.35751	0.982124
P0ABA6	atpG	ATP synthase gamma chain OS=Escherichia coli (strain K12) GN=atpG PE=1 SV=1 - [ATPG_ECOLI]	1.33845	0.904541	0.491303	0.907547	0.394183	0.701488	0.47654	2.05661	1.7106	2.0004	0.654707
P0ABA4	atpH	ATP synthase subunit delta OS=Escherichia coli (strain K12) GN=atpH PE=1 SV=1 - [ATPD_ECOLI]	2.04391	1.34775	0.585967	1.09985	0.329954	0.729468	0.266209	2.0632	0.576316	2.01741	0.701677
P09053	avtA	Valine--pyruvate aminotransferase OS=Escherichia coli (strain K12) GN=avtA PE=1 SV=3 - [AVTA_ECOLI]	1.27151	1.11541	0.567956	1.74536	1.22494	0.955696	0.682366	2.68539	2.74876	3.02153	1.01025
P41407	azoR	FMN-dependent NADH-azoreductase OS=Escherichia coli (strain K12) GN=azoR PE=1 SV=3 - [AZOR_ECOLI]	1.50363	0.858436	0.517779	1.01924	0.605508	0.702706	0.420381	1.42511	1.32825	1.20636	0.957214
P33666	b1401/b1405	Putative uncharacterized protein YdbA OS=Escherichia coli (strain K12) GN=ydbA PE=5 SV=2 - [YDBA_ECOLI]		2.2788	0.662593	1.19368	0.404128	1.02914
P76464	b2227/b2228	Putative UPF0192 protein YfaS OS=Escherichia coli (strain K12) GN=yfaS PE=5 SV=2 - [YFAS_ECOLI]							0.318248	1.28982	0.867499	0.923093	1.03273
P69228	baeR	Transcriptional regulatory protein BaeR OS=Escherichia coli (strain K12) GN=baeR PE=1 SV=1 - [BAER_ECOLI]	1.95808	1.08507	0.507522	1.24229	0.66983	0.746375	0.257797	1.14209	1.10252	1.16815	0.809301
P0A940	bamA	Outer membrane protein assembly factor BamA OS=Escherichia coli (strain K12) GN=bamA PE=1 SV=1 - [BAMA_ECOLI]	1.13688	0.773037	0.398874	0.952213	0.502577	0.6968	0.307707	1.36535	1.24601	1.31875	0.871775
P77774	bamB	Outer membrane protein assembly factor BamB OS=Escherichia coli (strain K12) GN=bamB PE=1 SV=1 - [BAMB_ECOLI]	1.25537	0.772149	0.487172	1.23561	0.763515	0.63776	0.378612	1.14964	1.15065	1.1814	0.749404
P0A903	bamC	Outer membrane protein assembly factor BamC OS=Escherichia coli (strain K12) GN=bamC PE=1 SV=1 - [BAMC_ECOLI]	1.57309	0.772403	0.394585	1.00557	0.686337	0.658352	0.290003	1.18499	1.14472	1.22178	0.821875
P0AC02	bamD	Outer membrane protein assembly factor BamD OS=Escherichia coli (strain K12) GN=bamD PE=1 SV=1 - [BAMD_ECOLI]	1.51329	0.660409	0.442233	1.27241	0.890137	0.65309	0.378657	1.21125	1.10296	1.23507	0.963686
P0A937	bamE	Outer membrane protein assembly factor BamE OS=Escherichia coli (strain K12) GN=bamE PE=1 SV=1 - [BAME_ECOLI]	1.14337	0.714487	0.48504	0.92915	0.631962	0.627776	0.500963	1.21098	1.12706	1.14519	0.814372
P30843	basR	Transcriptional regulatory protein BasR OS=Escherichia coli (strain K12) GN=basR PE=1 SV=3 - [BASR_ECOLI]	1.59207						0.61256	1.40538	1.10948	1.08737	0.870503
P0AE52	bcp	Putative peroxiredoxin bcp OS=Escherichia coli (strain K12) GN=bcp PE=1 SV=1 - [BCP_ECOLI]	1.55074	0.874633	0.533354	1.204	0.482821	0.747208	0.555608	1.37936	1.57908	1.48551	0.951016
P37653	bcsA	Cellulose synthase catalytic subunit [UDP-forming] OS=Escherichia coli (strain K12) GN=bcsA PE=1 SV=3 - [BCSA_ECOLI]	1.884						0.234608	1.39484	1.06349	1.54016	0.712872
P37652	bcsB	Cyclic di-GMP-binding protein OS=Escherichia coli (strain K12) GN=bcsB PE=1 SV=2 - [BCSB_ECOLI]		0.984376	0.432129	1.21008	0.564318	0.735665
P37657	bcsE	Protein BcsE homolog OS=Escherichia coli (strain K12) GN=bcsE PE=4 SV=1 - [BCSE_ECOLI]							0.407978	1.13043	1.73786	1.33341	0.747192
P39334	bdcR	Uncharacterized HTH-type transcriptional regulator YjgJ OS=Escherichia coli (strain K12) GN=yjgJ PE=4 SV=2 - [YJGJ_ECOLI]	0.990018	0.937514	0.655648	1.10964	0.454964	0.715455
P66948	bepA	TPR repeat-containing protein YfgC OS=Escherichia coli (strain K12) GN=yfgC PE=4 SV=1 - [YFGC_ECOLI]	1.37545	0.931645	0.417759	1.00805	0.810016	0.634173	0.398234	1.79033	1.38336	1.50595	0.942971
P17444	betA	Choline dehydrogenase OS=Escherichia coli (strain K12) GN=betA PE=1 SV=1 - [BETA_ECOLI]		0.79522	0.631147	1.03547	0.652209	0.831891
P17445	betB	Betaine aldehyde dehydrogenase OS=Escherichia coli (strain K12) GN=betB PE=1 SV=3 - [BETB_ECOLI]	0.71427	0.741384	0.344332	0.588385	0.317622	0.575815	0.49696	1.17316	1.25511	0.939054	0.78714
P17446	betI	HTH-type transcriptional regulator BetI OS=Escherichia coli (strain K12) GN=betI PE=3 SV=1 - [BETI_ECOLI]	1.05083
P0ABD3	bfr	Bacterioferritin OS=Escherichia coli (strain K12) GN=bfr PE=1 SV=1 - [BFR_ECOLI]	4.84015	2.70839	0.954409	1.50479	0.818084	0.95212
Q46829	bglA	6-phospho-beta-glucosidase BglA OS=Escherichia coli (strain K12) GN=bglA PE=1 SV=2 - [BGLA_ECOLI]	2.08557	0.957124	0.487799	1.34069	1.072	0.734522	0.486215	1.67867	1.68768	1.76533	0.858204
P33363	bglX	Periplasmic beta-glucosidase OS=Escherichia coli (strain K12) GN=bglX PE=1 SV=2 - [BGLX_ECOLI]	0.83757	0.766936	0.472615	0.854295	0.424007	0.694507	0.425288	1.43247	1.23837	1.55333	0.906422
P12995	bioA	Adenosylmethionine-8-amino-7-oxononanoate aminotransferase OS=Escherichia coli (strain K12) GN=bioA PE=1 SV=2 - [BIOA_ECOLI]	1.23567	0.73351	0.322956	1.37424	0.997912	0.587062	0.439236	1.00404	1.67084	1.02453	0.896169
P12996	bioB	Biotin synthase OS=Escherichia coli (strain K12) GN=bioB PE=1 SV=2 - [BIOB_ECOLI]	0.883918	11.973	10.7952	35.6096	13.5684	10.1698
P13000	bioD1	ATP-dependent dethiobiotin synthetase BioD 1 OS=Escherichia coli (strain K12) GN=bioD1 PE=1 SV=3 - [BIOD1_ECOLI]	1.84055	0.898799	0.46192	1.76177	1.16096	0.785475	0.19035	0.864644	1.17068	0.901098	0.781944
P0A6E9	bioD2	ATP-dependent dethiobiotin synthetase BioD 2 OS=Escherichia coli (strain K12) GN=bioD2 PE=3 SV=1 - [BIOD2_ECOLI]	0.805647	0.89439	0.66503	1.17434	0.567449	1.10718
P12998	bioF	8-amino-7-oxononanoate synthase OS=Escherichia coli (strain K12) GN=bioF PE=1 SV=1 - [BIOF_ECOLI]	0.879564	0.890557	0.534867	1.32291	0.915602	0.794469
P13001	bioH	Pimelyl-[acyl-carrier protein] methyl ester esterase OS=Escherichia coli (strain K12) GN=bioH PE=1 SV=1 - [BIOH_ECOLI]	1.6016	0.809384	0.388508	1.30007	1.00756	0.690226
P06709	birA	Bifunctional protein BirA OS=Escherichia coli (strain K12) GN=birA PE=1 SV=1 - [BIRA_ECOLI]	1.34571	0.733365	0.442572	1.22508	1.08899	0.696163	0.563388	1.74184	1.65322	2.45223	1.13282
P20099	bisC	Biotin sulfoxide reductase OS=Escherichia coli (strain K12) GN=bisC PE=3 SV=3 - [BISC_ECOLI]	1.53905	0.806476	0.536784	1.21989	0.729012	0.879214
P0A901	blc	Outer membrane lipoprotein blc OS=Escherichia coli (strain K12) GN=blc PE=1 SV=1 - [BLC_ECOLI]	1.61453	0.887937	0.461465	0.749558	0.703897	0.592635	0.439606	0.92004	0.744018	0.687757	0.688112
P0ABE2	bolA	Protein BolA OS=Escherichia coli (strain K12) GN=bolA PE=1 SV=1 - [BOLA_ECOLI]	1.36007	1.03756	0.545948	0.956737	0.510212	0.718505	0.456966	1.20139	1.0492	1.19941	0.941252
P77330	borD	Lipoprotein bor homolog from lambdoid prophage DLP12 OS=Escherichia coli (strain K12) GN=borD PE=3 SV=1 - [BORD_ECOLI]		1.22452	0.714336	0.869015	0.644076	0.592977
P39297	bsmA	Lipoprotein BsmA OS=Escherichia coli (strain K12) GN=bsmA PE=2 SV=2 - [BSMA_ECOLI]	1.58149	0.592296		1.10457	0.845231	0.54175
P06129	btuB	Vitamin B12 transporter BtuB OS=Escherichia coli (strain K12) GN=btuB PE=1 SV=2 - [BTUB_ECOLI]	1.12099	0.786232	0.430846	1.32141	0.730696	0.995957	0.428086	1.85227	1.73875	1.70687	1.32226
P06610	btuE	Vitamin B12 transport periplasmic protein BtuE OS=Escherichia coli (strain K12) GN=btuE PE=3 SV=1 - [BTUE_ECOLI]	1.87504	0.951654	0.538889	1.27113	0.506191	0.717268	0.199511	1.07113	0.861245	0.928358	0.835388
P37028	btuF	Vitamin B12-binding protein OS=Escherichia coli (strain K12) GN=btuF PE=1 SV=2 - [BTUF_ECOLI]		0.378255	0.175514	0.925838	1.018	0.396017
P0A9H5	btuR	Cob(I)yrinic acid a,c-diamide adenosyltransferase OS=Escherichia coli (strain K12) GN=btuR PE=3 SV=1 - [BTUR_ECOLI]	0.94008						0.504258	1.40543	1.21352	1.37033	1.25734
Q2UVX4	C3	*CON* Complement C3 OS=Bos taurus GN=C3 PE=1 SV=2 - [CO3_BOVIN]		0.280456	0.884057	1.25703	1.86907	0.561063	0.38264	1.74985	1.9729	2.59288	0.398171
P0A9H3	cadA	Lysine decarboxylase, inducible OS=Escherichia coli (strain K12) GN=cadA PE=1 SV=1 - [LDCI_ECOLI]							0.473186	2.64568	1.75472	1.76091	0.825592
P60584	caiA	Crotonobetainyl-CoA dehydrogenase OS=Escherichia coli (strain K12) GN=caiA PE=1 SV=1 - [CAIA_ECOLI]	1.20886
P31551	caiD	Carnitinyl-CoA dehydratase OS=Escherichia coli (strain K12) GN=caiD PE=1 SV=4 - [CAID_ECOLI]		0.592932	0.310824	0.456998	0.319114	0.477648
P61517	can	Carbonic anhydrase 2 OS=Escherichia coli (strain K12) GN=can PE=1 SV=1 - [CAN_ECOLI]	1.27545	0.749941	0.438261	1.02682	0.71944	0.65707	0.354047	1.04052	1.18608	1.07171	0.682834
P0A6F1	carA	Carbamoyl-phosphate synthase small chain OS=Escherichia coli (strain K12) GN=carA PE=1 SV=1 - [CARA_ECOLI]	0.308202	0.611556	0.489818	0.495358	0.315464	0.832922	0.396043	1.4924	1.7461	1.53084	1.00144
P00968	carB	Carbamoyl-phosphate synthase large chain OS=Escherichia coli (strain K12) GN=carB PE=1 SV=2 - [CARB_ECOLI]	0.274136	0.609369	0.506642	0.473061	0.230644	0.858383	0.475577	1.51928	1.81038	1.51851	0.950845
P36659	cbpA	Curved DNA-binding protein OS=Escherichia coli (strain K12) GN=cbpA PE=1 SV=2 - [CBPA_ECOLI]	2.14314	1.34965	0.639432	0.896278	0.500952	0.861214	0.117682	1.36143	0.813584	0.909165	0.413155
P31469	cbrC	UPF0167 protein CbrC OS=Escherichia coli (strain K12) GN=cbrC PE=2 SV=1 - [CBRC_ECOLI]							0.606862	24.1639	49.9289	19.299	0.894184
P06961	cca	Multifunctional CCA protein OS=Escherichia coli (strain K12) GN=cca PE=1 SV=1 - [CCA_ECOLI]	1.38631	0.990523	1.15025	1.02891	0.826033	0.767967	0.376933	1.54936	1.45125	1.47408	0.79648
P0ABM5	ccmD	Heme exporter protein D OS=Escherichia coli (strain K12) GN=ccmD PE=1 SV=1 - [CCMD_ECOLI]	1.26903
P69490	ccmE	Cytochrome c-type biogenesis protein CcmE OS=Escherichia coli (strain K12) GN=ccmE PE=1 SV=1 - [CCME_ECOLI]	1.13886	0.854917	0.543796	1.07159	0.596396	0.6771
P0ABM9	ccmH	Cytochrome c-type biogenesis protein CcmH OS=Escherichia coli (strain K12) GN=ccmH PE=1 SV=1 - [CCMH_ECOLI]		1.01206	0.593996	1.20218	0.714429	0.7732
P0ABF6	cdd	Cytidine deaminase OS=Escherichia coli (strain K12) GN=cdd PE=1 SV=1 - [CDD_ECOLI]	1.17715	0.984986	0.597125	1.12499	0.793087	0.971342	0.345901	1.4361	1.37824	1.44861	0.888245
P06282	cdh	CDP-diacylglycerol pyrophosphatase OS=Escherichia coli (strain K12) GN=cdh PE=3 SV=1 - [CDH_ECOLI]	1.01903	0.876073	0.515922	0.953951	0.568307	0.760835	0.726562	2.81078	2.52158	2.85563	0.759464
P0AE60	cedA	Cell division activator CedA OS=Escherichia coli (strain K12) GN=cedA PE=1 SV=2 - [CEDA_ECOLI]	1.74524
P0A9H7	cfa	Cyclopropane-fatty-acyl-phospholipid synthase OS=Escherichia coli (strain K12) GN=cfa PE=1 SV=2 - [CFA_ECOLI]	1.211	0.777321	0.502859	0.765502	0.437342	0.642931	0.44358	1.4423	1.28237	1.18046	0.753075
P0AE63	chaB	Cation transport regulator ChaB OS=Escherichia coli (strain K12) GN=chaB PE=1 SV=1 - [CHAB_ECOLI]	2.22331	2.21074	1.00989	1.91812	0.654914	1.21998
P69791	chbA	N,N'-diacetylchitobiose-specific phosphotransferase enzyme IIA component OS=Escherichia coli (strain K12) GN=chbA PE=1 SV=1 - [PTQA_ECOLI]	0.903126
P69795	chbB	N,N'-diacetylchitobiose-specific phosphotransferase enzyme IIB component OS=Escherichia coli (strain K12) GN=chbB PE=1 SV=1 - [PTQB_ECOLI]	1.05272
P17411	chbF	6-phospho-beta-glucosidase OS=Escherichia coli (strain K12) GN=chbF PE=1 SV=4 - [CHBF_ECOLI]		0.578053	0.634095	1.27468	1.24925	0.627175
P37794	chbG	UPF0249 protein ChbG OS=Escherichia coli (strain K12) GN=chbG PE=2 SV=2 - [CHBG_ECOLI]	1.57527	0.754825	0.582205	0.891139	0.501286	0.754218	0.670945	2.17844	2.09238	2.15131	1.46671
P07363	cheA	Chemotaxis protein CheA OS=Escherichia coli (strain K12) GN=cheA PE=1 SV=3 - [CHEA_ECOLI]	0.365196
P07363-2	cheA	Isoform cheA(S) of Chemotaxis protein CheA OS=Escherichia coli (strain K12) GN=cheA - [CHEA_ECOLI]		0.424465	0.268379	0.349419	0.174091	1.26496
P07330	cheB	Chemotaxis response regulator protein-glutamate methylesterase OS=Escherichia coli (strain K12) GN=cheB PE=1 SV=3 - [CHEB_ECOLI]	0.32614	0.316126	0.312201	0.306092	0.141057	1.30564
P0A964	cheW	Chemotaxis protein CheW OS=Escherichia coli (strain K12) GN=cheW PE=1 SV=1 - [CHEW_ECOLI]	0.143543	0.398481	0.411911	0.386338	0.383727	1.0212	0.586292	2.09252	3.88593	6.30844	9.82427
P0AE67	cheY	Chemotaxis protein CheY OS=Escherichia coli (strain K12) GN=cheY PE=1 SV=2 - [CHEY_ECOLI]	0.343626	0.468404	0.520063	0.403327	0.32961	1.31448	2.70568	1.76576	2.98712	5.18979	9.42694
P0A9H9	cheZ	Protein phosphatase CheZ OS=Escherichia coli (strain K12) GN=cheZ PE=1 SV=1 - [CHEZ_ECOLI]	0.190686	0.589798	0.695491	0.451995	0.129182	1.20069	1.67053	1.70009	1.97941	2.12438	4.02611
P13656	chiA	Probable bifunctional chitinase/lysozyme OS=Escherichia coli (strain K12) GN=chiA PE=1 SV=2 - [CHIA_ECOLI]		0.71348	0.420134	0.745527	0.446513	0.646744
P17315	cirA	Colicin I receptor OS=Escherichia coli (strain K12) GN=cirA PE=1 SV=2 - [CIRA_ECOLI]	0.362354	0.107342	0.0844012	0.176591	0.060405	0.106491	0.695763	0.930624	1.23727	1.08886	1.29791
P0A6G5	citX	Apo-citrate lyase phosphoribosyl-dephospho-CoA transferase OS=Escherichia coli (strain K12) GN=citX PE=2 SV=1 - [CITX_ECOLI]				1.23121	0.848858	0.349892
P37019	clcA	H(+)/Cl(-) exchange transporter ClcA OS=Escherichia coli (strain K12) GN=clcA PE=1 SV=2 - [CLCA_ECOLI]		0.627127	0.27659	0.505071	0.263416	0.501896
P0ABH9	clpA	ATP-dependent Clp protease ATP-binding subunit ClpA OS=Escherichia coli (strain K12) GN=clpA PE=1 SV=1 - [CLPA_ECOLI]	0.859383	1.01988	0.671501	0.556421	0.236262	0.810784	0.522187	1.56435	1.38269	1.55168	0.848442
P63284	clpB	Isoform ClpB-3 of Chaperone protein ClpB OS=Escherichia coli (strain K12) GN=clpB - [CLPB_ECOLI]	0.973618	1.01714	0.746965	0.97047	0.66296	0.596683	0.286227	1.83305	1.24233	1.68419	0.698764
P0A6G7	clpP	ATP-dependent Clp protease proteolytic subunit OS=Escherichia coli (strain K12) GN=clpP PE=1 SV=1 - [CLPP_ECOLI]	1.96634	0.830109	0.518536	0.670099	0.232456	0.789192	0.401865	1.879	1.74988	1.57558	1.11135
P0A8Q6	clpS	ATP-dependent Clp protease adapter protein ClpS OS=Escherichia coli (strain K12) GN=clpS PE=1 SV=1 - [CLPS_ECOLI]	0.769641
P0A6H1	clpX	ATP-dependent Clp protease ATP-binding subunit ClpX OS=Escherichia coli (strain K12) GN=clpX PE=1 SV=2 - [CLPX_ECOLI]	1.16865	0.989915	0.54593	0.940471	0.456566	0.85537	0.473544	1.94581	1.31108	1.80266	1.07721
P0A6I0	cmk	Cytidylate kinase OS=Escherichia coli (strain K12) GN=cmk PE=1 SV=1 - [KCY_ECOLI]	1.39876	0.81991	0.595684	0.882131	0.400005	0.803602	0.388064	1.55419	1.6734	1.77528	1.17241
P76290	cmoA	tRNA (cmo5U34)-methyltransferase OS=Escherichia coli (strain K12) GN=cmoA PE=1 SV=1 - [CMOA_ECOLI]	1.12842	1.02333	0.55697	1.34511	0.68771	0.795977	0.470926	1.3227	1.28374	1.22791	0.867676
P76291	cmoB	tRNA (mo5U34)-methyltransferase OS=Escherichia coli (strain K12) GN=cmoB PE=3 SV=1 - [CMOB_ECOLI]	1.42152	0.917454	0.473477	1.16541	0.54897	0.693281
P64467	cnu	OriC-binding nucleoid-associated protein OS=Escherichia coli (strain K12) GN=cnu PE=1 SV=1 - [CNU_ECOLI]	1.43069	1.00713	1.04218	0.894856	0.359962	0.856079	0.344049	2.88301	1.79692	2.77994	1.23672
P0A6I3	coaA	Pantothenate kinase OS=Escherichia coli (strain K12) GN=coaA PE=1 SV=1 - [COAA_ECOLI]	1.57241	0.827752	0.453651	1.14967	0.954865	0.708613
P0ABQ0	coaBC	Coenzyme A biosynthesis bifunctional protein CoaBC OS=Escherichia coli (strain K12) GN=coaBC PE=1 SV=2 - [COABC_ECOLI]		0.9214	0.535058	0.935488	0.402329	1.00477
P0A6I6	coaD	Phosphopantetheine adenylyltransferase OS=Escherichia coli (strain K12) GN=coaD PE=1 SV=1 - [COAD_ECOLI]	1.84321	0.683676	0.281587	0.686909	0.573521	0.275897
P0A6I9	coaE	Dephospho-CoA kinase OS=Escherichia coli (strain K12) GN=coaE PE=1 SV=1 - [COAE_ECOLI]	1.38864	1.04263	0.584884	1.36431	0.624783	0.786364	0.462954	2.03324	1.7417	1.89385	0.924398
P75960	cobB	NAD-dependent protein deacylase OS=Escherichia coli (strain K12) GN=cobB PE=1 SV=2 - [NPD_ECOLI]	1.49173	0.806001	0.459834	1.07589	0.619168	0.712924	0.440209	1.2992	1.3989	1.42731	0.782913
P36562	cobT	Nicotinate-nucleotide--dimethylbenzimidazole phosphoribosyltransferase OS=Escherichia coli (strain K12) GN=cobT PE=3 SV=3 - [COBT_ECOLI]	1.42515	0.632358	0.336405	1.35315	0.731162	0.6539
P25524	codA	Cytosine deaminase OS=Escherichia coli (strain K12) GN=codA PE=1 SV=3 - [CODA_ECOLI]	0.538544	0.77503	0.68918	0.540728	0.151785	1.02708	0.604866	2.18676	2.43214	2.51283	1.0592
P75974	cohE	Putative lambdoid prophage e14 repressor protein C2 OS=Escherichia coli (strain K12) GN=cohE PE=4 SV=1 - [COHE_ECOLI]	1.09591	0.958242	0.658278	1.30148	0.600776	0.916901
P75952	comR	Uncharacterized HTH-type transcriptional regulator YcfQ OS=Escherichia coli (strain K12) GN=ycfQ PE=4 SV=2 - [YCFQ_ECOLI]	0.912601	1.66605	1.46948	2.02145	0.792106	1.28676	0.60189	2.45709	2.19773	2.80897	1.09997
P0AE78	corC	Magnesium and cobalt efflux protein CorC OS=Escherichia coli (strain K12) GN=corC PE=3 SV=1 - [CORC_ECOLI]	0.986643	0.759893	0.548519	0.852099	0.512462	0.782198
P0AEW4	cpdA	3',5'-cyclic adenosine monophosphate phosphodiesterase CpdA OS=Escherichia coli (strain K12) GN=cpdA PE=1 SV=1 - [CPDA_ECOLI]	1.52286	1.10211	0.573625	1.71744	0.740585	0.728384	0.440364	1.41985	1.61348	1.30601	0.955587
P08331	cpdB	2',3'-cyclic-nucleotide 2'-phosphodiesterase/3'-nucleotidase OS=Escherichia coli (strain K12) GN=cpdB PE=1 SV=2 - [CPDB_ECOLI]	1.52938	0.891698	0.427204	1.14753	0.613824	0.657162	0.319744	2.61613	2.00129	2.52378	0.781298
P64559	cptB	Antitoxin CptB OS=Escherichia coli (strain K12) GN=cptB PE=1 SV=1 - [CPTB_ECOLI]		1.46435	1.16585	1.76402	0.634762	1.26159	0.250185	1.74378	1.51994	1.93722	1.24645
P0AE85	cpxP	Periplasmic protein CpxP OS=Escherichia coli (strain K12) GN=cpxP PE=1 SV=1 - [CPXP_ECOLI]	3.4763	1.86811	1.01271	1.90738	0.797346	0.804833
P0AE88	cpxR	Transcriptional regulatory protein CpxR OS=Escherichia coli (strain K12) GN=cpxR PE=3 SV=1 - [CPXR_ECOLI]	1.48832	1.00088	0.529499	1.21282	0.607328	0.78541	0.606456	1.88582	1.72134	1.98118	0.843296
P0ACP1	cra	Catabolite repressor/activator OS=Escherichia coli (strain K12) GN=cra PE=1 SV=1 - [CRA_ECOLI]		0.87238	0.399994	1.00884	0.507346	0.834394
P37002	crcB	Protein CrcB OS=Escherichia coli (strain K12) GN=crcB PE=1 SV=1 - [CRCB_ECOLI]		0.766868	0.475355	1.04105	0.619903	0.888315
P0AE91	creA	Protein CreA OS=Escherichia coli (strain K12) GN=creA PE=4 SV=1 - [CREA_ECOLI]	1.04366	0.818562	0.327613	0.745592	0.462359	0.500984
P08368	creB	Transcriptional regulatory protein CreB OS=Escherichia coli (strain K12) GN=creB PE=1 SV=1 - [CREB_ECOLI]	1.11547	0.82977	0.370494	0.634822	0.380359	0.480223
P24251	crl	Sigma factor-binding protein crl OS=Escherichia coli (strain K12) GN=crl PE=1 SV=5 - [CRL_ECOLI]	0.911161	0.744472	0.344608	0.863199	0.59191	0.657703	0.488716	0.956638	1.23765	1.18153	0.760326
P0ACJ8	crp	cAMP receptor protein OS=Escherichia coli (strain K12) GN=crp PE=1 SV=1 - [CRP_ECOLI]	1.61849	0.869926	0.466785	1.03265	0.695464	0.746816	0.401578	1.36254	1.20082	1.25776	0.779015
P69783	crr	Glucose-specific phosphotransferase enzyme IIA component OS=Escherichia coli (strain K12) GN=crr PE=1 SV=2 - [PTGA_ECOLI]	1.30835	0.681574	0.378431	0.919439	0.37548	0.591497	0.314307	1.42357	1.31323	1.30931	1.21858
Q46925	csdA	Cysteine sulfinate desulfinase OS=Escherichia coli (strain K12) GN=csdA PE=1 SV=1 - [CSDA_ECOLI]	1.45074	1.18358	0.603503	1.63047	1.09405	0.799245	0.363783	1.19766	1.34452	1.07725	0.783875
P0AGF2	csdE	Uncharacterized SufE-like protein YgdK OS=Escherichia coli (strain K12) GN=ygdK PE=1 SV=1 - [YGDK_ECOLI]	1.64857	1.0044	0.52051	1.29263	0.597117	0.62107	1.14832	2.53759	1.89343	2.43593	0.898017
P0AEA2	csgG	Curli production assembly/transport component CsgG OS=Escherichia coli (strain K12) GN=csgG PE=3 SV=1 - [CSGG_ECOLI]		0.831955	0.334571	0.809579	0.665911	0.603335
P37338	csiR	HTH-type transcriptional repressor CsiR OS=Escherichia coli (strain K12) GN=csiR PE=1 SV=2 - [CSIR_ECOLI]	1.85946
P0A9X9	cspA	Cold shock protein CspA OS=Escherichia coli (strain K12) GN=cspA PE=1 SV=2 - [CSPA_ECOLI]	1.51355	0.903554	0.712616	1.83922	0.801236	1.10229	0.236855	2.25654	2.26296	2.365	1.16572
P36995	cspB	Cold shock-like protein CspB OS=Escherichia coli (strain K12) GN=cspB PE=2 SV=1 - [CSPB_ECOLI]	3.16084	0.794721	0.529557	1.1858	0.835618	0.720718
P0A9Y6	cspC	Cold shock-like protein CspC OS=Escherichia coli (strain K12) GN=cspC PE=1 SV=2 - [CSPC_ECOLI]	1.53739	1.00662	0.738931	1.41573	0.487102	0.982362	0.172014	2.22742	1.65788	1.92347	1.37731
P0A968	cspD	Cold shock-like protein CspD OS=Escherichia coli (strain K12) GN=cspD PE=1 SV=1 - [CSPD_ECOLI]	0.618054	0.874686	0.804167	0.982246	0.399655	1.48508
P0A972	cspE	Cold shock-like protein CspE OS=Escherichia coli (strain K12) GN=cspE PE=1 SV=2 - [CSPE_ECOLI]	1.42027	0.948145	0.692267	1.52461	0.949925	1.22304	0.306776	1.98952	1.77584	2.33532	1.46572
P0A978	cspG	Cold shock-like protein CspG OS=Escherichia coli (strain K12) GN=cspG PE=1 SV=1 - [CSPG_ECOLI]	2.15784	0.864525	0.892532	1.68809	1.04773	0.544258
P0A986	cspI	Cold shock-like protein CspI OS=Escherichia coli (strain K12) GN=cspI PE=3 SV=1 - [CSPI_ECOLI]		1.19494	0.589811	1.6993	0.865031	1.01092
P69913	csrA	Carbon storage regulator OS=Escherichia coli (strain K12) GN=csrA PE=1 SV=1 - [CSRA_ECOLI]	1.10535	0.729101	0.524924	0.921867	0.466967	0.860527	0.431745	1.56116	1.4203	1.42916	0.974562
P15078	cstA	Carbon starvation protein A OS=Escherichia coli (strain K12) GN=cstA PE=1 SV=3 - [CSTA_ECOLI]		0.750167	0.42477	0.489671	0.269198	0.913793
P36649	cueO	Blue copper oxidase CueO OS=Escherichia coli (strain K12) GN=cueO PE=1 SV=2 - [CUEO_ECOLI]	1.7095	0.787961	0.412877	1.22902	0.727269	0.667176	0.335956	2.82139	2.34868	2.19175	0.644682
P0A9G4	cueR	HTH-type transcriptional regulator CueR OS=Escherichia coli (strain K12) GN=cueR PE=1 SV=1 - [CUER_ECOLI]	0.99065	0.803456	0.830896	1.3047	0.88493	0.826633
P76113	curA	NADPH-dependent curcumin reductase OS=Escherichia coli (strain K12) GN=curA PE=1 SV=3 - [CURA_ECOLI]	1.67296	0.747386	0.291639	0.874278	0.844482	0.565111
P77239	cusB	Cation efflux system protein CusB OS=Escherichia coli (strain K12) GN=cusB PE=1 SV=1 - [CUSB_ECOLI]							0.209916	3.0908	0.8713	0.988941	0.53193
P77214	cusF	Cation efflux system protein CusF OS=Escherichia coli (strain K12) GN=cusF PE=1 SV=1 - [CUSF_ECOLI]		0.460398	0.231275	2.09924	0.366083	0.520336
P0ACZ8	cusR	Transcriptional regulatory protein CusR OS=Escherichia coli (strain K12) GN=cusR PE=1 SV=1 - [CUSR_ECOLI]	0.958649
P67826	cutC	Copper homeostasis protein CutC OS=Escherichia coli (strain K12) GN=cutC PE=3 SV=1 - [CUTC_ECOLI]	1.58918	0.775559	0.492227	1.19849	0.690006	0.779564	0.314935	1.16784	1.1023	1.07704	0.838218
P08550	cvpA	Colicin V production protein OS=Escherichia coli (strain K12) GN=cvpA PE=1 SV=1 - [CVPA_ECOLI]	1.40575	0.776574	0.349962	0.976747	0.762972	0.534664	0.902404	1.8192	1.62582	1.78171	0.823732
P27838	cyaY	Protein CyaY OS=Escherichia coli (strain K12) GN=cyaY PE=1 SV=1 - [CYAY_ECOLI]	1.30204	1.05176	0.551536	1.4881	0.628878	0.680852
P0AAE0	cycA	D-serine/D-alanine/glycine transporter OS=Escherichia coli (strain K12) GN=cycA PE=1 SV=1 - [CYCA_ECOLI]	1.00444
P0ABJ9	cydA	Cytochrome d ubiquinol oxidase subunit 1 OS=Escherichia coli (strain K12) GN=cydA PE=1 SV=1 - [CYDA_ECOLI]	0.75249	0.982937	0.860676	0.888003	0.493599	0.908126	0.306567	2.20743	1.14412	2.50836	0.859312
P0ABK2	cydB	Cytochrome d ubiquinol oxidase subunit 2 OS=Escherichia coli (strain K12) GN=cydB PE=1 SV=1 - [CYDB_ECOLI]		0.766625	0.692492	0.873708	0.422031	0.971862	0.394102	2.61442	1.54794	2.70055	1.08001
P23886	cydC	ATP-binding/permease protein CydC OS=Escherichia coli (strain K12) GN=cydC PE=3 SV=2 - [CYDC_ECOLI]		1.01867	0.519331	1.00872	0.320917	0.676547
P29018	cydD	ATP-binding/permease protein CydD OS=Escherichia coli (strain K12) GN=cydD PE=1 SV=3 - [CYDD_ECOLI]		0.834795	0.528987	0.898908	0.439028	0.702055
P56100	cydX	Uncharacterized protein YbgT OS=Escherichia coli (strain K12) GN=ybgT PE=1 SV=1 - [YBGT_ECOLI]	1.14645						0.506564	2.55058	0.620397	3.23882	0.65942
P27111	cynR	HTH-type transcriptional regulator CynR OS=Escherichia coli (strain K12) GN=cynR PE=1 SV=5 - [CYNR_ECOLI]		1.00595	0.53322	1.20631	0.623126	0.668538
P0ABJ1	cyoA	Ubiquinol oxidase subunit 2 OS=Escherichia coli (strain K12) GN=cyoA PE=1 SV=1 - [CYOA_ECOLI]	1.01103	0.634749	0.370071	0.63029	0.279591	0.63158	0.280392	1.11985	1.2144	1.1591	0.652537
P0ABI8	cyoB	Ubiquinol oxidase subunit 1 OS=Escherichia coli (strain K12) GN=cyoB PE=1 SV=1 - [CYOB_ECOLI]	0.80821	0.682036	0.333363	0.619321	0.293467	0.589273
P16676	cysA	Sulfate/thiosulfate import ATP-binding protein CysA OS=Escherichia coli (strain K12) GN=cysA PE=3 SV=2 - [CYSA_ECOLI]	1.15213
P0A9F3	cysB	HTH-type transcriptional regulator CysB OS=Escherichia coli (strain K12) GN=cysB PE=3 SV=1 - [CYSB_ECOLI]	0.759946	0.670754	0.446309	0.789095	0.496183	0.804452	0.382191	1.47469	1.17229	1.34857	0.720025
P0A6J1	cysC	Adenylyl-sulfate kinase OS=Escherichia coli (strain K12) GN=cysC PE=1 SV=2 - [CYSC_ECOLI]	0.966154	0.171087	0.0898576	0.479009	0.930862	0.326306	0.281607	1.55006	0.957427	1.39791	1.04534
P21156	cysD	Sulfate adenylyltransferase subunit 2 OS=Escherichia coli (strain K12) GN=cysD PE=1 SV=3 - [CYSD_ECOLI]	0.966767	0.720643	0.498339	0.77661	0.525514	0.774315	0.53656	1.69905	1.62962	2.22824	0.840123
P0A9D4	cysE	Serine acetyltransferase OS=Escherichia coli (strain K12) GN=cysE PE=1 SV=1 - [CYSE_ECOLI]	1.33412	0.969471	0.57828	1.27855	0.64493	0.768259
P0AEA8	cysG	Siroheme synthase OS=Escherichia coli (strain K12) GN=cysG PE=1 SV=1 - [CYSG_ECOLI]	1.34896	1.13908	0.624905	1.55935	0.739493	0.887553	0.459682	1.60604	1.44163	1.68461	1.01664
P17854	cysH	Phosphoadenosine phosphosulfate reductase OS=Escherichia coli (strain K12) GN=cysH PE=1 SV=3 - [CYSH_ECOLI]	1.74382	0.791155	0.536777	1.89311	1.48756	0.704251	0.210764	1.79515	1.14719	1.53605	0.891337
P17846	cysI	Sulfite reductase [NADPH] hemoprotein beta-component OS=Escherichia coli (strain K12) GN=cysI PE=1 SV=4 - [CYSI_ECOLI]	1.53994	0.845634	0.608953	1.08322	0.591266	0.986709
P38038	cysJ	Sulfite reductase [NADPH] flavoprotein alpha-component OS=Escherichia coli (strain K12) GN=cysJ PE=1 SV=4 - [CYSJ_ECOLI]	0.633418	0.835356	0.665941	0.874321	0.416078	1.28655	0.371661	1.9873	1.3551	1.69028	0.929149
P0ABK5	cysK	Cysteine synthase A OS=Escherichia coli (strain K12) GN=cysK PE=1 SV=2 - [CYSK_ECOLI]	0.972731	0.832645	0.537824	1.14053	0.664627	0.793744	0.301806	1.35503	1.06886	1.29213	0.908161
P16703	cysM	Cysteine synthase B OS=Escherichia coli (strain K12) GN=cysM PE=1 SV=1 - [CYSM_ECOLI]	0.862718	0.775746	0.589113	1.04302	0.61706	0.891629	1.07957	1.43995	1.4783	1.53212	0.989735
P23845	cysN	Sulfate adenylyltransferase subunit 1 OS=Escherichia coli (strain K12) GN=cysN PE=1 SV=1 - [CYSN_ECOLI]	0.813483	0.726839	0.479251	0.712425	0.400154	0.754596	0.23623	1.20105	0.679388	0.783841	0.602638
P16700	cysP	Thiosulfate-binding protein OS=Escherichia coli (strain K12) GN=cysP PE=1 SV=1 - [CYSP_ECOLI]	1.02696	0.808772	0.505049	1.19648	0.812811	0.746195	0.323504	1.51704	1.07279	1.57328	0.890368
P22255	cysQ	3'(2'),5'-bisphosphate nucleotidase CysQ OS=Escherichia coli (strain K12) GN=cysQ PE=1 SV=2 - [CYSQ_ECOLI]	1.71135	3.41021	1.53629	3.35652	2.0437	2.23067	0.421338	1.07318	0.800562	0.981745	0.686304
P21888	cysS	Cysteine--tRNA ligase OS=Escherichia coli (strain K12) GN=cysS PE=1 SV=2 - [SYC_ECOLI]	1.18006	0.772923	0.459967	0.993126	0.707476	0.71196	0.503997	1.44754	1.48371	1.40826	1.03056
P0AEB0	cysW	Sulfate transport system permease protein CysW OS=Escherichia coli (strain K12) GN=cysW PE=1 SV=1 - [CYSW_ECOLI]		0.560318	0.222689	0.895064	1.08339	0.562002
P0A6J3	cysZ	Protein CysZ OS=Escherichia coli (strain K12) GN=cysZ PE=1 SV=1 - [CYSZ_ECOLI]		1.60856	0.783467	1.72451	1.00752	0.951337
P0ACN7	cytR	HTH-type transcriptional repressor CytR OS=Escherichia coli (strain K12) GN=cytR PE=1 SV=1 - [CYTR_ECOLI]	1.34464	0.727099	0.391593	0.828762	0.429907	0.530854
P0AEB2	dacA	D-alanyl-D-alanine carboxypeptidase DacA OS=Escherichia coli (strain K12) GN=dacA PE=1 SV=1 - [DACA_ECOLI]	1.25829	0.747724	0.403651	0.983693	0.658828	0.622136	0.161184	1.62866	1.34568	1.36126	0.755014
P08506	dacC	D-alanyl-D-alanine carboxypeptidase DacC OS=Escherichia coli (strain K12) GN=dacC PE=1 SV=2 - [DACC_ECOLI]	1.50094	0.832287	0.359616	0.719447	0.47186	0.611799	0.383667	1.19209	0.972602	0.969343	0.645445
P0A6J5	dadA	D-amino acid dehydrogenase small subunit OS=Escherichia coli (strain K12) GN=dadA PE=2 SV=1 - [DADA_ECOLI]	1.06781	0.897517	0.376924	0.880595	0.661926	0.675658	0.602622	1.20111	1.48347	1.17742	0.823984
P29012	dadX	Alanine racemase, catabolic OS=Escherichia coli (strain K12) GN=dadX PE=2 SV=2 - [ALR2_ECOLI]	1.1228	0.736592	0.379799	1.10773	0.867718	0.656314
P11557	damX	Protein DamX OS=Escherichia coli (strain K12) GN=damX PE=1 SV=2 - [DAMX_ECOLI]	1.04735	0.867027	0.386697	0.682679	0.327853	0.673397
P0A6L2	dapA	4-hydroxy-tetrahydrodipicolinate synthase OS=Escherichia coli (strain K12) GN=dapA PE=1 SV=1 - [DAPA_ECOLI]	0.970711	0.818297	0.491129	1.12833	0.614971	0.798905	0.389279	1.29804	1.21648	1.2157	0.935935
P04036	dapB	4-hydroxy-tetrahydrodipicolinate reductase OS=Escherichia coli (strain K12) GN=dapB PE=1 SV=1 - [DAPB_ECOLI]	0.789469	0.863775	0.528832	0.845412	0.351713	0.794138	0.402664	1.3255	1.18922	1.34676	0.876451
P0A9D8	dapD	2,3,4,5-tetrahydropyridine-2,6-dicarboxylate N-succinyltransferase OS=Escherichia coli (strain K12) GN=dapD PE=1 SV=1 - [DAPD_ECOLI]	1.07335	0.767052	0.396612	0.874663	0.594909	0.72752	0.372294	1.15325	1.12812	1.13529	0.86071
P0AED7	dapE	Succinyl-diaminopimelate desuccinylase OS=Escherichia coli (strain K12) GN=dapE PE=1 SV=1 - [DAPE_ECOLI]	1.14489	0.875423	0.503075	1.07307	0.792931	0.802842
P0A6K1	dapF	Diaminopimelate epimerase OS=Escherichia coli (strain K12) GN=dapF PE=1 SV=1 - [DAPF_ECOLI]	1.42961	0.954959	0.520758	1.47974	0.97189	0.791815	0.407073	1.32326	1.31166	1.15502	0.859604
P28248	dcd	Deoxycytidine triphosphate deaminase OS=Escherichia coli (strain K12) GN=dcd PE=1 SV=1 - [DCD_ECOLI]	0.704755	2.1366		2.23389	0.941725	1.0067	0.553509	3.87385	2.86168	4.35189	0.981037
P0AED9	dcm	DNA-cytosine methyltransferase OS=Escherichia coli (strain K12) GN=dcm PE=1 SV=1 - [DCM_ECOLI]	1.3989	0.828301	0.5348	0.999648	0.558688	0.787153	0.373945	1.28853	1.18375	2.44314	0.739194
P24171	dcp	Peptidyl-dipeptidase dcp OS=Escherichia coli (strain K12) GN=dcp PE=1 SV=4 - [DCP_ECOLI]	1.13509	0.681923	0.470402	0.945472	0.714642	0.727032	0.418576	1.46536	1.30809	1.49036	1.04582
P0AEE1	dcrB	Protein DcrB OS=Escherichia coli (strain K12) GN=dcrB PE=1 SV=1 - [DCRB_ECOLI]	1.73864	0.943319	0.505012	1.41281	0.771568	0.934804	0.431765	1.54101	1.64481	1.59547	0.893119
P0ABN5	dcuA	Anaerobic C4-dicarboxylate transporter DcuA OS=Escherichia coli (strain K12) GN=dcuA PE=1 SV=1 - [DCUA_ECOLI]	0.760973	1.53338	0.834662	1.15852	0.657253	1.5846
P0ABP3	dcuC	Anaerobic C4-dicarboxylate transporter DcuC OS=Escherichia coli (strain K12) GN=dcuC PE=3 SV=1 - [DCUC_ECOLI]		0.942276	0.519391	1.53828	0.639892	1.11569
P76316	dcyD	D-cysteine desulfhydrase OS=Escherichia coli (strain K12) GN=dcyD PE=1 SV=4 - [DCYD_ECOLI]	0.676979	0.922658	0.553998	1.09757	0.598631	0.825998	0.366182	1.46052	1.19012	1.51463	0.946617
P0A6J8	ddlA	D-alanine--D-alanine ligase A OS=Escherichia coli (strain K12) GN=ddlA PE=3 SV=1 - [DDLA_ECOLI]	1.35596	0.84921	0.563882	1.10102	0.50567	0.732708	0.409047	1.4792	1.39143	1.42824	0.920682
P07862	ddlB	D-alanine--D-alanine ligase B OS=Escherichia coli (strain K12) GN=ddlB PE=1 SV=3 - [DDLB_ECOLI]	1.41766	0.774036	0.447442	1.10155	0.634856	0.808517	0.410696	1.14183	1.15803	1.1952	0.892994
P76128	ddpA	Probable D,D-dipeptide-binding periplasmic protein DdpA OS=Escherichia coli (strain K12) GN=ddpA PE=2 SV=1 - [DDPA_ECOLI]	1.41565
P0A9P6	deaD	Cold-shock DEAD box protein A OS=Escherichia coli (strain K12) GN=deaD PE=1 SV=2 - [DEAD_ECOLI]		0.708426	0.458467	0.782646	0.402771	0.516162	0.410218	1.55329	1.24533	1.39666	0.78298
P09549	dedD	Protein DedD OS=Escherichia coli (strain K12) GN=dedD PE=4 SV=2 - [DEDD_ECOLI]	1.08077	1.24679	0.706035	1.77433	0.869271	1.11284
P0A6K3	def	Peptide deformylase OS=Escherichia coli (strain K12) GN=def PE=1 SV=2 - [DEF_ECOLI]	1.13385	0.787131	0.327382	1.15155	0.790071	0.524296	0.469263	1.95937	1.68699	2.12595	0.800216
P0C0V0	degP	Periplasmic serine endoprotease DegP OS=Escherichia coli (strain K12) GN=degP PE=1 SV=1 - [DEGP_ECOLI]	1.50886	0.646854	0.301135	0.659065	0.470738	0.426633	0.254585	1.22519	0.99703	1.12689	0.481999
P39099	degQ	Periplasmic pH-dependent serine endoprotease DegQ OS=Escherichia coli (strain K12) GN=degQ PE=1 SV=1 - [DEGQ_ECOLI]	1.58806	0.949839	0.424819	0.812076	0.457465	0.779553
P07650	deoA	Thymidine phosphorylase OS=Escherichia coli (strain K12) GN=deoA PE=1 SV=3 - [TYPH_ECOLI]	2.41456	0.840242	0.389042	1.20267	1.03897	0.615896	0.303801	1.16008	1.21095	1.3193	0.736989
P0A6K6	deoB	Phosphopentomutase OS=Escherichia coli (strain K12) GN=deoB PE=1 SV=1 - [DEOB_ECOLI]	1.85343	0.904447	0.469	1.11422	0.674119	0.667334	0.259327	0.896945	0.807431	0.785845	0.577435
P0A6L0	deoC	Deoxyribose-phosphate aldolase OS=Escherichia coli (strain K12) GN=deoC PE=1 SV=1 - [DEOC_ECOLI]	2.01143	0.950389	0.467549	1.23416	0.828027	0.580079	0.410352	1.146	1.1969	1.03347	0.761148
P0ABP8	deoD	Purine nucleoside phosphorylase DeoD-type OS=Escherichia coli (strain K12) GN=deoD PE=1 SV=2 - [DEOD_ECOLI]	0.730287	0.907311	0.530131	0.692694	0.416389	0.740014	0.397366	1.33358	1.06574	1.43439	0.78713
P0ACK5	deoR	Deoxyribose operon repressor OS=Escherichia coli (strain K12) GN=deoR PE=1 SV=1 - [DEOR_ECOLI]	2.46866
P0A6P5	der	GTPase Der OS=Escherichia coli (strain K12) GN=der PE=1 SV=1 - [DER_ECOLI]	1.22867	1.06038	0.567321	1.49799	0.769621	0.94069	0.440593	2.05899	1.52824	2.00874	0.967035
P0ABN1	dgkA	Diacylglycerol kinase OS=Escherichia coli (strain K12) GN=dgkA PE=1 SV=2 - [KDGL_ECOLI]		1.70736	0.507461	1.59856	1.19362	1.11948
P31459	dgoK	2-dehydro-3-deoxygalactonokinase OS=Escherichia coli (strain K12) GN=dgoK PE=4 SV=1 - [DGOK_ECOLI]	1.94866
P31460	dgoR	Galactonate operon transcriptional repressor OS=Escherichia coli (strain K12) GN=dgoR PE=4 SV=4 - [DGOR_ECOLI]	1.1792						0.843877	3.15683	2.34602	2.84538	1.16832
P15723	dgt	Deoxyguanosinetriphosphate triphosphohydrolase OS=Escherichia coli (strain K12) GN=dgt PE=1 SV=4 - [DGTP_ECOLI]	1.43554
P76015	dhaK	PTS-dependent dihydroxyacetone kinase, dihydroxyacetone-binding subunit DhaK OS=Escherichia coli (strain K12) GN=dhaK PE=1 SV=2 - [DHAK_ECOLI]	1.02878	0.898839	0.504167	0.76199	0.327663	0.846459	1.44854	3.81066	4.8552	3.61241	1.03164
P76014	dhaL	PTS-dependent dihydroxyacetone kinase, ADP-binding subunit DhaL OS=Escherichia coli (strain K12) GN=dhaL PE=1 SV=3 - [DHAL_ECOLI]	1.37834	0.780215	0.504291	0.705046	0.332417	0.774834	0.393786	1.30191	1.511	1.36172	0.877643
P37349	dhaM	PTS-dependent dihydroxyacetone kinase, phosphotransferase subunit DhaM OS=Escherichia coli (strain K12) GN=dhaM PE=1 SV=3 - [DHAM_ECOLI]	1.28465	1.48009	0.897634	1.20607	0.535915	1.17325	0.45673	1.19789	1.31402	1.22799	0.988212
P66817	diaA	DnaA initiator-associating protein DiaA OS=Escherichia coli (strain K12) GN=diaA PE=1 SV=1 - [DIAA_ECOLI]	1.23458	0.780511	0.486505	1.02931	0.63312	0.720923	0.15433	1.22998	1.03097	1.28393	0.835032
P06966	dicA	HTH-type transcriptional regulator DicA OS=Escherichia coli (strain K12) GN=dicA PE=4 SV=1 - [DICA_ECOLI]	1.96015	0.805972	0.515024	0.673096	0.437266	0.598791
P0ABR1	dinI	DNA-damage-inducible protein I OS=Escherichia coli (strain K12) GN=dinI PE=1 SV=1 - [DINI_ECOLI]	1.3554	1.01298	1.83377	1.41433	0.446525	1.01534
Q47150	dinJ	Antitoxin DinJ OS=Escherichia coli (strain K12) GN=dinJ PE=1 SV=1 - [DINJ_ECOLI]	1.67669	1.70275	1.59371	1.43859	0.583694	1.07794	0.453699	1.77926	0.757044	1.58721	1.63232
A5A624	dinQ	Uncharacterized protein DinQ OS=Escherichia coli (strain K12) GN=dinQ PE=2 SV=1 - [DINQ_ECOLI]	1.24382
Q46857	dkgA	2,5-diketo-D-gluconic acid reductase A OS=Escherichia coli (strain K12) GN=dkgA PE=1 SV=3 - [DKGA_ECOLI]	2.07654	0.938493	0.297511	0.933267	0.895396	0.525379	0.472688	1.02405	0.882249	0.922786	0.760303
P30863	dkgB	2,5-diketo-D-gluconic acid reductase B OS=Escherichia coli (strain K12) GN=dkgB PE=1 SV=2 - [DKGB_ECOLI]	3.12062	1.1098	0.685143	2.0171	1.63965	0.780207		1.45378	1.77231	1.51415	1.05638
P0ABS1	dksA	RNA polymerase-binding transcription factor DksA OS=Escherichia coli (strain K12) GN=dksA PE=1 SV=1 - [DKSA_ECOLI]	1.18464	0.841278	0.575794	0.978862	0.406444	0.818659	0.351229	1.26947	1.13256	1.6065	1.02621
P06149	dld	D-lactate dehydrogenase OS=Escherichia coli (strain K12) GN=dld PE=1 SV=3 - [DLD_ECOLI]	1.14939	0.734574	0.407794	0.913887	0.584168	0.837605	0.558261	2.04877	1.86471	2.01395	0.782887
P76251	dmlA	D-malate dehydrogenase [decarboxylating] OS=Escherichia coli (strain K12) GN=dmlA PE=1 SV=1 - [DMLA_ECOLI]	0.981184	0.930869	0.544867	0.757688	0.35695	0.711059
P76250	dmlR	HTH-type transcriptional regulator DmlR OS=Escherichia coli (strain K12) GN=dmlR PE=1 SV=2 - [DMLR_ECOLI]		1.06373	0.642996	1.39303	0.745169	0.921484
P18775	dmsA	Dimethyl sulfoxide reductase DmsA OS=Escherichia coli (strain K12) GN=dmsA PE=1 SV=2 - [DMSA_ECOLI]		1.85403	1.29546	9.07388	3.48944	5.18352
P18776	dmsB	Anaerobic dimethyl sulfoxide reductase chain B OS=Escherichia coli (strain K12) GN=dmsB PE=1 SV=4 - [DMSB_ECOLI]							0.566419	7.63407	3.22195	8.53915	1.66443
P69853	dmsD	Tat proofreading chaperone DmsD OS=Escherichia coli (strain K12) GN=dmsD PE=1 SV=2 - [DMSD_ECOLI]	1.64081	1.23818	0.845861	1.83761	0.934913	1.17308
P03004	dnaA	Chromosomal replication initiator protein DnaA OS=Escherichia coli (strain K12) GN=dnaA PE=1 SV=2 - [DNAA_ECOLI]	2.27588	1.32203	0.610954	1.43874	0.962047	0.694629
P0ACB0	dnaB	Replicative DNA helicase OS=Escherichia coli (strain K12) GN=dnaB PE=1 SV=1 - [DNAB_ECOLI]	1.30185	1.19243	0.506559	1.77287	0.9827	0.845371	0.509436	1.62577	1.45578	1.30546	0.945238
P0AEF0	dnaC	DNA replication protein DnaC OS=Escherichia coli (strain K12) GN=dnaC PE=1 SV=1 - [DNAC_ECOLI]	2.60159	0.620073	0.170412	1.00416	0.887681	0.326833
P10443	dnaE	DNA polymerase III subunit alpha OS=Escherichia coli (strain K12) GN=dnaE PE=1 SV=1 - [DPO3A_ECOLI]		0.865916	0.465677	1.07389	0.569374	0.499907
P0ABS5	dnaG	DNA primase OS=Escherichia coli (strain K12) GN=dnaG PE=1 SV=1 - [PRIM_ECOLI]	1.19824	0.746452	0.43553	1.05286	0.759562	0.686989	0.289725	1.23364	1.23622	1.2616	0.848627
P08622	dnaJ	Chaperone protein DnaJ OS=Escherichia coli (strain K12) GN=dnaJ PE=1 SV=3 - [DNAJ_ECOLI]	1.09049	0.845992	0.639159	0.899138	0.423043	0.793745	0.223356	1.78538	1.12785	1.79952	0.629658
P0A6Y8	dnaK	Chaperone protein DnaK OS=Escherichia coli (strain K12) GN=dnaK PE=1 SV=2 - [DNAK_ECOLI]	0.858198	0.802633	0.718939	0.721183	0.308479	0.540457	0.335308	1.76672	1.35697	1.78156	0.826264
P0A988	dnaN	DNA polymerase III subunit beta OS=Escherichia coli (strain K12) GN=dnaN PE=1 SV=1 - [DPO3B_ECOLI]	1.4231	0.836238	0.459918	1.1711	0.865721	0.727233	0.360741	1.21147	1.24253	1.10131	0.76156
P03007	dnaQ	DNA polymerase III subunit epsilon OS=Escherichia coli (strain K12) GN=dnaQ PE=1 SV=1 - [DPO3E_ECOLI]	2.32594	2.36587	2.55678	3.67089	2.18429	2.02965	0.293704	1.82497	1.81897	1.74414	0.728174
P0A8J2	dnaT	Primosomal protein 1 OS=Escherichia coli (strain K12) GN=dnaT PE=1 SV=2 - [DNAT_ECOLI]	1.71602	0.561968	0.207856	0.828153	0.738463	0.279986
P06710	dnaX	DNA polymerase III subunit tau OS=Escherichia coli (strain K12) GN=dnaX PE=1 SV=1 - [DPO3X_ECOLI]	1.34591	1.03356	0.492208	0.750428	0.363964	0.616046
P0AEF4	dpiA	Transcriptional regulatory protein DpiA OS=Escherichia coli (strain K12) GN=dpiA PE=1 SV=1 - [DPIA_ECOLI]	2.93311
P23847	dppA	Periplasmic dipeptide transport protein OS=Escherichia coli (strain K12) GN=dppA PE=1 SV=1 - [DPPA_ECOLI]	1.04307	1.12342	0.451349	1.11948	0.364366	0.952494	0.456455	1.37043	1.56796	1.60358	1.14431
P0AEG1	dppC	Dipeptide transport system permease protein DppC OS=Escherichia coli (strain K12) GN=dppC PE=1 SV=1 - [DPPC_ECOLI]	0.687113	1.57593	0.57589	1.17236	0.434579	1.63016	0.487864	1.47604	1.51272	1.67045	1.00878
P0AAG0	dppD	Dipeptide transport ATP-binding protein DppD OS=Escherichia coli (strain K12) GN=dppD PE=3 SV=1 - [DPPD_ECOLI]	0.896433	1.34792	0.572284	1.44462	0.57503	1.40009	1.20336	7.03761	6.26397	10.1871	1.17631
P37313	dppF	Dipeptide transport ATP-binding protein DppF OS=Escherichia coli (strain K12) GN=dppF PE=3 SV=1 - [DPPF_ECOLI]	0.859139	1.93296	0.958572	1.63344	0.539044	1.92349
P0ABT2	dps	DNA protection during starvation protein OS=Escherichia coli (strain K12) GN=dps PE=1 SV=2 - [DPS_ECOLI]	2.60224	1.6195	0.388876	1.76106	1.12394	0.857317	0.354992	1.1359	0.779791	0.975236	0.646126
P0AEG4	dsbA	Thiol:disulfide interchange protein DsbA OS=Escherichia coli (strain K12) GN=dsbA PE=1 SV=1 - [DSBA_ECOLI]	1.7664	1.37817	0.627993	2.22118	0.932967	0.816422	0.277181	1.45607	1.41274	1.31381	0.998528
P0A6M2	dsbB	Disulfide bond formation protein B OS=Escherichia coli (strain K12) GN=dsbB PE=1 SV=1 - [DSBB_ECOLI]	1.30305	1.79033	0.735789	1.81778	1.27121	1.18011
P0AEG6	dsbC	Thiol:disulfide interchange protein DsbC OS=Escherichia coli (strain K12) GN=dsbC PE=1 SV=1 - [DSBC_ECOLI]	1.39922	1.12077	0.60214	1.32936	0.650734	0.792716	0.354461	1.62448	1.38886	1.58802	1.00107
P77202	dsbG	Thiol:disulfide interchange protein DsbG OS=Escherichia coli (strain K12) GN=dsbG PE=1 SV=2 - [DSBG_ECOLI]	1.08976	1.5311	0.694407	2.06147	0.926732	0.969236	0.369598	1.21516	1.12314	1.21043	0.908775
P00926	dsdA	D-serine dehydratase OS=Escherichia coli (strain K12) GN=dsdA PE=1 SV=3 - [SDHD_ECOLI]	1.42921	0.94408	0.601036	2.3263	2.28569	0.92872
P0A6M4	dtd	D-tyrosyl-tRNA(Tyr) deacylase OS=Escherichia coli (strain K12) GN=dtd PE=1 SV=1 - [DTD_ECOLI]	1.29278	0.773761	0.389679	0.925037	0.582788	0.594036	0.337898	1.09956	1.09945	0.966538	0.732009
P77304	dtpA	Dipeptide and tripeptide permease A OS=Escherichia coli (strain K12) GN=dtpA PE=1 SV=1 - [DTPA_ECOLI]	0.564239	0.428578	0.321151	0.588132	0.34617	0.415462	0.257141	0.840951	0.932561	0.823343	0.484839
P36837	dtpB	Dipeptide and tripeptide permease B OS=Escherichia coli (strain K12) GN=dtpB PE=1 SV=2 - [DTPB_ECOLI]							0.299087	0.915557	0.952388	1.10413	0.599454
P32695	dusA	tRNA-dihydrouridine synthase A OS=Escherichia coli (strain K12) GN=dusA PE=3 SV=3 - [DUSA_ECOLI]	1.4309	0.954654	0.403955	1.22521	1.01948	0.601023	0.320317	1.07464	1.08207	1.04774	0.677756
P0ABT5	dusB	tRNA-dihydrouridine synthase B OS=Escherichia coli (strain K12) GN=dusB PE=3 SV=1 - [DUSB_ECOLI]							0.4044	1.73343	1.32166	2.13176	0.775169
P33371	dusC	tRNA-dihydrouridine synthase C OS=Escherichia coli (strain K12) GN=dusC PE=3 SV=1 - [DUSC_ECOLI]	1.59744	0.644956		1.09651	0.771553	0.451023	0.450831	1.39708	1.4269	1.25692	0.906998
P06968	dut	Deoxyuridine 5'-triphosphate nucleotidohydrolase OS=Escherichia coli (strain K12) GN=dut PE=1 SV=1 - [DUT_ECOLI]	1.70837	0.311856	0.130682	0.941607	0.553825	0.600053	0.407403	1.32565	1.2374	1.17973	0.806138
P45568	dxr	1-deoxy-D-xylulose 5-phosphate reductoisomerase OS=Escherichia coli (strain K12) GN=dxr PE=1 SV=2 - [DXR_ECOLI]	1.90185	0.92569	0.485585	1.83369	1.30265	0.892074	0.40731	1.08466	1.31004	1.17625	0.810699
P77488	dxs	1-deoxy-D-xylulose-5-phosphate synthase OS=Escherichia coli (strain K12) GN=dxs PE=1 SV=3 - [DXS_ECOLI]	0.848079	0.879543	0.489878	1.03603	0.631456	0.799837	0.412873	1.38934	1.28815	1.49231	0.978901
P0AC73	ebgC	Evolved beta-galactosidase subunit beta OS=Escherichia coli (strain K12) GN=ebgC PE=1 SV=1 - [EBGC_ECOLI]		0.970163	0.528733	1.24353	1.06754	0.785319
P06846	ebgR	HTH-type transcriptional regulator EbgR OS=Escherichia coli (strain K12) GN=ebgR PE=4 SV=2 - [EBGR_ECOLI]	1.33007	0.651847	0.36004	0.747924	0.406463	0.671821
P0ADB4	ecnA	Entericidin A OS=Escherichia coli (strain K12) GN=ecnA PE=3 SV=1 - [ECNA_ECOLI]	1.05205	1.02394	0.517748	1.3125	0.614491	0.881884	0.648307	1.40762	1.33004	1.5942	0.795787
P0ADB7	ecnB	Entericidin B OS=Escherichia coli (strain K12) GN=ecnB PE=3 SV=1 - [ECNB_ECOLI]	1.40517						0.613176	0.899027	0.653376	0.622245	0.607725
P23827	eco	Ecotin OS=Escherichia coli (strain K12) GN=eco PE=1 SV=1 - [ECOT_ECOLI]	1.08838	0.512012	0.248227	0.574756	0.303427	0.3989	0.318469	2.26159	1.8309	2.14267	0.731852
P0A955	eda	KHG/KDPG aldolase OS=Escherichia coli (strain K12) GN=eda PE=1 SV=1 - [ALKH_ECOLI]	1.10778	0.792321	0.516086	1.22416	0.800252	0.769671	0.374915	1.28137	1.33355	1.32279	0.860496
P0ADF6	edd	Phosphogluconate dehydratase OS=Escherichia coli (strain K12) GN=edd PE=2 SV=1 - [EDD_ECOLI]	0.720402	0.675336	0.684232	0.717315	0.415537	1.6207
P31545	efeB	Deferrochelatase/peroxidase EfeB OS=Escherichia coli (strain K12) GN=efeB PE=1 SV=2 - [EFEB_ECOLI]	0.714784	0.504573	0.427129	0.61924	0.279449	0.577657	0.669918	1.25304	1.77549	1.18802	1.24614
P0AB24	efeO	Iron uptake system component EfeO OS=Escherichia coli (strain K12) GN=efeO PE=1 SV=1 - [EFEO_ECOLI]	0.705328	0.486809	0.338596	0.480701	0.226119	0.345696	0.27897	0.863746	1.41427	0.65172	1.19144
P0A6N4	efp	Elongation factor P OS=Escherichia coli (strain K12) GN=efp PE=1 SV=2 - [EFP_ECOLI]	0.918064	0.882765	0.646917	0.986862	0.42935	0.748952	0.474066	1.45195	1.2192	1.49319	1.07366
P0AEH3	elaA	Protein ElaA OS=Escherichia coli (strain K12) GN=elaA PE=3 SV=1 - [ELAA_ECOLI]	1.13366	1.32549	0.732552	1.28688	0.623441	1.12829	0.75244	2.51456	1.78265	2.62376	1.21465
P0AEH5	elaB	Protein ElaB OS=Escherichia coli (strain K12) GN=elaB PE=1 SV=1 - [ELAB_ECOLI]	1.92335	1.46415	0.550898	1.78427	1.42828	0.804734	0.357349	0.990953	0.691281	0.758957	0.642376
P0ABU5	elbB	Enhancing lycopene biosynthesis protein 2 OS=Escherichia coli (strain K12) GN=elbB PE=1 SV=1 - [ELBB_ECOLI]	1.18587	0.823883	0.483691	0.893907	0.451723	0.718299	0.500086	1.51278	1.32487	1.49905	1.13213
P27303	emrA	Multidrug resistance protein A OS=Escherichia coli (strain K12) GN=emrA PE=3 SV=2 - [EMRA_ECOLI]	0.812877	0.715128	0.709811	0.876459	0.432906	0.833925
P52599	emrK	Multidrug resistance protein K OS=Escherichia coli (strain K12) GN=emrK PE=3 SV=2 - [EMRK_ECOLI]	1.82977
P0C960	emtA	Endo-type membrane-bound lytic murein transglycosylase A OS=Escherichia coli (strain K12) GN=emtA PE=1 SV=1 - [EMTA_ECOLI]	1.59508	0.737731	0.624425	1.10879	0.796126	0.720616	0.474598	1.7262	1.68772	1.97297	1.27293
P0A6P7	engB	Probable GTP-binding protein EngB OS=Escherichia coli (strain K12) GN=engB PE=1 SV=1 - [ENGB_ECOLI]	1.5686	0.927801	0.612235	1.32705	0.839769	0.857226	0.635648	3.0408	2.66699	2.93252	1.10876
P0A6P9	eno	Enolase OS=Escherichia coli (strain K12) GN=eno PE=1 SV=2 - [ENO_ECOLI]	2.34792	0.941908	0.481962	1.67919	0.916035	0.729402	0.366391	1.36694	1.34161	1.24112	0.957109
P15047	entA	2,3-dihydro-2,3-dihydroxybenzoate dehydrogenase OS=Escherichia coli (strain K12) GN=entA PE=1 SV=1 - [ENTA_ECOLI]	1.08905	0.186612	0.154202	0.22089	0.129349	0.150798	0.13175	0.597938	0.515184	0.26528	1.43072
P0ADI4	entB	Isochorismatase OS=Escherichia coli (strain K12) GN=entB PE=1 SV=1 - [ENTB_ECOLI]	0.638618	0.110915	0.0937701	0.124973	0.0669475	0.0874528
P0AEJ2	entC	Isochorismate synthase EntC OS=Escherichia coli (strain K12) GN=entC PE=1 SV=1 - [ENTC_ECOLI]	0.484357	0.110316	0.12618	0.149992	0.0651698	0.106025
P10378	entE	Enterobactin synthase component E OS=Escherichia coli (strain K12) GN=entE PE=1 SV=3 - [ENTE_ECOLI]	0.589581	0.296626	0.184261	0.356055	0.191554	0.289788	0.415665	0.549422	0.526478	0.42314	0.942713
P11454	entF	Enterobactin synthase component F OS=Escherichia coli (strain K12) GN=entF PE=1 SV=3 - [ENTF_ECOLI]	0.596216	0.251167	0.191884	0.227763	0.130823	0.165195	0.634122	0.560666	0.56236	0.458125	1.42215
P0A8Y8	entH	Proofreading thioesterase EntH OS=Escherichia coli (strain K12) GN=entH PE=1 SV=1 - [ENTH_ECOLI]	1.01077
P37690	envC	Murein hydrolase activator EnvC OS=Escherichia coli (strain K12) GN=envC PE=1 SV=2 - [ENVC_ECOLI]	1.41249
P0A9B6	epd	D-erythrose-4-phosphate dehydrogenase OS=Escherichia coli (strain K12) GN=epd PE=1 SV=2 - [E4PD_ECOLI]	0.949887	0.837548	0.52685	0.962241	0.625814	0.801859
P0A8N7	epmA	Elongation factor P--(R)-beta-lysine ligase OS=Escherichia coli (strain K12) GN=epmA PE=1 SV=1 - [EPMA_ECOLI]	0.856532	0.914829	0.652628	0.991029	0.642151	0.972839	2.91418	9.23415	8.08415	8.38008	0.717612
P39280	epmB	L-lysine 2,3-aminomutase OS=Escherichia coli (strain K12) GN=epmB PE=1 SV=1 - [EPMB_ECOLI]	1.31496	1.05806	0.53532	1.58628	0.87893	0.855225	0.970433	3.24482	3.58558	3.13655	1.00656
P58107	EPPK1	*CON* Epiplakin OS=Homo sapiens GN=EPPK1 PE=1 SV=1 - [EPIPL_HUMAN]		0.582443	0.712848	1.37144	1.20412	0.674135
P37661	eptB	Phosphoethanolamine transferase EptB OS=Escherichia coli (strain K12) GN=eptB PE=1 SV=3 - [EPTB_ECOLI]	2.10863	1.05096	0.448619	1.7848	1.26449	0.643019
P0CB39	eptC	Phosphoethanolamine transferase EptC OS=Escherichia coli (strain K12) GN=eptC PE=1 SV=1 - [EPTC_ECOLI]	0.947585
P06616	era	GTPase Era OS=Escherichia coli (strain K12) GN=era PE=1 SV=2 - [ERA_ECOLI]	1.0638	0.7651	0.506726	1.17931	0.859456	0.789914	0.360575	1.73775	1.40599	1.87039	0.88206
P39176	erfK	Probable L,D-transpeptidase ErfK/SrfK OS=Escherichia coli (strain K12) GN=erfK PE=1 SV=2 - [ERFK_ECOLI]	1.65321	0.782872	0.469032	0.909781	0.524032	0.771881
P0ACC3	erpA	Iron-sulfur cluster insertion protein ErpA OS=Escherichia coli (strain K12) GN=erpA PE=1 SV=1 - [ERPA_ECOLI]	1.28062	1.06095	0.697915	1.14553	0.573092	0.713184	0.164195	3.86789	3.31918	3.78973	1.18135
P38134	etk	Tyrosine-protein kinase etk OS=Escherichia coli (strain K12) GN=etk PE=1 SV=2 - [ETK_ECOLI]	0.710263
P76551	eutA	Ethanolamine utilization protein EutA OS=Escherichia coli (strain K12) GN=eutA PE=3 SV=1 - [EUTA_ECOLI]	0.867845
P76540	eutK	Ethanolamine utilization protein EutK OS=Escherichia coli (strain K12) GN=eutK PE=1 SV=2 - [EUTK_ECOLI]	1.68694
P76541	eutL	Ethanolamine utilization protein EutL OS=Escherichia coli (strain K12) GN=eutL PE=1 SV=1 - [EUTL_ECOLI]		0.838614	0.506537	0.877891	0.493832	0.680203	2.20438	3.40078	3.51735	3.24962	0.91185
P0ABF4	eutM	Ethanolamine utilization protein EutM OS=Escherichia coli (strain K12) GN=eutM PE=1 SV=1 - [EUTM_ECOLI]	1.61098						0.256929	1.31456	1.10301	1.37704	1.12388
P0ACZ4	evgA	Positive transcription regulator EvgA OS=Escherichia coli (strain K12) GN=evgA PE=1 SV=1 - [EVGA_ECOLI]	0.845508	1.06485	0.537182	1.24416	0.448756	0.7781	0.606663	3.86309	3.02209	3.80092	0.843498
P30855	evgS	Sensor protein EvgS OS=Escherichia coli (strain K12) GN=evgS PE=1 SV=2 - [EVGS_ECOLI]		0.794451	0.429272	1.03835	0.505776	0.738396
P0ABU7	exbB	Biopolymer transport protein ExbB OS=Escherichia coli (strain K12) GN=exbB PE=1 SV=1 - [EXBB_ECOLI]	0.858884	0.746292	0.509519	0.519852	0.181464	0.491449
P0ABV2	exbD	Biopolymer transport protein ExbD OS=Escherichia coli (strain K12) GN=exbD PE=1 SV=1 - [EXBD_ECOLI]	0.883769	0.620267	0.474617	0.575178	0.179092	0.354962	0.542215	1.33006	1.05719	0.895317	1.00648
P0AEK0	exoX	Exodeoxyribonuclease 10 OS=Escherichia coli (strain K12) GN=exoX PE=1 SV=1 - [EXOX_ECOLI]	1.72536	0.723497	0.567266	1.10527	0.670099	0.837902
P0ACL2	exuR	Exu regulon transcriptional regulator OS=Escherichia coli (strain K12) GN=exuR PE=4 SV=1 - [EXUR_ECOLI]	1.05248	1.33968	0.756934	1.62801	1.1448	1.19108	0.719511	5.43472	4.78934	6.22135	1.04101
P0A6Q3	fabA	3-hydroxydecanoyl-[acyl-carrier-protein] dehydratase OS=Escherichia coli (strain K12) GN=fabA PE=1 SV=2 - [FABA_ECOLI]	1.18974	0.74645	0.440031	1.13332	0.672156	0.675278	0.476112	1.37313	1.34638	1.48526	1.02511
P0A953	fabB	3-oxoacyl-[acyl-carrier-protein] synthase 1 OS=Escherichia coli (strain K12) GN=fabB PE=1 SV=1 - [FABB_ECOLI]	1.8812	0.833069	0.48898	1.43324	1.03753	0.700929	0.381773	1.22028	1.36356	1.25653	0.82261
P0AAI9	fabD	Malonyl CoA-acyl carrier protein transacylase OS=Escherichia coli (strain K12) GN=fabD PE=1 SV=2 - [FABD_ECOLI]	1.6247	1.0974	0.566789	1.28368	0.699522	0.833757	0.320857	1.46558	1.33943	1.41734	0.922574
P0AAI5	fabF	3-oxoacyl-[acyl-carrier-protein] synthase 2 OS=Escherichia coli (strain K12) GN=fabF PE=1 SV=2 - [FABF_ECOLI]	1.36165	0.731701	0.473259	1.2703	0.96084	0.743974	0.439796	1.34319	1.45263	1.37518	0.852621
P0AEK2	fabG	3-oxoacyl-[acyl-carrier-protein] reductase FabG OS=Escherichia coli (strain K12) GN=fabG PE=1 SV=1 - [FABG_ECOLI]	1.15382	0.764042	0.508209	1.11613	0.579968	0.781182	0.439894	1.035	1.09021	1.0898	0.976329
P0A6R0	fabH	3-oxoacyl-[acyl-carrier-protein] synthase 3 OS=Escherichia coli (strain K12) GN=fabH PE=1 SV=1 - [FABH_ECOLI]	1.37141	0.835203	0.517067	1.14777	0.713462	0.88262	0.409904	1.33306	1.38651	1.60658	1.07441
P0AEK4	fabI	Enoyl-[acyl-carrier-protein] reductase [NADH] FabI OS=Escherichia coli (strain K12) GN=fabI PE=1 SV=2 - [FABI_ECOLI]	0.986805	0.736851	0.438337	0.959534	0.624736	0.716732	0.509371	1.09698	1.2574	1.19385	0.862921
P0ACU5	fabR	HTH-type transcriptional repressor FabR OS=Escherichia coli (strain K12) GN=fabR PE=1 SV=1 - [FABR_ECOLI]	1.57631	0.816355	0.395272	0.782508	0.525157	0.544141	0.375104	1.15015	1.11808	0.862238	0.631294
P0A6Q6	fabZ	3-hydroxyacyl-[acyl-carrier-protein] dehydratase FabZ OS=Escherichia coli (strain K12) GN=fabZ PE=1 SV=1 - [FABZ_ECOLI]	1.35411	0.620614	0.534462	0.623081	0.419208	0.660752
P21151	fadA	3-ketoacyl-CoA thiolase OS=Escherichia coli (strain K12) GN=fadA PE=1 SV=3 - [FADA_ECOLI]	1.83591
P69451	fadD	Long-chain-fatty-acid--CoA ligase OS=Escherichia coli (strain K12) GN=fadD PE=1 SV=1 - [LCFA_ECOLI]		0.505783	0.155309	0.530057	0.410223	0.355127	0.339825	1.61762	1.4602	1.60223	0.783858
Q47146	fadE	Acyl-coenzyme A dehydrogenase OS=Escherichia coli (strain K12) GN=fadE PE=2 SV=2 - [FADE_ECOLI]	0.766078	0.710071	0.357887	0.767842	0.362135	0.776951
P77399	fadJ	Fatty acid oxidation complex subunit alpha OS=Escherichia coli (strain K12) GN=fadJ PE=1 SV=1 - [FADJ_ECOLI]	1.00051
P10384	fadL	Long-chain fatty acid transport protein OS=Escherichia coli (strain K12) GN=fadL PE=1 SV=5 - [FADL_ECOLI]	0.93444	1.15671	0.596	1.93883	0.980828	0.96568	0.57102	4.61242	4.15931	3.92742	2.26161
P0A8V6	fadR	Fatty acid metabolism regulator protein OS=Escherichia coli (strain K12) GN=fadR PE=1 SV=2 - [FADR_ECOLI]	1.32254	0.360765	0.0929536	0.484182	0.440903	0.202121	0.841588	2.84001	2.58338	2.86692	0.832949
P0AB71	fbaA	Fructose-bisphosphate aldolase class 2 OS=Escherichia coli (strain K12) GN=fbaA PE=1 SV=2 - [ALF_ECOLI]	2.38864	0.676229	0.43854	1.49914	1.07783	0.825115	0.482796	1.16323	1.3183	1.27231	0.907907
P0A991	fbaB	Fructose-bisphosphate aldolase class 1 OS=Escherichia coli (strain K12) GN=fbaB PE=1 SV=2 - [ALF1_ECOLI]	1.23324	0.868744	0.316101	0.693921	0.454093	0.520258	0.242971	0.929579	0.495806	0.557262	0.400542
P0A993	fbp	Fructose-1,6-bisphosphatase class 1 OS=Escherichia coli (strain K12) GN=fbp PE=1 SV=1 - [F16PA_ECOLI]	1.31928	0.943026	0.519837	1.15933	0.556143	0.833025	0.400311	1.37038	1.37333	1.34998	0.854403
P32177	fdhD	Protein FdhD OS=Escherichia coli (strain K12) GN=fdhD PE=3 SV=1 - [FDHD_ECOLI]	1.12974	0.78805	0.395623	0.936066	0.669953	0.614164
P13024	fdhE	Protein FdhE OS=Escherichia coli (strain K12) GN=fdhE PE=3 SV=2 - [FDHE_ECOLI]	1.89234	0.939324	0.510529	1.67292	1.21439	0.873907	0.476506	1.64193	1.84294	1.32525	1.00191
P32176	fdoG	Formate dehydrogenase-O major subunit OS=Escherichia coli (strain K12) GN=fdoG PE=1 SV=5 - [FDOG_ECOLI]	1.45289	0.830124	0.488672	1.42539	0.921347	0.886668	0.334102	1.19114	1.28677	1.18834	0.655006
P0AAJ5	fdoH	Formate dehydrogenase-O iron-sulfur subunit OS=Escherichia coli (strain K12) GN=fdoH PE=1 SV=1 - [FDOH_ECOLI]	2.06499	5.38351	3.39944	8.90867	3.7102	4.77112
P0A9R4	fdx	2Fe-2S ferredoxin OS=Escherichia coli (strain K12) GN=fdx PE=1 SV=2 - [FER_ECOLI]	1.16162						0.367895	1.92731	1.24734	1.99913	0.84119
P13036	fecA	Fe(3+) dicitrate transport protein FecA OS=Escherichia coli (strain K12) GN=fecA PE=1 SV=2 - [FECA_ECOLI]	1.78845						0.544989	1.01221	1.14928	1.03707	1.37109
P15028	fecB	Fe(3+) dicitrate-binding periplasmic protein OS=Escherichia coli (strain K12) GN=fecB PE=3 SV=3 - [FECB_ECOLI]	0.988981
P23485	fecR	Protein FecR OS=Escherichia coli (strain K12) GN=fecR PE=4 SV=1 - [FECR_ECOLI]		0.293361	0.174846	0.404114	0.355958	0.261861
P0AEL3	feoA	Ferrous iron transport protein A OS=Escherichia coli (strain K12) GN=feoA PE=1 SV=1 - [FEOA_ECOLI]	0.911639	0.423046	0.450328	0.284407	0.123658	0.404581
P33650	feoB	Ferrous iron transport protein B OS=Escherichia coli (strain K12) GN=feoB PE=1 SV=1 - [FEOB_ECOLI]	0.811505	1.04365	0.74804	0.563558	0.346167	0.744941
P64638	feoC	Ferrous iron transport protein C OS=Escherichia coli (strain K12) GN=feoC PE=1 SV=1 - [FEOC_ECOLI]	1.03391	0.882093	0.860231	0.472958	0.185182	0.633022
P05825	fepA	Ferrienterobactin receptor OS=Escherichia coli (strain K12) GN=fepA PE=1 SV=2 - [FEPA_ECOLI]	0.50277	0.164654	0.097728	0.136823	0.0887739	0.102433	0.643762	0.567663	0.584025	0.380001	1.66049
P0AEL6	fepB	Ferrienterobactin-binding periplasmic protein OS=Escherichia coli (strain K12) GN=fepB PE=1 SV=1 - [FEPB_ECOLI]	0.822821	0.43867	0.287451	0.52472	0.262614	0.396207
P13039	fes	Enterochelin esterase OS=Escherichia coli (strain K12) GN=fes PE=1 SV=1 - [FES_ECOLI]	0.883625	0.486011	0.312789	0.551784	0.275636	0.404745
P0AGD7	ffh	Signal recognition particle protein OS=Escherichia coli (strain K12) GN=ffh PE=1 SV=1 - [SRP54_ECOLI]	1.51237	0.921055	0.56245	1.15675	0.511024	0.661901	0.540386	1.90134	1.6851	1.82846	0.808733
P02672	FGA	*CON* Fibrinogen alpha chain OS=Bos taurus GN=FGA PE=1 SV=5 - [FIBA_BOVIN]		0.752019	0.602048	1.11158	0.809867	0.556266
P06971	fhuA	Ferrichrome-iron receptor OS=Escherichia coli (strain K12) GN=fhuA PE=1 SV=2 - [FHUA_ECOLI]	0.709334	0.909712	0.403351	0.936352	0.525727	0.515496	0.700807	1.29279	1.59888	1.13139	0.988548
P06972	fhuB	Iron(3+)-hydroxamate import system permease protein FhuB OS=Escherichia coli (strain K12) GN=fhuB PE=1 SV=2 - [FHUB_ECOLI]		0.490529	0.19603	0.366073	0.215409	0.278227
P07821	fhuC	Iron(3+)-hydroxamate import ATP-binding protein FhuC OS=Escherichia coli (strain K12) GN=fhuC PE=1 SV=3 - [FHUC_ECOLI]	1.34325	0.483665	0.353652	0.443505	0.184152	0.364098
P07822	fhuD	Iron(3+)-hydroxamate-binding protein FhuD OS=Escherichia coli (strain K12) GN=fhuD PE=1 SV=3 - [FHUD_ECOLI]		0.832291	0.531695	0.952068	0.451055	0.895344
P16869	fhuE	FhuE receptor OS=Escherichia coli (strain K12) GN=fhuE PE=1 SV=2 - [FHUE_ECOLI]	0.623843	0.185757	0.178596	0.38453	0.300695	0.294819	0.893073	2.64123	2.57259	1.23237	3.12879
P39405	fhuF	Ferric iron reductase protein FhuF OS=Escherichia coli (strain K12) GN=fhuF PE=1 SV=1 - [FHUF_ECOLI]	1.34876	0.551819	1.35657	0.325653	0.175278	0.530997	0.546823	2.64926	2.5964	2.12435	1.18279
P20605	fic	Probable adenosine monophosphate-protein transferase fic OS=Escherichia coli (strain K12) GN=fic PE=1 SV=1 - [FIC_ECOLI]	2.28962						0.786439	2.5742	2.00407	3.86603	1.18909
P04128	fimA	Type-1 fimbrial protein, A chain OS=Escherichia coli (strain K12) GN=fimA PE=1 SV=2 - [FIMA1_ECOLI]		0.0785617	0.076656	0.0628362	0.115292	0.0898454
P31697	fimC	Chaperone protein FimC OS=Escherichia coli (strain K12) GN=fimC PE=1 SV=3 - [FIMC_ECOLI]	0.67907	0.339425	0.525449	0.222034	0.0945506	0.464747	0.258307	3.29774	1.83393	1.97969	0.871718
P30130	fimD	Outer membrane usher protein FimD OS=Escherichia coli (strain K12) GN=fimD PE=1 SV=2 - [FIMD_ECOLI]	0.64366	0.471424	0.483705	0.407388	0.239659	0.537763
P08191	fimH	Protein FimH OS=Escherichia coli (strain K12) GN=fimH PE=1 SV=2 - [FIMH_ECOLI]		0.513807	0.474609	0.497423	0.323476	0.477526
P0A6R3	fis	DNA-binding protein fis OS=Escherichia coli (strain K12) GN=fis PE=1 SV=1 - [FIS_ECOLI]	0.790719	0.733778	0.764852	0.986097	0.585135	0.997914
P75780	fiu	Catecholate siderophore receptor Fiu OS=Escherichia coli (strain K12) GN=fiu PE=1 SV=1 - [FIU_ECOLI]	0.565897	0.200174	0.128049	0.219697	0.110154	0.206603	2.25375	0.957912	2.06162	0.87395	2.17482
P0A9L3	fklB	FKBP-type 22 kDa peptidyl-prolyl cis-trans isomerase OS=Escherichia coli (strain K12) GN=fklB PE=1 SV=2 - [FKBB_ECOLI]	1.45815	0.792921	0.526005	1.22878	0.48336	0.673323	0.437697	2.20846	2.15539	2.05291	1.50091
P45523	fkpA	FKBP-type peptidyl-prolyl cis-trans isomerase FkpA OS=Escherichia coli (strain K12) GN=fkpA PE=1 SV=1 - [FKBA_ECOLI]	1.01635	1.09993	0.564421	1.37118	0.524063	0.837854	0.287834	1.88314	1.66255	2.00903	1.34558
P0AEM0	fkpB	FKBP-type 16 kDa peptidyl-prolyl cis-trans isomerase OS=Escherichia coli (strain K12) GN=fkpB PE=1 SV=2 - [FKBX_ECOLI]	1.22308	0.894241	0.565479	1.33701	0.506371	0.862295
P61949	fldA	Flavodoxin-1 OS=Escherichia coli (strain K12) GN=fldA PE=1 SV=2 - [FLAV_ECOLI]	1.25795	1.10442	0.734071	1.59472	0.668325	0.63138	0.553823	2.37274	1.95257	2.30708	0.955877
P0ABY4	fldB	Flavodoxin-2 OS=Escherichia coli (strain K12) GN=fldB PE=3 SV=1 - [FLAW_ECOLI]	0.961668	2.16898	1.39043	2.68112	1.30923	0.8744
P20930	FLG	*CON* Filaggrin OS=Homo sapiens GN=FLG PE=1 SV=3 - [FILA_HUMAN]							0.62502	2.00836	1.86034	1.67607	0.764932
P75933	flgA	Flagella basal body P-ring formation protein FlgA OS=Escherichia coli (strain K12) GN=flgA PE=3 SV=1 - [FLGA_ECOLI]	1.55048
P0ABW9	flgB	Flagellar basal body rod protein FlgB OS=Escherichia coli (strain K12) GN=flgB PE=3 SV=2 - [FLGB_ECOLI]		0.83617	0.948026	0.942532	0.550505	0.670165
P75936	flgD	Basal-body rod modification protein FlgD OS=Escherichia coli (strain K12) GN=flgD PE=3 SV=1 - [FLGD_ECOLI]	0.279239
P75937	flgE	Flagellar hook protein FlgE OS=Escherichia coli (strain K12) GN=flgE PE=3 SV=3 - [FLGE_ECOLI]	0.304972	0.269259	1.51566	0.305832	0.162253	0.938764
P75938	flgF	Flagellar basal-body rod protein FlgF OS=Escherichia coli (strain K12) GN=flgF PE=3 SV=1 - [FLGF_ECOLI]	0.530216
P0A6S0	flgH	Flagellar L-ring protein OS=Escherichia coli (strain K12) GN=flgH PE=3 SV=1 - [FLGH_ECOLI]	0.310374	0.631739	0.38895	0.545381	0.173196	0.879427
P0A6S3	flgI	Flagellar P-ring protein OS=Escherichia coli (strain K12) GN=flgI PE=3 SV=1 - [FLGI_ECOLI]	0.388254
P33235	flgK	Flagellar hook-associated protein 1 OS=Escherichia coli (strain K12) GN=flgK PE=3 SV=3 - [FLGK_ECOLI]	0.294186	0.432043	0.586894	0.489938	0.307706	0.937594
P29744	flgL	Flagellar hook-associated protein 3 OS=Escherichia coli (strain K12) GN=flgL PE=1 SV=2 - [FLGL_ECOLI]	0.288687	0.254934	0.552102	0.257758	0.211741	0.821821
P0AEM4	flgM	Negative regulator of flagellin synthesis OS=Escherichia coli (strain K12) GN=flgM PE=1 SV=1 - [FLGM_ECOLI]	0.913404	0.58534	0.420832	0.71877	0.331349	0.855249	0.46992	2.58183	2.8461	3.86415	1.92331
P43533	flgN	Flagella synthesis protein FlgN OS=Escherichia coli (strain K12) GN=flgN PE=3 SV=2 - [FLGN_ECOLI]	0.525304	0.55733	0.856675	0.35123		1.66804
P76298	flhA	Flagellar biosynthesis protein FlhA OS=Escherichia coli (strain K12) GN=flhA PE=1 SV=1 - [FLHA_ECOLI]	1.03627	0.583757	0.365289	0.923574	0.389581	0.78486
P0AEM6	fliA	RNA polymerase sigma factor for flagellar operon OS=Escherichia coli (strain K12) GN=fliA PE=1 SV=1 - [FLIA_ECOLI]	0.423815	0.643117	0.522621	0.517958	0.10092	0.663232	0.618535	2.34049	2.33309	3.11317	1.31641
P04949	fliC	Flagellin OS=Escherichia coli (strain K12) GN=fliC PE=1 SV=2 - [FLIC_ECOLI]	0.345727	0.264581	0.845504	0.20717	0.129349	1.08852	1.02185	4.19288	8.15241	14.9738	5.27974
P24216	fliD	Flagellar hook-associated protein 2 OS=Escherichia coli (strain K12) GN=fliD PE=1 SV=5 - [FLID_ECOLI]	0.429071	0.453291	1.32665	0.543974	0.182319	1.40163
P25798	fliF	Flagellar M-ring protein OS=Escherichia coli (strain K12) GN=fliF PE=3 SV=3 - [FLIF_ECOLI]	0.368942
P0ABZ1	fliG	Flagellar motor switch protein FliG OS=Escherichia coli (strain K12) GN=fliG PE=1 SV=1 - [FLIG_ECOLI]	0.23871	0.530231	0.6461	0.404357	0.386168	1.02767	1.12471	1.90651	2.16633	3.04991	2.42413
P31068	fliH	Flagellar assembly protein FliH OS=Escherichia coli (strain K12) GN=fliH PE=3 SV=3 - [FLIH_ECOLI]	0.275427
P52613	fliJ	Flagellar FliJ protein OS=Escherichia coli (strain K12) GN=fliJ PE=3 SV=2 - [FLIJ_ECOLI]	0.258921	0.369991	0.978269	1.45339	1.85399	0.458733
P52614	fliK	Flagellar hook-length control protein OS=Escherichia coli (strain K12) GN=fliK PE=3 SV=1 - [FLIK_ECOLI]	0.722013
P0ABX8	fliL	Flagellar protein FliL OS=Escherichia coli (strain K12) GN=fliL PE=3 SV=1 - [FLIL_ECOLI]	0.433214	0.456355	0.362728	0.393479	0.126087	0.772282
P06974	fliM	Flagellar motor switch protein FliM OS=Escherichia coli (strain K12) GN=fliM PE=1 SV=1 - [FLIM_ECOLI]		0.366878	0.278562	0.441999	0.139654	0.770689
P15070	fliN	Flagellar motor switch protein FliN OS=Escherichia coli (strain K12) GN=fliN PE=1 SV=1 - [FLIN_ECOLI]	0.219327	0.601579	0.680338	0.383849	0.0187628	1.04621	1.42301	1.98559	2.22259	2.92667	3.19058
P26608	fliS	Flagellar protein FliS OS=Escherichia coli (strain K12) GN=fliS PE=3 SV=1 - [FLIS_ECOLI]	0.20279	0.286637	0.513213	0.422034	0.229243	1.32521
P0ABY2	fliT	Flagellar protein FliT OS=Escherichia coli (strain K12) GN=fliT PE=3 SV=1 - [FLIT_ECOLI]	0.526374
P0AEM9	fliY	Cystine-binding periplasmic protein OS=Escherichia coli (strain K12) GN=fliY PE=1 SV=1 - [FLIY_ECOLI]	0.848127	0.712531	0.408531	1.0078	0.460164	0.850072	0.269041	1.61446	1.07166	1.37658	1.35427
P15286	flk	Flagellar regulator flk OS=Escherichia coli (strain K12) GN=flk PE=3 SV=2 - [FLK_ECOLI]	1.22496	1.12919	0.658618	1.61251	1.02829	0.929907
P39180	flu	Antigen 43 OS=Escherichia coli (strain K12) GN=flu PE=1 SV=3 - [AG43_ECOLI]	0.980119	0.611438	1.46067	0.838109	0.446069	0.561549	0.368512	1.96704	2.04868	1.56111	1.15195
P77609	flxA	Protein FlxA OS=Escherichia coli (strain K12) GN=flxA PE=4 SV=1 - [FLXA_ECOLI]	0.179702
P23882	fmt	Methionyl-tRNA formyltransferase OS=Escherichia coli (strain K12) GN=fmt PE=1 SV=4 - [FMT_ECOLI]	1.69051	0.8526	0.430787	1.26089	0.802266	0.649618	0.356215	1.22746	1.24171	1.22358	0.804911
P0A9E5	fnr	Fumarate and nitrate reduction regulatory protein OS=Escherichia coli (strain K12) GN=fnr PE=1 SV=1 - [FNR_ECOLI]	1.17039	0.785647	0.579548	1.14347	0.548478	0.802763	0.552662	2.41795	2.22515	2.63008	1.22399
P0AC23	focA	Probable formate transporter 1 OS=Escherichia coli (strain K12) GN=focA PE=1 SV=1 - [FOCA_ECOLI]		1.50254	1.0313	1.15862	0.425339	2.12026	0.81188	3.77389	1.66701	3.31028	1.04982
P0ABQ4	folA	Dihydrofolate reductase OS=Escherichia coli (strain K12) GN=folA PE=1 SV=1 - [DYR_ECOLI]	2.50885	0.0180821	0.0165966	0.0195774	0.0189589	0.0244051	0.0240567	0.0819165	0.0784216	0.0454823	0.0518219
P0AC16	folB	Dihydroneopterin aldolase OS=Escherichia coli (strain K12) GN=folB PE=1 SV=1 - [FOLB_ECOLI]	1.30388
P08192	folC	Bifunctional protein FolC OS=Escherichia coli (strain K12) GN=folC PE=1 SV=2 - [FOLC_ECOLI]	1.58161	0.928583	0.558982	1.53137	1.10535	0.724843
P24186	folD	Bifunctional protein FolD OS=Escherichia coli (strain K12) GN=folD PE=1 SV=4 - [FOLD_ECOLI]	1.61593	0.952462	0.453487	1.85847	1.22035	0.761139	0.318517	1.21727	1.3784	1.30797	0.840324
P0A6T5	folE	GTP cyclohydrolase 1 OS=Escherichia coli (strain K12) GN=folE PE=1 SV=2 - [GCH1_ECOLI]	0.753182	0.883655	0.565457	1.264	0.500638	1.06748
P26281	folK	2-amino-4-hydroxy-6-hydroxymethyldihydropteridine pyrophosphokinase OS=Escherichia coli (strain K12) GN=folK PE=1 SV=3 - [HPPK_ECOLI]		0.67377	0.433378	0.744872	0.486692	0.67678	0.437358	1.15776	1.21603	1.17843	1.30249
P0AFS3	folM	Dihydrofolate reductase FolM OS=Escherichia coli (strain K12) GN=folM PE=1 SV=1 - [FOLM_ECOLI]	1.2101	1.00527	0.545501	1.11085	0.565744	0.8082
P0AC13	folP	Dihydropteroate synthase OS=Escherichia coli (strain K12) GN=folP PE=1 SV=1 - [DHPS_ECOLI]	1.28003	0.83546	0.530374	1.32929	0.859264	0.809134	0.681922	1.78818	2.1691	2.15776	1.32144
P0AC19	folX	D-erythro-7,8-dihydroneopterin triphosphate epimerase OS=Escherichia coli (strain K12) GN=folX PE=1 SV=2 - [FOLX_ECOLI]	1.17883	0.823068	0.467667	0.896775	0.588498	0.710736	0.408488	0.979016	1.20405	0.944719	0.66548
P28861	fpr	Ferredoxin--NADP reductase OS=Escherichia coli (strain K12) GN=fpr PE=1 SV=4 - [FENR_ECOLI]	1.61
P00363	frdA	Fumarate reductase flavoprotein subunit OS=Escherichia coli (strain K12) GN=frdA PE=1 SV=3 - [FRDA_ECOLI]	1.13316	0.922356	0.706828	1.68485	0.809334	1.23328	0.311059	3.12443	2.21781	3.79517	1.09266
P0AC47	frdB	Fumarate reductase iron-sulfur subunit OS=Escherichia coli (strain K12) GN=frdB PE=1 SV=2 - [FRDB_ECOLI]	1.08216	1.01865	0.835568	1.5331	0.648766	1.29067	0.472245	1.89202	1.99184	1.72817	0.91276
P0A8Q0	frdC	Fumarate reductase subunit C OS=Escherichia coli (strain K12) GN=frdC PE=1 SV=1 - [FRDC_ECOLI]	1.30028	1.15148	0.813152	1.47752	0.526822	1.2622
P0A8Q3	frdD	Fumarate reductase subunit D OS=Escherichia coli (strain K12) GN=frdD PE=1 SV=1 - [FRDD_ECOLI]		0.837415	0.524069	1.03144	0.617438	0.839748
P0AEN1	fre	NAD(P)H-flavin reductase OS=Escherichia coli (strain K12) GN=fre PE=1 SV=2 - [FRE_ECOLI]	1.92271	0.971795	0.488038	1.51217	0.944437	0.603725	0.464664	1.64787	1.31377	1.33401	0.693005
P45544	frlR	HTH-type transcriptional regulator FrlR OS=Escherichia coli (strain K12) GN=frlR PE=1 SV=2 - [FRLR_ECOLI]	1.75198	1.3312	0.966765	1.58928	1.01405	1.1813	0.419317	2.20482	1.75201	2.28133	0.962629
P25437	frmA	S-(hydroxymethyl)glutathione dehydrogenase OS=Escherichia coli (strain K12) GN=frmA PE=1 SV=3 - [FRMA_ECOLI]	1.21999	0.926075	0.534091	1.09112	0.696847	0.761992	0.738374	2.80591	2.45052	3.0467	0.593508
P51025	frmB	S-formylglutathione hydrolase FrmB OS=Escherichia coli (strain K12) GN=frmB PE=1 SV=2 - [SFGH1_ECOLI]	0.894501	0.914932	0.763155	0.962987	0.551519	1.03843
P0AAP3	frmR	Transcriptional repressor FrmR OS=Escherichia coli (strain K12) GN=frmR PE=1 SV=1 - [FRMR_ECOLI]	1.2326						0.403031	1.31447	1.29148	1.26846	1.32838
P0A805	frr	Ribosome-recycling factor OS=Escherichia coli (strain K12) GN=frr PE=1 SV=1 - [RRF_ECOLI]	0.958792	0.712123	0.498266	0.964666	0.605637	0.754311	0.350625	1.53257	1.36067	2.00505	0.936102
P04335	frsA	Esterase FrsA OS=Escherichia coli (strain K12) GN=frsA PE=3 SV=2 - [FRSA_ECOLI]	2.37284	0.9485	0.453392	1.49222	1.55476	0.704279	0.454271	1.72453	1.58733	1.38794	0.771797
P20966	fruA	PTS system fructose-specific EIIBC component OS=Escherichia coli (strain K12) GN=fruA PE=4 SV=1 - [PTFBC_ECOLI]		0.692251	0.468773	0.474123	0.216265	0.925889
P69811	fruB	Multiphosphoryl transfer protein OS=Escherichia coli (strain K12) GN=fruB PE=1 SV=1 - [PTFAH_ECOLI]	0.921334	0.693788	0.592057	0.418362	0.159929	0.787878	0.712528	1.99568	2.2458	2.18524	1.09171
P0AEW9	fruK	1-phosphofructokinase OS=Escherichia coli (strain K12) GN=fruK PE=3 SV=1 - [K1PF_ECOLI]		0.748806	0.462715	1.34852	1.2034	1.13139
P69816	frwB	Fructose-like phosphotransferase enzyme IIB component 2 OS=Escherichia coli (strain K12) GN=frwB PE=3 SV=1 - [PTFB2_ECOLI]		1.02133	0.465855	1.30871	0.93645	0.676347
P78055	fsaA	Fructose-6-phosphate aldolase 1 OS=Escherichia coli (strain K12) GN=fsaA PE=1 SV=2 - [FSAA_ECOLI]		0.855924	0.481026	0.761787	0.273704	0.760954	2.55244	1.33734	1.06243	1.2355	1.25049
P0A998	ftnA	Ferritin-1 OS=Escherichia coli (strain K12) GN=ftnA PE=1 SV=1 - [FTNA_ECOLI]	1.31578	1.85869	0.551143	0.777898	0.174577	0.905769	0.741645	3.14778	0.822228	3.28971	0.430166
P0A9A2	ftnB	Ferritin-like protein 2 OS=Escherichia coli (strain K12) GN=ftnB PE=3 SV=1 - [FTNB_ECOLI]	1.06157						0.449038	10.916	4.02183	10.8664	1.66339
P0ABH0	ftsA	Cell division protein FtsA OS=Escherichia coli (strain K12) GN=ftsA PE=3 SV=1 - [FTSA_ECOLI]	1.53903	0.782683	0.477475	1.11409	0.752328	0.751292	0.231323	1.89925	1.48768	1.16677	0.898152
P0A6S5	ftsB	Cell division protein FtsB OS=Escherichia coli (strain K12) GN=ftsB PE=1 SV=1 - [FTSB_ECOLI]	1.15579
P0A9R7	ftsE	Cell division ATP-binding protein FtsE OS=Escherichia coli (strain K12) GN=ftsE PE=1 SV=1 - [FTSE_ECOLI]	2.79539	0.925305	0.546604	1.18263	0.858053	0.902269
P0AAI3	ftsH	ATP-dependent zinc metalloprotease FtsH OS=Escherichia coli (strain K12) GN=ftsH PE=1 SV=1 - [FTSH_ECOLI]	1.09844	0.855797	0.619348	0.821285	0.373712	0.940079	0.619544	1.48631	1.55416	2.81761	1.00401
P0AD68	ftsI	Peptidoglycan synthase FtsI OS=Escherichia coli (strain K12) GN=ftsI PE=1 SV=1 - [FTSI_ECOLI]	1.65342
P46889	ftsK	DNA translocase FtsK OS=Escherichia coli (strain K12) GN=ftsK PE=1 SV=2 - [FTSK_ECOLI]	0.505824	0.508368	0.446142	0.76473	0.413685	0.528603	0.100114	1.30139	0.97471	1.23208	0.919966
P0AEN4	ftsL	Cell division protein FtsL OS=Escherichia coli (strain K12) GN=ftsL PE=1 SV=1 - [FTSL_ECOLI]	1.32111	0.764144	0.555934	0.994842	0.588148	0.696776
P29131	ftsN	Cell division protein FtsN OS=Escherichia coli (strain K12) GN=ftsN PE=1 SV=3 - [FTSN_ECOLI]	1.96667						0.468467	1.82743	1.64778	1.87901	0.950446
P26648	ftsP	Cell division protein FtsP OS=Escherichia coli (strain K12) GN=ftsP PE=1 SV=2 - [FTSP_ECOLI]	1.19696	0.962495	0.472432	1.25568	0.894464	0.729959	0.170179	1.33739	1.20381	1.30005	0.694421
P06136	ftsQ	Cell division protein FtsQ OS=Escherichia coli (strain K12) GN=ftsQ PE=1 SV=1 - [FTSQ_ECOLI]	1.17821	0.931948	0.504936	0.837566	0.383772	0.76674
P0AC30	ftsX	Cell division protein FtsX OS=Escherichia coli (strain K12) GN=ftsX PE=1 SV=1 - [FTSX_ECOLI]		1.17184	0.643581	1.12274	0.481614	1.20576
P10121	ftsY	Signal recognition particle receptor FtsY OS=Escherichia coli (strain K12) GN=ftsY PE=1 SV=1 - [FTSY_ECOLI]	1.48508	0.799807	0.458496	1.16746	0.801205	0.696692	0.481367	2.07731	1.78032	2.70917	0.900012
P0A9A6	ftsZ	Cell division protein FtsZ OS=Escherichia coli (strain K12) GN=ftsZ PE=1 SV=1 - [FTSZ_ECOLI]	2.17706	0.878882	0.637698	1.23386	0.688486	0.837867	0.28477	1.78311	1.28908	1.30657	0.780615
P69922	fucI	L-fucose isomerase OS=Escherichia coli (strain K12) GN=fucI PE=1 SV=1 - [FUCI_ECOLI]							0.498062	1.28709	1.26288	2.1109	0.784545
P0A9S1	fucO	Lactaldehyde reductase OS=Escherichia coli (strain K12) GN=fucO PE=1 SV=2 - [FUCO_ECOLI]	1.35258	1.09904	0.514968	1.48292	0.678468	0.815219	0.312104	1.51404	1.36588	1.62859	0.758093
P0ACK8	fucR	L-fucose operon activator OS=Escherichia coli (strain K12) GN=fucR PE=4 SV=1 - [FUCR_ECOLI]		1.15978	0.728456	2.36833	0.878681	0.75069
P0AEN8	fucU	L-fucose mutarotase OS=Escherichia coli (strain K12) GN=fucU PE=1 SV=1 - [FUCM_ECOLI]	0.764631	1.03827	0.474647	1.01383	0.605166	0.581873
P0AC33	fumA	Fumarate hydratase class I, aerobic OS=Escherichia coli (strain K12) GN=fumA PE=1 SV=2 - [FUMA_ECOLI]	1.47088	0.826141	0.397948	1.2003	0.757766	0.806663	0.290799	0.787818	1.15001	0.865188	0.628012
P14407	fumB	Fumarate hydratase class I, anaerobic OS=Escherichia coli (strain K12) GN=fumB PE=1 SV=2 - [FUMB_ECOLI]	0.760838	0.953198	0.640393	1.77629	0.890561	1.64575	0.573202	2.86438	2.95365	3.64475	1.89079
P05042	fumC	Fumarate hydratase class II OS=Escherichia coli (strain K12) GN=fumC PE=1 SV=1 - [FUMC_ECOLI]	0.726671	0.958897	0.589224	1.04404	0.564685	1.09257	0.817214	1.6331	1.95436	1.71902	1.32248
P0A9A9	fur	Ferric uptake regulation protein OS=Escherichia coli (strain K12) GN=fur PE=1 SV=1 - [FUR_ECOLI]	1.18844	0.860476	0.597108	1.07663	0.503959	0.772279	0.486076	1.8862	1.8437	2.0476	1.01543
P0A6M8	fusA	Elongation factor G OS=Escherichia coli (strain K12) GN=fusA PE=1 SV=2 - [EFG_ECOLI]	1.1593	0.763868	0.430855	1.05503	0.725282	0.727092	0.453005	1.24673	1.27019	1.25993	0.893439
P37147	fxsA	UPF0716 protein FxsA OS=Escherichia coli (strain K12) GN=fxsA PE=1 SV=2 - [FXSA_ECOLI]	1.04706
P25526	gabD	Succinate-semialdehyde dehydrogenase [NADP(+)] GabD OS=Escherichia coli (strain K12) GN=gabD PE=1 SV=1 - [GABD_ECOLI]	0.881612	1.27645	0.394087	1.17368	0.635752	0.756812	0.442959	0.883526	0.683472	0.665812	0.809651
P22256	gabT	4-aminobutyrate aminotransferase GabT OS=Escherichia coli (strain K12) GN=gabT PE=1 SV=1 - [GABT_ECOLI]	1.10981	0.794501	0.263854	0.948173	0.550761	0.600682	0.513083	0.773581	0.633247	0.537505	0.640162
P69908	gadA	Glutamate decarboxylase alpha OS=Escherichia coli (strain K12) GN=gadA PE=1 SV=1 - [DCEA_ECOLI]	1.5609	1.30284	1.59809	1.1616	1.31504	0.497061	0.206574	1.87894	0.818909	0.971588	0.275887
P69910	gadB	Glutamate decarboxylase beta OS=Escherichia coli (strain K12) GN=gadB PE=1 SV=1 - [DCEB_ECOLI]	2.48506	1.19146	1.13282	0.880557	0.763085	0.450527
P63235	gadC	Probable glutamate/gamma-aminobutyrate antiporter OS=Escherichia coli (strain K12) GN=gadC PE=1 SV=1 - [GADC_ECOLI]	2.18949	1.17702	0.916481	1.52442	1.71595	0.671442	0.262798	1.7625	0.933683	1.03064	0.467254
P09147	galE	UDP-glucose 4-epimerase OS=Escherichia coli (strain K12) GN=galE PE=1 SV=1 - [GALE_ECOLI]	3.1494	0.918296	0.459995	1.2054	0.794605	0.485433	0.220741	1.29441	0.949331	0.954045	0.438939
P0AAB6	galF	UTP--glucose-1-phosphate uridylyltransferase OS=Escherichia coli (strain K12) GN=galF PE=1 SV=1 - [GALF_ECOLI]	1.42127	0.815839	0.446015	0.975182	0.703315	0.71216	0.381549	1.15391	1.20684	1.1915	0.921707
P0A6T3	galK	Galactokinase OS=Escherichia coli (strain K12) GN=galK PE=1 SV=2 - [GAL1_ECOLI]	2.06615	1.04808	0.467679	1.25339	0.689468	0.557484	0.230779	1.07475	0.992232	0.738701	0.481717
P0A9C3	galM	Aldose 1-epimerase OS=Escherichia coli (strain K12) GN=galM PE=1 SV=1 - [GALM_ECOLI]	1.28537	0.849655	0.476061	0.912481	0.438438	0.63666	0.186441	1.07052	0.807349	1.0045	0.590083
P0AEP1	galP	Galactose-proton symporter OS=Escherichia coli (strain K12) GN=galP PE=1 SV=1 - [GALP_ECOLI]	1.14	0.962426	0.470319	0.707189	0.362707	0.587184
P03024	galR	HTH-type transcriptional regulator GalR OS=Escherichia coli (strain K12) GN=galR PE=1 SV=1 - [GALR_ECOLI]	0.744314
P09148	galT	Galactose-1-phosphate uridylyltransferase OS=Escherichia coli (strain K12) GN=galT PE=1 SV=2 - [GAL7_ECOLI]	2.60145	1.27607	0.464031	1.53908	0.779172	0.62601	0.198851	1.2844	0.943424	0.826255	0.328932
P0AEP3	galU	UTP--glucose-1-phosphate uridylyltransferase OS=Escherichia coli (strain K12) GN=galU PE=1 SV=2 - [GALU_ECOLI]	1.26015	0.798285	0.419955	0.858261	0.506925	0.613043	3.09942	7.21554	6.83572	7.5379	0.937779
P0A9B2	gapA	Glyceraldehyde-3-phosphate dehydrogenase A OS=Escherichia coli (strain K12) GN=gapA PE=1 SV=2 - [G3P1_ECOLI]	0.461823	0.76542	0.547643	0.984391	0.59247	0.886583	0.400872	1.52364	1.35697	1.47523	1.17473
P33898	gapC	Putative glyceraldehyde-3-phosphate dehydrogenase C OS=Escherichia coli (strain K12) GN=gapC PE=5 SV=2 - [G3P3_ECOLI]	0.054944
P39829	garD	D-galactarate dehydratase OS=Escherichia coli (strain K12) GN=garD PE=1 SV=2 - [GARD_ECOLI]	0.876422	0.900722	0.463131	6.71783	1.47584	1.25341
P23522	garL	5-keto-4-deoxy-D-glucarate aldolase OS=Escherichia coli (strain K12) GN=garL PE=1 SV=2 - [GARL_ECOLI]		0.683325	0.268236	0.830575	0.618085	0.544021
P0ABQ2	garR	2-hydroxy-3-oxopropionate reductase OS=Escherichia coli (strain K12) GN=garR PE=1 SV=1 - [GARR_ECOLI]	1.20306	0.969869	0.461913	1.12881	0.604772	0.603417
P69828	gatA	Galactitol-specific phosphotransferase enzyme IIA component OS=Escherichia coli (strain K12) GN=gatA PE=4 SV=1 - [PTKA_ECOLI]	1.83279	0.598158	0.321788	0.913331	0.441636	0.79268	0.427082	1.97157	1.40699	1.58264	1.08738
P37188	gatB	Galactitol-specific phosphotransferase enzyme IIB component OS=Escherichia coli (strain K12) GN=gatB PE=1 SV=2 - [PTKB_ECOLI]	1.91707	0.848675	0.580369	0.930472	0.436303	1.48435	5.04884	18.9846	21.8711	16.7079	1.95017
P69831	gatC	Galactitol permease IIC component OS=Escherichia coli (strain K12) GN=gatC PE=1 SV=1 - [PTKC_ECOLI]	1.08099	0.720765	0.399343	0.667112	0.382849	0.978324
P0A9S3	gatD	Galactitol-1-phosphate 5-dehydrogenase OS=Escherichia coli (strain K12) GN=gatD PE=1 SV=1 - [GATD_ECOLI]	1.29013	0.948534	0.494672	1.01264	0.414258	0.894914	0.614594	3.47068	5.77135	1.65666	0.975239
P0C8J6	gatY	D-tagatose-1,6-bisphosphate aldolase subunit GatY OS=Escherichia coli (strain K12) GN=gatY PE=1 SV=1 - [GATY_ECOLI]	2.10564	0.752326	0.625643	1.40347	0.585162	1.13021	0.697097	5.42462	4.83015	3.45514	1.42649
P0C8J8	gatZ	D-tagatose-1,6-bisphosphate aldolase subunit GatZ OS=Escherichia coli (strain K12) GN=gatZ PE=1 SV=1 - [GATZ_ECOLI]	1.42654	0.706201	0.487589	1.14718	0.683245	1.07337	0.470948	3.22077	3.90365	2.83974	1.335
Q3MHN5	GC	*CON* Vitamin D-binding protein OS=Bos taurus GN=GC PE=2 SV=1 - [VTDB_BOVIN]		0.441624	0.172133	1.00646	0.572772	0.368252
P15877	gcd	Quinoprotein glucose dehydrogenase OS=Escherichia coli (strain K12) GN=gcd PE=1 SV=3 - [DHG_ECOLI]	1.16619	0.648505	0.452039	0.709564	0.48521	0.805562
P0A9F6	gcvA	Glycine cleavage system transcriptional activator OS=Escherichia coli (strain K12) GN=gcvA PE=1 SV=1 - [GCVA_ECOLI]	1.25062	1.53064	0.895878	1.84774	1.24296	1.22966	0.358319	1.27239	1.11954	1.17026	0.739661
P0A6T9	gcvH	Glycine cleavage system H protein OS=Escherichia coli (strain K12) GN=gcvH PE=1 SV=2 - [GCSH_ECOLI]	0.694693	0.321136	0.367463	0.649902	0.33634	0.26388	0.479122	2.53041	1.85798	2.51653	1.86736
P33195	gcvP	Glycine dehydrogenase [decarboxylating] OS=Escherichia coli (strain K12) GN=gcvP PE=1 SV=3 - [GCSP_ECOLI]	0.606933	0.866865	0.631002	1.21722	0.770949	1.24285	0.582414	2.3184	2.12953	2.2845	1.34953
P0A9I3	gcvR	Glycine cleavage system transcriptional repressor OS=Escherichia coli (strain K12) GN=gcvR PE=1 SV=2 - [GCVR_ECOLI]	1.46056	1.79536	0.993238	1.94765	0.731586	1.30562
P27248	gcvT	Aminomethyltransferase OS=Escherichia coli (strain K12) GN=gcvT PE=1 SV=3 - [GCST_ECOLI]	0.534865	0.925774	0.653879	1.6799	1.08524	1.0291	0.240447	1.78951	1.71951	1.70521	1.32577
P00370	gdhA	NADP-specific glutamate dehydrogenase OS=Escherichia coli (strain K12) GN=gdhA PE=1 SV=1 - [DHE4_ECOLI]	0.540182	0.42895	0.445973	0.465815	0.255894	1.33854	0.972241	1.76686	1.51186	2.44682	2.46042
P0A932	gfcE	Putative polysaccharide export protein GfcE OS=Escherichia coli (strain K12) GN=gfcE PE=3 SV=1 - [GFCE_ECOLI]		0.562365	0.307256	0.513251	0.387946	0.518	0.52409	2.27064	1.91686	2.14338	0.976434
P42212	GFP	*CON* Green fluorescent protein OS=Aequorea victoria GN=GFP PE=1 SV=1 - [GFP_AEQVI]		1.29536	0.47304	2.69875	1.002	0.637027
P18956	ggt	Gamma-glutamyltranspeptidase OS=Escherichia coli (strain K12) GN=ggt PE=1 SV=1 - [GGT_ECOLI]	1.51129	0.858577	0.379035	1.0256	0.576466	0.919549	0.723647	1.18506	1.77538	1.5844	1.8347
P75913	ghrA	Glyoxylate/hydroxypyruvate reductase A OS=Escherichia coli (strain K12) GN=ghrA PE=1 SV=2 - [GHRA_ECOLI]	1.10822	0.765234	0.424385	0.830032	0.478199	0.632842	1.36259	4.85757	4.31303	4.6734	0.660094
P37666	ghrB	Glyoxylate/hydroxypyruvate reductase B OS=Escherichia coli (strain K12) GN=ghrB PE=1 SV=3 - [GHRB_ECOLI]	2.05592	0.909077	0.416018	1.40014	0.957577	0.647475	0.418436	1.67941	1.74834	1.89046	0.859661
P37330	glcB	Malate synthase G OS=Escherichia coli (strain K12) GN=glcB PE=1 SV=3 - [MASZ_ECOLI]	1.10737	1.00205	0.478566	0.942244	0.528205	0.888926	0.306392	0.854444	0.700298	1.62376	0.709175
P0ACL5	glcC	Glc operon transcriptional activator OS=Escherichia coli (strain K12) GN=glcC PE=4 SV=1 - [GLCC_ECOLI]	2.9454
P0AEQ1	glcG	Protein GlcG OS=Escherichia coli (strain K12) GN=glcG PE=3 SV=1 - [GLCG_ECOLI]							0.184149	0.960463	0.871085	1.0831	1.117
P0A9S5	gldA	Glycerol dehydrogenase OS=Escherichia coli (strain K12) GN=gldA PE=1 SV=1 - [GLDA_ECOLI]		1.22355	0.782489	0.735678	0.256089	1.39048	0.538745	1.74876	1.46484	1.65673	0.844119
P37747	glf	UDP-galactopyranose mutase OS=Escherichia coli (strain K12) GN=glf PE=1 SV=1 - [GLF_ECOLI]	0.909614	0.724978	0.583417	1.06626	0.624365	0.991314	0.563709	1.7287	1.67133	1.65647	1.13289
P07762	glgB	1,4-alpha-glucan branching enzyme GlgB OS=Escherichia coli (strain K12) GN=glgB PE=1 SV=1 - [GLGB_ECOLI]		0.885378	0.34554	0.795105	0.345069	0.651344
P0A6V1	glgC	Glucose-1-phosphate adenylyltransferase OS=Escherichia coli (strain K12) GN=glgC PE=1 SV=2 - [GLGC_ECOLI]	0.58458	1.13749	0.617743	0.950748	0.375349	0.822125	0.553972	1.41035	0.964994	1.17121	1.08999
P0AC86	glgP	Glycogen phosphorylase OS=Escherichia coli (strain K12) GN=glgP PE=3 SV=1 - [PHSG_ECOLI]	2.3463	0.865274	0.40305	0.741235	0.275116	0.724479	0.36426	1.09706	1.22333	1.15832	0.648591
P26649	glgS	Glycogen synthesis protein GlgS OS=Escherichia coli (strain K12) GN=glgS PE=1 SV=1 - [GLGS_ECOLI]	0.669567
P15067	glgX	Glycogen debranching enzyme OS=Escherichia coli (strain K12) GN=glgX PE=1 SV=3 - [GLGX_ECOLI]	1.66515	1.02347	0.53662	1.02383	0.644171	0.920304	0.479292	1.51597	1.48035	1.53199	1.08715
P0A6V8	glk	Glucokinase OS=Escherichia coli (strain K12) GN=glk PE=1 SV=1 - [GLK_ECOLI]	1.65968	1.185	0.622751	1.85066	1.2045	1.21197	0.564231	1.7696	1.96068	1.71176	0.926546
P31120	glmM	Phosphoglucosamine mutase OS=Escherichia coli (strain K12) GN=glmM PE=1 SV=3 - [GLMM_ECOLI]	0.918827	0.528406	0.360395	0.573039	0.434964	0.53058	0.433022	1.67022	1.42963	1.51594	0.857283
P17169	glmS	Glutamine--fructose-6-phosphate aminotransferase [isomerizing] OS=Escherichia coli (strain K12) GN=glmS PE=1 SV=4 - [GLMS_ECOLI]	0.84581	1.02666	0.526762	1.25808	0.707696	0.787785	0.517885	1.48333	1.57246	1.90503	0.861255
P0ACC7	glmU	Bifunctional protein GlmU OS=Escherichia coli (strain K12) GN=glmU PE=1 SV=1 - [GLMU_ECOLI]	1.21272	0.867304	0.450778	0.955059	0.434659	0.782593
P0A9C5	glnA	Glutamine synthetase OS=Escherichia coli (strain K12) GN=glnA PE=1 SV=2 - [GLNA_ECOLI]	0.616895	0.48967	0.359761	0.394392	0.144513	0.749333	0.299247	1.79484	1.27936	1.81883	0.582979
P0A9Z1	glnB	Nitrogen regulatory protein P-II 1 OS=Escherichia coli (strain K12) GN=glnB PE=1 SV=1 - [GLNB_ECOLI]	1.05943	0.973933	0.527134	1.19019	0.575992	0.768977	0.369907	1.27232	1.0829	1.44046	0.756338
P27249	glnD	[Protein-PII] uridylyltransferase OS=Escherichia coli (strain K12) GN=glnD PE=3 SV=2 - [GLND_ECOLI]	1.40996	0.96965	0.463515	1.08804	0.763196	0.765063
P30870	glnE	Glutamate-ammonia-ligase adenylyltransferase OS=Escherichia coli (strain K12) GN=glnE PE=1 SV=2 - [GLNE_ECOLI]		0.773935	0.347586	0.919203	0.613622	0.550406
P0AFB8	glnG	Nitrogen regulation protein NR(I) OS=Escherichia coli (strain K12) GN=glnG PE=3 SV=1 - [NTRC_ECOLI]	1.97946	0.731244	0.338978	0.906602	0.600166	0.75596
P0AEQ3	glnH	Glutamine-binding periplasmic protein OS=Escherichia coli (strain K12) GN=glnH PE=1 SV=1 - [GLNH_ECOLI]	0.572985	0.540446	0.417853	0.455742	0.269227	0.583617	0.227016	1.32456	1.17692	1.47723	0.924806
P0AC55	glnK	Nitrogen regulatory protein P-II 2 OS=Escherichia coli (strain K12) GN=glnK PE=1 SV=1 - [GLNK_ECOLI]		0.163243	0.107425	0.223957	0.118223	0.26633
P10346	glnQ	Glutamine transport ATP-binding protein GlnQ OS=Escherichia coli (strain K12) GN=glnQ PE=1 SV=1 - [GLNQ_ECOLI]	0.77874	0.541971	0.459024	0.599949	0.385607	0.639608	0.712126	1.8876	1.70278	2.68232	1.64956
P00962	glnS	Glutamine--tRNA ligase OS=Escherichia coli (strain K12) GN=glnS PE=1 SV=3 - [SYQ_ECOLI]	1.16976	0.883423	0.589804	1.09358	0.66698	0.84923	0.371312	1.26226	1.32556	1.37396	0.906619
P0AC81	gloA	Lactoylglutathione lyase OS=Escherichia coli (strain K12) GN=gloA PE=1 SV=1 - [LGUL_ECOLI]	1.30358	0.877794	0.425733	1.16133	0.527671	0.618304	0.43698	2.41294	1.90217	2.48736	0.838983
P0AC84	gloB	Hydroxyacylglutathione hydrolase OS=Escherichia coli (strain K12) GN=gloB PE=1 SV=1 - [GLO2_ECOLI]	1.56523	0.865832	0.476049	0.872287	0.491564	0.729021
P0A9C0	glpA	Anaerobic glycerol-3-phosphate dehydrogenase subunit A OS=Escherichia coli (strain K12) GN=glpA PE=1 SV=1 - [GLPA_ECOLI]		1.13006	0.531563	3.89061	2.61368	0.672295
P13035	glpD	Aerobic glycerol-3-phosphate dehydrogenase OS=Escherichia coli (strain K12) GN=glpD PE=1 SV=3 - [GLPD_ECOLI]		0.936523	0.449774	1.54457	1.42125	0.794957
P0AER0	glpF	Glycerol uptake facilitator protein OS=Escherichia coli (strain K12) GN=glpF PE=1 SV=1 - [GLPF_ECOLI]	1.14972
P09391	glpG	Rhomboid protease GlpG OS=Escherichia coli (strain K12) GN=glpG PE=1 SV=5 - [GLPG_ECOLI]	2.0699	0.658351	0.267431	0.712316	0.631353	0.472747	0.506526	1.68972	1.49105	1.55469	1.05437
P0A6F3	glpK	Glycerol kinase OS=Escherichia coli (strain K12) GN=glpK PE=1 SV=2 - [GLPK_ECOLI]	1.50886	0.959797	0.401516	1.52868	1.12405	0.743904	0.390429	1.06395	1.1536	1.05532	0.780271
P09394	glpQ	Glycerophosphoryl diester phosphodiesterase OS=Escherichia coli (strain K12) GN=glpQ PE=1 SV=2 - [GLPQ_ECOLI]	0.995101
P0ACL0	glpR	Glycerol-3-phosphate regulon repressor OS=Escherichia coli (strain K12) GN=glpR PE=1 SV=1 - [GLPR_ECOLI]	1.36551	0.739767	0.391132	0.811374	0.426205	0.537204
P08194	glpT	Glycerol-3-phosphate transporter OS=Escherichia coli (strain K12) GN=glpT PE=1 SV=1 - [GLPT_ECOLI]		1.31665	0.562853	3.10012	1.81528	1.18143
P0A9C9	glpX	Fructose-1,6-bisphosphatase 1 class 2 OS=Escherichia coli (strain K12) GN=glpX PE=1 SV=1 - [GLPX_ECOLI]	1.8448	0.868082	0.50004	1.93693	1.60236	0.804015	0.689627	1.55127	1.81819	1.62054	0.798709
P0AFU4	glrR	Transcriptional regulatory protein GlrR OS=Escherichia coli (strain K12) GN=glrR PE=1 SV=1 - [GLRR_ECOLI]	1.49987	0.973476	0.445914	1.42766	0.912372	0.802117
P77454	glsA1	Glutaminase 1 OS=Escherichia coli (strain K12) GN=glsA1 PE=1 SV=1 - [GLSA1_ECOLI]	2.45915	1.19078	0.577186	1.16465	1.21581	0.495301
P0A6W0	glsA2	Glutaminase 2 OS=Escherichia coli (strain K12) GN=glsA2 PE=1 SV=1 - [GLSA2_ECOLI]	1.19928	0.605986	0.266559	0.841039	0.785337	0.4358
P0ABH7	gltA	Citrate synthase OS=Escherichia coli (strain K12) GN=gltA PE=1 SV=1 - [CISY_ECOLI]	0.804909	0.826225	0.252176	0.461369	0.227904	0.645147	0.448978	0.777892	0.997595	1.30961	0.810124
P09831	gltB	Glutamate synthase [NADPH] large chain OS=Escherichia coli (strain K12) GN=gltB PE=1 SV=3 - [GLTB_ECOLI]	0.621134	0.986131	0.595198	0.581088	0.226119	1.22027	0.64082	1.8496	1.52784	1.96837	0.831568
P09832	gltD	Glutamate synthase [NADPH] small chain OS=Escherichia coli (strain K12) GN=gltD PE=1 SV=3 - [GLTD_ECOLI]	0.558735	0.993962	0.490354	0.601486	0.28533	1.15231	0.472613	2.22858	1.64853	2.34632	1.03094
P37902	gltI	Glutamate/aspartate periplasmic-binding protein OS=Escherichia coli (strain K12) GN=gltI PE=1 SV=2 - [GLTI_ECOLI]	0.928794	1.10096	0.374812	1.11664	0.556451	0.693379	0.36129	1.39282	1.23027	1.45448	1.08085
P0AER3	gltJ	Glutamate/aspartate transport system permease protein GltJ OS=Escherichia coli (strain K12) GN=gltJ PE=3 SV=1 - [GLTJ_ECOLI]	0.911871
P0AAG3	gltL	Glutamate/aspartate transport ATP-binding protein GltL OS=Escherichia coli (strain K12) GN=gltL PE=3 SV=1 - [GLTL_ECOLI]	1.75712	1.10783	1.05568	1.21928	0.668978	1.52114	0.469055	2.40214	1.9889	2.97912	3.35154
P0AER8	gltS	Sodium/glutamate symport carrier protein OS=Escherichia coli (strain K12) GN=gltS PE=1 SV=1 - [GLTS_ECOLI]		0.964563	0.267962	0.843113	0.658019	0.34821
P04805	gltX	Glutamate--tRNA ligase OS=Escherichia coli (strain K12) GN=gltX PE=1 SV=1 - [SYE_ECOLI]	1.18413	0.74005	0.461491	1.14923	0.803089	0.709849	0.462109	1.49201	1.65669	1.66262	0.966709
P27305	gluQ	Glutamyl-Q tRNA(Asp) synthetase OS=Escherichia coli (strain K12) GN=gluQ PE=1 SV=6 - [GLUQ_ECOLI]	1.27471	0.2709	0.125545	0.783239	1.09258	0.480597	0.352466	1.00383	1.01582	0.938915	0.804049
P77364	glxK	Glycerate kinase OS=Escherichia coli (strain K12) GN=glxK PE=1 SV=1 - [GLXK2_ECOLI]	1.44778	0.921705	0.532181	1.19639	0.658343	0.795214	0.455622	1.18884	1.26357	1.20458	1.05532
P0A825	glyA	Serine hydroxymethyltransferase OS=Escherichia coli (strain K12) GN=glyA PE=1 SV=1 - [GLYA_ECOLI]	2.27398	1.02013	0.4734	2.17843	1.31594	0.733405	0.403643	1.35601	1.50731	1.18269	0.837494
P00960	glyQ	Glycine--tRNA ligase alpha subunit OS=Escherichia coli (strain K12) GN=glyQ PE=1 SV=2 - [SYGA_ECOLI]	1.96871	1.00203	0.595271	1.54548	1.54182	0.923568	0.353287	0.995073	1.13865	1.20852	0.871098
P00961	glyS	Glycine--tRNA ligase beta subunit OS=Escherichia coli (strain K12) GN=glyS PE=1 SV=4 - [SYGB_ECOLI]	1.78704	0.957909	0.394037	1.34927	0.825361	0.669332	0.485856	1.51641	1.31301	1.3102	0.892147
P63224	gmhA	Phosphoheptose isomerase OS=Escherichia coli (strain K12) GN=gmhA PE=1 SV=1 - [GMHA_ECOLI]	1.10608	0.813196	0.496338	0.957774	0.479547	0.828172	0.42668	1.377	1.31463	1.41661	1.01563
P63228	gmhB	D,D-heptose 1,7-bisphosphate phosphatase OS=Escherichia coli (strain K12) GN=gmhB PE=1 SV=1 - [GMHB_ECOLI]	1.47843	1.58923	1.10324	2.80519	2.03124	1.87711
P60546	gmk	Guanylate kinase OS=Escherichia coli (strain K12) GN=gmk PE=1 SV=1 - [KGUA_ECOLI]	2.20323	0.701726	0.376365	1.26256	0.779532	0.655486
P77334	gmr	Cyclic di-GMP phosphodiesterase Gmr OS=Escherichia coli (strain K12) GN=gmr PE=1 SV=1 - [GMR_ECOLI]	1.79773	0.67626	0.434817	0.913675	0.461198	0.863423
P00350	gnd	6-phosphogluconate dehydrogenase, decarboxylating OS=Escherichia coli (strain K12) GN=gnd PE=1 SV=2 - [6PGD_ECOLI]	1.07247	0.83443	0.506271	1.20128	0.740539	0.75883	0.440869	1.25318	1.32774	1.2746	0.853233
P0AC92	gnsA	Protein GnsA OS=Escherichia coli (strain K12) GN=gnsA PE=3 SV=1 - [GNSA_ECOLI]	1.06033	0.594484	0.417903	0.459077	0.163462	0.544197
P77695	gnsB	Protein GnsB OS=Escherichia coli (strain K12) GN=gnsB PE=3 SV=2 - [GNSB_ECOLI]	1.67537	0.587131	0.479624	0.666671	0.416289	0.742207	0.513613	1.59029	1.42695	1.7909	0.961258
P46859	gntK	Thermoresistant gluconokinase OS=Escherichia coli (strain K12) GN=gntK PE=1 SV=4 - [GNTK_ECOLI]	0.929798
P0ACP5	gntR	HTH-type transcriptional regulator GntR OS=Escherichia coli (strain K12) GN=gntR PE=1 SV=1 - [GNTR_ECOLI]	1.87317
P06715	gor	Glutathione reductase OS=Escherichia coli (strain K12) GN=gor PE=1 SV=1 - [GSHR_ECOLI]	1.74622	0.898182	0.535884	1.54018	1.21482	0.775447	1.30383	4.29315	4.5242	4.28241	0.793539
P32662	gph	Phosphoglycolate phosphatase OS=Escherichia coli (strain K12) GN=gph PE=1 SV=1 - [GPH_ECOLI]	2.00865	0.811318	0.486135	1.02312	0.542825	0.64775		1.04379	0.997555	1.38089	0.948269
P62707	gpmA	2,3-bisphosphoglycerate-dependent phosphoglycerate mutase OS=Escherichia coli (strain K12) GN=gpmA PE=1 SV=2 - [GPMA_ECOLI]	1.54924	0.696567	0.380047	0.923692	0.60539	0.52232	0.377666	0.79212	0.838873	0.728337	0.970378
P0A7A2	gpmB	Probable phosphoglycerate mutase GpmB OS=Escherichia coli (strain K12) GN=gpmB PE=3 SV=1 - [GPMB_ECOLI]	0.945088	0.815059	0.639601	1.19536	0.831117	0.939751	0.215921	1.32332	1.22775	1.27046	0.884311
P37689	gpmI	2,3-bisphosphoglycerate-independent phosphoglycerate mutase OS=Escherichia coli (strain K12) GN=gpmI PE=1 SV=1 - [GPMI_ECOLI]	2.33425	1.0836	0.665819	2.10903	1.49835	1.09448	0.496033	1.84763	1.89991	1.62767	1.05963
P25552	gppA	Guanosine-5'-triphosphate,3'-diphosphate pyrophosphatase OS=Escherichia coli (strain K12) GN=gppA PE=1 SV=3 - [GPPA_ECOLI]	0.762977	0.908495	0.483273	1.45021	0.982774	0.873714
Q46851	gpr	L-glyceraldehyde 3-phosphate reductase OS=Escherichia coli (strain K12) GN=gpr PE=1 SV=1 - [GPR_ECOLI]		1.22907	0.587394	1.4158	0.586401	0.861612
P0A6S7	gpsA	Glycerol-3-phosphate dehydrogenase [NAD(P)+] OS=Escherichia coli (strain K12) GN=gpsA PE=3 SV=1 - [GPDA_ECOLI]	1.65809	0.818218	0.365071	1.03353	0.808282	0.672321	0.262323	0.945204	1.03084	0.879476	0.650095
P0A9M5	gpt	Xanthine phosphoribosyltransferase OS=Escherichia coli (strain K12) GN=gpt PE=1 SV=1 - [XGPT_ECOLI]	1.05997	1.11381	0.691238	1.31109	1.09189	0.813456
P68066	grcA	Autonomous glycyl radical cofactor OS=Escherichia coli (strain K12) GN=grcA PE=1 SV=1 - [GRCA_ECOLI]	1.09158	0.99432	0.712601	0.786188	0.376384	1.13174	0.200479	2.36093	1.12899	2.62395	1.65199
P0A6W5	greA	Transcription elongation factor GreA OS=Escherichia coli (strain K12) GN=greA PE=1 SV=1 - [GREA_ECOLI]	1.16277	0.927655	0.562091	1.20445	0.493614	0.834028	0.598172	4.10809	3.09184	5.53685	1.12989
P30128	greB	Transcription elongation factor GreB OS=Escherichia coli (strain K12) GN=greB PE=1 SV=2 - [GREB_ECOLI]	1.53453	1.57442	0.774837	1.45758	0.780696	1.13797
P0A6F5	groL	60 kDa chaperonin OS=Escherichia coli (strain K12) GN=groL PE=1 SV=2 - [CH60_ECOLI]	1.30527	0.882612	0.87907	0.744634	0.277448	0.835167	0.350288	2.64925	1.43138	2.00617	0.725813
P0A6F9	groS	10 kDa chaperonin OS=Escherichia coli (strain K12) GN=groS PE=1 SV=1 - [CH10_ECOLI]	1.1555	0.736079	0.607725	1.00564	0.49459	0.599833	0.207028	1.68346	1.12734	1.639	0.888571
P09372	grpE	Protein GrpE OS=Escherichia coli (strain K12) GN=grpE PE=1 SV=1 - [GRPE_ECOLI]	0.947435	0.94312	0.744283	0.954257	0.378164	0.593948	0.432882	1.69114	1.45711	1.67172	0.899157
P68688	grxA	Glutaredoxin-1 OS=Escherichia coli (strain K12) GN=grxA PE=1 SV=1 - [GLRX1_ECOLI]	1.11938	1.30501	0.87903	1.31729	0.585257	1.32113	0.362682	3.08308	2.56268	3.25039	1.43794
P0AC59	grxB	Glutaredoxin-2 OS=Escherichia coli (strain K12) GN=grxB PE=1 SV=1 - [GLRX2_ECOLI]	1.93983	1.13417	0.549584	1.8487	1.23341	0.735595	0.349986	1.15074	1.07798	1.21821	0.695778
P0AC62	grxC	Glutaredoxin-3 OS=Escherichia coli (strain K12) GN=grxC PE=1 SV=2 - [GLRX3_ECOLI]	3.10287	1.41651	0.729511	1.70188	0.593547	0.903807
P0AC69	grxD	Glutaredoxin-4 OS=Escherichia coli (strain K12) GN=grxD PE=1 SV=1 - [GLRX4_ECOLI]	1.58252	1.00314	0.729019	1.0736	0.510673	0.639554	0.677781	1.90529	1.39262	1.79329	1.04673
P0A6W9	gshA	Glutamate--cysteine ligase OS=Escherichia coli (strain K12) GN=gshA PE=1 SV=1 - [GSH1_ECOLI]	1.42658	0.834256	0.521131	1.11785	0.735933	0.739548	0.363107	1.09895	1.07804	1.10149	0.697938
P04425	gshB	Glutathione synthetase OS=Escherichia coli (strain K12) GN=gshB PE=1 SV=1 - [GSHB_ECOLI]	0.965188	0.820624	0.654146	0.978485	0.561308	0.868718	3.86332	9.99567	10.4063	8.30014	0.757177
P75797	gsiB	Glutathione-binding protein GsiB OS=Escherichia coli (strain K12) GN=gsiB PE=1 SV=1 - [GSIB_ECOLI]	1.24711	0.647985	0.366235	0.869965	0.600803	0.744096	0.384541	1.25384	0.980336	1.13623	1.10728
P0AEW6	gsk	Inosine-guanosine kinase OS=Escherichia coli (strain K12) GN=gsk PE=1 SV=1 - [INGK_ECOLI]	0.89957	0.881072	0.509824	1.16447	0.839096	0.934755
P06396	GSN	*CON* Gelsolin OS=Homo sapiens GN=GSN PE=1 SV=1 - [GELS_HUMAN]		0.33016	0.259784	1.37793	1.01359	0.556176	0.348851	0.4928	1.27448	1.0633	0.489511
P03825	gspB	Putative general secretion pathway protein B OS=Escherichia coli (strain K12) GN=gspB PE=2 SV=2 - [GSPB_ECOLI]	0.911839
P0AES0	gss	Bifunctional glutathionylspermidine synthetase/amidase OS=Escherichia coli (strain K12) GN=gsp PE=1 SV=1 - [GSP_ECOLI]	1.03262	0.95205	0.505417	0.94353	0.663272	0.768193	0.391037	1.5256	1.24519	1.33298	0.865452
P0A9D2	gstA	Glutathione S-transferase GstA OS=Escherichia coli (strain K12) GN=gstA PE=1 SV=1 - [GSTA_ECOLI]	1.61756	0.849836	0.456419	0.999987	0.783613	0.695633	0.509627	2.2052	1.71615	1.8112	1.0566
P0ACA7	gstB	Glutathione S-transferase GstB OS=Escherichia coli (strain K12) GN=gstB PE=1 SV=1 - [GSTB_ECOLI]	2.04441	0.838958	0.379899	1.02436	0.741939	0.648714
P04079	guaA	GMP synthase [glutamine-hydrolyzing] OS=Escherichia coli (strain K12) GN=guaA PE=1 SV=1 - [GUAA_ECOLI]	1.34796	0.940172	0.45283	1.87972	1.33918	0.747043	0.457948	1.31041	1.64594	1.23937	0.806818
P0ADG7	guaB	Inosine-5'-monophosphate dehydrogenase OS=Escherichia coli (strain K12) GN=guaB PE=1 SV=1 - [IMDH_ECOLI]	2.20095	1.38808	0.821922	1.82425	0.557239	1.20319	0.624376	1.56345	1.42343	1.46107	0.769712
P60560	guaC	GMP reductase OS=Escherichia coli (strain K12) GN=guaC PE=1 SV=1 - [GUAC_ECOLI]	0.524813	0.782993	0.512731	0.717726	0.294112	0.809257	0.0887944	1.77253	1.10131	1.24921	0.551768
P76641	guaD	Guanine deaminase OS=Escherichia coli (strain K12) GN=guaD PE=1 SV=1 - [GUAD_ECOLI]	0.518187	0.776318	0.421144	0.629202	0.344404	0.761984
P0AES2	gudD	Glucarate dehydratase OS=Escherichia coli (strain K12) GN=gudD PE=1 SV=2 - [GUDD_ECOLI]							0.476315	1.55986	1.23749	1.35994	0.934687
Q46915	gudX	Glucarate dehydratase-related protein OS=Escherichia coli (strain K12) GN=gudX PE=1 SV=1 - [GUDX_ECOLI]	1.22746
P17115	gutQ	Arabinose 5-phosphate isomerase GutQ OS=Escherichia coli (strain K12) GN=gutQ PE=1 SV=3 - [GUTQ_ECOLI]	0.804568	0.796166	0.477195	0.961245	0.51415	0.778619	0.386618	1.34264	1.28346	1.28908	0.892369
P0AES4	gyrA	DNA gyrase subunit A OS=Escherichia coli (strain K12) GN=gyrA PE=1 SV=1 - [GYRA_ECOLI]	0.648504	0.85282	0.558063	0.622471	0.243976	0.922396
P0AES6	gyrB	DNA gyrase subunit B OS=Escherichia coli (strain K12) GN=gyrB PE=1 SV=2 - [GYRB_ECOLI]	1.69775	1.04853	0.558387	1.29387	0.572738	0.902795	0.424345	1.36719	1.62442	1.13818	0.754902
Q47141	hcaR	Hca operon transcriptional activator OS=Escherichia coli (strain K12) GN=hcaR PE=1 SV=2 - [HCAR_ECOLI]	1.66439
Q47142	hcaT	Probable 3-phenylpropionic acid transporter OS=Escherichia coli (strain K12) GN=hcaT PE=1 SV=2 - [HCAT_ECOLI]		1.87897	1.07724	2.36794	1.29387	1.47255
P31658	hchA	Molecular chaperone Hsp31 and glyoxalase 3 OS=Escherichia coli (strain K12) GN=hchA PE=1 SV=3 - [HCHA_ECOLI]	2.09352	1.21807	0.419208	1.12626	0.840422	0.509886	0.235039	0.628384	0.371657	0.524296	0.417944
P75824	hcr	NADH oxidoreductase hcr OS=Escherichia coli (strain K12) GN=hcr PE=1 SV=3 - [HCR_ECOLI]		1.43327	0.911346	1.18623	0.359175	1.56184
P69931	hda	DnaA-homolog protein hda OS=Escherichia coli (strain K12) GN=hda PE=1 SV=2 - [HDA_ECOLI]	1.77995	0.776031	0.408199	1.19575	1.26308	0.669777
P0AES9	hdeA	Acid stress chaperone HdeA OS=Escherichia coli (strain K12) GN=hdeA PE=1 SV=1 - [HDEA_ECOLI]	8.9491	2.14723	3.50672	2.08669	0.91641	0.53648	0.168992	3.07072	1.97507	1.89154	0.824916
P0AET2	hdeB	Acid stress chaperone HdeB OS=Escherichia coli (strain K12) GN=hdeB PE=1 SV=1 - [HDEB_ECOLI]	5.09801	2.67984	4.69332	1.49725	0.767251	0.496882	0.374731	3.31995	1.98039	2.08636	0.85189
P0AET5	hdeD	Protein HdeD OS=Escherichia coli (strain K12) GN=hdeD PE=1 SV=1 - [HDED_ECOLI]	8.16093	2.33213	1.84766	2.90728	3.58296	0.528789
P0AET8	hdhA	7-alpha-hydroxysteroid dehydrogenase OS=Escherichia coli (strain K12) GN=hdhA PE=1 SV=1 - [HDHA_ECOLI]	1.88681	0.79946	0.421401	0.701594	0.469711	0.379695	0.211757	0.915797	0.673696	0.87374	0.555138
P15038	helD	Helicase IV OS=Escherichia coli (strain K12) GN=helD PE=1 SV=2 - [HELD_ECOLI]		0.7964	0.355132	0.590997	0.450519	0.685898
P0A6X1	hemA	Glutamyl-tRNA reductase OS=Escherichia coli (strain K12) GN=hemA PE=1 SV=1 - [HEM1_ECOLI]							0.593205	2.28097	1.5461	1.94193	1.1664
P0ACB2	hemB	Delta-aminolevulinic acid dehydratase OS=Escherichia coli (strain K12) GN=hemB PE=1 SV=2 - [HEM2_ECOLI]	0.646645	1.18369	1.05897	0.945091	0.40408	0.835879	0.398326	1.96869	1.36361	1.78843	0.789383
P06983	hemC	Porphobilinogen deaminase OS=Escherichia coli (strain K12) GN=hemC PE=1 SV=2 - [HEM3_ECOLI]	1.48784	0.830948	0.513734	1.33116	0.769969	0.831687	0.430958	1.18201	1.42238	1.21581	1.00642
P09126	hemD	Uroporphyrinogen-III synthase OS=Escherichia coli (strain K12) GN=hemD PE=3 SV=1 - [HEM4_ECOLI]	1.85603	0.858842	0.656032	1.42658	1.10545	0.949872	0.438761	1.63451	1.57693	1.66375	0.967017
P29680	hemE	Uroporphyrinogen decarboxylase OS=Escherichia coli (strain K12) GN=hemE PE=3 SV=3 - [DCUP_ECOLI]	1.8529	1.0019	0.571874	1.51731	0.954941	0.824827	0.471218	1.68304	1.89429	2.28685	0.955058
P36553	hemF	Coproporphyrinogen-III oxidase, aerobic OS=Escherichia coli (strain K12) GN=hemF PE=1 SV=1 - [HEM6_ECOLI]	1.24344	0.715531	0.454144	0.836708	0.556731	0.735368
P0ACB4	hemG	Protoporphyrinogen IX dehydrogenase [menaquinone] OS=Escherichia coli (strain K12) GN=hemG PE=1 SV=1 - [HEMG_ECOLI]	0.97699	0.984389	0.379595	1.4483	1.01886	0.674695
P23871	hemH	Ferrochelatase OS=Escherichia coli (strain K12) GN=hemH PE=1 SV=3 - [HEMH_ECOLI]	1.13829	0.633658	0.450721	0.804003	0.547699	0.59812
P23893	hemL	Glutamate-1-semialdehyde 2,1-aminomutase OS=Escherichia coli (strain K12) GN=hemL PE=1 SV=2 - [GSA_ECOLI]	2.04776	0.846797	0.476395	1.14909	0.859272	0.77221	0.391609	1.3992	1.49337	1.44262	0.962758
P32131	hemN	Oxygen-independent coproporphyrinogen-III oxidase OS=Escherichia coli (strain K12) GN=hemN PE=1 SV=4 - [HEMN_ECOLI]	1.91312	0.948766	0.591935	1.43013	1.11063	0.837572	0.379724	1.64769	1.50009	1.62968	0.707373
P09127	hemX	Putative uroporphyrinogen-III C-methyltransferase OS=Escherichia coli (strain K12) GN=hemX PE=1 SV=1 - [HEMX_ECOLI]	0.880124	0.78482	0.413154	0.740014	0.386134	0.644201	0.51837	1.01985	1.28023	1.02691	0.620667
P0ACB7	hemY	Protein HemY OS=Escherichia coli (strain K12) GN=hemY PE=1 SV=1 - [HEMY_ECOLI]	1.42337	0.940531	0.48107	0.765177	0.288896	0.604936	0.523045	1.18267	1.23416	1.30621	0.66693
P0ABC3	hflC	Modulator of FtsH protease HflC OS=Escherichia coli (strain K12) GN=hflC PE=1 SV=1 - [HFLC_ECOLI]	1.09458	0.738297	0.398819	0.778799	0.454785	0.756763	0.526428	1.78997	1.45603	1.92713	0.790958
P25746	hflD	High frequency lysogenization protein HflD OS=Escherichia coli (strain K12) GN=hflD PE=1 SV=1 - [HFLD_ECOLI]	1.55745	0.994744	0.546713	1.12924	0.856685	0.76584
P0ABC7	hflK	Modulator of FtsH protease HflK OS=Escherichia coli (strain K12) GN=hflK PE=1 SV=1 - [HFLK_ECOLI]	1.2449	0.924292	0.485435	0.772288	0.450777	1.07943	0.405652	1.99466	1.47495	2.24497	1.12559
P25519	hflX	GTPase HflX OS=Escherichia coli (strain K12) GN=hflX PE=1 SV=3 - [HFLX_ECOLI]	1.75754	1.01642	0.456951	1.31486	0.915936	0.740993	0.350421	1.0419	0.819532	0.84309	0.561341
P0ACE3	hha	Hemolysin expression-modulating protein Hha OS=Escherichia coli (strain K12) GN=hha PE=1 SV=1 - [HHA_ECOLI]	1.62849	1.39246	3.61009	1.15018	0.499589	2.25891
P67701	higA	Antitoxin HigA OS=Escherichia coli (strain K12) GN=higA PE=1 SV=1 - [HIGA_ECOLI]	2.08934	1.20007	0.65557	1.04129	0.391346	0.617575
P0ACE7	hinT	HIT-like protein HinT OS=Escherichia coli (strain K12) GN=hinT PE=1 SV=1 - [HINT_ECOLI]	1.19231	1.07801	0.60573	0.98827	0.28873	0.62934	0.56641	1.51681	0.888705	1.42608	1.10515
P23874	hipA	Serine/threonine-protein kinase HipA OS=Escherichia coli (strain K12) GN=hipA PE=1 SV=2 - [HIPA_ECOLI]	0.814708	0.800297	0.521945	0.989548	0.573653	0.824192
P10371	hisA	1-(5-phosphoribosyl)-5-[(5-phosphoribosylamino)methylideneamino] imidazole-4-carboxamide isomerase OS=Escherichia coli (strain K12) GN=hisA PE=1 SV=2 - [HIS4_ECOLI]	1.07181	0.639517	0.450189	0.537233	0.360887	0.662811	0.365892	1.39544	1.21792	1.35154	1.07657
P06987	hisB	Histidine biosynthesis bifunctional protein HisB OS=Escherichia coli (strain K12) GN=hisB PE=1 SV=1 - [HIS7_ECOLI]	0.6212	0.79246	0.440093	0.477551	0.271524	0.523055	0.56197	1.73623	1.61799	1.64166	0.673802
P06986	hisC	Histidinol-phosphate aminotransferase OS=Escherichia coli (strain K12) GN=hisC PE=1 SV=2 - [HIS8_ECOLI]	1.1573	0.605737	0.370734	0.466475	0.383928	0.620767	0.627202	1.9271	1.66544	1.66905	0.848669
P06988	hisD	Histidinol dehydrogenase OS=Escherichia coli (strain K12) GN=hisD PE=1 SV=5 - [HISX_ECOLI]	1.09967	0.671132	0.410537	0.525957	0.375651	0.622209	0.422957	1.53539	1.40653	1.42182	1.12446
P60664	hisF	Imidazole glycerol phosphate synthase subunit HisF OS=Escherichia coli (strain K12) GN=hisF PE=1 SV=1 - [HIS6_ECOLI]	1.12733	0.65828	0.449819	0.579023	0.446292	0.646801	0.278298	2.23015	1.89293	2.452	1.3144
P60757	hisG	ATP phosphoribosyltransferase OS=Escherichia coli (strain K12) GN=hisG PE=1 SV=1 - [HIS1_ECOLI]	0.851412	0.580917	0.323558	0.319448	0.229958	0.628848	0.541664	1.48859	1.23385	1.48245	1.19321
P60595	hisH	Imidazole glycerol phosphate synthase subunit HisH OS=Escherichia coli (strain K12) GN=hisH PE=1 SV=1 - [HIS5_ECOLI]	1.31495	0.590554	0.384488	0.520492	0.441327	0.623509	0.100651	1.33436	1.04381	1.46698	1.10449
P06989	hisI	Histidine biosynthesis bifunctional protein HisIE OS=Escherichia coli (strain K12) GN=hisI PE=3 SV=3 - [HIS2_ECOLI]	0.976093	0.737173	0.497485	0.658295	0.284611	0.718992	0.459539	1.54006	1.36479	1.63211	1.14508
P0AEU0	hisJ	Histidine-binding periplasmic protein OS=Escherichia coli (strain K12) GN=hisJ PE=1 SV=1 - [HISJ_ECOLI]	1.12752	0.550335	0.376414	0.286265	0.147646	0.647365	0.204356	1.39544	1.2346	1.40511	1.07291
P07109	hisP	Histidine transport ATP-binding protein HisP OS=Escherichia coli (strain K12) GN=hisP PE=1 SV=2 - [HISP_ECOLI]		0.996304	0.84743	0.777839	0.191064	0.769591	0.421406	1.13751	1.11604	0.913757	0.937772
P60906	hisS	Histidine--tRNA ligase OS=Escherichia coli (strain K12) GN=hisS PE=1 SV=2 - [SYH_ECOLI]	1.4366	0.807806	0.420505	1.08356	0.68737	0.836462	0.631821	1.8415	1.90492	2.10401	1.15593
P67910	hldD	ADP-L-glycero-D-manno-heptose-6-epimerase OS=Escherichia coli (strain K12) GN=hldD PE=1 SV=1 - [HLDD_ECOLI]	0.902293	1.07634	0.520772	0.931159	0.428064	0.774996	0.446829	1.30417	1.2754	1.28149	0.726972
P76658	hldE	Bifunctional protein HldE OS=Escherichia coli (strain K12) GN=hldE PE=1 SV=1 - [HLDE_ECOLI]	0.951394	0.87076	0.536318	0.972483	0.479021	0.759735	0.452436	1.54978	1.2848	1.42477	0.877565
P77335	hlyE	Hemolysin E, chromosomal OS=Escherichia coli (strain K12) GN=hlyE PE=1 SV=4 - [HLYE_ECOLI]	1.01868
P24232	hmp	Flavohemoprotein OS=Escherichia coli (strain K12) GN=hmp PE=1 SV=1 - [HMP_ECOLI]	0.747196	0.804642	0.668896	0.635951	0.306758	0.694667	0.587004	1.895	1.68083	1.95326	1.23366
P0ACF8	hns	DNA-binding protein H-NS OS=Escherichia coli (strain K12) GN=hns PE=1 SV=2 - [HNS_ECOLI]	0.891454	0.937979	0.797088	0.841922	0.284117	1.09885	0.455983	2.6984	2.07875	2.69503	1.79826
P36645	hofB	Protein transport protein HofB homolog OS=Escherichia coli (strain K12) GN=hofB PE=3 SV=3 - [HOFB_ECOLI]	1.0394
P36646	hofC	Protein transport protein HofC homolog OS=Escherichia coli (strain K12) GN=hofC PE=3 SV=3 - [HOFC_ECOLI]							0.480244	1.18178	0.954631	1.32446	1.10043
P34749	hofQ	Putative DNA transport protein HofQ OS=Escherichia coli (strain K12) GN=hofQ PE=3 SV=2 - [HOFQ_ECOLI]	2.30997
P28631	holB	DNA polymerase III subunit delta' OS=Escherichia coli (strain K12) GN=holB PE=1 SV=2 - [HOLB_ECOLI]	1.88782	1.21574	0.640643	1.41833	1.4466	0.677695
P28905	holC	DNA polymerase III subunit chi OS=Escherichia coli (strain K12) GN=holC PE=1 SV=1 - [HOLC_ECOLI]	1.0846	0.634023	0.354678	0.893244	0.605358	0.512523	2.88231	11.985	10.3813	12.5405	0.910316
P28632	holD	DNA polymerase III subunit psi OS=Escherichia coli (strain K12) GN=holD PE=1 SV=1 - [HOLD_ECOLI]	1.55364						0.446033	2.00994	1.77939	1.9549	0.912907
P0ABS8	holE	DNA polymerase III subunit theta OS=Escherichia coli (strain K12) GN=holE PE=1 SV=1 - [HOLE_ECOLI]	1.17449	3.15711	4.78947	3.97555	1.42807	1.54056
P0AFX0	hpf	Ribosome hibernation promoting factor OS=Escherichia coli (strain K12) GN=hpf PE=1 SV=1 - [HPF_ECOLI]	1.16464	1.2905	1.23624	2.37585	1.42839	0.987547
P0A9M2	hpt	Hypoxanthine phosphoribosyltransferase OS=Escherichia coli (strain K12) GN=hpt PE=1 SV=1 - [HPRT_ECOLI]	1.40744	1.07153	0.600103	1.51787	0.754025	0.97134	0.532265	2.34257	2.09118	2.40854	1.12438
P43329	hrpA	ATP-dependent RNA helicase HrpA OS=Escherichia coli (strain K12) GN=hrpA PE=3 SV=3 - [HRPA_ECOLI]		1.09617	0.728948	1.69044	0.410834	2.32184
P37024	hrpB	ATP-dependent RNA helicase HrpB OS=Escherichia coli (strain K12) GN=hrpB PE=3 SV=3 - [HRPB_ECOLI]		0.904815	0.417405	1.01656	0.516415	0.629086
P0A6Z1	hscA	Chaperone protein HscA OS=Escherichia coli (strain K12) GN=hscA PE=1 SV=1 - [HSCA_ECOLI]	1.1064	0.996684	0.583848	1.55933	0.805288	0.835708	0.398585	1.24026	1.43336	1.74957	1.02591
P0A6L9	hscB	Co-chaperone protein HscB OS=Escherichia coli (strain K12) GN=hscB PE=1 SV=1 - [HSCB_ECOLI]	1.31576	0.965797	0.548095	1.79594	0.868482	0.678191
P08957	hsdM	Type I restriction enzyme EcoKI M protein OS=Escherichia coli (strain K12) GN=hsdM PE=1 SV=1 - [T1MK_ECOLI]	1.00975	0.929536	0.509441	1.09	0.598354	0.822704	0.499355	1.59962	1.62032	1.59628	0.835174
P08956	hsdR	Type I restriction enzyme EcoKI R protein OS=Escherichia coli (strain K12) GN=hsdR PE=3 SV=3 - [T1RK_ECOLI]	0.79142	0.8733	0.529255	1.01214	0.555234	0.867092	0.466976	1.22526	1.18697	1.24169	0.776468
P05719	hsdS	Type-1 restriction enzyme EcoKI specificity protein OS=Escherichia coli (strain K12) GN=hsdS PE=1 SV=1 - [T1SK_ECOLI]		0.555401	0.652278	1.52141	1.22803	0.540387	0.648227	3.48776	2.73591	3.76381	1.25182
P52644	hslJ	Heat shock protein HslJ OS=Escherichia coli (strain K12) GN=hslJ PE=1 SV=1 - [HSLJ_ECOLI]	1.92764						0.29384	1.21334	1.00481	1.07628	0.646807
P0A6Y5	hslO	33 kDa chaperonin OS=Escherichia coli (strain K12) GN=hslO PE=1 SV=1 - [HSLO_ECOLI]	1.36831	0.362207	0.1793	0.560198	0.508596	0.216079	0.254609	1.46615	1.11133	1.69462	0.953841
P0ACG8	hslR	Heat shock protein 15 OS=Escherichia coli (strain K12) GN=hslR PE=1 SV=1 - [HSLR_ECOLI]	1.61807						0.301827	1.27682	1.03774	1.10942	0.673497
P0A6H5	hslU	ATP-dependent protease ATPase subunit HslU OS=Escherichia coli (strain K12) GN=hslU PE=1 SV=1 - [HSLU_ECOLI]	1.2026	1.16451	0.806323	1.21045	0.579885	0.848255	0.683888	3.6056	2.57321	3.43323	0.866712
P0A7B8	hslV	ATP-dependent protease subunit HslV OS=Escherichia coli (strain K12) GN=hslV PE=1 SV=2 - [HSLV_ECOLI]	0.630365	0.778562	0.679908	0.480598	0.208373	0.726496	0.408477	1.67266	1.31834	1.72525	0.899455
P0A6Z3	htpG	Chaperone protein HtpG OS=Escherichia coli (strain K12) GN=htpG PE=1 SV=1 - [HTPG_ECOLI]	0.435713	0.878774	0.750116	0.62801	0.324146	0.56385	0.446305	2.18678	1.58406	2.17484	0.663253
P23894	htpX	Protease HtpX OS=Escherichia coli (strain K12) GN=htpX PE=1 SV=1 - [HTPX_ECOLI]	0.764286	0.890192	0.587343	1.11275	0.663998	0.864886	0.449558	1.23811	1.2245	1.42098	1.0094
P0ACF0	hupA	DNA-binding protein HU-alpha OS=Escherichia coli (strain K12) GN=hupA PE=1 SV=1 - [DBHA_ECOLI]	1.90572	0.921812	0.603526	0.954467	0.474494	0.910335	0.316519	1.36676	1.20724	1.89082	0.954253
P0ACF4	hupB	DNA-binding protein HU-beta OS=Escherichia coli (strain K12) GN=hupB PE=1 SV=1 - [DBHB_ECOLI]	2.35109	0.915378	0.637185	1.04041	0.374774	0.951786	0.381728	1.72295	1.45041	1.821	1.25239
P0ACD8	hyaB	Hydrogenase-1 large chain OS=Escherichia coli (strain K12) GN=hyaB PE=1 SV=1 - [MBHL_ECOLI]	1.50154	1.81121	0.85063	1.09062	0.806307	1.51445	0.448481	1.48424	1.27812	1.47939	0.879197
P19931	hyaE	Hydrogenase-1 operon protein HyaE OS=Escherichia coli (strain K12) GN=hyaE PE=1 SV=1 - [HYAE_ECOLI]		0.675868	0.999529	1.16474	1.09944	0.557675
P0ACE0	hybC	Hydrogenase-2 large chain OS=Escherichia coli (strain K12) GN=hybC PE=1 SV=2 - [MBHM_ECOLI]	0.968634	0.86312	0.5968	1.32035	0.94306	1.16083
P37182	hybD	Hydrogenase 2 maturation protease OS=Escherichia coli (strain K12) GN=hybD PE=1 SV=2 - [HYBD_ECOLI]	1.55367	1.05624	0.608976	1.74688	0.715835	0.831034	0.295081	1.9642	1.27672	2.30489	0.994111
P0AEV7	hycH	Formate hydrogenlyase maturation protein HycH OS=Escherichia coli (strain K12) GN=hycH PE=4 SV=1 - [HYCH_ECOLI]	1.93145
P0AEV9	hycI	Hydrogenase 3 maturation protease OS=Escherichia coli (strain K12) GN=hycI PE=1 SV=2 - [HYCI_ECOLI]	0.944086
P0AEW1	hyfE	Hydrogenase-4 component E OS=Escherichia coli (strain K12) GN=hyfE PE=1 SV=1 - [HYFE_ECOLI]							1.50694	7.97273	5.93523	9.53855	1.072
P77423	hyfH	Hydrogenase-4 component H OS=Escherichia coli (strain K12) GN=hyfH PE=4 SV=1 - [HYFH_ECOLI]	5.20633
P0AAN3	hypB	Hydrogenase isoenzymes nickel incorporation protein HypB OS=Escherichia coli (strain K12) GN=hypB PE=1 SV=1 - [HYPB_ECOLI]	1.05996	1.27377	0.946523	3.49344	1.91044	1.74292
P24192	hypD	Hydrogenase isoenzymes formation protein HypD OS=Escherichia coli (strain K12) GN=hypD PE=1 SV=1 - [HYPD_ECOLI]	1.15612	0.895741	0.462551	1.85991	2.19754	1.06978
P24193	hypE	Hydrogenase isoenzymes formation protein HypE OS=Escherichia coli (strain K12) GN=hypE PE=1 SV=2 - [HYPE_ECOLI]	1.70917	0.934646	0.717013	2.03136	0.985721	1.10194	0.454019	2.36294	2.03746	3.78794	0.861102
P30131	hypF	Carbamoyltransferase HypF OS=Escherichia coli (strain K12) GN=hypF PE=1 SV=2 - [HYPF_ECOLI]	1.28902
P37595	iaaA	Isoaspartyl peptidase OS=Escherichia coli (strain K12) GN=iaaA PE=1 SV=2 - [IAAA_ECOLI]	1.1337	0.79573	0.643239	1.06124	0.454382	0.786433	0.370826	1.44345	1.03271	1.4781	0.940519
P39377	iadA	Isoaspartyl dipeptidase OS=Escherichia coli (strain K12) GN=iadA PE=1 SV=1 - [IADA_ECOLI]	1.11445	1.42639	0.770654	0.939182	0.30909	1.63024	0.257418	2.11567	0.873597	2.04143	0.620578
P0C054	ibpA	Small heat shock protein IbpA OS=Escherichia coli (strain K12) GN=ibpA PE=1 SV=1 - [IBPA_ECOLI]	0.935931	0.74964	0.517609	0.644865	0.315596	0.532205	0.49006	3.28547	2.44348	3.23011	0.76565
P0C058	ibpB	Small heat shock protein IbpB OS=Escherichia coli (strain K12) GN=ibpB PE=1 SV=1 - [IBPB_ECOLI]		0.684682	0.686903	0.501064	0.292185	0.608047
P08200	icd	Isocitrate dehydrogenase [NADP] OS=Escherichia coli (strain K12) GN=icd PE=1 SV=1 - [IDH_ECOLI]	1.31749	0.783844	0.326981	0.938654	0.525008	0.673769	0.412491	0.90674	1.07262	0.919212	0.749357
P0A8S1	iciA	Chromosome initiation inhibitor OS=Escherichia coli (strain K12) GN=iciA PE=1 SV=1 - [ICIA_ECOLI]	1.30868	0.750025	0.295768	0.762764	0.698728	0.446389	0.305814	1.18884	1.09233	1.48802	0.836881
Q46822	idi	Isopentenyl-diphosphate Delta-isomerase OS=Escherichia coli (strain K12) GN=idi PE=1 SV=1 - [IDI_ECOLI]	1.44805
P39343	idnR	HTH-type transcriptional regulator IdnR OS=Escherichia coli (strain K12) GN=idnR PE=4 SV=1 - [IDNR_ECOLI]		0.415412	0.258908	0.643533	0.51437	0.888846
P0A6X7	ihfA	Integration host factor subunit alpha OS=Escherichia coli (strain K12) GN=ihfA PE=1 SV=1 - [IHFA_ECOLI]	1.12084	2.13381	1.5888	1.77153	0.863371	1.04144	0.260008	4.242	2.3865	3.96092	1.196
P0A6Y1	ihfB	Integration host factor subunit beta OS=Escherichia coli (strain K12) GN=ihfB PE=1 SV=1 - [IHFB_ECOLI]	1.34034	0.682692	0.408667	0.718567	0.498758	0.650212	0.399687	1.10007	0.879187	1.02184	0.860286
P00956	ileS	Isoleucine--tRNA ligase OS=Escherichia coli (strain K12) GN=ileS PE=1 SV=5 - [SYI_ECOLI]	1.00377	0.925253	0.586136	1.15641	0.668358	0.879177	0.417641	1.53049	1.38289	1.4835	0.850187
P04968	ilvA	L-threonine dehydratase biosynthetic IlvA OS=Escherichia coli (strain K12) GN=ilvA PE=1 SV=1 - [ILVA_ECOLI]	1.67572	0.472272	0.388956	1.13771	0.361243	0.874379
P08142	ilvB	Acetolactate synthase isozyme 1 large subunit OS=Escherichia coli (strain K12) GN=ilvB PE=1 SV=1 - [ILVB_ECOLI]	0.51769	1.0345	0.49008	0.503057	0.27838	1.15104	0.378186	1.26343	0.906313	1.15198	0.924022
P05793	ilvC	Ketol-acid reductoisomerase OS=Escherichia coli (strain K12) GN=ilvC PE=1 SV=4 - [ILVC_ECOLI]	0.613157	1.14073	0.788517	0.773886	0.458537	3.46444	0.674656	3.56808	1.51725	3.42441	3.27888
P05791	ilvD	Dihydroxy-acid dehydratase OS=Escherichia coli (strain K12) GN=ilvD PE=1 SV=5 - [ILVD_ECOLI]	0.895454	0.906552	0.487591	1.05004	0.511586	0.867509	0.476983	1.84583	1.65745	1.85138	1.18547
P0AB80	ilvE	Branched-chain-amino-acid aminotransferase OS=Escherichia coli (strain K12) GN=ilvE PE=1 SV=2 - [ILVE_ECOLI]	0.671574	0.973844	0.509304	0.696107	0.272444	0.991092	0.493418	1.56839	1.25366	1.64723	1.09397
P00894	ilvH	Acetolactate synthase isozyme 3 small subunit OS=Escherichia coli (strain K12) GN=ilvH PE=1 SV=3 - [ILVH_ECOLI]	0.709293	1.11092	0.631918	1.26067	0.814504	1.16677	0.636385	2.12103	1.65089	3.47332	1.5729
P00893	ilvI	Acetolactate synthase isozyme 3 large subunit OS=Escherichia coli (strain K12) GN=ilvI PE=1 SV=2 - [ILVI_ECOLI]	0.754677	1.46991	0.698937	1.21915	0.680074	1.58333	0.840955	2.38905	1.92659	2.91733	2.23861
P0ADF8	ilvN	Acetolactate synthase isozyme 1 small subunit OS=Escherichia coli (strain K12) GN=ilvN PE=1 SV=1 - [ILVN_ECOLI]	0.946124	0.770226	0.437421	0.378133	0.104797	0.880748
P05827	ilvY	HTH-type transcriptional regulator IlvY OS=Escherichia coli (strain K12) GN=ilvY PE=4 SV=1 - [ILVY_ECOLI]	1.09871	0.885899	0.534493	1.20351	0.811478	0.793749
P69222	infA	Translation initiation factor IF-1 OS=Escherichia coli (strain K12) GN=infA PE=1 SV=2 - [IF1_ECOLI]	1.82049	1.3253	1.10252	1.35124	0.545555	1.19739	0.453756	3.52864	2.45377	3.64469	1.17285
P0A705	infB	Translation initiation factor IF-2 OS=Escherichia coli (strain K12) GN=infB PE=1 SV=1 - [IF2_ECOLI]	0.81312	0.909875	0.521635	0.811077	0.36774	0.923604	0.413783	1.95127	1.44462	1.89848	0.851694
P0A707	infC	Translation initiation factor IF-3 OS=Escherichia coli (strain K12) GN=infC PE=1 SV=1 - [IF3_ECOLI]	1.04442	0.987845	0.696173	0.806941	0.457289	0.759453	0.326609	1.50366	1.16145	1.29159	0.847572
P0CF40	insC1	Transposase InsC for insertion element IS2A OS=Escherichia coli (strain K12) GN=insC1 PE=3 SV=1 - [INSC1_ECOLI]	1.52455	0.630435	1.39499	0.935644	0.63635	1.04162
P0CF66	insE1	Transposase InsE for insertion sequence IS3A OS=Escherichia coli (strain K12) GN=insE1 PE=3 SV=1 - [INSE1_ECOLI]	1.32942
P76071	insH5	Transposase InsH for insertion sequence element IS5Y OS=Escherichia coli (strain K12) GN=insH5 PE=3 SV=1 - [INSH5_ECOLI]	1.1887	0.847966	0.669374	1.73001	1.10526	0.865372
P32053	intA	Prophage CP4-57 integrase OS=Escherichia coli (strain K12) GN=intA PE=1 SV=2 - [INTA_ECOLI]	0.768483	0.980021	0.611956	1.308	0.741144	0.935454
P76168	intQ	Putative lambdoid prophage Qin defective integrase (Fragment) OS=Escherichia coli (strain K12) GN=intQ PE=5 SV=2 - [INTQ_ECOLI]	1.821
P37326	intS	Putative prophage CPS-53 integrase OS=Escherichia coli (strain K12) GN=intS PE=1 SV=1 - [INTS_ECOLI]	0.983027
P75987	iraM	Anti-adapter protein IraM OS=Escherichia coli (strain K12) GN=iraM PE=1 SV=1 - [IRAM_ECOLI]		0.637692	0.262893	0.609053	0.484224	0.412937
P0AAN9	iraP	Anti-adapter protein IraP OS=Escherichia coli (strain K12) GN=iraP PE=1 SV=1 - [IRAP_ECOLI]	1.28188	0.111818	0.0599085	0.363288	0.18077	1.09965
P0AAC8	iscA	Iron-binding protein IscA OS=Escherichia coli (strain K12) GN=iscA PE=1 SV=1 - [ISCA_ECOLI]	1.00863	0.983853	1.00776	1.51092	0.579932	0.979737	0.429216	6.67797	6.75732	7.56874	1.4415
P0AGK8	iscR	HTH-type transcriptional regulator IscR OS=Escherichia coli (strain K12) GN=iscR PE=1 SV=1 - [ISCR_ECOLI]	1.03354	0.625216	0.542284	1.10185	0.689094	0.712631	8.206	8.98032	15.6261	7.29648	1.44845
P0A6B7	iscS	Cysteine desulfurase OS=Escherichia coli (strain K12) GN=iscS PE=1 SV=1 - [ISCS_ECOLI]	1.07104	0.835998	0.541418	1.56645	0.970376	0.739207	0.476757	1.79703	2.08979	1.60564	0.842867
P0ACD4	iscU	NifU-like protein OS=Escherichia coli (strain K12) GN=nifU PE=1 SV=1 - [NIFU_ECOLI]	1.08356	0.9764	0.852261	1.65328	0.672051	0.853721	0.228884	1.89933	2.09331	1.75635	1.17479
P0C0L9	iscX	Protein IscX OS=Escherichia coli (strain K12) GN=iscX PE=1 SV=1 - [ISCX_ECOLI]	1.9707
P22939	ispA	Farnesyl diphosphate synthase OS=Escherichia coli (strain K12) GN=ispA PE=1 SV=1 - [ISPA_ECOLI]	0.912756	0.811709	0.52525	1.28028	0.673148	0.851846	0.347939	1.24046	1.24116	1.21916	0.906671
P0AD57	ispB	Octaprenyl-diphosphate synthase OS=Escherichia coli (strain K12) GN=ispB PE=1 SV=1 - [ISPB_ECOLI]	1.64887	0.600949	0.309747	0.995835	0.724398	0.647098	0.52377	2.61906	2.10515	2.89634	1.11286
Q46893	ispD	2-C-methyl-D-erythritol 4-phosphate cytidylyltransferase OS=Escherichia coli (strain K12) GN=ispD PE=1 SV=3 - [ISPD_ECOLI]	0.97148	0.843683	0.542928	0.824642	0.340387	0.849212
P62615	ispE	4-diphosphocytidyl-2-C-methyl-D-erythritol kinase OS=Escherichia coli (strain K12) GN=ispE PE=1 SV=1 - [ISPE_ECOLI]	1.18242	1.01239	0.561425	1.19107	0.801897	0.783191
P62617	ispF	2-C-methyl-D-erythritol 2,4-cyclodiphosphate synthase OS=Escherichia coli (strain K12) GN=ispF PE=1 SV=1 - [ISPF_ECOLI]	1.18457	0.851235	0.650352	1.17153	0.468004	0.717135	0.410895	1.49	1.46105	1.45002	0.83712
P62620	ispG	4-hydroxy-3-methylbut-2-en-1-yl diphosphate synthase OS=Escherichia coli (strain K12) GN=ispG PE=1 SV=1 - [ISPG_ECOLI]	1.45041	0.805878	0.466505	1.14492	0.813251	0.752196	0.360428	1.13528	1.22727	1.12817	0.750888
P62623	ispH	4-hydroxy-3-methylbut-2-enyl diphosphate reductase OS=Escherichia coli (strain K12) GN=ispH PE=1 SV=1 - [ISPH_ECOLI]	1.4009	0.989163	0.540505	1.30976	0.722742	0.823172	1.56434	6.26682	5.6772	6.31688	0.832308
P60472	ispU	Ditrans,polycis-undecaprenyl-diphosphate synthase ((2E,6E)-farnesyl-diphosphate specific) OS=Escherichia coli (strain K12) GN=ispU PE=1 SV=1 - [UPPS_ECOLI]	1.1949	0.590783	0.340165	1.1284	0.56143	0.731848	0.356891	1.52863	1.40832	1.46446	0.851524
P07476	IVL	*CON* Involucrin OS=Homo sapiens GN=IVL PE=1 SV=1 - [INVO_HUMAN]							0.393459	3.26005	1.98498	2.28207	1.06801
P0AD59	ivy	Inhibitor of vertebrate lysozyme OS=Escherichia coli (strain K12) GN=ivy PE=1 SV=1 - [IVY_ECOLI]	1.39093	0.823304	0.515258	0.789962	0.446288	0.628832
P01839	K-BAS	*CON* Ig kappa-b4 chain C region OS=Oryctolagus cuniculus GN=K-BAS PE=4 SV=1 - [KACB_RABIT]							0.481572	1.67202	1.37283	1.8137	0.989224
P21179	katE	Catalase HPII OS=Escherichia coli (strain K12) GN=katE PE=1 SV=1 - [CATE_ECOLI]	2.57537	0.762677	0.527098	0.788632	0.432349	0.63338	0.36472	1.1409	1.03306	0.961878	0.653218
P13029	katG	Catalase-peroxidase OS=Escherichia coli (strain K12) GN=katG PE=1 SV=2 - [KATG_ECOLI]	0.890739	1.08605	0.647782	0.570119	0.2476	0.986582	0.463014	2.57491	1.39029	3.1725	0.781151
P0AB77	kbl	2-amino-3-ketobutyrate coenzyme A ligase OS=Escherichia coli (strain K12) GN=kbl PE=1 SV=1 - [KBL_ECOLI]	2.26566	0.798233	0.384733	1.28889	1.03566	0.573519	0.272822	0.77755	0.96515	0.833072	0.395213
P31069	kch	Voltage-gated potassium channel Kch OS=Escherichia coli (strain K12) GN=kch PE=1 SV=1 - [KCH_ECOLI]	1.54781	0.705597	0.63599	0.910038	0.500516	0.63159	0.291387	1.14362	1.25562	1.02245	0.771696
P37647	kdgK	2-dehydro-3-deoxygluconokinase OS=Escherichia coli (strain K12) GN=kdgK PE=3 SV=1 - [KDGK_ECOLI]	1.40084	0.820884	0.47394	1.06681	0.682641	0.795433	0.329961	1.03773	1.00427	1.4323	1.45173
P76268	kdgR	Transcriptional regulator KdgR OS=Escherichia coli (strain K12) GN=kdgR PE=1 SV=1 - [KDGR_ECOLI]	1.11658	0.832495	0.500691	1.06596	0.663994	0.818471	0.725935	3.41069	3.78846	2.94295	0.869909
P21866	kdpE	KDP operon transcriptional regulatory protein KdpE OS=Escherichia coli (strain K12) GN=kdpE PE=1 SV=3 - [KDPE_ECOLI]	1.28438	0.699732	0.398184	0.989364	0.563915	0.510593
P0A715	kdsA	2-dehydro-3-deoxyphosphooctonate aldolase OS=Escherichia coli (strain K12) GN=kdsA PE=1 SV=1 - [KDSA_ECOLI]	1.55233	1.05971	0.571403	1.48558	0.892439	0.776943	0.354453	1.29581	1.26237	1.22266	0.699452
P04951	kdsB	3-deoxy-manno-octulosonate cytidylyltransferase OS=Escherichia coli (strain K12) GN=kdsB PE=1 SV=2 - [KDSB_ECOLI]	1.05979	0.780163	0.512761	0.99115	0.602535	0.794979	1.17153	3.64812	3.66588	3.69168	1.05261
P0ABZ4	kdsC	3-deoxy-D-manno-octulosonate 8-phosphate phosphatase KdsC OS=Escherichia coli (strain K12) GN=kdsC PE=1 SV=1 - [KDSC_ECOLI]	0.502418	0.817063	0.487934	1.04392	0.596175	0.700081	0.447579	1.13762	1.19816	1.15588	0.78384
P45395	kdsD	Arabinose 5-phosphate isomerase KdsD OS=Escherichia coli (strain K12) GN=kdsD PE=1 SV=1 - [KDSD_ECOLI]	1.43541	0.857107	0.436101	1.07234	0.593797	0.696989	0.445832	1.18594	1.16623	1.22889	0.755038
P37769	kduD	2-dehydro-3-deoxy-D-gluconate 5-dehydrogenase OS=Escherichia coli (strain K12) GN=kduD PE=3 SV=2 - [KDUD_ECOLI]	1.23418	0.626456	0.329155	0.68051	0.575349	0.582252
P0A754	kefF	Glutathione-regulated potassium-efflux system ancillary protein KefF OS=Escherichia coli (strain K12) GN=kefF PE=1 SV=1 - [KEFF_ECOLI]	1.16068
P0AEX3	kgtP	Alpha-ketoglutarate permease OS=Escherichia coli (strain K12) GN=kgtP PE=1 SV=1 - [KGTP_ECOLI]	1.43401	0.16194	0.100583	0.601697	0.724777	0.616861	0.511716	0.984935	1.20041	1.02663	0.857604
P04264	KRT1	*CON* Keratin, type II cytoskeletal 1 OS=Homo sapiens GN=KRT1 PE=1 SV=6 - [K2C1_HUMAN]							0.516929	0.495473	2.21031	0.852835	0.768534
P35908	KRT2	*CON* Keratin, type II cytoskeletal 2 epidermal OS=Homo sapiens GN=KRT2 PE=1 SV=2 - [K22E_HUMAN]		1.4123	2.14284	4.45646	2.15502	5.76677	0.65279	1.13132	6.54924	1.53867	1.49479
P35527	KRT9	*CON* Keratin, type I cytoskeletal 9 OS=Homo sapiens GN=KRT9 PE=1 SV=3 - [K1C9_HUMAN]		0.821344	0.552113	1.76514	1.02999	1.39499
P03023	lacI	Lactose operon repressor OS=Escherichia coli (strain K12) GN=lacI PE=1 SV=3 - [LACI_ECOLI]	1.49	0.456084	0.2746	0.60049	0.388085	0.439421
P02943	lamB	Maltoporin OS=Escherichia coli (strain K12) GN=lamB PE=1 SV=1 - [LAMB_ECOLI]	2.42093	0.697245	0.297948	1.86614	1.32943	0.765947	0.440652	1.06987	4.52743	1.2706	0.874672
P37005	lasT	Uncharacterized tRNA/rRNA methyltransferase LasT OS=Escherichia coli (strain K12) GN=lasT PE=3 SV=2 - [LAST_ECOLI]	0.943547	0.923073	0.498047	1.1215	0.693156	0.996475	0.407317	0.90517	1.05428	1.06504	0.72989
P76008	ldcA	Murein tetrapeptide carboxypeptidase OS=Escherichia coli (strain K12) GN=ldcA PE=1 SV=1 - [LDCA_ECOLI]	1.33077	0.806004	0.615849	1.02218	0.766159	0.838405	0.624848	2.18342	1.63429	1.91309	0.965127
P52643	ldhA	D-lactate dehydrogenase OS=Escherichia coli (strain K12) GN=ldhA PE=1 SV=1 - [LDHD_ECOLI]	1.06218	1.19682	0.584447	1.2862	0.738351	0.806019	0.313659	1.51965	1.09195	1.38923	0.962355
P60785	lepA	Elongation factor 4 OS=Escherichia coli (strain K12) GN=lepA PE=1 SV=1 - [LEPA_ECOLI]	0.884412	0.901396	0.473316	1.06117	0.630286	0.734889	0.392693	1.34588	1.08682	1.32002	0.772865
P00803	lepB	Signal peptidase I OS=Escherichia coli (strain K12) GN=lepB PE=1 SV=2 - [LEP_ECOLI]	1.4347	1.43069	0.706784	1.97843	0.953138	0.754521
P09151	leuA	2-isopropylmalate synthase OS=Escherichia coli (strain K12) GN=leuA PE=1 SV=5 - [LEU1_ECOLI]	0.653315	1.98198	0.668457	1.10998	0.404898	1.75076	0.827562	3.7436	2.67585	3.33304	1.42626
P30125	leuB	3-isopropylmalate dehydrogenase OS=Escherichia coli (strain K12) GN=leuB PE=1 SV=3 - [LEU3_ECOLI]	0.695928	1.59271	0.857451	1.2402	0.557632	1.56871	0.681153	2.55121	1.75702	2.99542	1.48024
P0A6A6	leuC	3-isopropylmalate dehydratase large subunit OS=Escherichia coli (strain K12) GN=leuC PE=1 SV=2 - [LEUC_ECOLI]	0.574555	1.97589	0.978805	1.06698	0.288293	2.0533	0.749076	5.32302	3.47657	6.70958	1.2351
P30126	leuD	3-isopropylmalate dehydratase small subunit OS=Escherichia coli (strain K12) GN=leuD PE=1 SV=3 - [LEUD_ECOLI]	0.639976	2.18902	0.966853	0.989044	0.305757	2.06209	2.63668	15.2149	9.84936	19.2105	0.95961
P07813	leuS	Leucine--tRNA ligase OS=Escherichia coli (strain K12) GN=leuS PE=1 SV=2 - [SYL_ECOLI]	0.717945	0.895457	0.56018	1.09658	0.625512	0.865842	0.466165	1.44397	1.37173	1.57322	1.0135
P0A7C2	lexA	LexA repressor OS=Escherichia coli (strain K12) GN=lexA PE=1 SV=1 - [LEXA_ECOLI]	1.26846	0.858129	0.67245	0.92789	0.480799	0.870755	0.325066	2.04822	1.51628	2.05937	1.26361
P60955	lgt	Prolipoprotein diacylglyceryl transferase OS=Escherichia coli (strain K12) GN=lgt PE=1 SV=1 - [LGT_ECOLI]	1.97832	0.653495	0.242854	1.13419	1.34823	0.698064	0.13092	1.21818	1.0871	1.16565	0.619528
P37339	lhgO	L-2-hydroxyglutarate oxidase LhgO OS=Escherichia coli (strain K12) GN=lhgO PE=1 SV=3 - [LHGO_ECOLI]	2.58229	0.714075	0.324323	0.876546	0.861739	0.513536	0.312995	0.623834	0.491403	0.365663	0.477575
P15042	ligA	DNA ligase OS=Escherichia coli (strain K12) GN=ligA PE=1 SV=2 - [DNLJ_ECOLI]	0.953223	0.839224	0.466006	0.891698	0.470557	0.627895	0.378471	1.41235	1.25178	1.64326	0.797956
P25772	ligB	DNA ligase B OS=Escherichia coli (strain K12) GN=ligB PE=1 SV=2 - [LIGB_ECOLI]	1.15989
P37025	ligT	2'-5'-RNA ligase OS=Escherichia coli (strain K12) GN=ligT PE=1 SV=3 - [LIGT_ECOLI]		0.365996	0.26316	0.640842	0.712171	0.672534	0.442833	1.04364	1.01555	1.09029	0.475179
P60716	lipA	Lipoyl synthase OS=Escherichia coli (strain K12) GN=lipA PE=1 SV=1 - [LIPA_ECOLI]	2.34042	1.01921	0.835772	2.21391	1.44229	1.11801	0.422806	3.78415	4.34006	4.97008	0.892818
P60720	lipB	Octanoyltransferase OS=Escherichia coli (strain K12) GN=lipB PE=1 SV=1 - [LIPB_ECOLI]	1.57792	3.23429	1.94851	5.34335	2.54653	2.41976	0.469827	1.51276	1.65527	1.36849	0.865696
P22731	livF	High-affinity branched-chain amino acid transport ATP-binding protein LivF OS=Escherichia coli (strain K12) GN=livF PE=1 SV=2 - [LIVF_ECOLI]	0.714834	1.82687	1.19897	1.15963	0.637243	1.48052
P0AD96	livJ	Leu/Ile/Val-binding protein OS=Escherichia coli (strain K12) GN=livJ PE=1 SV=1 - [LIVJ_ECOLI]	2.38664	1.31258	0.522836	0.671304	0.326737	0.832836	0.630305	1.81243	1.76661	2.04545	1.29999
P04816	livK	Leucine-specific-binding protein OS=Escherichia coli (strain K12) GN=livK PE=1 SV=2 - [LIVK_ECOLI]	0.593089	1.43192	0.90141	0.743861	0.298993	1.71687	0.413317	2.3762	1.63808	2.39678	1.84624
P33232	lldD	L-lactate dehydrogenase [cytochrome] OS=Escherichia coli (strain K12) GN=lldD PE=1 SV=1 - [LLDD_ECOLI]		1.13608	0.297757	0.991398	0.470735	0.561938
P0ACL7	lldR	Putative L-lactate dehydrogenase operon regulatory protein OS=Escherichia coli (strain K12) GN=lldR PE=2 SV=1 - [LLDR_ECOLI]	1.11778
P23930	lnt	Apolipoprotein N-acyltransferase OS=Escherichia coli (strain K12) GN=lnt PE=1 SV=1 - [LNT_ECOLI]	1.02761	0.728698	0.414506	0.703953	0.423321	0.664707	0.472571	1.37568	1.18244	1.20602	0.722714
P25894	loiP	Uncharacterized metalloprotease YggG OS=Escherichia coli (strain K12) GN=yggG PE=1 SV=2 - [YGGG_ECOLI]	1.55842	0.793587	0.481679	1.33686	0.956107	0.752585	0.372426	1.68949	1.29897	1.64683	0.964717
P61316	lolA	Outer-membrane lipoprotein carrier protein OS=Escherichia coli (strain K12) GN=lolA PE=1 SV=1 - [LOLA_ECOLI]	1.06856	0.78511	0.450004	0.957632	0.472108	0.782848	0.246175	1.41098	1.29766	1.30358	1.10424
P61320	lolB	Outer-membrane lipoprotein LolB OS=Escherichia coli (strain K12) GN=lolB PE=1 SV=1 - [LOLB_ECOLI]	0.954338	0.687668	0.36119	0.871601	0.574959	0.726236	0.799911	2.27471	2.44418	2.47611	1.14853
P0ADC3	lolC	Lipoprotein-releasing system transmembrane protein LolC OS=Escherichia coli (strain K12) GN=lolC PE=1 SV=1 - [LOLC_ECOLI]		0.803591	0.393276	1.06016	0.839066	0.398822
P75957	lolD	Lipoprotein-releasing system ATP-binding protein LolD OS=Escherichia coli (strain K12) GN=lolD PE=1 SV=2 - [LOLD_ECOLI]	2.00562	1.55794	0.618841	2.79812	1.90436	1.24585	0.562019	1.41562	1.3582	1.68009	1.07699
P75958	lolE	Lipoprotein-releasing system transmembrane protein LolE OS=Escherichia coli (strain K12) GN=lolE PE=1 SV=3 - [LOLE_ECOLI]		0.728563	0.405623	0.97685	0.610756	0.861627
P0A9M0	lon	Lon protease OS=Escherichia coli (strain K12) GN=lon PE=1 SV=1 - [LON_ECOLI]	1.02686	0.890242	0.0736913	0.664963	0.209442	0.499667
P0A9P0	lpdA	Dihydrolipoyl dehydrogenase OS=Escherichia coli (strain K12) GN=lpdA PE=1 SV=2 - [DLDH_ECOLI]	1.30581	0.820683	0.606232	1.10461	0.510029	0.964067	2.80555	8.90342	8.797	9.33949	0.985134
P32099	lplA	Lipoate-protein ligase A OS=Escherichia coli (strain K12) GN=lplA PE=1 SV=3 - [LPLA_ECOLI]	1.36754	0.85546	0.572924	1.07667	0.578875	0.790914	0.513626	2.2378	1.76023	1.99615	1.2397
P39196	lplT	Lysophospholipid transporter LplT OS=Escherichia coli (strain K12) GN=lplT PE=1 SV=2 - [LPLT_ECOLI]	1.25994
P45464	lpoA	Penicillin-binding protein activator LpoA OS=Escherichia coli (strain K12) GN=lpoA PE=1 SV=1 - [LPOA_ECOLI]	1.03356	0.759612	0.447619	0.886113	0.480225	0.782054	0.467985	1.69647	1.49643	1.73206	1.08024
P0AB38	lpoB	Penicillin-binding protein activator LpoB OS=Escherichia coli (strain K12) GN=lpoB PE=1 SV=1 - [LPOB_ECOLI]	1.55562	0.71891	0.371923	1.00817	0.710745	0.702375	0.21821	1.34307	0.958032	1.22015	0.923701
P69776	lpp	Major outer membrane lipoprotein Lpp OS=Escherichia coli (strain K12) GN=lpp PE=1 SV=1 - [LPP_ECOLI]	1.1184	1.16239	0.638676	2.29129	1.00652	1.62327	0.846567	1.64194	1.4962	1.73503	0.813608
P0ADV1	lptA	Lipopolysaccharide export system protein LptA OS=Escherichia coli (strain K12) GN=lptA PE=1 SV=1 - [LPTA_ECOLI]	1.67447	1.0569	0.751208	1.35426	0.674279	0.973878
P0A9V1	lptB	Lipopolysaccharide export system ATP-binding protein LptB OS=Escherichia coli (strain K12) GN=lptB PE=1 SV=2 - [LPTB_ECOLI]	1.2766	0.697314	0.307968	1.36465	0.861253	0.847093	0.522284	1.40204	1.43438	1.4052	1.28122
P31554	lptD	LPS-assembly protein LptD OS=Escherichia coli (strain K12) GN=lptD PE=1 SV=2 - [LPTD_ECOLI]	1.0651	0.713946	0.440286	1.01541	0.651826	0.665688	0.43632	1.53725	1.29785	1.45521	0.887543
P0ADC1	lptE	LPS-assembly lipoprotein LptE OS=Escherichia coli (strain K12) GN=lptE PE=1 SV=1 - [LPTE_ECOLI]	1.32164	0.794924	0.459357	1.15506	0.885593	0.643519	0.109348	1.4795	1.02555	1.54538	0.765634
P0A722	lpxA	Acyl-[acyl-carrier-protein]--UDP-N-acetylglucosamine O-acyltransferase OS=Escherichia coli (strain K12) GN=lpxA PE=1 SV=1 - [LPXA_ECOLI]	1.76444	0.827825	0.464497	1.0136	0.4997	0.842441	0.38576	1.70859	1.31838	1.44952	0.674284
P10441	lpxB	Lipid-A-disaccharide synthase OS=Escherichia coli (strain K12) GN=lpxB PE=1 SV=2 - [LPXB_ECOLI]	1.82473	0.941614	0.473289	0.992187	0.440841	0.556808
P0A725	lpxC	UDP-3-O-[3-hydroxymyristoyl] N-acetylglucosamine deacetylase OS=Escherichia coli (strain K12) GN=lpxC PE=3 SV=1 - [LPXC_ECOLI]	2.08904
P21645	lpxD	UDP-3-O-(3-hydroxymyristoyl)glucosamine N-acyltransferase OS=Escherichia coli (strain K12) GN=lpxD PE=1 SV=2 - [LPXD_ECOLI]		0.573169	0.328334	0.605388	0.254204	0.653599
P43341	lpxH	UDP-2,3-diacylglucosamine hydrolase OS=Escherichia coli (strain K12) GN=lpxH PE=1 SV=2 - [LPXH_ECOLI]	0.868642	0.799049	0.546554	1.09788	0.582039	0.701514
P36771	lrhA	Probable HTH-type transcriptional regulator LrhA OS=Escherichia coli (strain K12) GN=lrhA PE=4 SV=2 - [LRHA_ECOLI]		1.28393	0.598555	0.993793	0.451206	0.747089	0.399288	1.15943	0.944161	1.80999	1.05233
P0ACJ0	lrp	Leucine-responsive regulatory protein OS=Escherichia coli (strain K12) GN=lrp PE=1 SV=2 - [LRP_ECOLI]	2.44669	0.778629	0.546329	0.59826	0.280525	1.02888
P77257	lsrA	Autoinducer 2 import ATP-binding protein LsrA OS=Escherichia coli (strain K12) GN=lsrA PE=1 SV=1 - [LSRA_ECOLI]	0.24461
P76142	lsrB	Autoinducer 2-binding protein LsrB OS=Escherichia coli (strain K12) GN=lsrB PE=1 SV=1 - [LSRB_ECOLI]		0.61231	0.385547	1.15626	0.756505	0.526419
P77432	lsrK	Autoinducer 2 kinase LsrK OS=Escherichia coli (strain K12) GN=lsrK PE=1 SV=1 - [LSRK_ECOLI]	1.20157
P75823	ltaE	Low specificity L-threonine aldolase OS=Escherichia coli (strain K12) GN=ltaE PE=1 SV=1 - [LTAE_ECOLI]	0.699653	0.816053	0.477068	0.892116	0.4287	0.789267	0.35739	1.3484	1.08866	1.23971	1.04871
P45578	luxS	S-ribosylhomocysteine lyase OS=Escherichia coli (strain K12) GN=luxS PE=1 SV=3 - [LUXS_ECOLI]	1.68753	1.12645	0.602818	1.36834	0.629312	0.699491	0.286878	1.45001	1.32099	1.49744	0.715787
P00861	lysA	Diaminopimelate decarboxylase OS=Escherichia coli (strain K12) GN=lysA PE=1 SV=1 - [DCDA_ECOLI]	1.12674	1.87457	0.663309	1.56407	0.625045	0.860539
P08660	lysC	Lysine-sensitive aspartokinase 3 OS=Escherichia coli (strain K12) GN=lysC PE=1 SV=2 - [AK3_ECOLI]	0.916165	0.750399	0.475856	0.888388	0.516114	0.708094	0.340862	1.28134	1.01258	1.15558	0.943698
P0A8N3	lysS	Lysine--tRNA ligase OS=Escherichia coli (strain K12) GN=lysS PE=1 SV=2 - [SYK1_ECOLI]	0.925986	0.8377	0.424783	0.908822	0.476354	0.83047	0.523682	1.54687	1.39145	1.56088	0.943627
P0A8N5	lysU	Lysine--tRNA ligase, heat inducible OS=Escherichia coli (strain K12) GN=lysU PE=1 SV=2 - [SYK2_ECOLI]	8.24133	0.646469	0.28392	0.888494	0.613819	0.324057	0.125651	0.503546	0.516247	0.422531	0.254047
P37677	lyx	L-xylulose/3-keto-L-gulonate kinase OS=Escherichia coli (strain K12) GN=lyx PE=1 SV=1 - [LYXK_ECOLI]		1.06647	0.360576	0.833803	0.40723	0.614735
P77791	maa	Maltose O-acetyltransferase OS=Escherichia coli (strain K12) GN=maa PE=1 SV=3 - [MAA_ECOLI]	1.34084	0.975252	0.421242	2.48077	0.883099	1.60359
P75830	macA	Macrolide-specific efflux protein MacA OS=Escherichia coli (strain K12) GN=macA PE=1 SV=2 - [MACA_ECOLI]		0.529919	1.01097	0.437682	0.225453	1.19767
P26616	maeA	NAD-dependent malic enzyme OS=Escherichia coli (strain K12) GN=maeA PE=1 SV=4 - [MAO1_ECOLI]	0.398522	0.667376	0.457176	0.524694	0.25761	0.811745	0.375938	1.2794	1.18138	1.37409	0.729577
P76558	maeB	NADP-dependent malic enzyme OS=Escherichia coli (strain K12) GN=maeB PE=1 SV=1 - [MAO2_ECOLI]		0.948258	0.462244	0.647772	0.262984	0.91409	0.321602	1.22006	0.800771	0.994443	0.584635
P23917	mak	Fructokinase OS=Escherichia coli (strain K12) GN=mak PE=1 SV=2 - [MAK_ECOLI]	1.11997	0.944692	0.489619	1.27292	0.738417	0.790778	0.298162	1.32664	1.62014	1.46155	0.776085
P0AEX9	malE	Maltose-binding periplasmic protein OS=Escherichia coli (strain K12) GN=malE PE=1 SV=1 - [MALE_ECOLI]	1.42622	1.02588	0.365763	2.59987	1.01213	0.847393	0.343347	1.36341	3.50503	1.85641	1.00738
P18811	malI	Maltose regulon regulatory protein MalI OS=Escherichia coli (strain K12) GN=malI PE=2 SV=2 - [MALI_ECOLI]	1.02027
P68187	malK	Maltose/maltodextrin import ATP-binding protein MalK OS=Escherichia coli (strain K12) GN=malK PE=1 SV=1 - [MALK_ECOLI]	3.56007	1.33215	0.417635	2.1145	1.44271	0.772691
P03841	malM	Maltose operon periplasmic protein OS=Escherichia coli (strain K12) GN=malM PE=4 SV=1 - [MALM_ECOLI]	2.00566	1.22372	0.413605	2.05948	0.822014	0.852275	0.231247	0.749877	3.1712	1.67904	1.02768
P00490	malP	Maltodextrin phosphorylase OS=Escherichia coli (strain K12) GN=malP PE=1 SV=7 - [PHSM_ECOLI]	0.914409	0.891604	0.427679	1.44764	0.581004	1.07581	0.418736	1.32353	1.14389	1.33891	0.787335
P15977	malQ	4-alpha-glucanotransferase OS=Escherichia coli (strain K12) GN=malQ PE=3 SV=2 - [MALQ_ECOLI]	1.50412	0.929642	0.356297	1.79044	0.718167	0.9152	0.448379	1.44785	1.46592	1.54776	0.762448
P23256	malY	Protein MalY OS=Escherichia coli (strain K12) GN=malY PE=1 SV=1 - [MALY_ECOLI]	1.45982	0.737789	0.468258	0.867922	0.661882	0.667445
P00946	manA	Mannose-6-phosphate isomerase OS=Escherichia coli (strain K12) GN=manA PE=1 SV=1 - [MANA_ECOLI]	1.49047	0.91021	0.536432	1.08757	0.525972	0.759248	0.270148	1.40083	1.23129	1.2978	0.991037
P69797	manX	PTS system mannose-specific EIIAB component OS=Escherichia coli (strain K12) GN=manX PE=1 SV=2 - [PTNAB_ECOLI]	1.00204	0.820614	0.528848	0.903969	0.42318	0.807606	0.351989	1.32264	1.31341	1.26553	0.757858
P69801	manY	Mannose permease IIC component OS=Escherichia coli (strain K12) GN=manY PE=1 SV=1 - [PTNC_ECOLI]		0.166316	0.17861	1.35981	1.25277	0.220997
P69805	manZ	Mannose permease IID component OS=Escherichia coli (strain K12) GN=manZ PE=1 SV=2 - [PTND_ECOLI]	0.884433	1.63078	0.544257	1.26712	0.5119	1.339
P0AE18	map	Methionine aminopeptidase OS=Escherichia coli (strain K12) GN=map PE=1 SV=1 - [AMPM_ECOLI]	1.07942	0.710976	0.513729	0.904081	0.535322	0.614915	0.410459	1.34478	1.30695	1.28621	0.789265
P0ACH5	marA	Multiple antibiotic resistance protein MarA OS=Escherichia coli (strain K12) GN=marA PE=1 SV=2 - [MARA_ECOLI]		0.686795	0.663121	1.87928	0.474324	1.30035
P0AEY1	marC	UPF0056 inner membrane protein MarC OS=Escherichia coli (strain K12) GN=marC PE=1 SV=1 - [MARC_ECOLI]	1.05732
P27245	marR	Multiple antibiotic resistance protein MarR OS=Escherichia coli (strain K12) GN=marR PE=1 SV=2 - [MARR_ECOLI]	1.15865	0.767871	0.517246	1.15753	0.575623	0.784584
P77188	matC	Uncharacterized protein MatC OS=Escherichia coli (strain K12) GN=matC PE=1 SV=1 - [MATC_ECOLI]							0.647164	2.06808	2.28245	2.70204	1.34905
P0A8N0	matP	Macrodomain Ter protein OS=Escherichia coli (strain K12) GN=matP PE=1 SV=1 - [MATP_ECOLI]	0.715896	0.987306	0.699409	0.830215	0.398247	0.905543	0.456288	1.21849	1.04356	1.22768	0.88766
P0AE72	mazE	Antitoxin MazE OS=Escherichia coli (strain K12) GN=mazE PE=1 SV=1 - [MAZE_ECOLI]	1.31245	1.26632	1.39746	1.62802	0.944271	0.982803	1.42003	9.24661	4.17069	10.6077	1.26097
P0AE70	mazF	mRNA interferase MazF OS=Escherichia coli (strain K12) GN=mazF PE=1 SV=1 - [MAZF_ECOLI]	1.63993						0.294896	1.8229	1.59963	1.57717	1.01724
P0AEY3	mazG	Nucleoside triphosphate pyrophosphohydrolase OS=Escherichia coli (strain K12) GN=mazG PE=1 SV=1 - [MAZG_ECOLI]	1.22791	1.1468	0.644716	1.46029	0.625486	0.835123
Q47154	mbhA	Putative protein MbhA OS=Escherichia coli (strain K12) GN=mbhA PE=5 SV=1 - [MBHA_ECOLI]		1.6659		2.17762	0.981663	1.19022
P76114	mcbR	HTH-type transcriptional regulator McbR OS=Escherichia coli (strain K12) GN=mcbR PE=1 SV=2 - [MCBR_ECOLI]	0.967204
P15005-2	mcrB	Isoform 33 kDa of 5-methylcytosine-specific restriction enzyme B OS=Escherichia coli (strain K12) GN=mcrB - [MCRB_ECOLI]							0.597477	1.61926	1.71617	1.39875	0.871565
P0AEY5	mdaB	Modulator of drug activity B OS=Escherichia coli (strain K12) GN=mdaB PE=1 SV=1 - [MDAB_ECOLI]	2.37695	0.806522	0.611463	1.61438	1.14662	0.602291	0.334887	1.65188	1.63033	1.36	0.691721
P0AEY8	mdfA	Multidrug transporter MdfA OS=Escherichia coli (strain K12) GN=mdfA PE=1 SV=1 - [MDFA_ECOLI]	0.868181	0.775925	0.470436	0.67369	0.448054	0.626132
P61889	mdh	Malate dehydrogenase OS=Escherichia coli (strain K12) GN=mdh PE=1 SV=1 - [MDH_ECOLI]	1.36339	0.816636	0.321018	0.819405	0.478314	0.540247	0.248185	0.710781	0.794691	0.76667	0.515136
P39401	mdoB	Phosphoglycerol transferase I OS=Escherichia coli (strain K12) GN=mdoB PE=3 SV=2 - [OPGB_ECOLI]	1.04918	0.739422	0.379229	1.0035	0.680359	0.593591
P40120	mdoD	Glucans biosynthesis protein D OS=Escherichia coli (strain K12) GN=mdoD PE=1 SV=3 - [OPGD_ECOLI]	1.03494	0.777235	0.478524	0.923025	0.590529	0.817291	0.330229	1.33848	1.3409	1.46503	1.01485
P33136	mdoG	Glucans biosynthesis protein G OS=Escherichia coli (strain K12) GN=mdoG PE=1 SV=1 - [OPGG_ECOLI]	0.834765	0.629261	0.452009	0.659643	0.458372	0.695898	0.66029	2.57516	2.73366	3.49529	1.06285
P76397	mdtA	Multidrug resistance protein MdtA OS=Escherichia coli (strain K12) GN=mdtA PE=2 SV=2 - [MDTA_ECOLI]	1.07656
P37636	mdtE	Multidrug resistance protein MdtE OS=Escherichia coli (strain K12) GN=mdtE PE=1 SV=1 - [MDTE_ECOLI]	4.56748	1.17623	0.582054	1.8634	2.32125	0.396318
P37637	mdtF	Multidrug resistance protein MdtF OS=Escherichia coli (strain K12) GN=mdtF PE=1 SV=1 - [MDTF_ECOLI]		1.3143	0.513937	1.59461	1.35446	0.548057
P37340	mdtK	Multidrug resistance protein MdtK OS=Escherichia coli (strain K12) GN=mdtK PE=1 SV=2 - [MDTK_ECOLI]		1.04778	0.485191	0.777003	0.384528	0.760199
P32166	menA	1,4-dihydroxy-2-naphthoate octaprenyltransferase OS=Escherichia coli (strain K12) GN=menA PE=1 SV=1 - [MENA_ECOLI]	1.66976
P0ABU0	menB	1,4-Dihydroxy-2-naphthoyl-CoA synthase OS=Escherichia coli (strain K12) GN=menB PE=1 SV=1 - [MENB_ECOLI]	0.845823	0.876641	0.543961	0.833471	0.448508	0.833661	0.566089	1.2346	1.10725	1.24005	0.781022
P29208	menC	o-succinylbenzoate synthase OS=Escherichia coli (strain K12) GN=menC PE=1 SV=2 - [MENC_ECOLI]	1.30228	0.901995	0.539912	1.23358	0.696545	0.901375	0.484651	1.29729	1.29031	1.32707	0.945639
P37353	menE	2-succinylbenzoate--CoA ligase OS=Escherichia coli (strain K12) GN=menE PE=1 SV=2 - [MENE_ECOLI]	1.14719	0.228401	0.117876	0.460334	0.8432	0.313805
P38051	menF	Menaquinone-specific isochorismate synthase OS=Escherichia coli (strain K12) GN=menF PE=1 SV=4 - [MENF_ECOLI]	1.82131	0.344546	0.188593	0.777049	1.20424	0.32907	0.510226	1.40206	1.45349	1.40499	1.08584
P37355	menH	2-succinyl-6-hydroxy-2,4-cyclohexadiene-1-carboxylate synthase OS=Escherichia coli (strain K12) GN=menH PE=1 SV=2 - [MENH_ECOLI]	1.41949
P0C0T5	mepA	Penicillin-insensitive murein endopeptidase OS=Escherichia coli (strain K12) GN=mepA PE=1 SV=1 - [MEPA_ECOLI]	0.718154	0.0771975	0.0329791	1.00092	1.39919	0.309248
P07623	metA	Homoserine O-succinyltransferase OS=Escherichia coli (strain K12) GN=metA PE=1 SV=4 - [META_ECOLI]	1.14049
P00935	metB	Cystathionine gamma-synthase OS=Escherichia coli (strain K12) GN=metB PE=1 SV=1 - [METB_ECOLI]	0.940861	0.742007	0.2942	0.928397	0.633508	0.712148	0.295496	1.25005	0.679939	1.23551	1.28951
P06721	metC	Cystathionine beta-lyase MetC OS=Escherichia coli (strain K12) GN=metC PE=1 SV=1 - [METC_ECOLI]	0.720741	0.531873	0.30647	0.49598	0.349064	0.881314	0.332856	1.45145	0.603752	1.39316	1.01007
P25665	metE	5-methyltetrahydropteroyltriglutamate--homocysteine methyltransferase OS=Escherichia coli (strain K12) GN=metE PE=1 SV=6 - [METE_ECOLI]	1.02109	0.5319	0.422036	1.09398	1.05945	0.798822	0.13521	1.70011	0.344965	1.36607	1.56709
P0AEZ1	metF	5,10-methylenetetrahydrofolate reductase OS=Escherichia coli (strain K12) GN=metF PE=1 SV=1 - [METF_ECOLI]	1.93398	0.694696	0.498268	1.37889	1.11793	0.904573	0.0811953	1.78657	0.161195	1.62364	1.29535
P00959	metG	Methionine--tRNA ligase OS=Escherichia coli (strain K12) GN=metG PE=1 SV=2 - [SYM_ECOLI]	0.801361	0.774984	0.469899	0.796749	0.467066	0.758433	0.407725	1.4998	1.29537	1.40878	0.874277
P13009	metH	Methionine synthase OS=Escherichia coli (strain K12) GN=metH PE=1 SV=5 - [METH_ECOLI]	1.10489	0.947345	0.656767	1.09473	0.544158	1.01532	0.840631	3.3557	2.90754	3.18291	1.48357
P0A8U6	metJ	Met repressor OS=Escherichia coli (strain K12) GN=metJ PE=1 SV=2 - [METJ_ECOLI]	0.929527	1.236	1.20916	1.8108	0.939318	0.980301	0.269762	2.17643	1.15057	2.07529	1.19717
P0A817	metK	S-adenosylmethionine synthase OS=Escherichia coli (strain K12) GN=metK PE=1 SV=2 - [METK_ECOLI]	0.92978	0.629751	0.425945	0.695127	0.456162	0.639484	0.348254	1.84078	1.20589	1.77782	0.930271
P00562	metL	Bifunctional aspartokinase/homoserine dehydrogenase 2 OS=Escherichia coli (strain K12) GN=metL PE=1 SV=3 - [AK2H_ECOLI]	1.44171	0.668403	0.446498	1.1862	0.817509	0.868374	0.501587	1.63857	0.508406	1.15909	1.09895
P30750	metN	Methionine import ATP-binding protein MetN OS=Escherichia coli (strain K12) GN=metN PE=1 SV=4 - [METN_ECOLI]	0.552403	0.921226	0.583974	0.700883	0.385329	0.81679	0.258598	1.38175	0.739061	1.46458	0.95779
P28635	metQ	D-methionine-binding lipoprotein MetQ OS=Escherichia coli (strain K12) GN=metQ PE=1 SV=2 - [METQ_ECOLI]	0.711871	0.791895	0.532987	0.606967	0.248252	0.687333	0.340551	1.92975	0.984244	1.952	1.36764
P0A9F9	metR	HTH-type transcriptional regulator MetR OS=Escherichia coli (strain K12) GN=metR PE=4 SV=1 - [METR_ECOLI]		0.429255	0.390251	0.393895	0.381814	0.540988
P30958	mfd	Transcription-repair-coupling factor OS=Escherichia coli (strain K12) GN=mfd PE=1 SV=2 - [MFD_ECOLI]	1.26699	0.817873	0.535071	0.846307	0.468584	0.757687	0.418061	1.36444	1.24415	1.31897	0.745812
P0AAG8	mglA	Galactose/methyl galactoside import ATP-binding protein MglA OS=Escherichia coli (strain K12) GN=mglA PE=1 SV=1 - [MGLA_ECOLI]							0.418772	1.06827	1.06212	1.07884	0.761487
P0AEE5	mglB	D-galactose-binding periplasmic protein OS=Escherichia coli (strain K12) GN=mglB PE=1 SV=1 - [DGAL_ECOLI]	1.53841	0.936453	0.410523	0.966256	0.408805	0.594654	0.206243	1.04619	0.96076	1.03961	0.759199
P0A731	mgsA	Methylglyoxal synthase OS=Escherichia coli (strain K12) GN=mgsA PE=1 SV=1 - [MGSA_ECOLI]	0.95254	0.953528	0.535206	1.28723	0.687576	0.903741	0.761468	2.78127	2.46575	2.67862	0.777825
P0ABB8	mgtA	Magnesium-transporting ATPase, P-type 1 OS=Escherichia coli (strain K12) GN=mgtA PE=1 SV=1 - [ATMA_ECOLI]		10.1355	5.04236	8.73054	4.88073	6.45675
P77044	mhpC	2-hydroxy-6-oxononadienedioate/2-hydroxy-6-oxononatrienedioate hydrolase OS=Escherichia coli (strain K12) GN=mhpC PE=1 SV=4 - [MHPC_ECOLI]		0.748031	0.3775	1.09501	0.700098	1.16295
P77608	mhpD	2-keto-4-pentenoate hydratase OS=Escherichia coli (strain K12) GN=mhpD PE=1 SV=2 - [MHPD_ECOLI]	1.15575
P51020	mhpE	4-hydroxy-2-oxovalerate aldolase OS=Escherichia coli (strain K12) GN=mhpE PE=1 SV=2 - [HOA_ECOLI]		0.516469	0.205619	0.908843	0.586032	0.679206
P16384	miaA	tRNA dimethylallyltransferase OS=Escherichia coli (strain K12) GN=miaA PE=1 SV=2 - [MIAA_ECOLI]	1.45421	0.668849	0.341147	1.06685	0.876995	0.542584	0.252956	0.888175	0.922423	0.875292	0.589011
P0AEI1	miaB	(Dimethylallyl)adenosine tRNA methylthiotransferase MiaB OS=Escherichia coli (strain K12) GN=miaB PE=1 SV=1 - [MIAB_ECOLI]	1.19065	0.821243	0.585521	1.21566	0.751399	0.872843	0.316796	2.22426	2.22362	1.97154	0.782364
P18196	minC	Septum site-determining protein MinC OS=Escherichia coli (strain K12) GN=minC PE=1 SV=1 - [MINC_ECOLI]	1.4588	0.769752	0.537784	1.00562	0.642326	0.756295
P0AEZ3	minD	Septum site-determining protein MinD OS=Escherichia coli (strain K12) GN=minD PE=1 SV=2 - [MIND_ECOLI]	1.33499	0.733313	0.453388	0.840391	0.43043	0.632938	0.44703	1.22216	1.28159	0.923001	0.858682
P0A734	minE	Cell division topological specificity factor OS=Escherichia coli (strain K12) GN=minE PE=1 SV=1 - [MINE_ECOLI]	1.392	2.06935	1.41572	2.09907	1.24204	1.64419	2.13968	6.41386	4.95669	6.16808	0.84373
P03817	mioC	Protein MioC OS=Escherichia coli (strain K12) GN=mioC PE=1 SV=4 - [MIOC_ECOLI]	1.47928	1.03429	0.589809	1.73667	0.700197	0.739944	1.38117	6.48454	5.27775	7.20985	1.61734
P0A908	mipA	MltA-interacting protein OS=Escherichia coli (strain K12) GN=mipA PE=1 SV=1 - [MIPA_ECOLI]	0.584538	0.741872	0.291571	0.777985	0.417286	0.40681	0.650814	2.38424	2.05304	2.09585	1.15052
P76506	mlaA	Probable phospholipid-binding lipoprotein MlaA OS=Escherichia coli (strain K12) GN=mlaA PE=1 SV=1 - [MLAA_ECOLI]	0.791795	0.690995	0.442102	0.785702	0.52399	0.641974	0.435668	1.47596	1.25216	1.3934	0.808412
P64602	mlaB	Probable phospholipid ABC transporter-binding protein MlaB OS=Escherichia coli (strain K12) GN=mlaB PE=1 SV=1 - [MLAB_ECOLI]		4.87795	2.77204	2.93288	1.40412	2.95537
P0ADV7	mlaC	Probable phospholipid-binding protein MlaC OS=Escherichia coli (strain K12) GN=mlaC PE=1 SV=1 - [MLAC_ECOLI]	0.969937	0.858694	0.495549	1.03997	0.698169	0.611801	0.256944	1.28369	1.05443	1.1357	0.696777
P64604	mlaD	Probable phospholipid ABC transporter-binding protein MlaD OS=Escherichia coli (strain K12) GN=mlaD PE=1 SV=1 - [MLAD_ECOLI]	0.763659	0.818606	0.432087	0.759965	0.326603	0.711038	0.383543	1.55085	0.99863	1.24453	0.524821
P64606	mlaE	Probable phospholipid ABC transporter permease protein MlaE OS=Escherichia coli (strain K12) GN=mlaE PE=1 SV=1 - [MLAE_ECOLI]		0.564063	0.12296	0.612045	0.59412	0.253264
P63386	mlaF	Probable phospholipid import ATP-binding protein MlaF OS=Escherichia coli (strain K12) GN=mlaF PE=1 SV=1 - [MLAF_ECOLI]	1.76939	0.729753	0.46061	0.734675	0.389857	0.650776	0.32444	1.50818	1.10877	1.46452	0.63103
P50456	mlc	Protein mlc OS=Escherichia coli (strain K12) GN=mlc PE=1 SV=2 - [MLC_ECOLI]	1.16884	0.77484	0.425479	0.805837	0.601227	0.677476	0.51739	1.75282	1.61431	1.76982	0.884297
P0A935	mltA	Membrane-bound lytic murein transglycosylase A OS=Escherichia coli (strain K12) GN=mltA PE=1 SV=1 - [MLTA_ECOLI]	1.23334	0.696339	0.420735	0.876991	0.599814	0.678472	0.626034	1.64921	1.6806	1.5676	1.0642
P41052	mltB	Membrane-bound lytic murein transglycosylase B OS=Escherichia coli (strain K12) GN=mltB PE=1 SV=1 - [MLTB_ECOLI]	1.58423	1.2951	0.672829	2.03839	1.39922	0.722041
P0C066	mltC	Membrane-bound lytic murein transglycosylase C OS=Escherichia coli (strain K12) GN=mltC PE=2 SV=1 - [MLTC_ECOLI]	1.19299	0.723224	0.356536	1.08214	0.693607	0.684329	0.433898	1.58151	1.58302	1.82328	1.01895
Q47690	mmuM	Homocysteine S-methyltransferase OS=Escherichia coli (strain K12) GN=mmuM PE=1 SV=2 - [MMUM_ECOLI]	1.59909	0.810163	0.43796	1.25997	0.782549	0.761213	0.236459	1.38276	0.731193	1.17275	1.11371
P13669	mngR	Mannosyl-D-glycerate transport/metabolism system repressor MngR OS=Escherichia coli (strain K12) GN=mngR PE=1 SV=1 - [MNGR_ECOLI]	1.38512	0.803669	0.51963	0.895758	0.510684	0.814047
P25745	mnmA	tRNA-specific 2-thiouridylase MnmA OS=Escherichia coli (strain K12) GN=mnmA PE=1 SV=4 - [MNMA_ECOLI]	1.1775	0.756491	0.503384	1.07469	0.663355	0.800493
P77182	mnmC	tRNA 5-methylaminomethyl-2-thiouridine biosynthesis bifunctional protein MnmC OS=Escherichia coli (strain K12) GN=mnmC PE=1 SV=2 - [MNMC_ECOLI]	1.25967	0.76169	0.364921	1.09823	0.620237	0.509704	0.507269	1.24732	1.43518	1.25525	0.640655
P25522	mnmE	tRNA modification GTPase MnmE OS=Escherichia coli (strain K12) GN=mnmE PE=1 SV=3 - [MNME_ECOLI]	1.0415	0.863959	0.520517	1.19234	0.706351	0.721832	0.337537	1.0642	1.15569	1.04108	0.554455
P0A6U3	mnmG	tRNA uridine 5-carboxymethylaminomethyl modification enzyme MnmG OS=Escherichia coli (strain K12) GN=mnmG PE=1 SV=1 - [MNMG_ECOLI]	0.948849	0.685949	0.450774	0.604901	0.263189	0.742236	0.42749	1.31235	1.22599	1.22794	0.791102
P0A9F1	mntR	Transcriptional regulator MntR OS=Escherichia coli (strain K12) GN=mntR PE=1 SV=1 - [MNTR_ECOLI]	0.919491	0.465069	0.191424	0.70517	0.61844	0.416697	0.437451	1.41063	1.46278	1.41854	1.08414
P30745	moaA	Cyclic pyranopterin monophosphate synthase OS=Escherichia coli (strain K12) GN=moaA PE=1 SV=1 - [MOAA_ECOLI]	1.78553
P0AEZ9	moaB	Molybdenum cofactor biosynthesis protein B OS=Escherichia coli (strain K12) GN=moaB PE=1 SV=2 - [MOAB_ECOLI]	1.63673	1.39497	0.516788	2.2805	1.52165	0.739929
P0A738	moaC	Cyclic pyranopterin monophosphate synthase accessory protein OS=Escherichia coli (strain K12) GN=moaC PE=1 SV=2 - [MOAC_ECOLI]	1.61152	0.997592	0.528458	1.70668	1.84946	0.641757	0.340377	1.30313	1.33517	1.32877	0.753527
P30748	moaD	Molybdopterin synthase sulfur carrier subunit OS=Escherichia coli (strain K12) GN=moaD PE=1 SV=2 - [MOAD_ECOLI]	1.51476	0.886813	0.400206	1.4427	0.78636	0.441705
P30749	moaE	Molybdopterin synthase catalytic subunit OS=Escherichia coli (strain K12) GN=moaE PE=1 SV=3 - [MOAE_ECOLI]	1.91145	0.835438	0.471348	1.11696	0.681522	0.517678	0.334661	1.48162	1.67114	1.4431	0.646663
P32173	mobA	Molybdenum cofactor guanylyltransferase OS=Escherichia coli (strain K12) GN=mobA PE=1 SV=1 - [MOBA_ECOLI]	2.30941	1.7452	1.03869	2.39096	1.27995	1.19257
P32125	mobB	Molybdopterin-guanine dinucleotide biosynthesis adapter protein OS=Escherichia coli (strain K12) GN=mobB PE=1 SV=3 - [MOBB_ECOLI]	1.6285	3.28708	1.28164	3.58245	1.40224	1.06612
P37329	modA	Molybdate-binding periplasmic protein OS=Escherichia coli (strain K12) GN=modA PE=1 SV=1 - [MODA_ECOLI]	0.579728	0.553584	0.36709	0.228514	0.133357	0.877127	0.298813	1.61261	1.009	1.69634	1.27176
P0AF01	modB	Molybdenum transport system permease protein ModB OS=Escherichia coli (strain K12) GN=modB PE=1 SV=1 - [MODB_ECOLI]		0.7531	0.410247	0.565093	0.306277	0.876334	0.697783	1.26531	1.1741	1.39638	1.343
P09833	modC	Molybdenum import ATP-binding protein ModC OS=Escherichia coli (strain K12) GN=modC PE=3 SV=4 - [MODC_ECOLI]		0.710583	0.442288	0.399255	0.294639	0.627289	0.514517	1.07942	0.748933	1.3637	0.657505
P0A9G8	modE	Transcriptional regulator ModE OS=Escherichia coli (strain K12) GN=modE PE=1 SV=1 - [MODE_ECOLI]	1.55697	0.935245	0.48993	1.39063	0.842453	0.845578	0.661519	2.93878	2.45344	2.83329	1.01422
P31060	modF	Putative molybdenum transport ATP-binding protein ModF OS=Escherichia coli (strain K12) GN=modF PE=3 SV=2 - [MODF_ECOLI]	1.05762	0.78527	0.426261	0.76038	0.393893	0.875913
P12281	moeA	Molybdopterin molybdenumtransferase OS=Escherichia coli (strain K12) GN=moeA PE=1 SV=1 - [MOEA_ECOLI]	1.3837	0.910363	0.649792	1.72931	0.913125	0.806198
P12282	moeB	Molybdopterin-synthase adenylyltransferase OS=Escherichia coli (strain K12) GN=moeB PE=1 SV=1 - [MOEB_ECOLI]	1.2977	2.15854	1.16073	3.39497	1.95123	1.67873	0.478956	1.37652	1.31551	1.58511	1.01872
P0AF03	mog	Molybdopterin adenylyltransferase OS=Escherichia coli (strain K12) GN=mog PE=1 SV=1 - [MOG_ECOLI]	1.76897	0.830949	0.559134	1.36255	0.887818	0.777189	0.349159	1.16941	1.17704	1.139	0.742166
P0ACV6	mpaA	Protein MpaA OS=Escherichia coli (strain K12) GN=mpaA PE=4 SV=2 - [MPAA_ECOLI]	1.21112	0.274463	0.078412	0.627498	0.875114	0.386937
P37773	mpl	UDP-N-acetylmuramate:L-alanyl-gamma-D-glutamyl-meso-diaminopimelate ligase OS=Escherichia coli (strain K12) GN=mpl PE=1 SV=3 - [MPL_ECOLI]	1.28006	0.808113	0.511281	1.11692	0.732776	0.724657	0.479562	1.38478	1.32212	1.28077	0.873473
P77348	mppA	Periplasmic murein peptide-binding protein OS=Escherichia coli (strain K12) GN=mppA PE=1 SV=2 - [MPPA_ECOLI]	0.848825	0.670488	0.422889	0.89484	0.488366	0.794303
P0ACR9	mprA	Transcriptional repressor MprA OS=Escherichia coli (strain K12) GN=mprA PE=2 SV=1 - [MPRA_ECOLI]	1.23713	1.53068	0.738652	1.61033	0.881524	0.98068	0.163082	1.30794	1.13852	1.27779	0.739567
P33940	mqo	Malate:quinone oxidoreductase OS=Escherichia coli (strain K12) GN=mqo PE=1 SV=2 - [MQO_ECOLI]	0.869835	0.53368	0.404062	1.13689	0.601627	1.1925	2.1091	2.05321	5.56461	3.7634	7.0069
P22186	mraZ	Protein MraZ OS=Escherichia coli (strain K12) GN=mraZ PE=3 SV=1 - [MRAZ_ECOLI]							0.210683	1.45571	0.916268	1.0453	0.495337
P02918	mrcA	Penicillin-binding protein 1A OS=Escherichia coli (strain K12) GN=mrcA PE=1 SV=1 - [PBPA_ECOLI]	1.32595	0.999299	0.588923	1.10155	0.521837	0.733351
P02919-2	mrcB	Isoform Gamma of Penicillin-binding protein 1B OS=Escherichia coli (strain K12) GN=mrcB - [PBPB_ECOLI]		1.00317	0.687633	1.32957	0.820317	1.19967	0.260778	1.20048	1.11813	1.20687	0.684754
P0A9X4	mreB	Rod shape-determining protein MreB OS=Escherichia coli (strain K12) GN=mreB PE=1 SV=1 - [MREB_ECOLI]	2.37382	0.76889	0.526133	1.72474	1.03123	0.968114	0.466549	1.53627	1.4585	1.14587	0.886407
P0AF08	mrp	Protein mrp OS=Escherichia coli (strain K12) GN=mrp PE=3 SV=1 - [MRP_ECOLI]	1.86322	0.768478	0.470366	1.18704	0.579246	0.676865
P24202	mrr	Mrr restriction system protein OS=Escherichia coli (strain K12) GN=mrr PE=1 SV=1 - [MRR_ECOLI]	0.873754	0.912107	0.628652	0.846364	0.440903	0.758293	0.561709	1.89315	1.66879	2.02275	1.01963
P60752	msbA	Lipid A export ATP-binding/permease protein MsbA OS=Escherichia coli (strain K12) GN=msbA PE=1 SV=1 - [MSBA_ECOLI]	1.4146	0.655951	0.495646	0.658872	0.306066	0.758464	0.410869	1.30491	1.28258	1.31967	0.785823
P24205	msbB	Lipid A biosynthesis (KDO)2-(lauroyl)-lipid IVA acyltransferase OS=Escherichia coli (strain K12) GN=msbB PE=1 SV=1 - [MSBB_ECOLI]	1.62448	0.752127	0.367378	0.877046	0.58732	0.598878
P77338	mscK	Potassium efflux system KefA OS=Escherichia coli (strain K12) GN=kefA PE=1 SV=1 - [KEFA_ECOLI]	1.64453	1.22253	0.792282	1.43721	0.678747	0.669035	0.626353	1.7633	1.48086	1.78698	1.09662
P0A742	mscL	Large-conductance mechanosensitive channel OS=Escherichia coli (strain K12) GN=mscL PE=1 SV=1 - [MSCL_ECOLI]	1.37394	0.4752	0.153197	0.567563	0.438245	0.26197
P39285	mscM	Uncharacterized MscS family protein YjeP OS=Escherichia coli (strain K12) GN=yjeP PE=3 SV=3 - [YJEP_ECOLI]		0.851884	0.600362	1.5068	0.839928	0.81727
P0C0S1	mscS	Small-conductance mechanosensitive channel OS=Escherichia coli (strain K12) GN=mscS PE=1 SV=1 - [MSCS_ECOLI]	1.61762	0.891532	0.377261	0.450725	0.252391	0.512772	0.279232	0.881035	0.480192	0.59147	0.314279
P0A744	msrA	Peptide methionine sulfoxide reductase MsrA OS=Escherichia coli (strain K12) GN=msrA PE=1 SV=2 - [MSRA_ECOLI]	1.82107	1.12631	0.598834	1.19452	0.877176	0.825085	0.611377	2.47877	1.86697	2.4626	1.18956
P0A746	msrB	Peptide methionine sulfoxide reductase MsrB OS=Escherichia coli (strain K12) GN=msrB PE=1 SV=1 - [MSRB_ECOLI]	1.46233	1.16668	0.719913	1.48388	0.656568	0.962401
P76270	msrC	Free methionine-R-sulfoxide reductase OS=Escherichia coli (strain K12) GN=msrC PE=1 SV=2 - [MSRC_ECOLI]	0.80562	0.748722	0.487622	0.741086	0.34221	0.693006	0.362347	1.01394	0.937574	1.47125	0.714634
P25738	msyB	Acidic protein MsyB OS=Escherichia coli (strain K12) GN=msyB PE=4 SV=1 - [MSYB_ECOLI]	2.46025						0.415583	0.970109	0.643061	0.73749	0.673904
P76346	mtfA	Protein MtfA OS=Escherichia coli (strain K12) GN=mtfA PE=1 SV=2 - [MTFA_ECOLI]	1.42674	1.14041	0.596687	1.63538	0.907355	0.609012
P00550	mtlA	PTS system mannitol-specific EIICBA component OS=Escherichia coli (strain K12) GN=mtlA PE=1 SV=1 - [PTM3C_ECOLI]		0.839337	0.399734	0.615122	0.318141	0.825052
P09424	mtlD	Mannitol-1-phosphate 5-dehydrogenase OS=Escherichia coli (strain K12) GN=mtlD PE=1 SV=3 - [MTLD_ECOLI]	1.97099	0.876424	0.347194	1.11146	1.23466	0.563694	0.327318	1.40307	1.17288	1.37231	0.624654
P0AF10	mtlR	Mannitol operon repressor OS=Escherichia coli (strain K12) GN=mtlR PE=1 SV=1 - [MTLR_ECOLI]	1.13307	1.1578	0.662582	1.23102	0.81122	0.678735
P0AF12	mtnN	5'-methylthioadenosine/S-adenosylhomocysteine nucleosidase OS=Escherichia coli (strain K12) GN=mtnN PE=1 SV=1 - [MTNN_ECOLI]	2.3385	0.911641	0.525394	1.44148	0.713978	0.811144	0.345589	1.32327	1.46476	1.0836	0.987914
P0AAD2	mtr	Tryptophan-specific transport protein OS=Escherichia coli (strain K12) GN=mtr PE=1 SV=1 - [MTR_ECOLI]	2.14793	0.996262	0.701715	1.94485	0.925368	0.961634
P0A9H1	mug	G/U mismatch-specific DNA glycosylase OS=Escherichia coli (strain K12) GN=mug PE=1 SV=1 - [MUG_ECOLI]	1.96951	0.876465	0.352434	0.870125	0.84742	0.642948	0.30053	1.22403	1.0029	1.10124	0.779049
P22523	mukB	Chromosome partition protein MukB OS=Escherichia coli (strain K12) GN=mukB PE=1 SV=2 - [MUKB_ECOLI]	1.17994	0.631084	0.462311	0.856493	0.466496	0.908205	0.495155	1.52279	1.19645	1.40967	0.985035
P22524	mukE	Chromosome partition protein MukE OS=Escherichia coli (strain K12) GN=mukE PE=1 SV=5 - [MUKE_ECOLI]	1.09869	0.55314	0.207077	0.548724	0.35308	0.359088
P60293	mukF	Chromosome partition protein MukF OS=Escherichia coli (strain K12) GN=mukF PE=1 SV=1 - [MUKF_ECOLI]	1.50398	1.07431	0.730668	0.858549	0.361894	1.02044	0.651333	3.39207	2.25446	3.47996	0.791939
P0A749	murA	UDP-N-acetylglucosamine 1-carboxyvinyltransferase OS=Escherichia coli (strain K12) GN=murA PE=1 SV=1 - [MURA_ECOLI]	1.47597	0.72505	0.410223	1.04215	0.844562	0.648108	0.664612	2.05632	2.12917	2.24121	0.973171
P08373	murB	UDP-N-acetylenolpyruvoylglucosamine reductase OS=Escherichia coli (strain K12) GN=murB PE=1 SV=1 - [MURB_ECOLI]	1.33371	0.976142	0.535299	1.22264	0.946979	0.775073
P17952	murC	UDP-N-acetylmuramate--L-alanine ligase OS=Escherichia coli (strain K12) GN=murC PE=1 SV=2 - [MURC_ECOLI]	1.4122	0.778454	0.566404	1.0258	0.710192	0.845641	0.436196	1.22636	1.18721	1.1403	0.749024
P14900	murD	UDP-N-acetylmuramoylalanine--D-glutamate ligase OS=Escherichia coli (strain K12) GN=murD PE=1 SV=3 - [MURD_ECOLI]	1.22605	0.852639	0.496034	0.99283	0.620368	0.738189	0.514954	2.37711	1.20001	1.90181	0.882205
P22188	murE	UDP-N-acetylmuramoyl-L-alanyl-D-glutamate--2,6-diaminopimelate ligase OS=Escherichia coli (strain K12) GN=murE PE=1 SV=2 - [MURE_ECOLI]	1.14598	0.910672	0.564674	1.05094	0.553751	0.79029	0.311747	1.34233	1.10255	1.37301	0.864947
P11880	murF	UDP-N-acetylmuramoyl-tripeptide--D-alanyl-D-alanine ligase OS=Escherichia coli (strain K12) GN=murF PE=1 SV=2 - [MURF_ECOLI]	1.25063	0.714248	0.400166	0.933783	0.653228	0.573733	0.378131	1.37856	1.41803	1.34586	0.680641
P17443	murG	UDP-N-acetylglucosamine--N-acetylmuramyl-(pentapeptide) pyrophosphoryl-undecaprenol N-acetylglucosamine transferase OS=Escherichia coli (strain K12) GN=murG PE=1 SV=3 - [MURG_ECOLI]	1.16085	0.683363	0.39028	0.739353	0.489058	0.546325
P22634	murI	Glutamate racemase OS=Escherichia coli (strain K12) GN=murI PE=1 SV=2 - [MURI_ECOLI]	2.10848	0.821419	0.470784	1.03744	0.758762	0.675275	0.409368	1.46912	1.58598	1.48548	0.977016
P76535	murQ	N-acetylmuramic acid 6-phosphate etherase OS=Escherichia coli (strain K12) GN=murQ PE=1 SV=1 - [MURQ_ECOLI]	0.968321	0.990882	0.640671	1.48495	0.742254	1.07559	0.267699	1.84976	1.46834	1.72413	1.18098
P05523	mutM	Formamidopyrimidine-DNA glycosylase OS=Escherichia coli (strain K12) GN=mutM PE=1 SV=3 - [FPG_ECOLI]	1.99781	1.70873	1.2058	2.24887	1.15725	1.0301
P23909	mutS	DNA mismatch repair protein MutS OS=Escherichia coli (strain K12) GN=mutS PE=1 SV=1 - [MUTS_ECOLI]	1.02685	0.799326	0.472309	0.980615	0.579864	0.778314	0.542869	1.18065	1.17126	1.26828	0.951771
P08337	mutT	8-oxo-dGTP diphosphatase OS=Escherichia coli (strain K12) GN=mutT PE=1 SV=1 - [MUTT_ECOLI]	1.08152	0.651728	0.363872	1.05763	0.682137	0.632796
P17802	mutY	A/G-specific adenine glycosylase OS=Escherichia coli (strain K12) GN=mutY PE=1 SV=1 - [MUTY_ECOLI]	0.947934	0.602521			0.734367	0.674334
P11458	nadA	Quinolinate synthase A OS=Escherichia coli (strain K12) GN=nadA PE=1 SV=3 - [NADA_ECOLI]	0.411685	0.612901	0.617315	0.604524	0.334655	0.752499
P10902	nadB	L-aspartate oxidase OS=Escherichia coli (strain K12) GN=nadB PE=1 SV=4 - [NADB_ECOLI]	0.396221	0.511766	0.547413	0.494286	0.267437	0.913012	0.337618	1.31633	1.2434	1.69154	0.869373
P30011	nadC	Nicotinate-nucleotide pyrophosphorylase [carboxylating] OS=Escherichia coli (strain K12) GN=nadC PE=3 SV=7 - [NADC_ECOLI]	1.33474	0.716126	0.435487	0.970399	0.579774	0.755283	0.432104	1.38832	1.51728	1.45884	0.931289
P18843	nadE	NH(3)-dependent NAD(+) synthetase OS=Escherichia coli (strain K12) GN=nadE PE=1 SV=2 - [NADE_ECOLI]	1.33703	1.0185	0.573166	0.985984	0.604183	0.764855	0.485449	1.19302	1.13981	1.28905	0.881768
P0AF18	nagA	N-acetylglucosamine-6-phosphate deacetylase OS=Escherichia coli (strain K12) GN=nagA PE=1 SV=1 - [NAGA_ECOLI]	0.738433	0.831901	0.437013	0.728946	0.414796	0.638353	0.222833	1.23229	0.903972	1.2069	0.953878
P0A759	nagB	Glucosamine-6-phosphate deaminase OS=Escherichia coli (strain K12) GN=nagB PE=1 SV=1 - [NAGB_ECOLI]	0.639827	1.04925	0.501663	0.844122	0.487832	0.878163	0.521764	1.20543	1.02944	1.47006	0.898019
P0AF20	nagC	N-acetylglucosamine repressor OS=Escherichia coli (strain K12) GN=nagC PE=2 SV=1 - [NAGC_ECOLI]	1.10203	0.671866	0.300385	0.915637	0.789381	0.55265	1.31003	1.68801	1.84402	1.55464	0.83756
P0AF24	nagD	Ribonucleotide monophosphatase NagD OS=Escherichia coli (strain K12) GN=nagD PE=1 SV=1 - [NAGD_ECOLI]	0.945835	0.971065	0.487235	1.0986	0.604385	0.802886
P09323	nagE	PTS system N-acetylglucosamine-specific EIICBA component OS=Escherichia coli (strain K12) GN=nagE PE=4 SV=1 - [PTW3C_ECOLI]	0.906941	0.865903	0.542195	0.752519	0.369818	0.755719	0.349896	1.28204	1.03633	1.20989	0.72909
P75959	nagK	N-acetyl-D-glucosamine kinase OS=Escherichia coli (strain K12) GN=nagK PE=1 SV=1 - [NAGK_ECOLI]	1.67063	0.81514	0.43893	1.17402	0.727709	0.767502
P75949	nagZ	Beta-hexosaminidase OS=Escherichia coli (strain K12) GN=nagZ PE=1 SV=1 - [NAGZ_ECOLI]	1.21679	0.850884	0.503925	1.26023	0.682841	0.838664
P0A6L4	nanA	N-acetylneuraminate lyase OS=Escherichia coli (strain K12) GN=nanA PE=1 SV=2 - [NANA_ECOLI]		1.43271	0.509898	1.09541	1.19439	1.30006
P0A761	nanE	Putative N-acetylmannosamine-6-phosphate 2-epimerase OS=Escherichia coli (strain K12) GN=nanE PE=1 SV=1 - [NANE_ECOLI]	1.59432	3.27249	1.55033	4.40923	2.27844	2.25672	1.60152	4.32054	3.94908	3.78457	0.881525
P45425	nanK	N-acetylmannosamine kinase OS=Escherichia coli (strain K12) GN=nanK PE=1 SV=2 - [NANK_ECOLI]	1.41791
P39371	nanM	N-acetylneuraminate epimerase OS=Escherichia coli (strain K12) GN=nanM PE=1 SV=2 - [NANM_ECOLI]	1.25091	0.795319	0.235729	0.545586	0.387055	0.38143	0.163829	0.666135	0.362432	0.702974	0.520873
P0A8W0	nanR	Transcriptional regulator NanR OS=Escherichia coli (strain K12) GN=nanR PE=3 SV=1 - [NANR_ECOLI]	1.3923	0.972427	0.479887	1.19555	0.649834	0.649339
P33937	napA	Periplasmic nitrate reductase OS=Escherichia coli (strain K12) GN=napA PE=1 SV=3 - [NAPA_ECOLI]	0.44929	1.24037	0.927869	2.84002	1.68314	1.49836	0.40884	3.19789	1.64547	3.83817	1.21972
P0ABL3	napB	Periplasmic nitrate reductase, electron transfer subunit OS=Escherichia coli (strain K12) GN=napB PE=1 SV=1 - [NAPB_ECOLI]		1.4075	0.887476	1.77579	0.795477	1.28294
P09152	narG	Respiratory nitrate reductase 1 alpha chain OS=Escherichia coli (strain K12) GN=narG PE=1 SV=4 - [NARG_ECOLI]		1.33208	1.21758	1.79628	0.953617	1.30308
P11349	narH	Respiratory nitrate reductase 1 beta chain OS=Escherichia coli (strain K12) GN=narH PE=1 SV=3 - [NARH_ECOLI]		1.71943	1.23299	2.46927	0.805832	1.10948	0.468347	1.23895	1.20132	1.14789	0.766354
P0AF26	narJ	Nitrate reductase molybdenum cofactor assembly chaperone NarJ OS=Escherichia coli (strain K12) GN=narJ PE=1 SV=1 - [NARJ_ECOLI]							0.215004	6.50578	2.47845	4.6399	0.644388
P0AF28	narL	Nitrate/nitrite response regulator protein NarL OS=Escherichia coli (strain K12) GN=narL PE=1 SV=1 - [NARL_ECOLI]	1.31203	0.899064	0.463272	1.13908	0.700352	0.686101	0.504239	1.21111	1.20809	1.33739	0.868403
P31802	narP	Nitrate/nitrite response regulator protein NarP OS=Escherichia coli (strain K12) GN=narP PE=3 SV=1 - [NARP_ECOLI]	0.889923	0.872946	0.466957	0.890007	0.669767	0.610491	0.473381	2.37105	1.81253	1.86947	1.30115
P37758	narU	Nitrite extrusion protein 2 OS=Escherichia coli (strain K12) GN=narU PE=1 SV=3 - [NARU_ECOLI]							0.602623	1.74794	2.48174	2.35401	1.37482
P19319	narZ	Respiratory nitrate reductase 2 alpha chain OS=Escherichia coli (strain K12) GN=narZ PE=1 SV=5 - [NARZ_ECOLI]							0.264547	3.12932	1.4332	2.41323	0.530542
P00393	ndh	NADH dehydrogenase OS=Escherichia coli (strain K12) GN=ndh PE=1 SV=2 - [DHNA_ECOLI]	1.46261	1.07233	0.61549	1.49392	0.589031	0.790414	0.244564	1.52979	1.46616	1.39299	0.722596
P0A763	ndk	Nucleoside diphosphate kinase OS=Escherichia coli (strain K12) GN=ndk PE=1 SV=2 - [NDK_ECOLI]	1.08261	0.967985	0.404796	1.13523	0.537098	0.773763	0.484795	0.841016	0.970415	0.714918	0.808105
P50465	nei	Endonuclease 8 OS=Escherichia coli (strain K12) GN=nei PE=1 SV=3 - [END8_ECOLI]	0.9872						0.709546	4.00763	3.45422	4.57992	0.944829
P77258	nemA	N-ethylmaleimide reductase OS=Escherichia coli (strain K12) GN=nemA PE=1 SV=1 - [NEMA_ECOLI]	1.11427	0.546484	0.417122	0.70586	0.456305	0.646037
P67430	nemR	HTH-type transcriptional repressor NemR OS=Escherichia coli (strain K12) GN=nemR PE=1 SV=1 - [NEMR_ECOLI]	1.09906
P68739	nfi	Endonuclease V OS=Escherichia coli (strain K12) GN=nfi PE=1 SV=1 - [NFI_ECOLI]	2.06074	0.773434	0.392835	1.26104	1.42519	0.584201
P38489	nfnB	Oxygen-insensitive NAD(P)H nitroreductase OS=Escherichia coli (strain K12) GN=nfnB PE=1 SV=1 - [NFNB_ECOLI]	1.74265	0.81153	0.938871	1.13397	0.655379	0.836023	0.388743	1.70546	1.48279	1.78853	0.981117
P0A6C1	nfo	Endonuclease 4 OS=Escherichia coli (strain K12) GN=nfo PE=1 SV=1 - [END4_ECOLI]	2.05694	0.885173	0.594312	1.59061	1.25695	0.735711	0.379274	1.87333	1.73618	1.79026	0.767635
P31600	nfrA	Bacteriophage N4 adsorption protein A OS=Escherichia coli (strain K12) GN=nfrA PE=4 SV=1 - [NFRA_ECOLI]	1.25636	0.845082	0.413215	1.0375	0.764443	0.679777
P17117	nfsA	Oxygen-insensitive NADPH nitroreductase OS=Escherichia coli (strain K12) GN=nfsA PE=1 SV=2 - [NFSA_ECOLI]	0.941918	1.11034	1.82344	1.26575	0.988272	1.30717
P63020	nfuA	Fe/S biogenesis protein NfuA OS=Escherichia coli (strain K12) GN=nfuA PE=1 SV=1 - [NFUA_ECOLI]	1.68214	1.10447	0.713968	1.75019	0.706893	0.731939	0.434045	1.91628	1.86715	1.92238	1.13452
P77567	nhoA	N-hydroxyarylamine O-acetyltransferase OS=Escherichia coli (strain K12) GN=nhoA PE=3 SV=1 - [NHOA_ECOLI]	1.48664
P33590	nikA	Nickel-binding periplasmic protein OS=Escherichia coli (strain K12) GN=nikA PE=1 SV=1 - [NIKA_ECOLI]	1.24434	0.981379	0.583802	2.30785	1.57565	1.08087	0.402186	1.80209	1.63232	1.7324	1.08745
P33594	nikE	Nickel import ATP-binding protein NikE OS=Escherichia coli (strain K12) GN=nikE PE=3 SV=2 - [NIKE_ECOLI]							0.401582	1.45382	1.33675	1.28501	0.830279
P0A6Z6	nikR	Nickel-responsive regulator OS=Escherichia coli (strain K12) GN=nikR PE=1 SV=1 - [NIKR_ECOLI]	1.39125
P08201	nirB	Nitrite reductase [NAD(P)H] large subunit OS=Escherichia coli (strain K12) GN=nirB PE=3 SV=4 - [NIRB_ECOLI]		1.13671	1.08511	1.54232	0.677907	1.86697	0.332546	1.82059	1.36571	1.91094	0.90134
P04846	nlpA	Lipoprotein 28 OS=Escherichia coli (strain K12) GN=nlpA PE=1 SV=1 - [NLPA_ECOLI]	1.0262	1.06198	0.794185	0.822012	0.419891	0.821243	0.4543	1.73228	1.2235	1.80132	1.04035
P0ADA3	nlpD	Murein hydrolase activator NlpD OS=Escherichia coli (strain K12) GN=nlpD PE=1 SV=1 - [NLPD_ECOLI]	1.68478	0.793735	0.389006	1.04434	0.663272	0.57485	0.255423	0.864515	0.960044	0.791735	0.63392
P40710	nlpE	Lipoprotein NlpE OS=Escherichia coli (strain K12) GN=nlpE PE=1 SV=1 - [NLPE_ECOLI]	1.1894	1.77527	1.00015	1.90036	0.733846	0.950008	0.317712	1.02299	0.953504	1.06955	0.77858
P0AFB1	nlpI	Lipoprotein NlpI OS=Escherichia coli (strain K12) GN=nlpI PE=1 SV=1 - [NLPI_ECOLI]	1.09637	0.741946	0.424043	0.992324	0.730083	0.760913	0.457799	1.22788	1.34785	1.38155	0.907865
P31806	nnr	Bifunctional NAD(P)H-hydrate repair enzyme Nnr OS=Escherichia coli (strain K12) GN=nnr PE=1 SV=2 - [NNR_ECOLI]	1.86602	0.772021	0.260809	0.445727	0.240301	0.412885
P00452	nrdA	Ribonucleoside-diphosphate reductase 1 subunit alpha OS=Escherichia coli (strain K12) GN=nrdA PE=1 SV=2 - [RIR1_ECOLI]	2.72908	0.98885	0.447729	1.82169	1.56378	0.716206
P00452-2	nrdA	Isoform Alpha' of Ribonucleoside-diphosphate reductase 1 subunit alpha OS=Escherichia coli (strain K12) GN=nrdA - [RIR1_ECOLI]							0.383314	1.21803	1.29288	1.16535	0.793938
P69924	nrdB	Ribonucleoside-diphosphate reductase 1 subunit beta OS=Escherichia coli (strain K12) GN=nrdB PE=1 SV=2 - [RIR2_ECOLI]	2.63972	1.04314	0.560948	1.78815	1.21642	0.833033	0.12525	1.82264	1.65919	1.67781	0.930411
P28903	nrdD	Anaerobic ribonucleoside-triphosphate reductase OS=Escherichia coli (strain K12) GN=nrdD PE=1 SV=2 - [NRDD_ECOLI]		1.42347	0.683203	2.40528	1.91107	0.974949	0.338542	3.08664	1.63113	2.38291	0.938647
P39452	nrdE	Ribonucleoside-diphosphate reductase 2 subunit alpha OS=Escherichia coli (strain K12) GN=nrdE PE=3 SV=3 - [RIR3_ECOLI]	1.05087	0.249038	0.13697	0.59315	0.616342	0.233653	0.509566	1.05631	1.37075	0.845315	1.41813
P37146	nrdF	Ribonucleoside-diphosphate reductase 2 subunit beta OS=Escherichia coli (strain K12) GN=nrdF PE=1 SV=2 - [RIR4_ECOLI]	1.41458	1.52291	0.785542	3.11389	2.07082	0.923936
P0A8D0	nrdR	Transcriptional repressor NrdR OS=Escherichia coli (strain K12) GN=nrdR PE=1 SV=1 - [NRDR_ECOLI]	1.89908	0.844929	0.46441	1.39231	0.845347	0.634656	0.678498	4.68484	3.57669	4.62919	0.808574
P0ABK9	nrfA	Cytochrome c-552 OS=Escherichia coli (strain K12) GN=nrfA PE=1 SV=1 - [NRFA_ECOLI]		1.73012	1.07153	4.3587	1.37641	2.91453
P0AF63	nsrR	HTH-type transcriptional repressor NsrR OS=Escherichia coli (strain K12) GN=nsrR PE=1 SV=1 - [NSRR_ECOLI]	1.12044	0.765768	0.447371	1.05068	0.53623	0.929969
P0AB83	nth	Endonuclease III OS=Escherichia coli (strain K12) GN=nth PE=1 SV=1 - [END3_ECOLI]	1.0854
P0AFC0	nudB	Dihydroneopterin triphosphate pyrophosphatase OS=Escherichia coli (strain K12) GN=nudB PE=1 SV=1 - [NUDB_ECOLI]	1.44706	0.864587	0.469234	1.25458	0.899373	0.78401
P32664	nudC	NADH pyrophosphatase OS=Escherichia coli (strain K12) GN=nudC PE=1 SV=2 - [NUDC_ECOLI]	1.58792	0.779437	0.438598	1.2138	0.826139	0.557421	0.337164	1.27094	1.35212	1.16058	0.68678
P45799	nudE	ADP compounds hydrolase NudE OS=Escherichia coli (strain K12) GN=nudE PE=1 SV=1 - [NUDE_ECOLI]	2.43196	0.711233	0.379151	1.07094	0.82421	0.582433	0.444165	1.32198	1.43947	1.32352	0.885672
Q93K97	nudF	ADP-ribose pyrophosphatase OS=Escherichia coli (strain K12) GN=nudF PE=1 SV=2 - [ADPP_ECOLI]	1.09346						0.39456	1.43194	1.35931	1.36604	1.00563
P77788	nudG	CTP pyrophosphohydrolase OS=Escherichia coli (strain K12) GN=nudG PE=1 SV=1 - [NUDG_ECOLI]	1.01564						0.242016	1.3741	0.902476	1.51259	0.888492
P0AEI6	nudJ	Phosphatase NudJ OS=Escherichia coli (strain K12) GN=nudJ PE=1 SV=1 - [NUDJ_ECOLI]	1.69405						0.0946081	1.2532	1.09904	1.19011	0.838379
P37128	nudK	GDP-mannose pyrophosphatase NudK OS=Escherichia coli (strain K12) GN=nudK PE=1 SV=2 - [NUDK_ECOLI]	1.53509	0.900214	0.645116	1.30971	0.702074	0.874604	0.605542	1.86948	1.87528	1.86245	0.77334
P0AFC3	nuoA	NADH-quinone oxidoreductase subunit A OS=Escherichia coli (strain K12) GN=nuoA PE=3 SV=1 - [NUOA_ECOLI]	1.18851
P0AFC7	nuoB	NADH-quinone oxidoreductase subunit B OS=Escherichia coli (strain K12) GN=nuoB PE=1 SV=1 - [NUOB_ECOLI]	1.50652	0.83512	1.38309	1.9468	1.5394	1.00387	0.339031	1.54628	1.45936	1.67475	0.571488
P33599	nuoC	NADH-quinone oxidoreductase subunit C/D OS=Escherichia coli (strain K12) GN=nuoC PE=1 SV=3 - [NUOCD_ECOLI]	0.878898	1.03539	0.48389	0.752292	0.336444	1.05875	0.216908	1.41995	1.38912	1.43263	1.02161
P0AFD1	nuoE	NADH-quinone oxidoreductase subunit E OS=Escherichia coli (strain K12) GN=nuoE PE=1 SV=1 - [NUOE_ECOLI]	1.19786	1.24894	0.710011	1.56018	0.534708	0.968578
P31979	nuoF	NADH-quinone oxidoreductase subunit F OS=Escherichia coli (strain K12) GN=nuoF PE=1 SV=3 - [NUOF_ECOLI]	1.08953	0.980437	0.492001	1.02543	0.686934	0.723887	0.431333	1.42541	1.35102	1.45112	0.806232
P33602	nuoG	NADH-quinone oxidoreductase subunit G OS=Escherichia coli (strain K12) GN=nuoG PE=1 SV=4 - [NUOG_ECOLI]	0.843822	0.844109	0.449228	0.865462	0.464314	0.763845
P0AFD4	nuoH	NADH-quinone oxidoreductase subunit H OS=Escherichia coli (strain K12) GN=nuoH PE=1 SV=1 - [NUOH_ECOLI]	1.17028
P0AFD6	nuoI	NADH-quinone oxidoreductase subunit I OS=Escherichia coli (strain K12) GN=nuoI PE=1 SV=1 - [NUOI_ECOLI]	1.99966	0.864189	0.546202	1.0615	0.439633	1.00952	0.633073	3.12902	2.55348	3.29296	0.852765
P0AFE0	nuoJ	NADH-quinone oxidoreductase subunit J OS=Escherichia coli (strain K12) GN=nuoJ PE=1 SV=1 - [NUOJ_ECOLI]		1.23014	0.783091	0.811012	0.300896	1.13561
P0AFE8	nuoM	NADH-quinone oxidoreductase subunit M OS=Escherichia coli (strain K12) GN=nuoM PE=1 SV=1 - [NUOM_ECOLI]		0.762406	0.427803	0.769303	0.521605	0.711021
P0AFF2	nupC	Nucleoside permease NupC OS=Escherichia coli (strain K12) GN=nupC PE=1 SV=1 - [NUPC_ECOLI]		1.5055	0.812597	1.73274	1.18533	1.1747
P0AFF6	nusA	Transcription elongation protein NusA OS=Escherichia coli (strain K12) GN=nusA PE=1 SV=1 - [NUSA_ECOLI]	0.792343	0.821415	0.562031	0.924184	0.443194	0.912269	0.338568	1.47581	1.21332	1.71307	2.57233
P0A780	nusB	N utilization substance protein B OS=Escherichia coli (strain K12) GN=nusB PE=1 SV=1 - [NUSB_ECOLI]	1.02801	0.939867	0.624503	1.25551	0.638127	0.772244	0.149779	1.7277	1.34352	1.53398	0.953551
P0AFG0	nusG	Transcription antitermination protein NusG OS=Escherichia coli (strain K12) GN=nusG PE=1 SV=2 - [NUSG_ECOLI]	1.44175	0.914551	0.63133	0.896431	0.435452	0.776588	0.392186	3.23737	2.69781	3.61179	1.11993
P42641	obgE	GTPase ObgE/CgtA OS=Escherichia coli (strain K12) GN=obgE PE=1 SV=1 - [OBG_ECOLI]	1.25964	0.796318	0.411143	1.11923	0.890656	0.434279	0.655749	2.22519	2.34197	2.55039	0.982262
P0A910	ompA	Outer membrane protein A OS=Escherichia coli (strain K12) GN=ompA PE=1 SV=1 - [OMPA_ECOLI]	0.987223	0.661902	0.375492	1.12834	0.66089	1.00771	0.572217	1.51741	1.33345	1.39359	1.66391
P06996	ompC	Outer membrane protein C OS=Escherichia coli (strain K12) GN=ompC PE=1 SV=1 - [OMPC_ECOLI]	2.71457	0.77967	0.490267	0.949665	2.37923	0.731069	0.51759	1.9245	1.93192	1.8161	1.56973
P02931	ompF	Outer membrane protein F OS=Escherichia coli (strain K12) GN=ompF PE=1 SV=1 - [OMPF_ECOLI]	1.21093	0.345395	0.181018	0.479919	0.395253	1.44527	0.859681	1.3579	1.73475	1.77446	3.19361
P76773	ompL	Porin OmpL OS=Escherichia coli (strain K12) GN=ompL PE=1 SV=1 - [OMPL_ECOLI]		0.6851	0.376226	1.02934	0.798074	0.661521
P0AA16	ompR	Transcriptional regulatory protein OmpR OS=Escherichia coli (strain K12) GN=ompR PE=1 SV=1 - [OMPR_ECOLI]	1.80524	0.9479	0.444756	1.19721	0.796445	0.697956	0.565068	1.78778	1.53229	1.27619	1.28334
P09169	ompT	Protease 7 OS=Escherichia coli (strain K12) GN=ompT PE=1 SV=1 - [OMPT_ECOLI]	0.290625	1.50297	0.826614	1.10659	0.375339	0.776565	0.525766	2.51536	2.05266	2.44308	0.828895
P0A915	ompW	Outer membrane protein W OS=Escherichia coli (strain K12) GN=ompW PE=1 SV=1 - [OMPW_ECOLI]	0.642263						0.570168	5.18646	1.92709	5.03503	1.20283
P0A917	ompX	Outer membrane protein X OS=Escherichia coli (strain K12) GN=ompX PE=1 SV=1 - [OMPX_ECOLI]	2.3067	1.41723	0.415846	1.36338	1.00051	0.687473
P23843	oppA	Periplasmic oligopeptide-binding protein OS=Escherichia coli (strain K12) GN=oppA PE=1 SV=2 - [OPPA_ECOLI]	0.765136	0.764829	0.4438	0.674803	0.274336	0.897155	0.33322	1.35518	1.08271	1.38903	0.97017
P0AFH2	oppB	Oligopeptide transport system permease protein OppB OS=Escherichia coli (strain K12) GN=oppB PE=1 SV=1 - [OPPB_ECOLI]		0.798593	0.58157	0.856832	0.439182	1.1435
P0AFH6	oppC	Oligopeptide transport system permease protein OppC OS=Escherichia coli (strain K12) GN=oppC PE=1 SV=1 - [OPPC_ECOLI]	0.745657	1.05187	0.593012	0.887038	0.421941	1.21828
P76027	oppD	Oligopeptide transport ATP-binding protein OppD OS=Escherichia coli (strain K12) GN=oppD PE=3 SV=2 - [OPPD_ECOLI]	0.880553	0.771323	0.453499	0.939374	0.492527	1.10398	0.109593	1.33569	1.2062	1.39642	1.12165
P77737	oppF	Oligopeptide transport ATP-binding protein OppF OS=Escherichia coli (strain K12) GN=oppF PE=3 SV=1 - [OPPF_ECOLI]	0.761257	0.755858	0.452435	0.866904	0.554477	0.923391	0.369299	2.11614	1.67985	2.51552	1.12352
P0A784	orn	Oligoribonuclease OS=Escherichia coli (strain K12) GN=orn PE=1 SV=2 - [ORN_ECOLI]	1.94002	1.24197	0.787574	1.74734	0.796822	0.808338	0.488883	1.53311	1.37168	1.48889	0.921224
P0C0L2	osmC	Peroxiredoxin OsmC OS=Escherichia coli (strain K12) GN=osmC PE=1 SV=2 - [OSMC_ECOLI]	2.68594	1.66821	0.924491	2.37758	1.39858	1.0401	0.395103	1.2008	1.00496	1.12015	0.801428
P0ADB1	osmE	Osmotically-inducible lipoprotein E OS=Escherichia coli (strain K12) GN=osmE PE=2 SV=1 - [OSME_ECOLI]	1.15282	0.80611	0.40547	0.858808	0.606734	0.561268	0.42663	0.807459	0.624052	0.769477	0.616434
P33362	osmF	Putative osmoprotectant uptake system substrate-binding protein OsmF OS=Escherichia coli (strain K12) GN=osmF PE=2 SV=1 - [OSMF_ECOLI]	1.27907	0.845947	0.3153	0.842751	0.625209	0.484993	0.233895	0.785328	0.80145	0.707443	0.794711
P0AFH8	osmY	Osmotically-inducible protein Y OS=Escherichia coli (strain K12) GN=osmY PE=1 SV=1 - [OSMY_ECOLI]	1.77994	0.879314	0.286333	0.858377	0.55589	0.458668	0.0730693	0.664607	0.528215	0.513163	0.575849
P31677	otsA	Alpha,alpha-trehalose-phosphate synthase [UDP-forming] OS=Escherichia coli (strain K12) GN=otsA PE=1 SV=3 - [OTSA_ECOLI]	1.63028	0.956076	0.353473	0.950007	0.871386	0.646217	0.308729	0.749163	0.485989	0.550789	0.540702
P31678	otsB	Trehalose-6-phosphate phosphatase OS=Escherichia coli (strain K12) GN=otsB PE=1 SV=2 - [OTSB_ECOLI]	1.582
P0ACQ4	oxyR	Hydrogen peroxide-inducible genes activator OS=Escherichia coli (strain K12) GN=oxyR PE=1 SV=1 - [OXYR_ECOLI]	1.52015	1.02255	0.596111	0.750438	0.319367	0.670931	0.345798	1.41591	1.08493	1.85189	0.798478
P76086	paaX	Transcriptional repressor PaaX OS=Escherichia coli (strain K12) GN=paaX PE=1 SV=1 - [PAAX_ECOLI]		1.11766	0.651036	0.969465	0.569473	0.882816
P77181	paaY	Phenylacetic acid degradation protein PaaY OS=Escherichia coli (strain K12) GN=paaY PE=3 SV=1 - [PAAY_ECOLI]	1.12617
P00903	pabA	Para-aminobenzoate synthase glutamine amidotransferase component II OS=Escherichia coli (strain K12) GN=pabA PE=1 SV=1 - [PABA_ECOLI]	1.09437	1.64463	0.21646	4.48259	10.7892	1.08337
P05041	pabB	Para-aminobenzoate synthase component 1 OS=Escherichia coli (strain K12) GN=pabB PE=1 SV=1 - [PABB_ECOLI]	0.947957	0.827334	0.629137	1.1764	0.822069	0.877558	0.470171	2.00911	1.94465	2.32407	0.811864
P28305	pabC	Aminodeoxychorismate lyase OS=Escherichia coli (strain K12) GN=pabC PE=1 SV=1 - [PABC_ECOLI]	1.48757	0.949579	0.669779	1.81154	0.977449	0.99669
P0A912	pal	Peptidoglycan-associated lipoprotein OS=Escherichia coli (strain K12) GN=pal PE=1 SV=1 - [PAL_ECOLI]	1.39261	1.17069	0.787935	1.24264	0.452085	0.693339	0.409558	1.35541	1.255	1.3016	0.974766
P31057	panB	3-methyl-2-oxobutanoate hydroxymethyltransferase OS=Escherichia coli (strain K12) GN=panB PE=1 SV=1 - [PANB_ECOLI]	0.511977	2.39151	1.09767	2.77159	1.24902	1.92458	0.233852	1.66813	1.37539	1.40688	0.756434
P31663	panC	Pantothenate synthetase OS=Escherichia coli (strain K12) GN=panC PE=1 SV=1 - [PANC_ECOLI]	1.8312	0.879756	0.561486	1.36336	1.0093	0.806846	0.370303	1.47566	1.36544	1.37351	0.75766
P0A790	panD	Aspartate 1-decarboxylase OS=Escherichia coli (strain K12) GN=panD PE=1 SV=1 - [PAND_ECOLI]	1.08675	0.702102	0.485038	0.950152	0.498915	0.805108	0.446043	1.86558	1.56786	1.89251	1.1517
P0A9J4	panE	2-dehydropantoate 2-reductase OS=Escherichia coli (strain K12) GN=panE PE=1 SV=1 - [PANE_ECOLI]	1.38047	0.843519	0.438921	1.05615	0.740303	0.649751
P20083	parE	DNA topoisomerase 4 subunit B OS=Escherichia coli (strain K12) GN=parE PE=1 SV=3 - [PARE_ECOLI]	0.87877	0.881683	0.480477	1.05362	0.631979	1.07241
P42588	patA	Putrescine aminotransferase OS=Escherichia coli (strain K12) GN=patA PE=1 SV=2 - [PAT_ECOLI]	0.76329	1.38299	0.243695	0.719379	0.55246	0.537333	2.09124	1.58319	1.19919	0.886579	1.29226
P0AFI5	pbpG	D-alanyl-D-alanine endopeptidase OS=Escherichia coli (strain K12) GN=pbpG PE=1 SV=2 - [PBP7_ECOLI]	2.174
P22259	pckA	Phosphoenolpyruvate carboxykinase [ATP] OS=Escherichia coli (strain K12) GN=pckA PE=1 SV=2 - [PCKA_ECOLI]	1.87754	0.983211	0.510371	1.48584	0.86707	0.769906	0.398755	1.48994	1.86352	1.38438	0.853477
P0A7A5	pcm	Protein-L-isoaspartate O-methyltransferase OS=Escherichia coli (strain K12) GN=pcm PE=1 SV=2 - [PIMT_ECOLI]	1.78181	1.57073	0.830209	2.35615	1.31452	0.88924
P0ABF1	pcnB	Poly(A) polymerase OS=Escherichia coli (strain K12) GN=pcnB PE=1 SV=2 - [PCNB_ECOLI]	0.550531	0.911023	0.469336	0.722272	0.299906	0.680529
P0ACL9	pdhR	Pyruvate dehydrogenase complex repressor OS=Escherichia coli (strain K12) GN=pdhR PE=1 SV=1 - [PDHR_ECOLI]	2.19618	0.72898	0.423725	1.25538	0.86432	0.766603	0.363169	1.24384	1.43978	1.18405	0.855494
P19624	pdxA	4-hydroxythreonine-4-phosphate dehydrogenase OS=Escherichia coli (strain K12) GN=pdxA PE=1 SV=1 - [PDXA_ECOLI]	1.50421	0.743559	0.440344	1.18807	0.698249	0.737531	0.459527	1.40224	1.56814	1.48317	0.805458
P05459	pdxB	Erythronate-4-phosphate dehydrogenase OS=Escherichia coli (strain K12) GN=pdxB PE=2 SV=2 - [PDXB_ECOLI]	1.1396	0.791296	0.486177	0.993449	0.626416	0.777997	0.318504	1.30012	1.23508	1.22936	0.803263
P0AFI7	pdxH	Pyridoxine/pyridoxamine 5'-phosphate oxidase OS=Escherichia coli (strain K12) GN=pdxH PE=1 SV=2 - [PDXH_ECOLI]	1.14828	0.755905	0.446794	1.12926	0.756183	0.728402	0.1851	1.44738	1.33107	1.56771	0.797964
P0A794	pdxJ	Pyridoxine 5'-phosphate synthase OS=Escherichia coli (strain K12) GN=pdxJ PE=1 SV=2 - [PDXJ_ECOLI]	0.618593	0.872913	0.56567	0.777656	0.392265	0.830149	0.514317	1.45113	1.11196	1.39838	1.02728
P40191	pdxK	Pyridoxine kinase OS=Escherichia coli (strain K12) GN=pdxK PE=1 SV=2 - [PDXK_ECOLI]	1.10972	0.933574	0.594366	1.13172	0.641147	0.803244	0.373316	1.48951	1.09714	1.59683	0.796996
P77150	pdxY	Pyridoxamine kinase OS=Escherichia coli (strain K12) GN=pdxY PE=1 SV=3 - [PDXY_ECOLI]	1.25252	0.828013	0.487113	1.69991	1.05207	0.759464
P68767	pepA	Cytosol aminopeptidase OS=Escherichia coli (strain K12) GN=pepA PE=1 SV=1 - [AMPA_ECOLI]		0.377113	0.32571	0.699166	0.499827	0.406611
P37095	pepB	Peptidase B OS=Escherichia coli (strain K12) GN=pepB PE=3 SV=2 - [PEPB_ECOLI]	0.582478	0.77309	0.481313	0.721603	0.375766	0.999114	0.392924	1.45171	1.35132	1.69407	0.968338
P15288	pepD	Cytosol non-specific dipeptidase OS=Escherichia coli (strain K12) GN=pepD PE=1 SV=3 - [PEPD_ECOLI]	1.35645	1.04118	0.693498	1.36364	0.766921	1.05385	0.512494	1.89569	1.76606	1.99123	0.978538
P0A7C6	pepE	Peptidase E OS=Escherichia coli (strain K12) GN=pepE PE=1 SV=1 - [PEPE_ECOLI]	1.37671	1.09906	0.702239	2.47916	1.05765	1.37479
P04825	pepN	Aminopeptidase N OS=Escherichia coli (strain K12) GN=pepN PE=1 SV=2 - [AMPN_ECOLI]	1.21254	0.937417	0.506845	1.01577	0.63917	0.847033	0.335644	1.25841	1.15927	1.2516	0.765343
P15034	pepP	Xaa-Pro aminopeptidase OS=Escherichia coli (strain K12) GN=pepP PE=1 SV=2 - [AMPP_ECOLI]	0.598538	0.854952	0.57742	0.690928	0.338329	0.824365	0.622078	1.57828	1.47161	1.72725	1.12738
P21165	pepQ	Xaa-Pro dipeptidase OS=Escherichia coli (strain K12) GN=pepQ PE=1 SV=2 - [PEPQ_ECOLI]	1.37463	1.10719	0.558068	1.49482	0.850032	0.907686	0.233359	1.44831	1.27206	1.33888	0.896133
P29745	pepT	Peptidase T OS=Escherichia coli (strain K12) GN=pepT PE=1 SV=2 - [PEPT_ECOLI]	1.38987	1.05337	0.574076	0.701017	0.238293	1.01416	0.367316	1.59778	1.01338	1.32257	0.768665
Q57083	perR	HTH-type transcriptional regulator PerR OS=Escherichia coli (strain K12) GN=perR PE=4 SV=1 - [PERR_ECOLI]		1.13079	0.709088	2.24576	0.898105	0.744765
P0A796	pfkA	6-phosphofructokinase isozyme 1 OS=Escherichia coli (strain K12) GN=pfkA PE=1 SV=1 - [K6PF1_ECOLI]	1.11911	0.820358	0.578257	0.967977	0.567599	1.05046	0.527196	1.38762	1.3993	1.30812	1.13176
P06999	pfkB	6-phosphofructokinase isozyme 2 OS=Escherichia coli (strain K12) GN=pfkB PE=1 SV=2 - [K6PF2_ECOLI]	3.49409	1.10886	0.425753	1.5306	1.20517	0.586417	0.270218	1.05465	0.817475	0.851606	0.399923
P0A9N4	pflA	Pyruvate formate-lyase 1-activating enzyme OS=Escherichia coli (strain K12) GN=pflA PE=1 SV=2 - [PFLA_ECOLI]	1.72946	1.0313	0.541682	1.69025	1.23794	0.935394	0.414896	2.39651	1.90592	2.40225	0.765271
P09373	pflB	Formate acetyltransferase 1 OS=Escherichia coli (strain K12) GN=pflB PE=1 SV=2 - [PFLB_ECOLI]	1.05144	0.83551	0.557722	0.952747	0.509175	1.37817	0.460903	1.80805	1.10911	1.69725	1.39315
P32674	pflD	Formate acetyltransferase 2 OS=Escherichia coli (strain K12) GN=pflD PE=3 SV=1 - [PFLD_ECOLI]	1.24463
P75906	pgaB	Poly-beta-1,6-N-acetyl-D-glucosamine N-deacetylase OS=Escherichia coli (strain K12) GN=pgaB PE=1 SV=1 - [PGAB_ECOLI]		1.40021	1.23122	1.54435	0.803344	0.923018
P0A6T1	pgi	Glucose-6-phosphate isomerase OS=Escherichia coli (strain K12) GN=pgi PE=1 SV=1 - [G6PI_ECOLI]	1.42459	1.14836	0.560132	1.69696	1.2285	0.780555	0.426254	1.53963	1.53045	1.35215	0.845934
P0A799	pgk	Phosphoglycerate kinase OS=Escherichia coli (strain K12) GN=pgk PE=1 SV=2 - [PGK_ECOLI]	2.24327	0.830241	0.431592	1.62623	0.982278	0.795486	0.348499	1.1465	1.21321	1.19115	0.834929
P52697	pgl	6-phosphogluconolactonase OS=Escherichia coli (strain K12) GN=pgl PE=1 SV=2 - [6PGL_ECOLI]	1.69322	0.701947	0.301596	0.801793	0.615397	0.653777	0.378275	1.09922	0.979043	1.13066	0.82995
P36938	pgm	Phosphoglucomutase OS=Escherichia coli (strain K12) GN=pgm PE=1 SV=1 - [PGM_ECOLI]	1.33344	0.917809	0.505271	1.05783	0.559397	0.77434	0.428728	1.31989	1.19238	1.25285	0.878569
P0AD42	pgpC	Uncharacterized protein YfhB OS=Escherichia coli (strain K12) GN=yfhB PE=4 SV=1 - [YFHB_ECOLI]	1.20588
P0ABF8	pgsA	CDP-diacylglycerol--glycerol-3-phosphate 3-phosphatidyltransferase OS=Escherichia coli (strain K12) GN=pgsA PE=1 SV=2 - [PGSA_ECOLI]							0.553028	1.27943	1.1574	1.17869	0.913773
P0A9J8	pheA	P-protein OS=Escherichia coli (strain K12) GN=pheA PE=1 SV=1 - [PHEA_ECOLI]	0.952654	0.793427	0.523133	0.72332	0.382515	1.02536	1.41186	3.95155	2.8564	3.32295	1.69572
P08312	pheS	Phenylalanine--tRNA ligase alpha subunit OS=Escherichia coli (strain K12) GN=pheS PE=1 SV=2 - [SYFA_ECOLI]	0.787128	0.69771	0.466298	0.530649	0.193176	0.848577	0.118309	1.52216	0.886205	1.39139	0.88586
P07395	pheT	Phenylalanine--tRNA ligase beta subunit OS=Escherichia coli (strain K12) GN=pheT PE=1 SV=2 - [SYFB_ECOLI]	0.895052	0.817417	0.470538	0.599401	0.237147	0.951511	0.561703	2.53658	1.39197	2.08471	0.957423
P0AFJ1	phnA	Protein PhnA OS=Escherichia coli (strain K12) GN=phnA PE=4 SV=1 - [PHNA_ECOLI]	2.77253	0.950293	0.581645	1.09592	0.559435	0.732474
P16681	phnB	Protein PhnB OS=Escherichia coli (strain K12) GN=phnB PE=4 SV=1 - [PHNB_ECOLI]	2.56185	1.09736	0.640735	1.13314	1.10494	0.862315
P00634	phoA	Alkaline phosphatase OS=Escherichia coli (strain K12) GN=phoA PE=1 SV=1 - [PPB_ECOLI]	0.85139	0.705747	0.329654	0.912807	0.525557	0.712436
P0AFJ5	phoB	Phosphate regulon transcriptional regulatory protein PhoB OS=Escherichia coli (strain K12) GN=phoB PE=1 SV=1 - [PHOB_ECOLI]	1.61595
P23836	phoP	Transcriptional regulatory protein PhoP OS=Escherichia coli (strain K12) GN=phoP PE=1 SV=1 - [PHOP_ECOLI]	1.18877	0.850021	0.485653	0.772458	0.406725	0.840355	0.433596	1.39023	1.20207	1.45145	1.1003
P0A9K7	phoU	Phosphate-specific transport system accessory protein PhoU OS=Escherichia coli (strain K12) GN=phoU PE=1 SV=1 - [PHOU_ECOLI]	1.12582	1.04702	0.565436	1.20387	0.652571	0.869335	0.587713	1.88241	1.65776	1.49042	0.773366
P00914	phrB	Deoxyribodipyrimidine photo-lyase OS=Escherichia coli (strain K12) GN=phrB PE=1 SV=1 - [PHR_ECOLI]	1.58691
P0AFJ7	pitA	Low-affinity inorganic phosphate transporter 1 OS=Escherichia coli (strain K12) GN=pitA PE=1 SV=1 - [PITA_ECOLI]	0.833081						0.251247	0.903151	0.904854	1.43455	0.842858
Q13835	PKP1	*CON* Plakophilin-1 OS=Homo sapiens GN=PKP1 PE=1 SV=2 - [PKP1_HUMAN]		1.22351	0.675615	1.58282	1.10651	0.675165
P0A921	pldA	Phospholipase A1 OS=Escherichia coli (strain K12) GN=pldA PE=1 SV=1 - [PA1_ECOLI]		1.08274	0.637969	1.37952	0.843529	0.844815	0.577871	1.52291	1.56158	1.38895	1.12718
P07000	pldB	Lysophospholipase L2 OS=Escherichia coli (strain K12) GN=pldB PE=4 SV=4 - [PLDB_ECOLI]	1.67859
P76002	pliG	Inhibitor of g-type lysozyme OS=Escherichia coli (strain K12) GN=pliG PE=1 SV=1 - [PLIG_ECOLI]		0.948973	0.984386	0.960445	0.451288	0.682334	0.355623	1.52401	0.58042	1.69408	1.30733
P0A7A7	plsB	Glycerol-3-phosphate acyltransferase OS=Escherichia coli (strain K12) GN=plsB PE=1 SV=2 - [PLSB_ECOLI]		0.824695	0.409257	0.819878	0.459418	0.71894
P27247	plsX	Phosphate acyltransferase OS=Escherichia coli (strain K12) GN=plsX PE=1 SV=2 - [PLSX_ECOLI]		0.831588	0.328483	0.748629	0.420102	0.591692
P0AFK0	pmbA	Protein PmbA OS=Escherichia coli (strain K12) GN=pmbA PE=1 SV=1 - [PMBA_ECOLI]	1.51355	0.748456	0.413447	0.977364	0.673284	0.718922	0.456488	1.68038	1.60758	1.52684	0.982227
P37590	pmrD	Signal transduction protein PmrD OS=Escherichia coli (strain K12) GN=pmrD PE=1 SV=2 - [PMRD_ECOLI]	1.42796	1.02943	0.70782	1.10356	0.512746	0.910076
P21369	pncA	Pyrazinamidase/nicotinamidase OS=Escherichia coli (strain K12) GN=pncA PE=3 SV=1 - [PNCA_ECOLI]	1.59134	2.20339	1.21098	2.89251	1.38631	1.772	0.838644	2.64997	2.16098	2.52504	0.755036
P18133	pncB	Nicotinate phosphoribosyltransferase OS=Escherichia coli (strain K12) GN=pncB PE=1 SV=3 - [PNCB_ECOLI]	1.18527	0.769524	0.463278	0.946997	0.751662	0.753817	0.519746	1.53994	1.96849	3.44048	0.886758
P0A6G3	pncC	Nicotinamide-nucleotide amidohydrolase PncC OS=Escherichia coli (strain K12) GN=pncC PE=1 SV=1 - [PNCC_ECOLI]	1.31114	0.728851	0.416042	1.15181	0.72596	0.686081	2.79945	11.5114	11.0338	12.3467	0.971921
P05055	pnp	Polyribonucleotide nucleotidyltransferase OS=Escherichia coli (strain K12) GN=pnp PE=1 SV=3 - [PNP_ECOLI]	0.802342	0.67972	0.564412	0.733799	0.348439	1.17961	0.447485	1.70015	1.41289	1.56301	0.901541
P07001	pntA	NAD(P) transhydrogenase subunit alpha OS=Escherichia coli (strain K12) GN=pntA PE=1 SV=2 - [PNTA_ECOLI]	0.704648	0.73709	0.481326	0.519981	0.216797	0.772667	0.421357	1.51364	1.1043	1.29905	0.889316
P0AB67	pntB	NAD(P) transhydrogenase subunit beta OS=Escherichia coli (strain K12) GN=pntB PE=1 SV=1 - [PNTB_ECOLI]	1.02217	0.708823	0.40743	0.624927	0.329553	0.76557	0.402921	1.51863	1.11135	1.25241	0.767787
P0AFK2	pnuC	Nicotinamide riboside transporter PnuC OS=Escherichia coli (strain K12) GN=pnuC PE=1 SV=1 - [PNUC_ECOLI]	0.525371
P00582	polA	DNA polymerase I OS=Escherichia coli (strain K12) GN=polA PE=1 SV=1 - [DPO1_ECOLI]	0.927767	0.868209	0.528449	0.842767	0.470167	0.847583	0.350368	1.35294	1.1898	1.40036	0.753484
P21189	polB	DNA polymerase II OS=Escherichia coli (strain K12) GN=polB PE=1 SV=2 - [DPO2_ECOLI]	2.65625	0.879717	0.449968	1.03161	0.695875	0.755107
P69874	potA	Spermidine/putrescine import ATP-binding protein PotA OS=Escherichia coli (strain K12) GN=potA PE=1 SV=1 - [POTA_ECOLI]	1.0336	0.736619	0.416909	0.986122	0.598483	0.755237	0.58467	1.51064	1.5461	1.48664	1.14664
P0AFK9	potD	Spermidine/putrescine-binding periplasmic protein OS=Escherichia coli (strain K12) GN=potD PE=1 SV=1 - [POTD_ECOLI]	1.49474	0.654246	0.375873	1.07756	0.690922	0.536783	0.296484	1.49889	1.33924	1.31791	0.890682
P0AAF1	potE	Putrescine-ornithine antiporter OS=Escherichia coli (strain K12) GN=potE PE=1 SV=1 - [POTE_ECOLI]							2.21775	13.2042	18.8763	2.58994	13.2609
P31133	potF	Putrescine-binding periplasmic protein OS=Escherichia coli (strain K12) GN=potF PE=1 SV=3 - [POTF_ECOLI]	0.995576	0.655407	0.40518	0.449626	0.300853	0.729999	0.645114	1.27692	1.46045	1.27817	1.41303
P07003	poxB	Pyruvate dehydrogenase [ubiquinone] OS=Escherichia coli (strain K12) GN=poxB PE=1 SV=1 - [POXB_ECOLI]	1.20122	0.777252	0.474677	0.573947	0.426978	0.555806	0.477598	1.2299	0.932015	1.22566	0.783248
P0A7A9	ppa	Inorganic pyrophosphatase OS=Escherichia coli (strain K12) GN=ppa PE=1 SV=2 - [IPYR_ECOLI]	1.11312	1.89022	0.880997	2.15438	0.691733	0.800208	0.523643	1.36136	1.38547	1.44285	0.983412
P00864	ppc	Phosphoenolpyruvate carboxylase OS=Escherichia coli (strain K12) GN=ppc PE=1 SV=1 - [CAPP_ECOLI]	1.22677	1.08975	0.433808	1.15053	0.595928	1.43139	0.387585	1.68641	1.28874	1.8233	1.19946
P0AFL3	ppiA	Peptidyl-prolyl cis-trans isomerase A OS=Escherichia coli (strain K12) GN=ppiA PE=1 SV=1 - [PPIA_ECOLI]	1.03053	1.03602	0.459887	1.39486	0.74333	0.657784	0.358689	1.86736	2.0037	1.93017	0.929398
P23869	ppiB	Peptidyl-prolyl cis-trans isomerase B OS=Escherichia coli (strain K12) GN=ppiB PE=1 SV=2 - [PPIB_ECOLI]	1.18818	0.864778	0.425676	1.13687	0.883649	0.752267	0.257122	1.35852	1.2034	1.4036	0.840834
P0A9L5	ppiC	Peptidyl-prolyl cis-trans isomerase C OS=Escherichia coli (strain K12) GN=ppiC PE=1 SV=2 - [PPIC_ECOLI]	2.11889	1.01878	0.52455	1.7646	1.13277	0.872341	1.02694	4.10332	4.16138	3.4745	0.671794
P0ADY1	ppiD	Peptidyl-prolyl cis-trans isomerase D OS=Escherichia coli (strain K12) GN=ppiD PE=1 SV=1 - [PPID_ECOLI]	0.590384	0.942412	0.456048	0.788936	0.318736	0.708586	0.348774	1.8128	1.34344	1.63327	0.954632
P0A7B3	ppnK	Probable inorganic polyphosphate/ATP-NAD kinase OS=Escherichia coli (strain K12) GN=ppnK PE=3 SV=1 - [PPNK_ECOLI]	1.28791
P23538	ppsA	Phosphoenolpyruvate synthase OS=Escherichia coli (strain K12) GN=ppsA PE=1 SV=5 - [PPSA_ECOLI]	0.819875	0.628092	0.445218	0.59811	0.293648	0.592889	0.491723	1.60351	1.56459	1.43225	0.945816
P0A8A4	ppsR	Phosphoenolpyruvate synthase regulatory protein OS=Escherichia coli (strain K12) GN=ppsR PE=1 SV=1 - [PSRP_ECOLI]	1.55917	0.646457	0.372963	0.756512	0.556776	0.612485	0.483989	1.39515	1.20691	1.46457	0.870663
P31992	pptA	Tautomerase PptA OS=Escherichia coli (strain K12) GN=pptA PE=1 SV=3 - [PPTA_ECOLI]	2.53418						0.43407	3.16216	0.791789	4.51257	0.959619
P0AFL6	ppx	Exopolyphosphatase OS=Escherichia coli (strain K12) GN=ppx PE=1 SV=2 - [PPX_ECOLI]		0.926386	0.460003	1.11226	0.684696	0.761213	0.288976	1.73048	1.39946	1.55343	0.945363
P31828	pqqL	Probable zinc protease PqqL OS=Escherichia coli (strain K12) GN=pqqL PE=3 SV=2 - [PQQL_ECOLI]	0.408453	0.397743	0.255185	0.31172	0.131589	0.443551	0.745501	0.848834	0.843635	0.763009	1.93302
P23865	prc	Tail-specific protease OS=Escherichia coli (strain K12) GN=prc PE=1 SV=2 - [PRC_ECOLI]	1.19073	0.719893	0.417737	1.11183	0.59933	0.798642	0.450547	1.75399	1.66203	1.81728	0.838712
P0A7I0	prfA	Peptide chain release factor 1 OS=Escherichia coli (strain K12) GN=prfA PE=1 SV=1 - [RF1_ECOLI]	1.25415	0.765173	0.447089	0.972287	0.65525	0.804736	0.416862	1.33673	1.16327	1.46434	0.880446
P07012	prfB	Peptide chain release factor 2 OS=Escherichia coli (strain K12) GN=prfB PE=1 SV=3 - [RF2_ECOLI]	1.20005	0.780337	0.503316	1.13893	0.618858	0.86093	0.442921	1.39939	1.41321	1.61891	1.02335
P0A7I4	prfC	Peptide chain release factor 3 OS=Escherichia coli (strain K12) GN=prfC PE=1 SV=2 - [RF3_ECOLI]	1.23474	0.869314	0.452227	1.213	0.853297	0.742982	0.586432	1.94853	2.07314	1.875	0.925844
P23862	priC	Primosomal replication protein N'' OS=Escherichia coli (strain K12) GN=priC PE=1 SV=3 - [PRIC_ECOLI]	1.31315	0.969377	0.633764	1.05232	0.551627	0.625113	0.542687	1.37353	1.40053	1.54002	0.854216
P0AEX5	prkB	Probable phosphoribulokinase OS=Escherichia coli (strain K12) GN=prkB PE=3 SV=1 - [KPPR_ECOLI]	1.21392	0.760064	0.447453	0.68689	0.304373	0.711736
P27298	prlC	Oligopeptidase A OS=Escherichia coli (strain K12) GN=prlC PE=3 SV=3 - [OPDA_ECOLI]	1.48899	0.991369	0.603089	1.09257	0.697245	0.728757	0.370467	1.49874	1.37673	1.40942	0.824092
P15373	prlF	Antitoxin PrlF OS=Escherichia coli (strain K12) GN=prlF PE=1 SV=1 - [PRLF_ECOLI]	1.29127
P0A8T1	prmA	Ribosomal protein L11 methyltransferase OS=Escherichia coli (strain K12) GN=prmA PE=1 SV=1 - [PRMA_ECOLI]	1.5528	1.41585	0.849704	2.06227	0.882096	0.756904
P39199	prmB	50S ribosomal protein L3 glutamine methyltransferase OS=Escherichia coli (strain K12) GN=prmB PE=1 SV=3 - [PRMB_ECOLI]		0.848906	0.535742	0.71147	0.240128	0.760821	0.395014	1.37416	1.04676	1.39598	0.902942
P0ACC1	prmC	Release factor glutamine methyltransferase OS=Escherichia coli (strain K12) GN=prmC PE=1 SV=1 - [PRMC_ECOLI]	1.47142
P07004	proA	Gamma-glutamyl phosphate reductase OS=Escherichia coli (strain K12) GN=proA PE=1 SV=2 - [PROA_ECOLI]	0.624447	0.790232	0.47028	0.660849	0.289198	0.813734	0.244864	1.22222	0.962395	1.39573	0.928932
P0A7B5	proB	Glutamate 5-kinase OS=Escherichia coli (strain K12) GN=proB PE=1 SV=1 - [PROB_ECOLI]	0.417061	0.779018	0.495082	0.718811	0.36328	0.798797	0.372954	2.34902	1.68064	2.34873	0.976318
P0A9L8	proC	Pyrroline-5-carboxylate reductase OS=Escherichia coli (strain K12) GN=proC PE=1 SV=1 - [P5CR_ECOLI]	1.08093	0.757769	0.42943	0.63082	0.19686	0.709718
P0C0L7	proP	Proline/betaine transporter OS=Escherichia coli (strain K12) GN=proP PE=1 SV=1 - [PROP_ECOLI]	0.782443						0.741223	1.70007	1.44577	2.01836	1.26765
P45577	proQ	ProP effector OS=Escherichia coli (strain K12) GN=proQ PE=1 SV=2 - [PROQ_ECOLI]	0.932343	0.916338	0.662062	1.0672	0.519828	0.865996	0.633201	2.36733	2.23693	3.18452	1.00592
P16659	proS	Proline--tRNA ligase OS=Escherichia coli (strain K12) GN=proS PE=1 SV=4 - [SYP_ECOLI]	0.915033	0.722254	0.480859	0.978993	0.669003	0.782791	0.499629	1.57923	1.27314	1.49523	1.08837
P14175	proV	Glycine betaine/L-proline transport ATP-binding protein ProV OS=Escherichia coli (strain K12) GN=proV PE=1 SV=1 - [PROV_ECOLI]	0.709828	0.283371	0.289718	0.474257	0.25872	0.527135
P0AFM2	proX	Glycine betaine-binding periplasmic protein OS=Escherichia coli (strain K12) GN=proX PE=1 SV=1 - [PROX_ECOLI]	0.941165	0.409129	0.225064	0.506022	0.222842	0.501348	0.113788	0.50398	0.494746	0.620822	0.661384
P77541	prpB	Methylisocitrate lyase OS=Escherichia coli (strain K12) GN=prpB PE=1 SV=3 - [PRPB_ECOLI]	0.729705
P0A717	prs	Ribose-phosphate pyrophosphokinase OS=Escherichia coli (strain K12) GN=prs PE=1 SV=2 - [KPRS_ECOLI]	1.22175	0.716423	0.500799	0.82896	0.312927	0.765979	0.297099	1.26163	1.13402	1.1355	0.822958
P0A8K1	psd	Phosphatidylserine decarboxylase proenzyme OS=Escherichia coli (strain K12) GN=psd PE=1 SV=1 - [PSD_ECOLI]	1.12139	2.07086	1.19521	2.68903	1.22564	1.90955	0.176955	1.13687	0.99764	1.07131	0.702315
P0AFM4	psiF	Phosphate starvation-inducible protein PsiF OS=Escherichia coli (strain K12) GN=psiF PE=1 SV=1 - [PSIF_ECOLI]	1.82281	1.37135	0.580029	1.27603	0.684609	0.800059
P0AFM6	pspA	Phage shock protein A OS=Escherichia coli (strain K12) GN=pspA PE=1 SV=2 - [PSPA_ECOLI]	1.26176	0.674762	0.467618	0.627315	0.160227	0.40594	0.273042	1.19542	0.861462	1.05466	0.491763
P0AFM9	pspB	Phage shock protein B OS=Escherichia coli (strain K12) GN=pspB PE=1 SV=1 - [PSPB_ECOLI]	1.38038
P0AFN2	pspC	Phage shock protein C OS=Escherichia coli (strain K12) GN=pspC PE=1 SV=1 - [PSPC_ECOLI]	1.0161	1.52994		1.8707	0.989099	0.665839
P23857	pspE	Thiosulfate sulfurtransferase PspE OS=Escherichia coli (strain K12) GN=pspE PE=1 SV=1 - [PSPE_ECOLI]	1.9873	1.74004	1.04734	2.73644	0.959868	1.29209	0.34834	4.64045	3.96239	5.41388	2.60066
P23830	pssA	CDP-diacylglycerol--serine O-phosphatidyltransferase OS=Escherichia coli (strain K12) GN=pssA PE=1 SV=2 - [PSS_ECOLI]		0.673388	0.383813	0.692508	0.281846	0.714098
P0AAH0	pstB	Phosphate import ATP-binding protein PstB OS=Escherichia coli (strain K12) GN=pstB PE=1 SV=2 - [PSTB_ECOLI]	1.41407	0.91475	0.416352	1.02528	0.890461	0.633083	0.589813	2.34211	2.09425	2.4231	0.886503
P0AG82	pstS	Phosphate-binding protein PstS OS=Escherichia coli (strain K12) GN=pstS PE=1 SV=1 - [PSTS_ECOLI]	1.13206	0.821643	0.464956	1.09234	0.661772	0.649189
P0A9M8	pta	Phosphate acetyltransferase OS=Escherichia coli (strain K12) GN=pta PE=1 SV=2 - [PTA_ECOLI]	1.37955	0.948797	0.483161	1.22458	0.481337	0.774776	0.368981	1.7106	1.24729	1.41991	0.802707
P0A7D1	pth	Peptidyl-tRNA hydrolase OS=Escherichia coli (strain K12) GN=pth PE=1 SV=1 - [PTH_ECOLI]	1.21958	0.66211	0.387401	1.12586	0.641706	0.615283	0.328225	1.33981	1.30393	1.27779	0.800665
P05458	ptrA	Protease 3 OS=Escherichia coli (strain K12) GN=ptrA PE=1 SV=1 - [PTRA_ECOLI]	1.33589	0.766096	0.440194	0.971041	0.703171	0.715682	2.0682	4.63214	1.67519	4.15432	1.45718
P24555	ptrB	Protease 2 OS=Escherichia coli (strain K12) GN=ptrB PE=1 SV=2 - [PTRB_ECOLI]	1.11347	0.797825	0.527968	1.03719	0.667643	0.948073
P32670	ptsA	Multiphosphoryl transfer protein 2 OS=Escherichia coli (strain K12) GN=ptsA PE=3 SV=2 - [PTFX2_ECOLI]	1.37032
P69786	ptsG	PTS system glucose-specific EIICB component OS=Escherichia coli (strain K12) GN=ptsG PE=1 SV=1 - [PTGCB_ECOLI]	0.519305	0.663348	0.471048	0.567771	0.339284	0.847218	0.801509	1.85376	1.49612	1.81796	0.942257
P0AA04	ptsH	Phosphocarrier protein HPr OS=Escherichia coli (strain K12) GN=ptsH PE=1 SV=1 - [PTHP_ECOLI]	1.84575	1.1159	0.781486	1.54119	0.566763	1.20711	0.381127	1.83862	2.03504	2.1847	1.60962
P08839	ptsI	Phosphoenolpyruvate-protein phosphotransferase OS=Escherichia coli (strain K12) GN=ptsI PE=1 SV=1 - [PT1_ECOLI]	1.25516	0.74172	0.463288	1.013	0.612317	0.847842	0.547375	1.43856	1.35592	1.60756	1.08735
P69829	ptsN	Nitrogen regulatory protein OS=Escherichia coli (strain K12) GN=ptsN PE=1 SV=1 - [PTSN_ECOLI]	1.16057	0.977701	0.628426	1.30951	0.721545	0.89668	0.476989	1.34139	1.17641	1.36391	1.01746
P37177	ptsP	Phosphoenolpyruvate-protein phosphotransferase PtsP OS=Escherichia coli (strain K12) GN=ptsP PE=3 SV=2 - [PT1P_ECOLI]			0.731993	1.59706	1.24599	0.687941
P0A7D4	purA	Adenylosuccinate synthetase OS=Escherichia coli (strain K12) GN=purA PE=1 SV=2 - [PURA_ECOLI]	2.39757	0.987025	0.460029	1.99678	1.343	0.804293	0.481424	1.49687	1.74542	1.25188	0.880677
P0AB89	purB	Adenylosuccinate lyase OS=Escherichia coli (strain K12) GN=purB PE=1 SV=1 - [PUR8_ECOLI]	0.692857	0.808563	0.5137	0.935307	0.481238	0.855482	0.365495	1.37878	1.29439	1.46157	0.933856
P0A7D7	purC	Phosphoribosylaminoimidazole-succinocarboxamide synthase OS=Escherichia coli (strain K12) GN=purC PE=1 SV=1 - [PUR7_ECOLI]	2.22673	1.18968	0.59802	2.43878	1.35455	0.738603	0.427009	1.44176	1.76015	1.34075	0.734014
P15640	purD	Phosphoribosylamine--glycine ligase OS=Escherichia coli (strain K12) GN=purD PE=1 SV=2 - [PUR2_ECOLI]	2.40673	1.11752	0.482939	2.60933	1.36516	0.722671	0.393939	1.29926	1.84758	1.23047	0.747032
P0AG18	purE	N5-carboxyaminoimidazole ribonucleotide mutase OS=Escherichia coli (strain K12) GN=purE PE=1 SV=2 - [PURE_ECOLI]	1.02123	1.0814	0.491512	1.27758	0.691969	0.829038
P0AG16	purF	Amidophosphoribosyltransferase OS=Escherichia coli (strain K12) GN=purF PE=1 SV=2 - [PUR1_ECOLI]	0.739217	0.998985	0.593159	1.10185	0.447689	0.869052	0.488411	1.42813	1.49727	1.47181	0.827251
P15639	purH	Bifunctional purine biosynthesis protein PurH OS=Escherichia coli (strain K12) GN=purH PE=1 SV=1 - [PUR9_ECOLI]	1.79084	1.1664	0.506497	2.63686	1.63361	0.753547	0.453684	1.43114	1.79165	1.57814	0.821309
P09029	purK	N5-carboxyaminoimidazole ribonucleotide synthase OS=Escherichia coli (strain K12) GN=purK PE=1 SV=2 - [PURK_ECOLI]	1.71514	1.0229	0.533773	1.64437	1.05879	0.703742	0.424079	1.42395	1.68765	1.20938	0.807217
P15254	purL	Phosphoribosylformylglycinamidine synthase OS=Escherichia coli (strain K12) GN=purL PE=1 SV=3 - [PUR4_ECOLI]	1.22061	0.903693	0.515752	1.46642	0.941781	0.768683	0.580685	1.61339	1.68615	1.49627	0.994379
P08178	purM	Phosphoribosylformylglycinamidine cyclo-ligase OS=Escherichia coli (strain K12) GN=purM PE=1 SV=3 - [PUR5_ECOLI]	2.36269	0.987577	0.49803	1.99247	1.17855	0.68968	0.41433	1.49061	1.67008	1.44822	0.778047
P08179	purN	Phosphoribosylglycinamide formyltransferase OS=Escherichia coli (strain K12) GN=purN PE=1 SV=1 - [PUR3_ECOLI]	1.42551	0.810914	0.416324	1.0207	0.825722	0.700216	0.447137	1.28154	1.35384	1.26249	0.863278
P31466	purP	Probable adenine permease PurP OS=Escherichia coli (strain K12) GN=purP PE=1 SV=2 - [PURP_ECOLI]	0.898984	0.203426	0.0388231	0.309364	0.879996	0.091384	0.57511	1.41066	1.41445	1.49111	0.87823
P0ACP7	purR	HTH-type transcriptional repressor PurR OS=Escherichia coli (strain K12) GN=purR PE=1 SV=2 - [PURR_ECOLI]	0.941527	0.706393	0.433473	0.679205	0.43225	0.699543	0.462046	1.41225	1.38491	1.55879	0.8196
P33221	purT	Phosphoribosylglycinamide formyltransferase 2 OS=Escherichia coli (strain K12) GN=purT PE=1 SV=3 - [PURT_ECOLI]	1.82479	0.918187	0.482181	1.93233	1.27435	0.655928	0.414357	1.44403	1.70074	0.94582	0.74289
P37051	purU	Formyltetrahydrofolate deformylase OS=Escherichia coli (strain K12) GN=purU PE=1 SV=1 - [PURU_ECOLI]	0.671109	0.919245	0.55502	0.621847	0.306033	0.775269	0.339514	1.51423	1.12831	1.48452	0.74721
P09546	putA	Bifunctional protein PutA OS=Escherichia coli (strain K12) GN=putA PE=1 SV=3 - [PUTA_ECOLI]	0.848313	0.712771	0.31931	0.567016	0.288493	0.625415	0.691633	1.66035	1.59508	1.90042	0.871481
P78061	puuA	Gamma-glutamylputrescine synthetase PuuA OS=Escherichia coli (strain K12) GN=puuA PE=1 SV=2 - [PUUA_ECOLI]	2.29805
P37906	puuB	Gamma-glutamylputrescine oxidoreductase OS=Escherichia coli (strain K12) GN=puuB PE=1 SV=2 - [PUUB_ECOLI]	1.12987
P76038	puuD	Gamma-glutamyl-gamma-aminobutyrate hydrolase PuuD OS=Escherichia coli (strain K12) GN=puuD PE=1 SV=2 - [PUUD_ECOLI]	1.40724	2.46882	0.369454	3.2936	1.08879	1.03775
P50457	puuE	4-aminobutyrate aminotransferase PuuE OS=Escherichia coli (strain K12) GN=puuE PE=1 SV=1 - [PUUE_ECOLI]	1.06156	1.33459	0.389642	1.10989	0.503407	0.96136
P0A9U6	puuR	HTH-type transcriptional regulator PuuR OS=Escherichia coli (strain K12) GN=puuR PE=1 SV=1 - [PUUR_ECOLI]	1.35831	0.726302	0.483308	0.724917	0.47885	0.705978
P21599	pykA	Pyruvate kinase II OS=Escherichia coli (strain K12) GN=pykA PE=1 SV=3 - [KPYK2_ECOLI]	0.613083	0.920222	0.524209	0.784693	0.394382	0.892189	0.46786	2.44367	1.42144	2.28775	0.875908
P0AD61	pykF	Pyruvate kinase I OS=Escherichia coli (strain K12) GN=pykF PE=1 SV=1 - [KPYK1_ECOLI]	1.06821	0.969214	0.518857	1.51795	0.762169	0.786355	0.476674	1.5957	1.51289	1.49451	1.02566
P0A786	pyrB	Aspartate carbamoyltransferase catalytic chain OS=Escherichia coli (strain K12) GN=pyrB PE=1 SV=2 - [PYRB_ECOLI]	0.179978	0.65819	0.50403	0.599387	0.292257	1.01529	0.472627	1.73947	2.16179	1.98695	1.0725
P05020	pyrC	Dihydroorotase OS=Escherichia coli (strain K12) GN=pyrC PE=1 SV=2 - [PYRC_ECOLI]	0.815866	0.737306	0.586139	0.855811	0.491552	0.867156	0.409703	1.38758	1.40986	1.71311	0.896454
P0A7E1	pyrD	Dihydroorotate dehydrogenase (quinone) OS=Escherichia coli (strain K12) GN=pyrD PE=1 SV=1 - [PYRD_ECOLI]	0.49417	0.706201	0.657786	0.659064	0.420939	0.894889	0.300626	2.09314	1.84767	2.02184	0.975476
P0A7E3	pyrE	Orotate phosphoribosyltransferase OS=Escherichia coli (strain K12) GN=pyrE PE=1 SV=2 - [PYRE_ECOLI]	0.881418	0.739097	0.384659	0.817273	0.52135	0.606147	0.225844	0.442124	0.297631	0.424633	0.424884
P08244	pyrF	Orotidine 5'-phosphate decarboxylase OS=Escherichia coli (strain K12) GN=pyrF PE=1 SV=1 - [PYRF_ECOLI]	0.811712	0.548915	0.374151	1.00028	0.542781	0.567611
P0A7E5	pyrG	CTP synthase OS=Escherichia coli (strain K12) GN=pyrG PE=1 SV=2 - [PYRG_ECOLI]	1.02064	0.739207	0.511149	1.0884	0.626412	0.845565	0.437933	1.49101	1.55336	1.19934	0.953678
P0A7E9	pyrH	Uridylate kinase OS=Escherichia coli (strain K12) GN=pyrH PE=1 SV=2 - [PYRH_ECOLI]	0.611911	0.691669	0.339842	0.62956	0.293057	0.519969	0.339037	1.16088	1.07349	1.20491	0.626673
P0A7F3	pyrI	Aspartate carbamoyltransferase regulatory chain OS=Escherichia coli (strain K12) GN=pyrI PE=1 SV=2 - [PYRI_ECOLI]	0.293635	0.544445	0.46011	0.448536	0.156714	0.821889	0.437023	2.14198	4.03085	2.95914	1.06444
P0AA53	qmcA	Protein QmcA OS=Escherichia coli (strain K12) GN=qmcA PE=1 SV=1 - [QMCA_ECOLI]	2.3637
P28304	qorA	Quinone oxidoreductase 1 OS=Escherichia coli (strain K12) GN=qorA PE=1 SV=1 - [QOR1_ECOLI]	2.27527	0.966253	0.272233	1.03136	1.11902	0.565986	0.329178	1.2091	0.911294	1.15508	0.74474
P39315	qorB	Quinone oxidoreductase 2 OS=Escherichia coli (strain K12) GN=qorB PE=1 SV=1 - [QOR2_ECOLI]	1.65214	0.71008	0.474276	0.881458	0.566359	0.700488	0.142605	0.996771	1.16964	1.36547	0.891448
P52076	qseB	Transcriptional regulatory protein QseB OS=Escherichia coli (strain K12) GN=qseB PE=2 SV=1 - [QSEB_ECOLI]	2.58453
P0A7F9	queA	S-adenosylmethionine:tRNA ribosyltransferase-isomerase OS=Escherichia coli (strain K12) GN=queA PE=1 SV=1 - [QUEA_ECOLI]	1.13211	0.95678	0.605963	1.40365	0.86472	0.808175
P77756	queC	7-cyano-7-deazaguanine synthase OS=Escherichia coli (strain K12) GN=queC PE=1 SV=1 - [QUEC_ECOLI]	1.75862	1.03648	0.437863	1.15143	0.891562	0.570393	0.732827	1.72712	1.82951	2.16154	0.744871
P64554	queE	7-carboxy-7-deazaguanine synthase OS=Escherichia coli (strain K12) GN=queE PE=1 SV=1 - [QUEE_ECOLI]	1.99878	0.830184	0.452654	1.2229	0.746512	0.76287	0.310751	1.03464	0.993306	1.04869	0.642184
Q46920	queF	NADPH-dependent 7-cyano-7-deazaguanine reductase OS=Escherichia coli (strain K12) GN=queF PE=1 SV=1 - [QUEF_ECOLI]	1.43924	0.918817	0.546734	1.39216	0.869842	0.816308	0.226658	1.61447	1.40893	1.59955	0.915298
P76062	racR	Rac prophage repressor OS=Escherichia coli (strain K12) GN=racR PE=4 SV=1 - [RACR_ECOLI]	1.3687	0.918599	0.676791	1.1066	0.546244	0.589147
P24554	radA	DNA repair protein RadA OS=Escherichia coli (strain K12) GN=radA PE=3 SV=1 - [RADA_ECOLI]		0.286877	0.212937	0.876242	0.599981	0.271622
P0AD49	raiA	Ribosome-associated inhibitor A OS=Escherichia coli (strain K12) GN=raiA PE=1 SV=2 - [RAIA_ECOLI]	4.92414	0.83923	0.558456	0.748822	0.478286	0.774269	0.36818	1.24057	1.41958	1.57021	1.03581
P60240	rapA	RNA polymerase-associated protein RapA OS=Escherichia coli (strain K12) GN=rapA PE=1 SV=2 - [RAPA_ECOLI]	1.11981	0.803449	0.432049	1.02508	0.537646	0.766645	0.341969	1.31239	0.838565	0.693911	0.720977
P0AAZ4	rarA	Replication-associated recombination protein A OS=Escherichia coli (strain K12) GN=rarA PE=1 SV=1 - [RARA_ECOLI]		0.883619	0.462924	0.889637	0.432449	0.742489
P0AGL5	ratA	Ribosome association toxin RatA OS=Escherichia coli (strain K12) GN=ratA PE=1 SV=1 - [RATA_ECOLI]	1.22079	2.05334	1.45406	3.32453	1.79906	2.59475
P52119	ratB	UPF0125 protein RatB OS=Escherichia coli (strain K12) GN=ratB PE=1 SV=1 - [RATB_ECOLI]	1.94925	1.02271	0.663163	1.25986	0.52109	0.809875
P31473	ravA	ATPase RavA OS=Escherichia coli (strain K12) GN=ravA PE=1 SV=2 - [RAVA_ECOLI]	0.905731	0.530615	0.304118	0.753762	0.952192	0.444897
P0A7G2	rbfA	Ribosome-binding factor A OS=Escherichia coli (strain K12) GN=rbfA PE=1 SV=2 - [RBFA_ECOLI]	0.919128	0.777912	0.467842	0.89671	0.545584	0.744274
P0A8V0	rbn	Ribonuclease BN OS=Escherichia coli (strain K12) GN=rbn PE=1 SV=1 - [RBN_ECOLI]	1.36266	0.850582	0.445581	1.11207	0.637863	0.731978	0.437058	1.57583	1.53864	1.53164	0.870105
P04983	rbsA	Ribose import ATP-binding protein RbsA OS=Escherichia coli (strain K12) GN=rbsA PE=1 SV=1 - [RBSA_ECOLI]		0.711053	0.400179	1.05487	1.21592	0.739431
P02925	rbsB	D-ribose-binding periplasmic protein OS=Escherichia coli (strain K12) GN=rbsB PE=1 SV=1 - [RBSB_ECOLI]	1.46538	0.823871	0.436848	1.42232	0.856813	0.990052	0.116421	0.927217	0.85503	0.929316	1.40731
P04982	rbsD	D-ribose pyranase OS=Escherichia coli (strain K12) GN=rbsD PE=1 SV=3 - [RBSD_ECOLI]	0.894993	1.11629	0.657	1.75577	1.00428	1.45541
P0A9J6	rbsK	Ribokinase OS=Escherichia coli (strain K12) GN=rbsK PE=1 SV=1 - [RBSK_ECOLI]	1.5834	0.806136	0.403336	1.39211	0.730607	0.805334
P64534	rcnB	Nickel/cobalt homeostasis protein RcnB OS=Escherichia coli (strain K12) GN=rcnB PE=1 SV=1 - [RCNB_ECOLI]	2.86957	1.17671	0.583938	1.15129	0.569635	0.66266	0.197684	1.20988	1.0619	1.1873	0.70648
P64530	rcnR	Transcriptional repressor RcnR OS=Escherichia coli (strain K12) GN=rcnR PE=1 SV=1 - [RCNR_ECOLI]	1.1576	0.771814	0.634328	1.0655	0.341519	0.776972
P69407	rcsB	Capsular synthesis regulator component B OS=Escherichia coli (strain K12) GN=rcsB PE=1 SV=1 - [RCSB_ECOLI]	1.49105	0.820423	0.479081	1.30989	0.981779	0.89785
P39838	rcsD	Sensor-like histidine kinase RcsD OS=Escherichia coli (strain K12) GN=rcsD PE=1 SV=3 - [RCSD_ECOLI]		1.29409	0.469602	1.02435	0.570466	0.695617
P69411	rcsF	Protein RcsF OS=Escherichia coli (strain K12) GN=rcsF PE=1 SV=1 - [RCSF_ECOLI]	1.14367	0.750788	0.425448	0.983005	0.737885	0.659253
P52061	rdgB	dITP/XTP pyrophosphatase OS=Escherichia coli (strain K12) GN=rdgB PE=1 SV=1 - [RDGB_ECOLI]	1.0025	0.794648	0.576243	1.12781	0.471781	0.88003	0.443293	1.4883	1.43551	1.57536	1.11882
P36767	rdgC	Recombination-associated protein RdgC OS=Escherichia coli (strain K12) GN=rdgC PE=1 SV=1 - [RDGC_ECOLI]	1.13415	0.82849	0.519091	1.08072	0.580836	0.76905	0.411645	1.59209	1.4568	1.63623	0.892003
P0C0K3	rdoA	Protein RdoA OS=Escherichia coli (strain K12) GN=rdoA PE=1 SV=1 - [RDOA_ECOLI]	1.99701	0.969723	0.388767	1.34366	1.01641	0.667228	0.410781	1.15255	1.28232	1.21902	0.74582
P0A7G6	recA	Protein RecA OS=Escherichia coli (strain K12) GN=recA PE=1 SV=2 - [RECA_ECOLI]	1.87472	1.025	0.532021	1.65464	1.20905	0.733393	0.310444	1.38895	1.37358	1.18099	0.807479
P0A7H0	recF	DNA replication and repair protein RecF OS=Escherichia coli (strain K12) GN=recF PE=1 SV=2 - [RECF_ECOLI]	1.2072
P24230	recG	ATP-dependent DNA helicase RecG OS=Escherichia coli (strain K12) GN=recG PE=1 SV=1 - [RECG_ECOLI]	0.909393	0.840306	0.455961	1.12525	0.721705	0.733782
P21893	recJ	Single-stranded-DNA-specific exonuclease RecJ OS=Escherichia coli (strain K12) GN=recJ PE=1 SV=2 - [RECJ_ECOLI]	1.5316	1.16364	0.699963	2.54747	1.45077	1.56053
P15043	recQ	ATP-dependent DNA helicase RecQ OS=Escherichia coli (strain K12) GN=recQ PE=1 SV=5 - [RECQ_ECOLI]	0.887954
P0A7H6	recR	Recombination protein RecR OS=Escherichia coli (strain K12) GN=recR PE=3 SV=1 - [RECR_ECOLI]	0.991102	0.53156	0.331482	0.853954	0.575752	0.562851
P33596	recX	Regulatory protein RecX OS=Escherichia coli (strain K12) GN=recX PE=2 SV=2 - [RECX_ECOLI]	3.2458
P0AG20	relA	GTP pyrophosphokinase OS=Escherichia coli (strain K12) GN=relA PE=1 SV=1 - [RELA_ECOLI]	2.57261	1.13522	0.594482	1.83999	0.947431	1.04239
P0C079	relB	Antitoxin RelB OS=Escherichia coli (strain K12) GN=relB PE=1 SV=1 - [RELB_ECOLI]	1.23806						1.20478	2.37015	2.36649	2.87016	1.36395
P0C077	relE	mRNA interferase RelE OS=Escherichia coli (strain K12) GN=relE PE=1 SV=1 - [RELE_ECOLI]	1.31541	1.23124	0.688011	1.40802	0.825184	0.730325	0.417601	1.27928	1.15766	1.30051	0.788906
P09980	rep	ATP-dependent DNA helicase rep OS=Escherichia coli (strain K12) GN=rep PE=1 SV=3 - [REP_ECOLI]		2.68593	1.62994	3.43414	2.82802	2.05969	0.377547	1.48547	1.18819	1.256	0.59668
P27127	rfaB	Lipopolysaccharide 1,6-galactosyltransferase OS=Escherichia coli (strain K12) GN=rfaB PE=3 SV=2 - [RFAB_ECOLI]	2.11635	1.14184		1.44264	0.668379	0.598498	0.500139	1.42882	1.29293	1.2565	0.711793
P24173	rfaC	Lipopolysaccharide heptosyltransferase 1 OS=Escherichia coli (strain K12) GN=rfaC PE=1 SV=1 - [RFAC_ECOLI]	0.874724	0.894688	0.486119	1.28117	0.820378	0.816226	0.470443	1.43221	1.19875	1.12601	0.844748
P37692	rfaF	ADP-heptose--LPS heptosyltransferase 2 OS=Escherichia coli (strain K12) GN=rfaF PE=1 SV=1 - [RFAF_ECOLI]	1.44175	0.584115	0.398236	0.84353	0.634861	0.561135
P25740	rfaG	Lipopolysaccharide core biosynthesis protein RfaG OS=Escherichia coli (strain K12) GN=rfaG PE=1 SV=1 - [RFAG_ECOLI]	1.55532	0.876482	0.467232	1.3344	0.887288	0.684499	0.312942	1.20485	1.06445	1.02179	0.661885
P27128	rfaI	Lipopolysaccharide 1,3-galactosyltransferase OS=Escherichia coli (strain K12) GN=rfaI PE=3 SV=1 - [RFAI_ECOLI]	1.6436	1.11026	0.456748	1.48349	1.07932	0.589737
P27129	rfaJ	Lipopolysaccharide 1,2-glucosyltransferase OS=Escherichia coli (strain K12) GN=rfaJ PE=1 SV=2 - [RFAJ_ECOLI]	2.65527	1.25439	0.656883	1.38899	0.702367	0.910537	0.400044	1.66777	1.21354	1.89934	0.881389
P27243	rfaL	O-antigen ligase OS=Escherichia coli (strain K12) GN=rfaL PE=1 SV=2 - [RFAL_ECOLI]		0.886278	0.406507	0.849893	0.632111	0.612324
P25741	rfaP	Lipopolysaccharide core heptose(I) kinase RfaP OS=Escherichia coli (strain K12) GN=rfaP PE=3 SV=1 - [RFAP_ECOLI]							0.534696	2.34293	1.84817	1.98269	0.891087
P25742	rfaQ	Lipopolysaccharide core heptosyltransferase RfaQ OS=Escherichia coli (strain K12) GN=rfaQ PE=1 SV=2 - [RFAQ_ECOLI]		0.771796	0.380707	1.12009	0.604768	0.621408
P27240	rfaY	Lipopolysaccharide core heptose(II) kinase RfaY OS=Escherichia coli (strain K12) GN=rfaY PE=3 SV=2 - [RFAY_ECOLI]							0.37493	1.84971	1.32828	1.30223	0.78194
P27241	rfaZ	Lipopolysaccharide core biosynthesis protein RfaZ OS=Escherichia coli (strain K12) GN=rfaZ PE=4 SV=2 - [RFAZ_ECOLI]		0.826931	0.391221	0.851643	0.355185	0.66152
P37759	rfbB	dTDP-glucose 4,6-dehydratase 1 OS=Escherichia coli (strain K12) GN=rfbB PE=3 SV=2 - [RMLB1_ECOLI]	0.934054	0.599635	0.326436	0.782789	0.525728	0.581023	0.604841	1.57538	1.63207	1.8239	1.12021
P37745	rfbC	dTDP-4-dehydrorhamnose 3,5-epimerase OS=Escherichia coli (strain K12) GN=rfbC PE=1 SV=1 - [RMLC_ECOLI]	1.18845	0.708336	0.57923	0.995744	0.526681	0.872393	0.524472	1.68974	1.7565	1.68162	1.27216
P37760	rfbD	dTDP-4-dehydrorhamnose reductase OS=Escherichia coli (strain K12) GN=rfbD PE=3 SV=2 - [RMLD_ECOLI]	1.0147	0.799311	0.51018	0.997449	0.610226	0.784807	0.376122	1.19635	1.00895	1.24229	0.923147
P27833	rffA	Lipopolysaccharide biosynthesis protein RffA OS=Escherichia coli (strain K12) GN=rffA PE=3 SV=2 - [RFFA_ECOLI]	1.87397	1.40953	1.03141	2.21511	1.7137	1.41877
P27830	rffG	dTDP-glucose 4,6-dehydratase 2 OS=Escherichia coli (strain K12) GN=rffG PE=1 SV=3 - [RMLB2_ECOLI]	1.02237	0.791021	0.49751	1.02483	0.699095	0.772621	0.284577	1.13628	1.3357	1.41106	0.95786
P32170	rhaA	L-rhamnose isomerase OS=Escherichia coli (strain K12) GN=rhaA PE=1 SV=2 - [RHAA_ECOLI]	1.16817
P0A8J8	rhlB	ATP-dependent RNA helicase RhlB OS=Escherichia coli (strain K12) GN=rhlB PE=1 SV=2 - [RHLB_ECOLI]	2.925	0.743909	0.370216	1.39784	1.25671	0.721291	0.30863	1.28929	1.06131	0.99805	0.604283
P0AG30	rho	Transcription termination factor Rho OS=Escherichia coli (strain K12) GN=rho PE=1 SV=1 - [RHO_ECOLI]	1.29356	0.768259	0.386337	0.882719	0.460571	0.638511	0.534536	1.54584	1.34885	1.61095	1.14998
P16919	rhsD	Protein RhsD OS=Escherichia coli (strain K12) GN=rhsD PE=2 SV=3 - [RHSD_ECOLI]		1.94285		4.3547		1.49998
P0A7I7	ribA	GTP cyclohydrolase-2 OS=Escherichia coli (strain K12) GN=ribA PE=1 SV=1 - [RIBA_ECOLI]	1.30124	0.754452	0.667116	1.31729	0.751282	0.849038	1.72944	9.39077	8.22717	10.6272	0.876554
P0A7J0	ribB	3,4-dihydroxy-2-butanone 4-phosphate synthase OS=Escherichia coli (strain K12) GN=ribB PE=1 SV=1 - [RIBB_ECOLI]	2.30043	1.0112	0.540342	1.72224	1.13791	0.939323
P0AFU8	ribC	Riboflavin synthase OS=Escherichia coli (strain K12) GN=ribC PE=1 SV=1 - [RISA_ECOLI]	1.13895	0.865242	0.506051	1.01103	0.560673	0.751044	0.33302	1.35391	0.967672	1.35499	0.824834
P25539	ribD	Riboflavin biosynthesis protein RibD OS=Escherichia coli (strain K12) GN=ribD PE=1 SV=1 - [RIBD_ECOLI]	1.64899	0.888395	0.476288	1.35741	0.944936	0.725344
P61714	ribE	6,7-dimethyl-8-ribityllumazine synthase OS=Escherichia coli (strain K12) GN=ribE PE=1 SV=1 - [RISB_ECOLI]	2.22907	1.74546	0.596269	1.35571	1.40091	0.830599	0.429886	1.37988	0.985133	1.20791	1.08063
P0AG40	ribF	Riboflavin biosynthesis protein RibF OS=Escherichia coli (strain K12) GN=ribF PE=1 SV=1 - [RIBF_ECOLI]	1.24443	0.709138	0.40657	1.06863	0.660673	0.809338	0.381162	1.32918	1.33617	1.26248	0.8874
P0AF93	ridA	Enamine/imine deaminase OS=Escherichia coli (strain K12) GN=ridA PE=1 SV=2 - [RIDA_ECOLI]	0.716733	0.986851	0.710901	0.925516	0.330117	0.695252	0.32903	1.38821	1.09487	1.35705	0.874703
P41409	rihA	Pyrimidine-specific ribonucleoside hydrolase RihA OS=Escherichia coli (strain K12) GN=rihA PE=1 SV=2 - [RIHA_ECOLI]	0.738622	1.16844	0.65578	1.51856	0.482457	1.03787
P22564	rihC	Non-specific ribonucleoside hydrolase RihC OS=Escherichia coli (strain K12) GN=rihC PE=1 SV=1 - [RIHC_ECOLI]	1.03404	1.36716	0.64815	1.90025	0.8116	0.949751
P0A944	rimI	Ribosomal-protein-alanine acetyltransferase OS=Escherichia coli (strain K12) GN=rimI PE=3 SV=1 - [RIMI_ECOLI]	1.7113	0.812444	0.372944	1.08829	0.491769	0.725548
P0A948	rimJ	Ribosomal-protein-alanine acetyltransferase OS=Escherichia coli (strain K12) GN=rimJ PE=3 SV=1 - [RIMJ_ECOLI]	1.1491	0.867519	0.480292	1.0917	0.758934	0.779841
P0C0U4	rimK	Ribosomal protein S6 modification protein OS=Escherichia coli (strain K12) GN=rimK PE=3 SV=1 - [RIMK_ECOLI]	1.38804	4.82766	6.06979	6.20548	3.30477	4.66465	0.404773	2.12427	1.56671	1.78367	0.813277
P13857	rimL	Ribosomal-protein-serine acetyltransferase OS=Escherichia coli (strain K12) GN=rimL PE=1 SV=1 - [RIML_ECOLI]	1.4529	1.11042	0.612896	1.79266	1.38557	1.07984	0.387235	1.00023	1.06532	0.97624	0.811343
P0A7X6	rimM	Ribosome maturation factor RimM OS=Escherichia coli (strain K12) GN=rimM PE=1 SV=1 - [RIMM_ECOLI]	0.939824	0.696053	0.610317	0.749158	0.3611	0.945784	0.595614	1.99724	2.24912	1.84565	1.17589
P0AEI4	rimO	Ribosomal protein S12 methylthiotransferase RimO OS=Escherichia coli (strain K12) GN=rimO PE=1 SV=1 - [RIMO_ECOLI]	0.873491	0.795675	0.552283	1.01858	0.581308	0.808539	0.444809	1.73505	1.52706	1.27623	1.06573
P0A8A8	rimP	Ribosome maturation factor RimP OS=Escherichia coli (strain K12) GN=rimP PE=1 SV=2 - [RIMP_ECOLI]	0.882895	0.958002	0.529642	1.19914	0.488319	0.790914
P36999	rlmA	23S rRNA (guanine(745)-N(1))-methyltransferase OS=Escherichia coli (strain K12) GN=rlmA PE=1 SV=1 - [RLMA_ECOLI]	1.5538	0.761234	0.436078	1.3615	1.21963	0.768429	0.558102	1.94982	2.19494	1.83901	1.33798
P63177	rlmB	23S rRNA (guanosine-2'-O-)-methyltransferase RlmB OS=Escherichia coli (strain K12) GN=rlmB PE=1 SV=1 - [RLMB_ECOLI]	2.51654	0.820081	0.516495	1.00744	0.450653	1.22584	0.388582	1.3817	1.59219	1.23534	1.00777
P55135	rlmD	23S rRNA (uracil(1939)-C(5))-methyltransferase RlmD OS=Escherichia coli (strain K12) GN=rlmD PE=1 SV=3 - [RLMD_ECOLI]	1.49809	0.631887	0.419832	1.03947	0.620614	0.760949	0.364662	1.18823	1.26504	1.11431	0.745427
P75782	rlmF	Ribosomal RNA large subunit methyltransferase F OS=Escherichia coli (strain K12) GN=rlmF PE=1 SV=2 - [RLMF_ECOLI]	1.06075	0.688769	0.472312	0.637719	0.320053	0.933662
P42596	rlmG	Ribosomal RNA large subunit methyltransferase G OS=Escherichia coli (strain K12) GN=rlmG PE=1 SV=2 - [RLMG_ECOLI]	1.36433	0.83577	0.454054	1.08374	0.677362	0.783516
P0A8I8	rlmH	Ribosomal RNA large subunit methyltransferase H OS=Escherichia coli (strain K12) GN=rlmH PE=1 SV=1 - [RLMH_ECOLI]	1.20153	0.872481	0.673034	1.08786	0.767714	1.01394
P75876	rlmI	Ribosomal RNA large subunit methyltransferase I OS=Escherichia coli (strain K12) GN=rlmI PE=1 SV=2 - [RLMI_ECOLI]	0.585211	0.945299	0.613918	0.891939	0.385461	0.803884	0.539476	1.8761	1.50907	1.49844	0.662781
P37634	rlmJ	Ribosomal RNA large subunit methyltransferase J OS=Escherichia coli (strain K12) GN=rlmJ PE=1 SV=1 - [RLMJ_ECOLI]	1.32743
P75864	rlmL	Ribosomal RNA large subunit methyltransferase K/L OS=Escherichia coli (strain K12) GN=rlmL PE=1 SV=1 - [RLMKL_ECOLI]		0.670142	0.351586	0.675908	0.45072	0.820616
P0ADR6	rlmM	Ribosomal RNA large subunit methyltransferase M OS=Escherichia coli (strain K12) GN=rlmM PE=1 SV=1 - [RLMM_ECOLI]	1.09777	0.860276	0.345122	1.00058	0.597692	0.754519	0.656157	2.3178	2.11779	2.2446	1.06941
P36979	rlmN	Dual-specificity RNA methyltransferase RlmN OS=Escherichia coli (strain K12) GN=rlmN PE=1 SV=1 - [RLMN_ECOLI]	1.09973	0.739769	0.51876	1.24006	0.962929	0.73228
P10100	rlpA	Rare lipoprotein A OS=Escherichia coli (strain K12) GN=rlpA PE=1 SV=1 - [RLPA_ECOLI]	1.1373	0.905443	0.565666	1.16534	0.680882	0.785822	0.301063	1.28075	1.07255	1.06497	0.877357
P0AA37	rluA	Ribosomal large subunit pseudouridine synthase A OS=Escherichia coli (strain K12) GN=rluA PE=1 SV=2 - [RLUA_ECOLI]	1.25334	0.821881	0.490763	1.0867	0.799613	0.646135	0.45805	1.27542	1.12947	1.16156	0.90288
P37765	rluB	Ribosomal large subunit pseudouridine synthase B OS=Escherichia coli (strain K12) GN=rluB PE=1 SV=2 - [RLUB_ECOLI]	1.16611
P33643	rluD	Ribosomal large subunit pseudouridine synthase D OS=Escherichia coli (strain K12) GN=rluD PE=1 SV=4 - [RLUD_ECOLI]	1.0373	0.821736	0.500175	1.31802	0.868611	0.789401
P75966	rluE	Ribosomal large subunit pseudouridine synthase E OS=Escherichia coli (strain K12) GN=rluE PE=1 SV=2 - [RLUE_ECOLI]	1.02367
P37744	rmlA1	Glucose-1-phosphate thymidylyltransferase 1 OS=Escherichia coli (strain K12) GN=rmlA1 PE=1 SV=2 - [RMLA1_ECOLI]	0.990162	0.686983	0.478068	0.937896	0.556866	0.787186	1.01977	3.45479	3.47218	3.29211	0.950248
P61887	rmlA2	Glucose-1-phosphate thymidylyltransferase 2 OS=Escherichia coli (strain K12) GN=rmlA2 PE=1 SV=1 - [RMLA2_ECOLI]	1.61347	0.638138	0.248416	0.881757	0.946764	0.476026	2.27992	5.01058	5.92956	5.69528	0.727548
P0AG71	rmuC	DNA recombination protein RmuC OS=Escherichia coli (strain K12) GN=rmuC PE=1 SV=1 - [RMUC_ECOLI]	2.30005
P21338	rna	Ribonuclease I OS=Escherichia coli (strain K12) GN=rna PE=1 SV=1 - [RNI_ECOLI]		0.691425	0.498319	0.743465	0.383134	1.05778
P30850	rnb	Exoribonuclease 2 OS=Escherichia coli (strain K12) GN=rnb PE=1 SV=3 - [RNB_ECOLI]	0.699626	0.814823	0.600603	0.817191	0.486038	0.87208	0.493888	1.55194	1.43772	1.52944	1.03
P0A7Y0	rnc	Ribonuclease 3 OS=Escherichia coli (strain K12) GN=rnc PE=1 SV=1 - [RNC_ECOLI]	0.906376	0.793098	0.540993	1.0012	0.551887	0.711012
P09155	rnd	Ribonuclease D OS=Escherichia coli (strain K12) GN=rnd PE=1 SV=1 - [RND_ECOLI]	1.04777	0.771277	0.554617	1.1505	0.747491	0.998921
P21513	rne	Ribonuclease E OS=Escherichia coli (strain K12) GN=rne PE=1 SV=6 - [RNE_ECOLI]	0.78494	0.681115	0.53095	0.6482	0.285199	1.10147
P77179	rnfE	Electron transport complex protein RnfE OS=Escherichia coli (strain K12) GN=rnfE PE=1 SV=1 - [RNFE_ECOLI]								0.812358	0.96384	1.17966	0.609303
P0A7Y4	rnhA	Ribonuclease HI OS=Escherichia coli (strain K12) GN=rnhA PE=1 SV=1 - [RNH_ECOLI]	0.912649	0.801489	0.508628	1.26291	0.754312	0.702989
P10442	rnhB	Ribonuclease HII OS=Escherichia coli (strain K12) GN=rnhB PE=1 SV=2 - [RNH2_ECOLI]	1.54652
P0AFW4	rnk	Regulator of nucleoside diphosphate kinase OS=Escherichia coli (strain K12) GN=rnk PE=1 SV=1 - [RNK_ECOLI]	1.40741	1.64079	0.721952	2.06019	0.99415	0.78856
P52129	rnlA	mRNA endoribonuclease LS OS=Escherichia coli (strain K12) GN=rnlA PE=1 SV=2 - [RNLA_ECOLI]	0.928974
P0A7Y8	rnpA	Ribonuclease P protein component OS=Escherichia coli (strain K12) GN=rnpA PE=1 SV=1 - [RNPA_ECOLI]		0.989814	0.71996	0.935486	0.376525	1.38858
P21499	rnr	Ribonuclease R OS=Escherichia coli (strain K12) GN=rnr PE=1 SV=2 - [RNR_ECOLI]		0.904523	0.44999	0.741265	0.36661	0.805248
P30014	rnt	Ribonuclease T OS=Escherichia coli (strain K12) GN=rnt PE=1 SV=1 - [RNT_ECOLI]	1.09987						0.493179	1.39866	1.44706	1.77547	1.14595
P0ACI0	rob	Right origin-binding protein OS=Escherichia coli (strain K12) GN=rob PE=1 SV=1 - [ROB_ECOLI]	1.78709	0.790698	0.421337	1.08222	0.704364	0.660781	0.293826	1.04046	0.898468	0.897757	0.61946
P27434	rodZ	Cytoskeleton protein RodZ OS=Escherichia coli (strain K12) GN=rodZ PE=1 SV=2 - [RODZ_ECOLI]	1.38591	0.585812	0.30271	0.737957	0.557094	0.649359	0.354365	1.18181	0.882866	1.25876	0.69361
P0AFW8	rof	Protein rof OS=Escherichia coli (strain K12) GN=rof PE=1 SV=1 - [ROF_ECOLI]	1.4054	1.08517	0.65649	1.06337	0.531728	0.731262	0.184606	1.46313	1.16095	1.31847	1.0548
P0AG07	rpe	Ribulose-phosphate 3-epimerase OS=Escherichia coli (strain K12) GN=rpe PE=1 SV=1 - [RPE_ECOLI]	1.08331	0.965689	0.444769	0.998106	0.496664	0.756091	0.433793	1.46417	1.15494	1.47627	0.874683
P0CG19	rph	Inactive ribonuclease PH OS=Escherichia coli (strain K12) GN=rph PE=3 SV=1 - [RNPH_ECOLI]	1.18251	0.771736	0.988378	1.23421	0.511129	0.685845	0.25371	6.30167	10.2129	5.76654	1.18472
P0A7Z0	rpiA	Ribose-5-phosphate isomerase A OS=Escherichia coli (strain K12) GN=rpiA PE=1 SV=1 - [RPIA_ECOLI]	2.08353	0.972389	0.571033	1.40695	0.778961	0.723486	0.431325	1.5549	1.3532	1.46838	0.823122
P37351	rpiB	Ribose-5-phosphate isomerase B OS=Escherichia coli (strain K12) GN=rpiB PE=1 SV=2 - [RPIB_ECOLI]	1.35685	1.79342	0.685527	3.66418	2.94332	1.59117	0.309607	1.73014	1.31929	1.42137	0.705769
P0ACS7	rpiR	HTH-type transcriptional regulator RpiR OS=Escherichia coli (strain K12) GN=rpiR PE=1 SV=1 - [RPIR_ECOLI]		0.925419	0.311335	1.5566	1.54366	0.656022
P0A7L0	rplA	50S ribosomal protein L1 OS=Escherichia coli (strain K12) GN=rplA PE=1 SV=2 - [RL1_ECOLI]	1.05403	0.922981	0.551542	0.930039	0.481579	0.639467	0.40913	2.38262	1.69224	1.94855	0.550891
P60422	rplB	50S ribosomal protein L2 OS=Escherichia coli (strain K12) GN=rplB PE=1 SV=2 - [RL2_ECOLI]	1.108	0.823279	0.544394	0.678111	0.374134	1.08657	0.424262	1.4894	1.09761	1.16457	0.804199
P60438	rplC	50S ribosomal protein L3 OS=Escherichia coli (strain K12) GN=rplC PE=1 SV=1 - [RL3_ECOLI]	1.40374	0.724714	0.471307	0.692095	0.232807	0.931042	0.376174	1.68195	1.25627	1.38266	0.885936
P60723	rplD	50S ribosomal protein L4 OS=Escherichia coli (strain K12) GN=rplD PE=1 SV=1 - [RL4_ECOLI]	1.4066	0.913166	0.745844	0.735576	0.279712	1.44549
P62399	rplE	50S ribosomal protein L5 OS=Escherichia coli (strain K12) GN=rplE PE=1 SV=2 - [RL5_ECOLI]	1.16903	0.811472	0.483458	0.701392	0.445264	0.637451	0.43852	1.64619	1.27845	1.39316	0.699152
P0AG55	rplF	50S ribosomal protein L6 OS=Escherichia coli (strain K12) GN=rplF PE=1 SV=2 - [RL6_ECOLI]	1.07831	0.928334	0.528054	0.926651	0.562315	0.581627	0.290933	1.32554	1.08707	0.998354	0.608068
P0A7R1	rplI	50S ribosomal protein L9 OS=Escherichia coli (strain K12) GN=rplI PE=1 SV=1 - [RL9_ECOLI]	1.07097	0.917275	0.540897	1.00808	0.517216	0.648759	0.323241	1.50743	1.20667	1.228	0.692042
P0A7J3	rplJ	50S ribosomal protein L10 OS=Escherichia coli (strain K12) GN=rplJ PE=1 SV=2 - [RL10_ECOLI]	0.947224	1.15525	0.682429	1.26069	0.684152	0.744879	1.09378	4.50995	2.86498	3.49799	0.641103
P0A7J7	rplK	50S ribosomal protein L11 OS=Escherichia coli (strain K12) GN=rplK PE=1 SV=2 - [RL11_ECOLI]	0.977039	0.954899	0.677767	1.33978	0.716713	0.7422	0.189648	1.3614	0.894211	1.23897	0.89955
P0A7K2	rplL	50S ribosomal protein L7/L12 OS=Escherichia coli (strain K12) GN=rplL PE=1 SV=2 - [RL7_ECOLI]	0.94301	1.73984	1.30902	1.00259	0.294586	0.703625	0.583005	1.6971	1.02558	1.37245	1.07707
P0AA10	rplM	50S ribosomal protein L13 OS=Escherichia coli (strain K12) GN=rplM PE=1 SV=1 - [RL13_ECOLI]	1.4479	0.568229	0.485777	0.643675	0.339884	1.35258
P0ADY3	rplN	50S ribosomal protein L14 OS=Escherichia coli (strain K12) GN=rplN PE=1 SV=1 - [RL14_ECOLI]	1.40352	0.86695	0.609675	1.0427	0.698001	0.822205
P02413	rplO	50S ribosomal protein L15 OS=Escherichia coli (strain K12) GN=rplO PE=1 SV=1 - [RL15_ECOLI]	0.989843	0.884335	0.660764	0.886931	0.433972	1.34253	0.499091	2.06277	1.45148	1.54965	0.82699
P0ADY7	rplP	50S ribosomal protein L16 OS=Escherichia coli (strain K12) GN=rplP PE=1 SV=1 - [RL16_ECOLI]	1.75108	0.366625	0.199076	0.626814	0.497696	0.908965
P0AG44	rplQ	50S ribosomal protein L17 OS=Escherichia coli (strain K12) GN=rplQ PE=1 SV=1 - [RL17_ECOLI]	0.942132	0.882831	0.742572	0.975403	0.47665	1.55116	0.395688	2.94701	2.01202	2.70678	0.842983
P0C018	rplR	50S ribosomal protein L18 OS=Escherichia coli (strain K12) GN=rplR PE=1 SV=1 - [RL18_ECOLI]	1.05348	1.11125	0.773276	0.950453	0.363024	0.971149	0.267161	2.3721	1.41323	1.90743	0.928667
P0A7K6	rplS	50S ribosomal protein L19 OS=Escherichia coli (strain K12) GN=rplS PE=1 SV=2 - [RL19_ECOLI]	0.747323	0.717612	0.42048	0.747122	0.366613	0.725349	0.434244	1.57547	1.28879	1.61335	0.767118
P0A7L3	rplT	50S ribosomal protein L20 OS=Escherichia coli (strain K12) GN=rplT PE=1 SV=2 - [RL20_ECOLI]	0.875567	1.38155	1.05145	1.03546	0.315558	1.44369	0.205197	2.59885	1.50142	1.97133	0.814254
P0AG48	rplU	50S ribosomal protein L21 OS=Escherichia coli (strain K12) GN=rplU PE=1 SV=1 - [RL21_ECOLI]	0.824882	0.889778	0.6192	0.736262	0.259278	0.812912
P61175	rplV	50S ribosomal protein L22 OS=Escherichia coli (strain K12) GN=rplV PE=1 SV=1 - [RL22_ECOLI]	1.27779	0.761565	0.865355	0.822963	0.2513	0.523938	0.140272	1.3838	0.714924	0.853502	0.784026
P0ADZ0	rplW	50S ribosomal protein L23 OS=Escherichia coli (strain K12) GN=rplW PE=1 SV=1 - [RL23_ECOLI]	1.19867	1.35342	1.15821	0.878833	0.442481	0.797723		1.37606	1.1624	1.84611	1.14738
P60624	rplX	50S ribosomal protein L24 OS=Escherichia coli (strain K12) GN=rplX PE=1 SV=2 - [RL24_ECOLI]	2.62327	1.03288	0.912396	1.00237	0.375703	0.943603
P68919	rplY	50S ribosomal protein L25 OS=Escherichia coli (strain K12) GN=rplY PE=1 SV=1 - [RL25_ECOLI]	1.85565	0.977725	0.79212	1.07286	0.536067	0.999944	0.371381	1.82369	1.38041	1.64422	1.23709
P0A7M2	rpmB	50S ribosomal protein L28 OS=Escherichia coli (strain K12) GN=rpmB PE=1 SV=2 - [RL28_ECOLI]	1.22205	1.20476	1.53167	1.55812	1.41734	3.11923	0.377851	2.37486	1.54121	2.14616	0.935841
P0A7M6	rpmC	50S ribosomal protein L29 OS=Escherichia coli (strain K12) GN=rpmC PE=1 SV=1 - [RL29_ECOLI]	2.56071	1.20889	0.801069	1.18935	0.768334	1.17421
P0AG51	rpmD	50S ribosomal protein L30 OS=Escherichia coli (strain K12) GN=rpmD PE=1 SV=2 - [RL30_ECOLI]	1.89087	0.703034	0.518135	1.40717	1.19827	0.93514
P0A7M9	rpmE	50S ribosomal protein L31 OS=Escherichia coli (strain K12) GN=rpmE PE=1 SV=1 - [RL31_ECOLI]	1.63407	1.87828	1.18452	1.4653	0.557273	1.49082	0.664952	8.13841	5.19255	7.94806	1.46272
P0A7N9	rpmG	50S ribosomal protein L33 OS=Escherichia coli (strain K12) GN=rpmG PE=1 SV=2 - [RL33_ECOLI]	1.21162
P0A7Q1	rpmI	50S ribosomal protein L35 OS=Escherichia coli (strain K12) GN=rpmI PE=1 SV=2 - [RL35_ECOLI]	1.35703
P0A7Q6	rpmJ	50S ribosomal protein L36 OS=Escherichia coli (strain K12) GN=rpmJ PE=1 SV=1 - [RL36_ECOLI]	2.13473	10.6581	8.30092	11.4661	3.74824	6.28395
P0A7Z4	rpoA	DNA-directed RNA polymerase subunit alpha OS=Escherichia coli (strain K12) GN=rpoA PE=1 SV=1 - [RPOA_ECOLI]	0.9483	0.924852	0.685866	0.731641	0.300254	1.01619	0.399721	1.67634	1.26666	2.46087	0.904243
P0A8V2	rpoB	DNA-directed RNA polymerase subunit beta OS=Escherichia coli (strain K12) GN=rpoB PE=1 SV=1 - [RPOB_ECOLI]	0.934731	0.798085	0.525478	0.673822	0.301896	1.09223	0.416521	1.81821	1.28562	1.77209	0.868384
P0A8T7	rpoC	DNA-directed RNA polymerase subunit beta' OS=Escherichia coli (strain K12) GN=rpoC PE=1 SV=1 - [RPOC_ECOLI]	0.881533	0.867128	0.557036	0.934309	0.445004	1.09544	0.380425	2.05839	1.45884	1.68461	0.789423
P00579	rpoD	RNA polymerase sigma factor RpoD OS=Escherichia coli (strain K12) GN=rpoD PE=1 SV=2 - [RPOD_ECOLI]	1.07706	0.868629	0.5878	0.94759	0.43015	0.710869	0.441154	1.85091	1.5056	1.90167	0.772637
P0AGB6	rpoE	RNA polymerase sigma-E factor OS=Escherichia coli (strain K12) GN=rpoE PE=1 SV=1 - [RPOE_ECOLI]	1.2213	0.96492	0.697811	0.960954	0.467829	0.820946
P24255	rpoN	RNA polymerase sigma-54 factor OS=Escherichia coli (strain K12) GN=rpoN PE=3 SV=2 - [RP54_ECOLI]	1.40123	1.05033	0.49101	1.17334	0.595212	0.774289	0.455279	1.2763	1.11431	1.40024	0.895605
P13445	rpoS	RNA polymerase sigma factor RpoS OS=Escherichia coli (strain K12) GN=rpoS PE=3 SV=3 - [RPOS_ECOLI]	1.01764	0.747697	0.233584	0.441711	0.246283	0.499025
P0A800	rpoZ	DNA-directed RNA polymerase subunit omega OS=Escherichia coli (strain K12) GN=rpoZ PE=1 SV=1 - [RPOZ_ECOLI]	1.03101						0.208115	2.38927	1.57745	1.64748	1.4486
P0AG67	rpsA	30S ribosomal protein S1 OS=Escherichia coli (strain K12) GN=rpsA PE=1 SV=1 - [RS1_ECOLI]	0.608418	0.692663	0.413639	0.585418	0.243594	0.697902	0.445016	1.51158	1.13234	1.52619	0.773807
P0A7V0	rpsB	30S ribosomal protein S2 OS=Escherichia coli (strain K12) GN=rpsB PE=1 SV=2 - [RS2_ECOLI]	1.11351	0.803807	0.499332	1.04991	0.723022	0.827476	0.432586	1.44716	1.53342	1.58833	1.19431
P0A7V3	rpsC	30S ribosomal protein S3 OS=Escherichia coli (strain K12) GN=rpsC PE=1 SV=2 - [RS3_ECOLI]	1.0603	0.72757	0.474828	0.798734	0.42151	0.867165	0.446239	1.98332	1.6866	1.55313	1.06316
P0A7V8	rpsD	30S ribosomal protein S4 OS=Escherichia coli (strain K12) GN=rpsD PE=1 SV=2 - [RS4_ECOLI]	0.9116	0.766991	0.604495	0.698382	0.234722	1.16511	0.359243	1.6355	1.38442	1.47068	0.958635
P0A7W1	rpsE	30S ribosomal protein S5 OS=Escherichia coli (strain K12) GN=rpsE PE=1 SV=2 - [RS5_ECOLI]	1.42622	0.732435	0.440678	0.904849	0.513772	0.814536	0.340956	1.37381	1.2531	1.32929	0.862809
P02358	rpsF	30S ribosomal protein S6 OS=Escherichia coli (strain K12) GN=rpsF PE=1 SV=1 - [RS6_ECOLI]	1.56946	0.803525	0.61152	0.922312	0.369328	0.932841
P02359	rpsG	30S ribosomal protein S7 OS=Escherichia coli (strain K12) GN=rpsG PE=1 SV=3 - [RS7_ECOLI]	0.876526	0.728835	0.593093	0.566166	0.222495	0.742005	0.382966	1.55854	1.31757	1.47372	0.973145
P0A7W7	rpsH	30S ribosomal protein S8 OS=Escherichia coli (strain K12) GN=rpsH PE=1 SV=2 - [RS8_ECOLI]	1.21997	0.869584	0.550855	0.771344	0.394493	0.788097	0.325929	1.9169	1.49498	1.62798	0.845648
P0A7X3	rpsI	30S ribosomal protein S9 OS=Escherichia coli (strain K12) GN=rpsI PE=1 SV=2 - [RS9_ECOLI]	0.806033	0.718218	0.533487	0.540627	0.206118	1.08325	0.518802	2.13719	1.44923	2.24106	0.708507
P0A7R5	rpsJ	30S ribosomal protein S10 OS=Escherichia coli (strain K12) GN=rpsJ PE=1 SV=1 - [RS10_ECOLI]	1.17038	0.70873	0.472044	0.722974	0.343784	0.804277	0.451462	1.60717	1.15458	1.26753	0.759615
P0A7R9	rpsK	30S ribosomal protein S11 OS=Escherichia coli (strain K12) GN=rpsK PE=1 SV=2 - [RS11_ECOLI]	1.39255	1.67695	1.12125	1.29794	0.688403	1.00297
P0A7S3	rpsL	30S ribosomal protein S12 OS=Escherichia coli (strain K12) GN=rpsL PE=1 SV=2 - [RS12_ECOLI]	0.793589	3.45749	3.50763	3.49734	1.22314	8.04375
P0A7S9	rpsM	30S ribosomal protein S13 OS=Escherichia coli (strain K12) GN=rpsM PE=1 SV=2 - [RS13_ECOLI]	0.810312	0.755445	0.535733	0.632922	0.183618	0.955065	0.391855	1.77665	1.15891	1.51187	0.797728
P0AG59	rpsN	30S ribosomal protein S14 OS=Escherichia coli (strain K12) GN=rpsN PE=1 SV=2 - [RS14_ECOLI]	1.70448	1.98799	1.48907	1.23152	0.328074	2.14799
P0ADZ4	rpsO	30S ribosomal protein S15 OS=Escherichia coli (strain K12) GN=rpsO PE=1 SV=2 - [RS15_ECOLI]	1.09989	0.880673	0.579836	0.752795	0.32572	0.927996
P0A7T3	rpsP	30S ribosomal protein S16 OS=Escherichia coli (strain K12) GN=rpsP PE=1 SV=1 - [RS16_ECOLI]	1.10834	2.60943	1.61271	2.83741	1.5607	1.66867
P0AG63	rpsQ	30S ribosomal protein S17 OS=Escherichia coli (strain K12) GN=rpsQ PE=1 SV=2 - [RS17_ECOLI]	1.92072	0.98814	0.82559	0.511231	0.234386	0.719182
P0A7T7	rpsR	30S ribosomal protein S18 OS=Escherichia coli (strain K12) GN=rpsR PE=1 SV=2 - [RS18_ECOLI]	1.67844	1.18729	0.987773	1.0931	0.424162	1.22546
P0A7U3	rpsS	30S ribosomal protein S19 OS=Escherichia coli (strain K12) GN=rpsS PE=1 SV=2 - [RS19_ECOLI]		0.848162	0.488256	0.458967	0.144087	1.04145	0.67337	6.22772	3.15806	6.14868	0.889
P0A7U7	rpsT	30S ribosomal protein S20 OS=Escherichia coli (strain K12) GN=rpsT PE=1 SV=2 - [RS20_ECOLI]	1.42964
P68679	rpsU	30S ribosomal protein S21 OS=Escherichia coli (strain K12) GN=rpsU PE=1 SV=2 - [RS21_ECOLI]	0.912261	0.89645	1.12993	0.8603	0.309197	0.756953
P0A8R0	rraA	Regulator of ribonuclease activity A OS=Escherichia coli (strain K12) GN=rraA PE=1 SV=1 - [RRAA_ECOLI]	0.768256	1.13268	0.530203	1.16572	0.412252	0.874307	0.553478	2.23355	1.53617	1.94149	0.951121
P0AF90	rraB	Regulator of ribonuclease activity B OS=Escherichia coli (strain K12) GN=rraB PE=1 SV=1 - [RRAB_ECOLI]	1.54985	1.1757	0.747893	1.60715	0.454739	0.891535
P0AFX4	rsd	Regulator of sigma D OS=Escherichia coli (strain K12) GN=rsd PE=1 SV=1 - [RSD_ECOLI]	1.96849						0.35175	0.845558	0.823977	0.777143	0.588985
P0AFX7	rseA	Sigma-E factor negative regulatory protein OS=Escherichia coli (strain K12) GN=rseA PE=1 SV=1 - [RSEA_ECOLI]	1.08252
P0AFX9	rseB	Sigma-E factor regulatory protein RseB OS=Escherichia coli (strain K12) GN=rseB PE=1 SV=1 - [RSEB_ECOLI]	1.4248	0.788699	0.390567	1.07203	0.791465	0.620967	0.628115	2.59824	2.33884	2.93707	0.782039
P0AEH1	rseP	Regulator of sigma E protease OS=Escherichia coli (strain K12) GN=rseP PE=1 SV=1 - [RSEP_ECOLI]	1.07594	1.19175	0.547082	1.22725	0.70214	0.772859	0.415487	1.05851	1.18085	1.0663	0.784869
P0AAT6	rsfS	Ribosomal silencing factor RsfS OS=Escherichia coli (strain K12) GN=rsfS PE=1 SV=1 - [IOJAP_ECOLI]	1.05742	0.84002	0.602622	1.15683	0.725027	1.02631	0.771161	4.9043	2.79161	4.4495	1.20048
P39286	rsgA	Putative ribosome biogenesis GTPase RsgA OS=Escherichia coli (strain K12) GN=rsgA PE=1 SV=2 - [RSGA_ECOLI]	1.36106	0.739215	0.324222	0.969499	0.738198	0.417251	0.36565	1.19908	1.07223	1.05856	0.635523
P06992	rsmA	Ribosomal RNA small subunit methyltransferase A OS=Escherichia coli (strain K12) GN=rsmA PE=1 SV=1 - [RSMA_ECOLI]	1.54889	0.989062	0.505298	1.30394	0.807154	0.655055
P36929	rsmB	Ribosomal RNA small subunit methyltransferase B OS=Escherichia coli (strain K12) GN=rsmB PE=1 SV=2 - [RSMB_ECOLI]	1.71315	1.64113	0.656053	2.31817	1.03078	0.865675
P39406	rsmC	Ribosomal RNA small subunit methyltransferase C OS=Escherichia coli (strain K12) GN=rsmC PE=1 SV=3 - [RSMC_ECOLI]	1.76913	0.698852	0.422221	0.932799	0.579145	0.751527
P0ADX9	rsmD	Ribosomal RNA small subunit methyltransferase D OS=Escherichia coli (strain K12) GN=rsmD PE=1 SV=1 - [RSMD_ECOLI]	1.69034	0.661223	0.345665	0.986694	0.896869	0.727084
P0AGL7	rsmE	Ribosomal RNA small subunit methyltransferase E OS=Escherichia coli (strain K12) GN=rsmE PE=1 SV=1 - [RSME_ECOLI]	1.34173	0.857814	0.5227	1.27078	0.774303	0.811982	0.445625	1.40633	1.29262	1.39991	0.757551
P76273	rsmF	Ribosomal RNA small subunit methyltransferase F OS=Escherichia coli (strain K12) GN=rsmF PE=1 SV=2 - [RSMF_ECOLI]	1.21893	0.793265	0.453869	0.969463	0.570454	0.711583
P0A6U5	rsmG	Ribosomal RNA small subunit methyltransferase G OS=Escherichia coli (strain K12) GN=rsmG PE=1 SV=1 - [RSMG_ECOLI]	1.37354	1.20018	0.833598	1.89821	0.804372	1.05565
P60390	rsmH	Ribosomal RNA small subunit methyltransferase H OS=Escherichia coli (strain K12) GN=rsmH PE=1 SV=1 - [RSMH_ECOLI]	1.4384	0.881056	0.543547	1.01949	0.690469	0.884029	0.416588	1.32408	1.24197	1.27135	0.934825
P67087	rsmI	Ribosomal RNA small subunit methyltransferase I OS=Escherichia coli (strain K12) GN=rsmI PE=1 SV=1 - [RSMI_ECOLI]	1.42741	0.940436	0.539111	1.28754	0.870564	0.889467
P68567	rsmJ	Ribosomal RNA small subunit methyltransferase J OS=Escherichia coli (strain K12) GN=rsmJ PE=1 SV=1 - [RSMJ_ECOLI]	2.07071	0.775268	0.310586	1.08515	0.925335	0.64046	0.296472	1.87665	1.72768	2.45971	1.11576
P38105	rspB	Starvation-sensing protein RspB OS=Escherichia coli (strain K12) GN=rspB PE=3 SV=1 - [RSPB_ECOLI]	2.35411	0.670756	0.334975	0.938808	0.896493	0.715474
P0AFR0	rssA	NTE family protein RssA OS=Escherichia coli (strain K12) GN=rssA PE=1 SV=2 - [RSSA_ECOLI]	0.148902
P0AEV1	rssB	Protein hnr OS=Escherichia coli (strain K12) GN=hnr PE=1 SV=1 - [HNR_ECOLI]	1.46162	1.62829	0.638562	2.35755	1.80485	0.94026	0.357475	1.0509	0.914102	1.10025	0.775691
P52108	rstA	Transcriptional regulatory protein RstA OS=Escherichia coli (strain K12) GN=rstA PE=1 SV=2 - [RSTA_ECOLI]	1.51672	0.81372	0.501091	1.0318	0.669271	0.73693	0.415706	1.36423	1.31018	1.4839	1.24292
P0AA43	rsuA	Ribosomal small subunit pseudouridine synthase A OS=Escherichia coli (strain K12) GN=rsuA PE=1 SV=1 - [RSUA_ECOLI]	1.13835	0.939462	0.636756	1.18344	0.688039	1.21161	0.368572	1.24567	1.09854	1.16844	0.818112
P77611	rsxC	Electron transport complex protein RnfC OS=Escherichia coli (strain K12) GN=rnfC PE=3 SV=1 - [RNFC_ECOLI]	1.2055
P77285	rsxG	Electron transport complex protein RnfG OS=Escherichia coli (strain K12) GN=rnfG PE=3 SV=1 - [RNFG_ECOLI]	1.12069	0.872156	0.554308	1.10289	0.650295	0.864001	0.343414	1.3715	1.22768	1.41229	0.90496
P0ACU2	rutR	HTH-type transcriptional regulator RutR OS=Escherichia coli (strain K12) GN=rutR PE=1 SV=1 - [RUTR_ECOLI]	1.32122
P0A809	ruvA	Holliday junction ATP-dependent DNA helicase RuvA OS=Escherichia coli (strain K12) GN=ruvA PE=1 SV=1 - [RUVA_ECOLI]	1.1737	0.742761	0.483078	0.701401	0.343316	0.777365
P0A812	ruvB	Holliday junction ATP-dependent DNA helicase RuvB OS=Escherichia coli (strain K12) GN=ruvB PE=1 SV=1 - [RUVB_ECOLI]	1.6242	0.655784	0.340136	0.852527	0.618616	0.571747	0.700919	2.41104	1.61639	2.1729	1.34604
P76149	sad	Succinate semialdehyde dehydrogenase [NAD(P)+] Sad OS=Escherichia coli (strain K12) GN=sad PE=1 SV=2 - [SAD_ECOLI]	1.78366	1.15062	0.543593	1.18457	0.721032	0.819015
P0AFY2	sanA	Protein SanA OS=Escherichia coli (strain K12) GN=sanA PE=4 SV=1 - [SANA_ECOLI]		0.669376	0.181226	0.765628	1.01636	0.409359
Q47622	sapA	Peptide transport periplasmic protein SapA OS=Escherichia coli (strain K12) GN=sapA PE=3 SV=1 - [SAPA_ECOLI]	1.01679	0.764285	0.418622	0.930928	0.711343	0.728709	0.352009	1.11427	1.08764	1.08844	0.87026
P0AAH8	sapF	Peptide transport system ATP-binding protein SapF OS=Escherichia coli (strain K12) GN=sapF PE=3 SV=1 - [SAPF_ECOLI]	2.02438
P04995	sbcB	Exodeoxyribonuclease I OS=Escherichia coli (strain K12) GN=sbcB PE=1 SV=2 - [EX1_ECOLI]	1.15391	0.881955	0.5406	1.19823	1.09259	0.964364
P0AG76	sbcD	Nuclease SbcCD subunit D OS=Escherichia coli (strain K12) GN=sbcD PE=1 SV=1 - [SBCD_ECOLI]	1.70585
P33012	sbmC	DNA gyrase inhibitor OS=Escherichia coli (strain K12) GN=sbmC PE=1 SV=1 - [SBMC_ECOLI]		1.57041	0.648604	1.17536	0.501588	0.844156
P0AG78	sbp	Sulfate-binding protein OS=Escherichia coli (strain K12) GN=sbp PE=1 SV=1 - [SUBI_ECOLI]	0.685304	0.691506	0.472406	0.857477	0.667489	0.751127	0.300499	2.3625	1.2417	1.75195	0.87425
P52043	scpC	Propionyl-CoA:succinate CoA transferase OS=Escherichia coli (strain K12) GN=scpC PE=1 SV=1 - [SCPC_ECOLI]	1.5008
P16095	sdaA	L-serine dehydratase 1 OS=Escherichia coli (strain K12) GN=sdaA PE=1 SV=3 - [SDHL_ECOLI]	1.70582	0.721827	0.362398	0.914933	0.608359	0.445847	0.431659	2.82716	2.36081	3.61988	0.843628
P30744	sdaB	L-serine dehydratase 2 OS=Escherichia coli (strain K12) GN=sdaB PE=1 SV=2 - [SDHM_ECOLI]	0.855336	0.5932	0.364122	1.18361	1.14718	0.713868
P0AAD6	sdaC	Serine transporter OS=Escherichia coli (strain K12) GN=sdaC PE=1 SV=1 - [SDAC_ECOLI]	1.00449	0.522846	0.361616	0.941496	0.824448	0.496379	0.234105	1.57708	1.57428	1.61029	0.988782
P0AC41	sdhA	Succinate dehydrogenase flavoprotein subunit OS=Escherichia coli (strain K12) GN=sdhA PE=1 SV=1 - [DHSA_ECOLI]	1.61462	0.875842	0.364516	1.13562	0.721611	0.72278	0.288203	0.667935	0.936739	0.668398	0.5611
P07014	sdhB	Succinate dehydrogenase iron-sulfur subunit OS=Escherichia coli (strain K12) GN=sdhB PE=1 SV=1 - [DHSB_ECOLI]	1.57034	0.986186	0.355961	1.11021	0.663756	0.695134	0.447967	0.707921	1.07614	0.732472	0.522046
P69054	sdhC	Succinate dehydrogenase cytochrome b556 subunit OS=Escherichia coli (strain K12) GN=sdhC PE=1 SV=1 - [DHSC_ECOLI]		0.411703	0.200698	0.543881	0.38399	0.437454
P0AC44	sdhD	Succinate dehydrogenase hydrophobic membrane anchor subunit OS=Escherichia coli (strain K12) GN=sdhD PE=1 SV=1 - [DHSD_ECOLI]	1.21819	0.988748	0.342805	0.822645	0.361827	0.720042	0.276665	1.48809	1.2639	1.11543	0.70495
P07026	sdiA	Regulatory protein SdiA OS=Escherichia coli (strain K12) GN=sdiA PE=1 SV=2 - [SDIA_ECOLI]	0.999425	0.63822	0.369065	0.729782	0.452193	0.65619
P10408	secA	Protein translocase subunit SecA OS=Escherichia coli (strain K12) GN=secA PE=1 SV=2 - [SECA_ECOLI]	0.985914	0.611454	0.434192	0.579742	0.276645	0.765518	0.504053	1.43607	1.22107	1.44254	0.83714
P0AG86	secB	Protein-export protein SecB OS=Escherichia coli (strain K12) GN=secB PE=1 SV=1 - [SECB_ECOLI]	0.994196	3.63654	2.11646	4.92824	2.04806	2.93555	0.380903	1.30498	1.04377	1.23636	0.891315
P0AG90	secD	Protein translocase subunit SecD OS=Escherichia coli (strain K12) GN=secD PE=1 SV=1 - [SECD_ECOLI]	1.09652	0.827248	0.482633	0.904227	0.399392	0.932358	0.607116	1.8881	1.4997	1.76073	0.932062
P0AG96	secE	Preprotein translocase subunit SecE OS=Escherichia coli (strain K12) GN=secE PE=1 SV=1 - [SECE_ECOLI]	0.899467	1.39813	0.850084	1.33994	0.572657	0.901255
P0AG99	secG	Protein-export membrane protein SecG OS=Escherichia coli (strain K12) GN=secG PE=1 SV=1 - [SECG_ECOLI]	0.851343	0.56259	0.614873	0.843563	0.729755	0.640441
P0AGA2	secY	Protein translocase subunit SecY OS=Escherichia coli (strain K12) GN=secY PE=1 SV=1 - [SECY_ECOLI]		1.0677	0.489193	0.723525	0.253093	0.917724
P0A821	selA	L-seryl-tRNA(Sec) selenium transferase OS=Escherichia coli (strain K12) GN=selA PE=1 SV=1 - [SELA_ECOLI]		0.693657	0.472814	0.739544	0.390761	0.911557
P14081	selB	Selenocysteine-specific elongation factor OS=Escherichia coli (strain K12) GN=selB PE=1 SV=3 - [SELB_ECOLI]		0.945071	0.491463	1.24145	0.588459	0.817547
P16456	selD	Selenide, water dikinase OS=Escherichia coli (strain K12) GN=selD PE=1 SV=1 - [SELD_ECOLI]	1.30399	0.736227	0.482961	0.956717	0.536649	0.773783	0.421612	1.55607	1.63228	1.69159	1.21315
P33667	selU	tRNA 2-selenouridine synthase OS=Escherichia coli (strain K12) GN=selU PE=1 SV=2 - [SELU_ECOLI]	1.13862	0.823171	0.447684	1.01483	0.669954	0.774264
P0AFY8	seqA	Negative modulator of initiation of replication OS=Escherichia coli (strain K12) GN=seqA PE=1 SV=1 - [SEQA_ECOLI]	1.29875	1.26737	0.67231	2.43195	1.42124	0.991289
P0A9T0	serA	D-3-phosphoglycerate dehydrogenase OS=Escherichia coli (strain K12) GN=serA PE=1 SV=2 - [SERA_ECOLI]	0.470658	1.08111	0.63521	0.818066	0.389594	1.30759	0.734487	2.49728	1.93261	2.3135	1.808
P0AGB0	serB	Phosphoserine phosphatase OS=Escherichia coli (strain K12) GN=serB PE=1 SV=1 - [SERB_ECOLI]	1.40981	0.880195	0.51322	1.41249	0.994259	0.867223
P23721	serC	Phosphoserine aminotransferase OS=Escherichia coli (strain K12) GN=serC PE=1 SV=4 - [SERC_ECOLI]	0.963404	0.953475	0.564864	1.12475	0.674161	1.04062	0.554409	1.97788	1.76911	2.02424	1.25777
P0A8L1	serS	Serine--tRNA ligase OS=Escherichia coli (strain K12) GN=serS PE=1 SV=1 - [SYS_ECOLI]	0.749068	0.80586	0.531227	0.939305	0.51837	0.929567	0.441407	1.52843	1.35875	1.69426	1.04258
P31675	setA	Sugar efflux transporter A OS=Escherichia coli (strain K12) GN=setA PE=1 SV=3 - [SETA_ECOLI]	2.03604
P77249	sfmC	Chaperone protein SfmC OS=Escherichia coli (strain K12) GN=sfmC PE=3 SV=1 - [SFMC_ECOLI]	1.83941
P0A823	sfsA	Sugar fermentation stimulation protein A OS=Escherichia coli (strain K12) GN=sfsA PE=1 SV=1 - [SFSA_ECOLI]	1.32079						0.344637	1.49389	1.45505	1.59279	0.799123
P37678	sgbH	3-keto-L-gulonate-6-phosphate decarboxylase SgbH OS=Escherichia coli (strain K12) GN=sgbH PE=1 SV=1 - [SGBH_ECOLI]		2.10225	0.886014	2.16872	1.15536	1.02267
P0AGM5	sirB1	Protein sirB1 OS=Escherichia coli (strain K12) GN=sirB1 PE=3 SV=1 - [SIRB1_ECOLI]		3.11183	1.06703	4.58259	2.09059	1.15183
P76502	sixA	Phosphohistidine phosphatase SixA OS=Escherichia coli (strain K12) GN=sixA PE=1 SV=1 - [SIXA_ECOLI]	1.09493	0.488168	0.380793	0.801795	0.46102	0.590285
P0AEU7	skp	Chaperone protein skp OS=Escherichia coli (strain K12) GN=skp PE=1 SV=1 - [SKP_ECOLI]	1.48352	0.804781	0.497101	1.2529	0.743368	0.870458	0.263717	2.32781	1.93696	1.97349	1.03945
P0C093	slmA	Nucleoid occlusion factor SlmA OS=Escherichia coli (strain K12) GN=slmA PE=1 SV=1 - [SLMA_ECOLI]	1.19499	1.3067	0.538273	1.79389	1.00105	0.886251	0.428513	1.22138	1.12819	1.17362	0.718502
P37194	slp	Outer membrane protein slp OS=Escherichia coli (strain K12) GN=slp PE=1 SV=1 - [SLP_ECOLI]	3.36245	1.0749	0.664117	1.54211	1.18224	0.434601	0.164923	1.39892	1.21328	0.813484	0.442016
P0AGC3	slt	Soluble lytic murein transglycosylase OS=Escherichia coli (strain K12) GN=slt PE=1 SV=1 - [SLT_ECOLI]	1.98412	0.921982	0.394608	1.33403	1.05442	0.651349	0.258208	0.90324	0.885096	0.800081	0.573924
P0A8W2	slyA	Transcriptional regulator SlyA OS=Escherichia coli (strain K12) GN=slyA PE=3 SV=1 - [SLYA_ECOLI]	1.9785						0.383787	1.90026	1.67928	2.04686	1.3834
P0A905	slyB	Outer membrane lipoprotein SlyB OS=Escherichia coli (strain K12) GN=slyB PE=2 SV=1 - [SLYB_ECOLI]	1.40379	0.999553	0.681985	1.1548	0.780905	0.48108	0.16453	2.43619	1.94837	1.40626	0.66351
P0A9K9	slyD	FKBP-type peptidyl-prolyl cis-trans isomerase SlyD OS=Escherichia coli (strain K12) GN=slyD PE=1 SV=1 - [SLYD_ECOLI]	1.5669	0.955275	0.507071	1.42858	0.445541	0.885374	0.58181	1.44556	1.66821	1.67673	1.36334
P0A8R4	slyX	Protein SlyX OS=Escherichia coli (strain K12) GN=slyX PE=3 SV=1 - [SLYX_ECOLI]	1.00635
P0A832	smpB	SsrA-binding protein OS=Escherichia coli (strain K12) GN=smpB PE=1 SV=2 - [SSRP_ECOLI]	1.15813	0.980023	0.465985	0.834156	0.381197	0.971181
P76053	smrA	Probable DNA endonuclease SmrA OS=Escherichia coli (strain K12) GN=smrA PE=1 SV=1 - [SMRA_ECOLI]	1.44777
P36566	smtA	Protein SmtA OS=Escherichia coli (strain K12) GN=smtA PE=1 SV=2 - [SMTA_ECOLI]	1.42287
P00448	sodA	Superoxide dismutase [Mn] OS=Escherichia coli (strain K12) GN=sodA PE=1 SV=2 - [SODM_ECOLI]	1.85083	0.832494	0.561819	1.41051	0.778739	0.681062	0.626694	1.56891	2.31783	1.66923	1.09028
P0AGD3	sodB	Superoxide dismutase [Fe] OS=Escherichia coli (strain K12) GN=sodB PE=1 SV=2 - [SODF_ECOLI]	1.20615	1.27815	0.877922	1.28106	0.744539	1.28947	0.345234	1.93538	1.82345	2.45554	0.846002
P0AGD1	sodC	Superoxide dismutase [Cu-Zn] OS=Escherichia coli (strain K12) GN=sodC PE=1 SV=1 - [SODC_ECOLI]	1.63766	3.79433	1.36515	2.50256	1.50867	1.03171	0.529823	2.10521	1.67245	3.17025	1.17071
P0AG14	sohB	Probable protease SohB OS=Escherichia coli (strain K12) GN=sohB PE=1 SV=1 - [SOHB_ECOLI]	1.63617	0.713141	0.324125	0.99085	0.41526	0.576723
P40874	solA	N-methyl-L-tryptophan oxidase OS=Escherichia coli (strain K12) GN=solA PE=1 SV=1 - [MTOX_ECOLI]	0.940483	0.71958	0.494447	0.808599	0.443119	0.806505	0.366955	1.40646	1.0983	1.29746	0.884628
P31122	sotB	Sugar efflux transporter OS=Escherichia coli (strain K12) GN=sotB PE=1 SV=2 - [SOTB_ECOLI]		1.15058	0.70036	1.38441	0.664143	1.15068
P0ACS2	soxR	Redox-sensitive transcriptional activator SoxR OS=Escherichia coli (strain K12) GN=soxR PE=1 SV=1 - [SOXR_ECOLI]	1.06308
P21170	speA	Biosynthetic arginine decarboxylase OS=Escherichia coli (strain K12) GN=speA PE=1 SV=2 - [SPEA_ECOLI]	0.557314	0.76034	0.512219	0.825166	0.447614	0.9776	0.647353	1.89005	1.73292	2.15925	1.15384
P60651	speB	Agmatinase OS=Escherichia coli (strain K12) GN=speB PE=1 SV=1 - [SPEB_ECOLI]	0.59603	0.751252	0.41944	1.04383	0.48953	0.857907	0.60641	1.63247	1.45711	1.96711	1.15537
P21169	speC	Ornithine decarboxylase, constitutive OS=Escherichia coli (strain K12) GN=speC PE=1 SV=2 - [DCOR_ECOLI]	0.9292	0.824088	0.567919	0.948204	0.443957	0.884842	0.395414	1.84879	1.51177	1.55205	1.1956
P0A7F6	speD	S-adenosylmethionine decarboxylase proenzyme OS=Escherichia coli (strain K12) GN=speD PE=1 SV=1 - [SPED_ECOLI]	0.880325	1.12924	0.87715	0.838834	0.357566	0.98743	0.166006	1.44205	1.01962	1.29152	1.14943
P09158	speE	Spermidine synthase OS=Escherichia coli (strain K12) GN=speE PE=1 SV=2 - [SPEE_ECOLI]	0.834205	0.742322	0.544862	0.776696	0.465959	0.848654	0.54981	1.43973	1.5866	1.45694	1.29679
P24169	speF	Ornithine decarboxylase, inducible OS=Escherichia coli (strain K12) GN=speF PE=2 SV=1 - [DCOS_ECOLI]	0.861465
P0A951	speG	Spermidine N(1)-acetyltransferase OS=Escherichia coli (strain K12) GN=speG PE=1 SV=2 - [ATDA_ECOLI]	1.14655	0.506083	0.171426	0.453483	0.436826	0.312356
P77754	spy	Spheroplast protein Y OS=Escherichia coli (strain K12) GN=spy PE=1 SV=1 - [SPY_ECOLI]	1.52204	1.63711	0.750445	1.37374	0.520727	0.845419	0.225266	1.69	1.10946	1.75286	1.07116
P05707	srlD	Sorbitol-6-phosphate 2-dehydrogenase OS=Escherichia coli (strain K12) GN=srlD PE=1 SV=2 - [SRLD_ECOLI]	0.92052	0.562806	1.40864	0.858548	0.41972	1.29078
P15082	srlR	Glucitol operon repressor OS=Escherichia coli (strain K12) GN=srlR PE=2 SV=1 - [SRLR_ECOLI]		1.2855	0.796908	1.27532	0.489488	1.00914
P21507	srmB	ATP-dependent RNA helicase SrmB OS=Escherichia coli (strain K12) GN=srmB PE=1 SV=1 - [SRMB_ECOLI]		0.785003	0.501882	0.899338	0.769261	0.754064	0.479765	1.59082	1.47874	1.15601	0.952433
P0AGE0	ssb	Single-stranded DNA-binding protein OS=Escherichia coli (strain K12) GN=ssb PE=1 SV=2 - [SSB_ECOLI]	0.517771	0.796309	0.461568	0.927178	0.407433	0.555655
P31142	sseA	3-mercaptopyruvate sulfurtransferase OS=Escherichia coli (strain K12) GN=sseA PE=1 SV=3 - [THTM_ECOLI]	1.62666	0.697436	0.354353	0.858514	0.670633	0.478054	0.292439	1.22581	1.02296	1.19072	0.88566
P0AFZ1	sseB	Protein SseB OS=Escherichia coli (strain K12) GN=sseB PE=4 SV=1 - [SSEB_ECOLI]	1.07407	0.75715	0.386615	1.234	0.551386	0.543778
P0ACA3	sspA	Stringent starvation protein A OS=Escherichia coli (strain K12) GN=sspA PE=1 SV=2 - [SSPA_ECOLI]	1.20186	0.81212	0.474863	1.0678	0.717478	0.706812	0.360516	1.25152	1.26169	1.1711	0.820832
P0AFZ3	sspB	Stringent starvation protein B OS=Escherichia coli (strain K12) GN=sspB PE=1 SV=1 - [SSPB_ECOLI]	1.06549	0.890286	0.575961	1.07975	0.511914	0.803914
P0AGE4	sstT	Serine/threonine transporter SstT OS=Escherichia coli (strain K12) GN=sstT PE=1 SV=1 - [SSTT_ECOLI]		1.2394	0.479057	1.27833	0.79305	1.31503	0.461787	0.927997	0.895872	0.947008	0.813424
P76072	stfR	Side tail fiber protein homolog from lambdoid prophage Rac OS=Escherichia coli (strain K12) GN=stfR PE=3 SV=2 - [STFR_ECOLI]	0.66815
P27306	sthA	Soluble pyridine nucleotide transhydrogenase OS=Escherichia coli (strain K12) GN=sthA PE=1 SV=5 - [STHA_ECOLI]	1.19762	0.75171	0.35669	1.29866	0.859584	0.850273	0.748839	2.83678	3.74086	2.96615	0.868053
P0ACG1	stpA	DNA-binding protein StpA OS=Escherichia coli (strain K12) GN=stpA PE=3 SV=1 - [STPA_ECOLI]	0.833122	1.26016	0.552182	1.20969	0.510264	0.4939	0.212874	2.5017	1.52194	1.9222	0.632458
P0AFG3	sucA	2-oxoglutarate dehydrogenase E1 component OS=Escherichia coli (strain K12) GN=sucA PE=1 SV=1 - [ODO1_ECOLI]	1.30694	0.701522	0.337919	1.02955	0.456587	0.842595	0.537218	1.56507	1.61436	2.47147	0.887249
P0AFG6	sucB	Dihydrolipoyllysine-residue succinyltransferase component of 2-oxoglutarate dehydrogenase complex OS=Escherichia coli (strain K12) GN=sucB PE=1 SV=2 - [ODO2_ECOLI]	1.89023	0.74451	0.455432	1.28029	0.564513	1.49838	0.641792	1.02859	1.23448	1.46642	0.800778
P0A836	sucC	Succinyl-CoA ligase [ADP-forming] subunit beta OS=Escherichia coli (strain K12) GN=sucC PE=1 SV=1 - [SUCC_ECOLI]	1.56163	0.893351	0.336986	1.2696	0.662206	0.72295	0.330692	0.767682	0.988537	0.834268	0.756693
P0AGE9	sucD	Succinyl-CoA ligase [ADP-forming] subunit alpha OS=Escherichia coli (strain K12) GN=sucD PE=1 SV=2 - [SUCD_ECOLI]	1.63596	0.81946	0.325134	1.21147	0.681424	0.739771	0.347744	0.732405	0.940283	0.810638	0.753337
P77667	sufA	Protein SufA OS=Escherichia coli (strain K12) GN=sufA PE=1 SV=1 - [SUFA_ECOLI]	0.96548	0.899643	0.517663	0.703969	0.263924	0.383189	0.609486	2.83296	2.36729	1.7758	0.948331
P77522	sufB	FeS cluster assembly protein SufB OS=Escherichia coli (strain K12) GN=sufB PE=1 SV=2 - [SUFB_ECOLI]	0.369862	0.556028	0.411082	0.708852	0.335732	0.512043
P77499	sufC	Probable ATP-dependent transporter SufC OS=Escherichia coli (strain K12) GN=sufC PE=1 SV=1 - [SUFC_ECOLI]	1.3037	0.584312	0.368013	0.688031	0.467045	0.443794	0.452815	1.23329	1.16327	1.62635	0.921577
P77689	sufD	FeS cluster assembly protein SufD OS=Escherichia coli (strain K12) GN=sufD PE=1 SV=1 - [SUFD_ECOLI]	0.517216	0.401758	0.282503	0.514617	0.450642	0.33978
P76194	sufE	Cysteine desulfuration protein SufE OS=Escherichia coli (strain K12) GN=sufE PE=1 SV=1 - [SUFE_ECOLI]	0.942784	0.886471	0.752669	1.49046	1.18307	0.946992
P77444	sufS	Cysteine desulfurase OS=Escherichia coli (strain K12) GN=sufS PE=1 SV=1 - [SUFS_ECOLI]	1.44561	0.486863	0.332917	0.630113	0.531583	0.372969
P0ADG4	suhB	Inositol-1-monophosphatase OS=Escherichia coli (strain K12) GN=suhB PE=1 SV=1 - [SUHB_ECOLI]	0.788244	0.66243	0.624276	0.871509	0.72242	0.754205	0.465357	1.28625	1.67956	1.66378	0.966039
P0ABZ6	surA	Chaperone SurA OS=Escherichia coli (strain K12) GN=surA PE=1 SV=1 - [SURA_ECOLI]	1.20131	0.648	0.3701	0.816206	0.488562	0.656324	0.215354	1.36683	1.11798	1.28307	0.950136
P0A840	surE	5'/3'-nucleotidase SurE OS=Escherichia coli (strain K12) GN=surE PE=1 SV=1 - [SURE_ECOLI]	1.59181	0.823101	0.425138	1.02051	0.583864	0.634745	0.269209	1.09764	1.14048	1.06031	0.796133
P0A8U0	syd	Protein syd OS=Escherichia coli (strain K12) GN=syd PE=1 SV=1 - [SYDP_ECOLI]	1.42266	1.09506	0.662234	1.5264	0.774877	0.814298	0.411595	1.76335	1.33434	1.70193	0.878824
P0AF96	tabA	Toxin-antitoxin biofilm protein TabA OS=Escherichia coli (strain K12) GN=tabA PE=1 SV=1 - [TABA_ECOLI]	1.22505	0.484123	0.319696	0.524878	0.349983	0.816335	0.701812	1.66096	1.28079	1.80413	0.748145
P05100	tag	DNA-3-methyladenine glycosylase 1 OS=Escherichia coli (strain K12) GN=tag PE=1 SV=1 - [3MG1_ECOLI]	1.1994	0.974526	0.692107	1.29832	0.608753	0.833474
P0A867	talA	Transaldolase A OS=Escherichia coli (strain K12) GN=talA PE=1 SV=1 - [TALA_ECOLI]	2.24092	0.921631	0.345054	1.02799	1.02077	0.50798	0.279501	0.93368	0.763029	0.830326	0.794788
P0A870	talB	Transaldolase B OS=Escherichia coli (strain K12) GN=talB PE=1 SV=2 - [TALB_ECOLI]	1.33264	0.855061	0.477041	1.08146	0.717917	0.704028	0.369535	1.15306	1.23906	1.21622	0.759749
P76145	tam	Trans-aconitate 2-methyltransferase OS=Escherichia coli (strain K12) GN=tam PE=1 SV=3 - [TAM_ECOLI]	1.71441
P0ADE4	tamA	Translocation and assembly module TamA OS=Escherichia coli (strain K12) GN=tamA PE=1 SV=1 - [TAMA_ECOLI]	1.319	0.789881	0.453457	1.08739	0.637859	0.678916	0.261332	1.53935	1.30071	1.42672	0.881345
P39321	tamB	Translocation and assembly module TamB OS=Escherichia coli (strain K12) GN=tamB PE=1 SV=2 - [TAMB_ECOLI]	1.37177	0.781956	0.404861	0.965391	0.667389	0.643807	0.388976	1.11228	1.01047	1.13617	0.776371
P07018	tap	Methyl-accepting chemotaxis protein IV OS=Escherichia coli (strain K12) GN=tap PE=1 SV=2 - [MCP4_ECOLI]	0.250742	0.18874	0.24225	0.161446	0.0931221	1.1728
P07017	tar	Methyl-accepting chemotaxis protein II OS=Escherichia coli (strain K12) GN=tar PE=1 SV=2 - [MCP2_ECOLI]	0.26241	0.476033	0.445668	0.33074	0.0905486	1.06595	4.11292	1.98159	3.39395	5.44683	8.34457
P0A9T4	tas	Protein tas OS=Escherichia coli (strain K12) GN=tas PE=1 SV=1 - [TAS_ECOLI]	1.26815	1.17693	0.609592	1.11891	0.664631	1.13226
P69428	tatA	Sec-independent protein translocase protein TatA OS=Escherichia coli (strain K12) GN=tatA PE=1 SV=1 - [TATA_ECOLI]	1.87684	1.95524	0.909099	3.42312	1.34531	1.12531	0.632465	3.38721	2.65534	3.43861	0.962181
P69425	tatB	Sec-independent protein translocase protein TatB OS=Escherichia coli (strain K12) GN=tatB PE=1 SV=1 - [TATB_ECOLI]	1.63005	1.12006	0.817607	1.57525	0.910557	0.748749	0.515762	1.4436	1.20274	1.25243	0.821684
P69423	tatC	Sec-independent protein translocase protein TatC OS=Escherichia coli (strain K12) GN=tatC PE=1 SV=2 - [TATC_ECOLI]	1.86651
P27859	tatD	Tat-linked quality control protein TatD OS=Escherichia coli (strain K12) GN=tatD PE=1 SV=3 - [TATD_ECOLI]	1.91239	1.03673	0.666263	1.87549	1.09632	0.984866	0.456618	1.68209	1.69812	1.62654	1.03837
P0A843	tatE	Sec-independent protein translocase protein TatE OS=Escherichia coli (strain K12) GN=tatE PE=1 SV=1 - [TATE_ECOLI]	1.18905	0.901959	0.647689	1.14447	0.645105	0.738014
Q46927	tcdA	Uncharacterized protein YgdL OS=Escherichia coli (strain K12) GN=ygdL PE=3 SV=1 - [YGDL_ECOLI]	1.66436	0.716045	0.463263	0.872459	0.516369	0.74169
P0ACQ7	tdcA	HTH-type transcriptional regulator TdcA OS=Escherichia coli (strain K12) GN=tdcA PE=4 SV=1 - [TDCA_ECOLI]	0.778065
P0AGF6	tdcB	L-threonine dehydratase catabolic TdcB OS=Escherichia coli (strain K12) GN=tdcB PE=1 SV=1 - [TDCB_ECOLI]	2.08996	0.903165	0.622626	3.99914	6.91209	0.769091
P42632	tdcE	PFL-like enzyme TdcE OS=Escherichia coli (strain K12) GN=tdcE PE=1 SV=2 - [TDCE_ECOLI]		0.836521	0.563034	1.78955	2.9304	0.727014
P0AGL2	tdcF	Putative reactive intermediate deaminase TdcF OS=Escherichia coli (strain K12) GN=tdcF PE=1 SV=1 - [TDCF_ECOLI]		0.600777	0.268538	1.56756	1.84784	0.584544
P42630	tdcG	L-serine dehydratase TdcG OS=Escherichia coli (strain K12) GN=tdcG PE=1 SV=4 - [TDCG_ECOLI]		0.535357	0.32299	1.4037	1.94855	0.658435
P07913	tdh	L-threonine 3-dehydrogenase OS=Escherichia coli (strain K12) GN=tdh PE=1 SV=1 - [TDH_ECOLI]	1.48635	0.766738	0.30968	1.00241	0.770342	0.416166	0.293976	0.852835	0.872154	0.761217	0.470668
P23331	tdk	Thymidine kinase OS=Escherichia coli (strain K12) GN=tdk PE=3 SV=1 - [KITH_ECOLI]	1.16065	0.805396	0.58215	1.19267	0.72557	0.703809	0.532589	1.72575	1.76268	1.6263	0.940415
P25397	tehB	Tellurite methyltransferase OS=Escherichia coli (strain K12) GN=tehB PE=1 SV=1 - [TEHB_ECOLI]	1.19374	0.658082	0.47664	1.17572	0.683262	0.842223	0.402125	1.08693	0.991086	1.08361	0.651664
P0ADA1	tesA	Acyl-CoA thioesterase I OS=Escherichia coli (strain K12) GN=tesA PE=1 SV=1 - [TESA_ECOLI]	1.2262	0.810552	0.500299	0.965871	0.531224	0.760896	0.377003	1.46322	1.36832	1.64059	1.07049
P0AGG2	tesB	Acyl-CoA thioesterase 2 OS=Escherichia coli (strain K12) GN=tesB PE=1 SV=2 - [TESB_ECOLI]	1.07546	0.96049	0.453914	0.699985	0.45541	0.516091	0.35656	0.953924	0.710978	0.757955	0.566539
Q29443	TF	*CON* Serotransferrin OS=Bos taurus GN=TF PE=2 SV=1 - [TRFE_BOVIN]		0.308386	0.122045	0.560693	0.509245	0.225763			0.550018	0.535629	0.178172
P76155	tfaQ	Tail fiber assembly protein homolog from lambdoid prophage Qin OS=Escherichia coli (strain K12) GN=tfaQ PE=3 SV=2 - [TFAQ_ECOLI]	0.974508
P0A847	tgt	Queuine tRNA-ribosyltransferase OS=Escherichia coli (strain K12) GN=tgt PE=1 SV=1 - [TGT_ECOLI]	0.779305	0.703129	0.595014	0.688478	0.373108	0.827376	1.18435	4.43147	4.35757	5.29135	1.15455
P31550	thiB	Thiamine-binding periplasmic protein OS=Escherichia coli (strain K12) GN=thiB PE=1 SV=2 - [THIB_ECOLI]	1.44661	0.439055	0.183938	0.968612	1.41483	0.367717
P30139	thiG	Thiazole synthase OS=Escherichia coli (strain K12) GN=thiG PE=1 SV=3 - [THIG_ECOLI]		0.94268	0.45568	2.39234	1.88003	0.644252
P77718	thiI	tRNA sulfurtransferase OS=Escherichia coli (strain K12) GN=thiI PE=1 SV=1 - [THII_ECOLI]	1.07416	1.34306	0.788854	1.16635	0.369102	1.28679	0.846386	3.74639	3.09134	3.72385	1.00433
P0AGG0	thiL	Thiamine-monophosphate kinase OS=Escherichia coli (strain K12) GN=thiL PE=1 SV=1 - [THIL_ECOLI]	1.53963	0.728475	0.519416	0.800041	0.474795	0.906255
P00561	thrA	Bifunctional aspartokinase/homoserine dehydrogenase 1 OS=Escherichia coli (strain K12) GN=thrA PE=1 SV=2 - [AK1H_ECOLI]	0.552135	0.792115	0.478242	0.596899	0.302435	1.11978	0.615411	1.52251	1.28646	1.58708	1.47204
P00547	thrB	Homoserine kinase OS=Escherichia coli (strain K12) GN=thrB PE=1 SV=2 - [KHSE_ECOLI]	0.517155	0.881805	0.644277	0.834734	0.310908	1.28289	0.537902	2.00712	1.75743	2.20637	1.18487
P00934	thrC	Threonine synthase OS=Escherichia coli (strain K12) GN=thrC PE=1 SV=1 - [THRC_ECOLI]	0.710183	0.712336	0.630953	0.567677	0.264156	1.00403	0.385585	1.91913	1.44731	2.15151	1.26039
P0A8M3	thrS	Threonine--tRNA ligase OS=Escherichia coli (strain K12) GN=thrS PE=1 SV=1 - [SYT_ECOLI]	0.781664	0.696326	0.485125	0.580419	0.254051	0.821114	0.49466	1.41468	1.1727	1.37892	0.780507
P0A884	thyA	Thymidylate synthase OS=Escherichia coli (strain K12) GN=thyA PE=1 SV=1 - [TYSY_ECOLI]	1.62065	0.807285	0.429913	1.17641	0.765456	0.727418	0.386511	1.2994	1.43156	1.21485	1.2158
P0A850	tig	Trigger factor OS=Escherichia coli (strain K12) GN=tig PE=1 SV=1 - [TIG_ECOLI]	0.966719	0.887169	0.568348	0.858101	0.335338	0.66212	0.396091	1.72929	1.34275	1.62074	0.951342
P27302	tktA	Transketolase 1 OS=Escherichia coli (strain K12) GN=tktA PE=1 SV=5 - [TKT1_ECOLI]	0.74285	0.86388	0.530808	1.21122	0.679162	0.891067	0.481456	1.95858	1.53018	1.67866	1.0744
P33570	tktB	Transketolase 2 OS=Escherichia coli (strain K12) GN=tktB PE=1 SV=1 - [TKT2_ECOLI]	1.61772	0.976808	0.396939	0.912922	0.916593	0.562551	0.315711	0.959244	0.716867	0.780992	0.660855
P0AGG8	tldD	Protein TldD OS=Escherichia coli (strain K12) GN=tldD PE=1 SV=1 - [TLDD_ECOLI]	1.17449	1.02681	0.597567	1.24625	0.734447	0.877266	0.362951	1.32767	1.28208	1.22003	0.777527
P76562	tmcA	tRNA(Met) cytidine acetyltransferase TmcA OS=Escherichia coli (strain K12) GN=tmcA PE=1 SV=1 - [TMCA_ECOLI]	1.63802						0.811488	1.84701	1.88281	2.31105	0.902582
P0A720	tmk	Thymidylate kinase OS=Escherichia coli (strain K12) GN=tmk PE=1 SV=1 - [KTHY_ECOLI]	1.29063	0.857123	0.540053	1.26487	0.740844	0.751764	0.365273	1.35398	1.33729	1.25582	0.924647
P0A853	tnaA	Tryptophanase OS=Escherichia coli (strain K12) GN=tnaA PE=1 SV=1 - [TNAA_ECOLI]	2.188	1.60688	0.498117	13.5047	2.05181	0.936374
P19934	tolA	Protein TolA OS=Escherichia coli (strain K12) GN=tolA PE=1 SV=1 - [TOLA_ECOLI]	1.40862	1.17013	0.705054	1.19672	0.531819	0.879081
P0A855	tolB	Protein TolB OS=Escherichia coli (strain K12) GN=tolB PE=1 SV=1 - [TOLB_ECOLI]	1.33807	0.82392	0.404815	1.15888	0.815704	0.612005	0.159018	1.19886	1.13875	1.05511	0.804806
P02930	tolC	Outer membrane protein TolC OS=Escherichia coli (strain K12) GN=tolC PE=1 SV=3 - [TOLC_ECOLI]	1.8352	0.802479	0.4496	1.0202	0.72987	0.623328	0.259758	1.35082	1.18505	1.19458	0.816227
P0ABU9	tolQ	Protein TolQ OS=Escherichia coli (strain K12) GN=tolQ PE=1 SV=1 - [TOLQ_ECOLI]	1.1613
P0ABV6	tolR	Protein TolR OS=Escherichia coli (strain K12) GN=tolR PE=1 SV=1 - [TOLR_ECOLI]	1.28912
P02929	tonB	Protein TonB OS=Escherichia coli (strain K12) GN=tonB PE=1 SV=2 - [TONB_ECOLI]	1.07791	0.378596	0.28536	0.37844	0.138327	0.254599	0.502604	1.81623	1.55511	1.15436	0.852978
P06612	topA	DNA topoisomerase 1 OS=Escherichia coli (strain K12) GN=topA PE=1 SV=2 - [TOP1_ECOLI]	0.529112	0.689571	0.503401	0.635176	0.294709	0.77308	0.456965	1.83873	1.45436	1.70297	0.977844
P33225	torA	Trimethylamine-N-oxide reductase 1 OS=Escherichia coli (strain K12) GN=torA PE=1 SV=2 - [TORA_ECOLI]	1.37897
Q2EES9	torI	Response regulator inhibitor for tor operon OS=Escherichia coli (strain K12) GN=torI PE=1 SV=1 - [TORI_ECOLI]		0.667643	0.346771	1.49792	0.558639	0.771137
P38684	torR	TorCAD operon transcriptional regulatory protein TorR OS=Escherichia coli (strain K12) GN=torR PE=1 SV=2 - [TORR_ECOLI]		0.944988	0.590359	1.14032	0.790188	0.811771
P39453	torS	Sensor protein TorS OS=Escherichia coli (strain K12) GN=torS PE=1 SV=4 - [TORS_ECOLI]		1.79379	0.870962	1.23386	0.529595	1.49115
P52005	torY	Cytochrome c-type protein TorY OS=Escherichia coli (strain K12) GN=torY PE=1 SV=2 - [TORY_ECOLI]		0.789726	0.420322	0.61315	0.341457	0.722519
P46923	torZ	Trimethylamine-N-oxide reductase 2 OS=Escherichia coli (strain K12) GN=torZ PE=1 SV=2 - [TORZ_ECOLI]		1.828	0.491309	2.25253	1.16953	0.817964
P0A858	tpiA	Triosephosphate isomerase OS=Escherichia coli (strain K12) GN=tpiA PE=1 SV=1 - [TPIS_ECOLI]	1.72325	0.960611	0.516721	1.59253	0.91914	0.820178	0.389848	1.15818	1.37348	1.12143	0.709202
P0A862	tpx	Thiol peroxidase OS=Escherichia coli (strain K12) GN=tpx PE=1 SV=2 - [TPX_ECOLI]	1.36397	1.11282	0.687779	1.29243	0.66669	0.850018	0.251771	1.58802	1.5053	1.56192	1.03388
P13482	treA	Periplasmic trehalase OS=Escherichia coli (strain K12) GN=treA PE=1 SV=1 - [TREA_ECOLI]	1.62283	0.843383	0.348049	0.901258	0.74921	0.58471	0.499133	1.13549	1.33041	1.64474	1.04116
P28904	treC	Trehalose-6-phosphate hydrolase OS=Escherichia coli (strain K12) GN=treC PE=3 SV=3 - [TREC_ECOLI]	3.33021	1.07263	0.57063	1.79834	1.99382	0.678871	0.491655	1.63449	1.91071	1.78093	0.823594
P62601	treF	Cytoplasmic trehalase OS=Escherichia coli (strain K12) GN=treF PE=1 SV=1 - [TREF_ECOLI]	2.31537	0.874867	0.536373	0.940934	0.768582	0.595025	0.422683	1.76294	1.42901	1.76756	1.2902
P0AGI8	trkA	Trk system potassium uptake protein TrkA OS=Escherichia coli (strain K12) GN=trkA PE=1 SV=1 - [TRKA_ECOLI]		1.55714	0.652638	2.11712	1.33958	1.01444
P23003	trmA	tRNA (uracil(54)-C(5))-methyltransferase OS=Escherichia coli (strain K12) GN=trmA PE=1 SV=1 - [TRMA_ECOLI]	0.858364	0.873952	0.57683	1.10696	0.600725	0.931505	0.430777	1.12557	1.18993	1.11406	0.82204
P0A8I5	trmB	tRNA (guanine-N(7)-)-methyltransferase OS=Escherichia coli (strain K12) GN=trmB PE=1 SV=1 - [TRMB_ECOLI]	1.49401	0.527003	0.299877	0.82685	0.637909	0.474302
P0A873	trmD	tRNA (guanine-N(1)-)-methyltransferase OS=Escherichia coli (strain K12) GN=trmD PE=1 SV=1 - [TRMD_ECOLI]	1.06436	0.757395	0.560414	1.01567	0.546509	0.876807	0.516792	1.49081	1.42609	1.65589	0.988194
P0AGJ2	trmH	tRNA (guanosine(18)-2'-O)-methyltransferase OS=Escherichia coli (strain K12) GN=trmH PE=1 SV=1 - [TRMH_ECOLI]	1.64034	0.736229	0.47261	0.88819	0.613911	0.698387
P0AE01	trmJ	tRNA (cytidine/uridine-2'-O-)-methyltransferase TrmJ OS=Escherichia coli (strain K12) GN=trmJ PE=1 SV=1 - [TRMJ_ECOLI]	1.29458	0.753109	0.422484	1.08444	0.645873	0.772778
P0AGJ7	trmL	tRNA (cytidine(34)-2'-O)-methyltransferase OS=Escherichia coli (strain K12) GN=trmL PE=1 SV=1 - [TRML_ECOLI]	1.22398	0.66333	0.42261	1.12215	0.749264	0.809116	0.409948	1.44091	1.49683	1.55662	0.908496
P0A877	trpA	Tryptophan synthase alpha chain OS=Escherichia coli (strain K12) GN=trpA PE=1 SV=1 - [TRPA_ECOLI]	1.18768	0.644633	0.4556	1.19113	0.6997	0.811603	0.414647	1.15994	1.10493	1.19197	1.04213
P0A879	trpB	Tryptophan synthase beta chain OS=Escherichia coli (strain K12) GN=trpB PE=1 SV=2 - [TRPB_ECOLI]	1.21149	0.599085	0.488715	1.34118	0.635384	0.837909	0.415519	1.29284	1.10044	1.10759	1.03404
P00909	trpC	Tryptophan biosynthesis protein TrpCF OS=Escherichia coli (strain K12) GN=trpC PE=1 SV=3 - [TRPC_ECOLI]	1.15933	0.619585	0.476731	1.22349	0.834102	0.853391	0.430703	1.1013	1.1605	1.44587	1.00743
P00895	trpE	Anthranilate synthase component 1 OS=Escherichia coli (strain K12) GN=trpE PE=1 SV=2 - [TRPE_ECOLI]	0.783319	0.54804	0.38947	1.03521	0.501645	0.967739	0.646435	1.40129	1.60893	1.45239	1.49774
P00904	trpGD	Anthranilate synthase component II OS=Escherichia coli (strain K12) GN=trpD PE=1 SV=3 - [TRPG_ECOLI]	0.895212	0.629843	0.405476	0.936532	0.482378	1.01234
P0A881	trpR	Trp operon repressor OS=Escherichia coli (strain K12) GN=trpR PE=1 SV=2 - [TRPR_ECOLI]	1.56784	0.95267	0.846266	1.55403	0.651461	0.678736	0.729015	1.74163	1.4608	1.79023	1.40894
P00954	trpS	Tryptophan--tRNA ligase OS=Escherichia coli (strain K12) GN=trpS PE=1 SV=3 - [SYW_ECOLI]	1.53153	0.723626	0.37201	1.01762	0.852888	0.667027	0.579013	1.68198	1.39337	2.00688	0.970055
P07649	truA	tRNA pseudouridine synthase A OS=Escherichia coli (strain K12) GN=truA PE=1 SV=1 - [TRUA_ECOLI]	1.00906	1.33081	0.838635	2.01384	0.979289	1.05047
P60340	truB	tRNA pseudouridine synthase B OS=Escherichia coli (strain K12) GN=truB PE=1 SV=1 - [TRUB_ECOLI]	0.95193	0.448516	0.356212	0.673254	0.561677	0.652294	0.171533	1.62737	1.23668	1.59935	1.02075
P0AA41	truC	tRNA pseudouridine synthase C OS=Escherichia coli (strain K12) GN=truC PE=1 SV=1 - [TRUC_ECOLI]	0.984068	1.23433	0.664594	1.42536	0.776342	1.08016
Q57261	truD	tRNA pseudouridine synthase D OS=Escherichia coli (strain K12) GN=truD PE=1 SV=1 - [TRUD_ECOLI]	1.21734	0.735658	0.477832	1.12176	0.816219	0.687665
P0AA25	trxA	Thioredoxin-1 OS=Escherichia coli (strain K12) GN=trxA PE=1 SV=2 - [THIO_ECOLI]	1.60763	1.12739	0.567624	1.40613	0.655531	0.773675	0.212294	1.36905	1.18773	1.37134	1.02119
P0A9P4	trxB	Thioredoxin reductase OS=Escherichia coli (strain K12) GN=trxB PE=1 SV=2 - [TRXB_ECOLI]	1.47796	0.80332	0.492315	1.0448	0.689065	0.669078	0.405304	1.77813	1.60158	1.97929	0.746369
P0AGG4	trxC	Thioredoxin-2 OS=Escherichia coli (strain K12) GN=trxC PE=1 SV=1 - [THIO2_ECOLI]	1.13352						0.760062	4.47384	3.76283	5.07084	1.24092
P76256	tsaB	Uncharacterized protein YeaZ OS=Escherichia coli (strain K12) GN=yeaZ PE=1 SV=1 - [YEAZ_ECOLI]	1.08058	0.70235	0.468775	1.06835	0.554174	0.852008
P45748	tsaC	tRNA threonylcarbamoyladenosine biosynthesis protein RimN OS=Escherichia coli (strain K12) GN=rimN PE=1 SV=2 - [RIMN_ECOLI]	1.03025	0.744252	0.445869	0.917023	0.595989	0.758298	0.452714	1.05758	1.23155	1.09246	0.754991
P05852	tsaD	Probable tRNA threonylcarbamoyladenosine biosynthesis protein Gcp OS=Escherichia coli (strain K12) GN=gcp PE=1 SV=2 - [GCP_ECOLI]	1.31767	0.703335	0.407793	1.18778	0.973257	0.7836	0.499447	1.96748	1.82331	2.75198	1.55899
P0AF67	tsaE	UPF0079 ATP-binding protein YjeE OS=Escherichia coli (strain K12) GN=yjeE PE=3 SV=1 - [YJEE_ECOLI]	1.34891	0.793509	0.414757	0.966119	0.447727	0.749665	0.431814	1.39106	1.32314	1.13171	0.983631
P0A6P1	tsf	Elongation factor Ts OS=Escherichia coli (strain K12) GN=tsf PE=1 SV=2 - [EFTS_ECOLI]	1.05245	0.839551	0.527711	0.981094	0.493987	0.800158	0.344516	1.2011	1.16635	1.19309	1.01187
P02942	tsr	Methyl-accepting chemotaxis protein I OS=Escherichia coli (strain K12) GN=tsr PE=1 SV=2 - [MCP1_ECOLI]	0.335596	0.412945	0.403849	0.248614	0.197081	1.12438	4.03761	1.58467	3.08497	4.42538	8.63378
P0A927	tsx	Nucleoside-specific channel-forming protein tsx OS=Escherichia coli (strain K12) GN=tsx PE=1 SV=1 - [TSX_ECOLI]	0.723654	0.602759	0.26722	0.584498	0.538115	0.318965
P76055	ttcA	tRNA 2-thiocytidine biosynthesis protein TtcA OS=Escherichia coli (strain K12) GN=ttcA PE=1 SV=1 - [TTCA_ECOLI]	0.777051	0.699633	0.532153	0.880458	0.411255	0.964813	0.412374	1.39033	1.37562	1.46603	1.16328
P45463	ttdR	HTH-type transcriptional activator TtdR OS=Escherichia coli (strain K12) GN=ttdR PE=4 SV=2 - [TTDR_ECOLI]	1.40974
P0CE47	tufA	Elongation factor Tu 1 OS=Escherichia coli (strain K12) GN=tufA PE=1 SV=1 - [EFTU1_ECOLI]	1.24693	0.734333	0.449878	0.992641	0.618484	0.738784	0.405874	1.12779	1.18738	1.12015	0.875996
P16525	tus	DNA replication terminus site-binding protein OS=Escherichia coli (strain K12) GN=tus PE=1 SV=1 - [TUS_ECOLI]	1.6259
P45530	tusB	Protein TusB OS=Escherichia coli (strain K12) GN=tusB PE=1 SV=1 - [TUSB_ECOLI]	1.55926	1.81162	0.603036	1.31927	0.450446	0.87133
P45531	tusC	Protein TusC OS=Escherichia coli (strain K12) GN=tusC PE=1 SV=1 - [TUSC_ECOLI]	1.62048						0.357152	1.39042	1.17963	1.33919	0.711689
P45532	tusD	Sulfurtransferase TusD OS=Escherichia coli (strain K12) GN=tusD PE=1 SV=1 - [TUSD_ECOLI]	1.36678						0.442288	1.26648	1.31517	1.14817	0.766378
P0AB18	tusE	Sulfurtransferase TusE OS=Escherichia coli (strain K12) GN=tusE PE=1 SV=1 - [TUSE_ECOLI]	1.74515	0.989552	0.537449	1.39475	0.749856	0.69712
P32132	typA	GTP-binding protein TypA/BipA OS=Escherichia coli (strain K12) GN=typA PE=1 SV=2 - [TYPA_ECOLI]	1.2197	0.663715	0.45522	1.17046	0.775311	0.895336	0.449475	1.45609	1.32663	1.15751	1.06142
P07023	tyrA	T-protein OS=Escherichia coli (strain K12) GN=tyrA PE=1 SV=1 - [TYRA_ECOLI]	2.16907	3.00692	1.17152	3.44799	2.37215	1.94747	0.575399	6.11185	1.73655	5.96116	1.29062
P04693	tyrB	Aromatic-amino-acid aminotransferase OS=Escherichia coli (strain K12) GN=tyrB PE=1 SV=1 - [TYRB_ECOLI]	1.86634	0.90768	0.387225	1.10179	0.736195	0.790286	0.279654	1.05436	0.913083	1.03322	0.970225
P07604	tyrR	Transcriptional regulatory protein TyrR OS=Escherichia coli (strain K12) GN=tyrR PE=1 SV=2 - [TYRR_ECOLI]		0.816469	0.532582	0.786146	0.379862	0.800596	2.58705	8.29759	6.01078	8.04166	1.21403
P0AGJ9	tyrS	Tyrosine--tRNA ligase OS=Escherichia coli (strain K12) GN=tyrS PE=1 SV=2 - [SYY_ECOLI]	1.33988	0.860825	0.462338	1.1552	0.70913	0.760055	0.361492	1.41752	1.23942	1.33987	0.715562
P26602	ubiC	Chorismate--pyruvate lyase OS=Escherichia coli (strain K12) GN=ubiC PE=1 SV=2 - [UBIC_ECOLI]	2.26121	1.20794	0.792037	2.82328	1.92693	0.923223	0.27167	0.517228	1.17013	0.896673	0.423738
P0AAB4	ubiD	3-octaprenyl-4-hydroxybenzoate carboxy-lyase OS=Escherichia coli (strain K12) GN=ubiD PE=1 SV=1 - [UBID_ECOLI]							0.414969	1.54085	1.13196	1.38613	0.618408
P0A887	ubiE	Ubiquinone/menaquinone biosynthesis methyltransferase ubiE OS=Escherichia coli (strain K12) GN=ubiE PE=1 SV=1 - [UBIE_ECOLI]	1.66773	0.796786	0.501026	1.15802	0.964291	0.744893	0.351222	1.45947	1.45692	1.42725	0.805948
P75728	ubiF	2-octaprenyl-3-methyl-6-methoxy-1,4-benzoquinol hydroxylase OS=Escherichia coli (strain K12) GN=ubiF PE=1 SV=1 - [UBIF_ECOLI]	1.63175	0.708708	0.332419	1.17419	1.19901	0.540483	0.248797	1.04379	1.08842	0.993386	0.785588
P17993	ubiG	3-demethylubiquinone-9 3-methyltransferase OS=Escherichia coli (strain K12) GN=ubiG PE=1 SV=1 - [UBIG_ECOLI]	1.3687	0.586983	0.40025	0.678321	0.49449	0.569034	0.369459	1.4011	1.20468	1.38435	0.955897
P25534	ubiH	2-octaprenyl-6-methoxyphenol hydroxylase OS=Escherichia coli (strain K12) GN=ubiH PE=1 SV=2 - [UBIH_ECOLI]		0.700453		1.19511	1.25829	0.618366
P25535	ubiI	Protein VisC OS=Escherichia coli (strain K12) GN=visC PE=3 SV=2 - [VISC_ECOLI]	1.19857	1.16934	0.573842	1.29718	0.852927	0.871064	0.150484	1.54827	1.27868	1.72609	1.11564
P0AG03	ubiX	3-octaprenyl-4-hydroxybenzoate carboxy-lyase OS=Escherichia coli (strain K12) GN=ubiX PE=3 SV=1 - [UBIX_ECOLI]		0.687139	0.488538	0.543102	0.343577	0.564463
P37440	ucpA	Oxidoreductase UcpA OS=Escherichia coli (strain K12) GN=ucpA PE=3 SV=3 - [UCPA_ECOLI]	0.805412	1.16954	0.70404	1.76182	0.808538	0.73354
P0A8F4	udk	Uridine kinase OS=Escherichia coli (strain K12) GN=udk PE=3 SV=1 - [URK_ECOLI]	1.35941	0.761869	0.703485	1.40056	0.903519	1.08658
P12758	udp	Uridine phosphorylase OS=Escherichia coli (strain K12) GN=udp PE=1 SV=3 - [UDP_ECOLI]	0.981764	0.970064	0.481121	1.16796	0.751439	0.793186	0.383159	1.26981	0.936852	1.29299	0.885736
P76373	ugd	UDP-glucose 6-dehydrogenase OS=Escherichia coli (strain K12) GN=ugd PE=1 SV=1 - [UDG_ECOLI]	1.53618	0.779356	0.377171	0.926144	0.55495	0.730607
P0AG80	ugpB	sn-glycerol-3-phosphate-binding periplasmic protein UgpB OS=Escherichia coli (strain K12) GN=ugpB PE=1 SV=1 - [UGPB_ECOLI]	1.54328	0.793203	0.180625	0.608764	0.567983	0.403325	0.438341	0.634703	0.547615	0.353104	0.496754
P10908	ugpQ	Glycerophosphoryl diester phosphodiesterase OS=Escherichia coli (strain K12) GN=ugpQ PE=1 SV=1 - [UGPQ_ECOLI]	1.70213	0.943593	0.42568	1.00445	0.83983	0.684021	0.613753	2.12285	1.97264	2.08655	0.63593
P0AGA6	uhpA	Transcriptional regulatory protein UhpA OS=Escherichia coli (strain K12) GN=uhpA PE=1 SV=1 - [UHPA_ECOLI]	1.8595	0.795881	0.433588	1.20788	0.70851	0.617535	0.37696	1.59869	1.45526	1.39011	1.07138
P0ACT6	uidR	HTH-type transcriptional regulator UidR OS=Escherichia coli (strain K12) GN=uidR PE=4 SV=1 - [UIDR_ECOLI]	1.07046	0.744185	0.577628	1.15822	0.69567	0.829851
P69822	ulaB	Ascorbate-specific phosphotransferase enzyme IIB component OS=Escherichia coli (strain K12) GN=ulaB PE=1 SV=1 - [ULAB_ECOLI]		1.05898	0.512166	1.51261	0.808161	0.835447
P39304	ulaD	3-keto-L-gulonate-6-phosphate decarboxylase UlaD OS=Escherichia coli (strain K12) GN=ulaD PE=1 SV=1 - [ULAD_ECOLI]		0.883776	0.561527	1.38098	0.770952	0.693422
P0A9W0	ulaR	HTH-type transcriptional regulator UlaR OS=Escherichia coli (strain K12) GN=ulaR PE=1 SV=1 - [ULAR_ECOLI]	0.950303	0.964488	0.515355	0.829616	0.557258	0.708603
P12295	ung	Uracil-DNA glycosylase OS=Escherichia coli (strain K12) GN=ung PE=1 SV=2 - [UNG_ECOLI]	0.839236	0.89762	0.533494	0.948792	0.524119	0.786726	0.385504	1.497	1.43806	1.97129	1.00308
P0A8F0	upp	Uracil phosphoribosyltransferase OS=Escherichia coli (strain K12) GN=upp PE=1 SV=1 - [UPP_ECOLI]	0.62965	0.624994	0.618873	0.650043	0.307729	0.856348	0.5883	1.77618	2.13494	2.02916	1.31621
P0AGM7	uraA	Uracil permease OS=Escherichia coli (strain K12) GN=uraA PE=1 SV=1 - [URAA_ECOLI]	0.485976	1.85282	1.24741	0.78391	0.404003	1.40715
P08390	usg	USG-1 protein OS=Escherichia coli (strain K12) GN=usg PE=1 SV=1 - [USG_ECOLI]	1.50197	0.758483	0.387392	1.02152	0.757779	0.647842	0.431875	1.26606	1.27232	1.39858	0.93996
P07024	ushA	Protein UshA OS=Escherichia coli (strain K12) GN=ushA PE=1 SV=2 - [USHA_ECOLI]	1.20791	0.91882	0.44929	0.822349	0.456081	0.638048	0.287088	0.988446	0.86188	0.906994	0.676164
P0AED0	uspA	Universal stress protein A OS=Escherichia coli (strain K12) GN=uspA PE=1 SV=2 - [USPA_ECOLI]	1.75081	0.879173	0.507121	0.877262	0.435443	0.688513	0.420078	1.19648	0.990035	1.12406	0.934766
P46888	uspC	Universal stress protein C OS=Escherichia coli (strain K12) GN=uspC PE=2 SV=1 - [USPC_ECOLI]		0.774115	1.52026	1.52784	1.47453	0.845216	0.425809	1.513	1.20047	3.94422	0.947445
P0AAB8	uspD	Universal stress protein D OS=Escherichia coli (strain K12) GN=uspD PE=2 SV=1 - [USPD_ECOLI]	1.94619	1.08995	0.48689	0.978686	0.550961	0.574395	0.219542	1.04445	0.701908	0.782486	0.600124
P0AAC0	uspE	Universal stress protein E OS=Escherichia coli (strain K12) GN=uspE PE=1 SV=2 - [USPE_ECOLI]	1.53425	0.847301	0.576354	0.847371	0.529541	0.982003	0.229848	1.53414	1.12467	1.33362	0.947734
P37903	uspF	Universal stress protein F OS=Escherichia coli (strain K12) GN=uspF PE=1 SV=2 - [USPF_ECOLI]	1.52604	0.818532	0.614101	0.504665	0.251391	0.690548	0.210546	1.84242	1.09044	1.80595	1.00117
P39177	uspG	Universal stress protein G OS=Escherichia coli (strain K12) GN=uspG PE=1 SV=2 - [USPG_ECOLI]	1.62156	0.869784	0.43387	0.684821	0.309603	0.690623
P43672	uup	ABC transporter ATP-binding protein uup OS=Escherichia coli (strain K12) GN=uup PE=1 SV=2 - [UUP_ECOLI]	0.952547	0.704259	0.460128	1.02146	0.606921	0.791342	0.459081	1.57272	1.41342	1.42967	1.1523
P0A698	uvrA	UvrABC system protein A OS=Escherichia coli (strain K12) GN=uvrA PE=1 SV=1 - [UVRA_ECOLI]	1.01589	1.19822	0.763997	1.02753	0.478605	1.00672	0.477794	2.45219	1.83183	2.10602	0.822926
P0A8F8	uvrB	UvrABC system protein B OS=Escherichia coli (strain K12) GN=uvrB PE=1 SV=2 - [UVRB_ECOLI]	1.37773	0.882162	0.427836	1.26265	0.908159	0.644055	0.900437	2.80604	1.94386	2.59085	1.32434
P0A8G0	uvrC	UvrABC system protein C OS=Escherichia coli (strain K12) GN=uvrC PE=1 SV=1 - [UVRC_ECOLI]	0.804948
P03018	uvrD	DNA helicase II OS=Escherichia coli (strain K12) GN=uvrD PE=1 SV=1 - [UVRD_ECOLI]	1.10012	0.947118	0.524205	1.15834	0.786746	0.791479	0.715522	2.05598	2.02165	1.96451	0.976615
P0AED5	uvrY	Response regulator UvrY OS=Escherichia coli (strain K12) GN=uvrY PE=1 SV=1 - [UVRY_ECOLI]	1.24888	0.65169	0.48636	0.988789	0.707045	0.71419
P42604	uxaA	Altronate hydrolase OS=Escherichia coli (strain K12) GN=uxaA PE=2 SV=3 - [UXAA_ECOLI]	1.6485	0.656209	0.36733	1.0055	0.566112	0.548518	0.312578	1.01253	1.0399	1.1215	0.981519
P0A6L7	uxaB	Altronate oxidoreductase OS=Escherichia coli (strain K12) GN=uxaB PE=1 SV=1 - [UXAB_ECOLI]	2.05519	0.724849	0.295707	1.09669	0.888903	0.710887
P0A8G3	uxaC	Uronate isomerase OS=Escherichia coli (strain K12) GN=uxaC PE=2 SV=1 - [UXAC_ECOLI]	0.958567	0.67344	0.319497	0.727837	0.44763	0.593324	0.764873	2.00718	1.6665	1.26257	1.97751
P24215	uxuA	Mannonate dehydratase OS=Escherichia coli (strain K12) GN=uxuA PE=1 SV=2 - [UXUA_ECOLI]	0.9945	0.690447	0.39884	0.836537	0.544634	0.611036	0.37638	0.958441	0.962845	1.01803	0.874952
P39160	uxuB	D-mannonate oxidoreductase OS=Escherichia coli (strain K12) GN=uxuB PE=3 SV=1 - [UXUB_ECOLI]	1.01946	0.671015	0.313885	0.768811	0.605525	0.641407	0.495853	0.8101	0.92381	0.942299	0.939657
P39161	uxuR	Uxu operon transcriptional regulator OS=Escherichia coli (strain K12) GN=uxuR PE=4 SV=1 - [UXUR_ECOLI]	1.49706	1.12038	0.640651	1.55378	0.913255	0.969744
P07118	valS	Valine--tRNA ligase OS=Escherichia coli (strain K12) GN=valS PE=1 SV=2 - [SYV_ECOLI]	0.905827	0.860453	0.531962	1.04394	0.611669	0.784294	0.410802	1.46167	1.31946	1.47408	0.812675
P09184	vsr	Very short patch repair protein OS=Escherichia coli (strain K12) GN=vsr PE=1 SV=3 - [VSR_ECOLI]	1.20738	0.769223	0.315099	0.967935	0.938719	0.465938
P0AC75	waaA	3-deoxy-D-manno-octulosonic acid transferase OS=Escherichia coli (strain K12) GN=waaA PE=1 SV=1 - [KDTA_ECOLI]		0.948885	0.452327	0.776348	0.475384	0.896551
P27242	waaU	Lipopolysaccharide 1,2-N-acetylglucosaminetransferase OS=Escherichia coli (strain K12) GN=waaU PE=4 SV=2 - [WAAU_ECOLI]	1.97156						0.472738	1.52026	1.52909	1.32432	0.593566
P37749	wbbI	Beta-1,6-galactofuranosyltransferase WbbI OS=Escherichia coli (strain K12) GN=wbbI PE=1 SV=1 - [WBBI_ECOLI]	1.17038	0.706872	0.461259	1.13454	1.07418	0.780103	0.462074	1.52777	1.70996	1.69383	0.917195
P37750	wbbJ	Putative lipopolysaccharide biosynthesis O-acetyl transferase WbbJ OS=Escherichia coli (strain K12) GN=wbbJ PE=3 SV=2 - [WBBJ_ECOLI]		0.754461	0.409966	1.07013	0.748123	0.813636
P37751	wbbK	Putative glycosyltransferase WbbK OS=Escherichia coli (strain K12) GN=wbbK PE=4 SV=1 - [WBBK_ECOLI]	1.04266	0.855047	0.439628	0.955882	0.691601	0.77226	0.54295	1.71311	1.49083	1.63595	0.95265
P36667	wbbL	Rhamnosyltransferase WbbL OS=Escherichia coli (strain K12) GN=wbbL PE=1 SV=1 - [WBBL_ECOLI]	1.11492
P27828	wecB	UDP-N-acetylglucosamine 2-epimerase OS=Escherichia coli (strain K12) GN=wecB PE=1 SV=2 - [WECB_ECOLI]	1.25024	0.837863	0.449588	1.18945	0.835868	0.786899	0.58551	0.996543	1.57481	1.3706	1.01406
P27829	wecC	UDP-N-acetyl-D-mannosamine dehydrogenase OS=Escherichia coli (strain K12) GN=wecC PE=3 SV=4 - [WECC_ECOLI]	1.18099	0.970794	0.506997	1.57814	1.21686	1.01909
P27832	wecD	dTDP-fucosamine acetyltransferase OS=Escherichia coli (strain K12) GN=wecD PE=3 SV=3 - [WECD_ECOLI]	1.3411	0.644429	0.388211	1.18035	0.864155	0.636137
P56258	wecF	4-alpha-L-fucosyltransferase OS=Escherichia coli (strain K12) GN=wecF PE=1 SV=2 - [WECF_ECOLI]	1.16956	0.838783	0.428546	1.17823	0.605719	0.759678	0.303155	0.866249	0.783242	1.14443	0.845477
P0A8G6	wrbA	Flavoprotein WrbA OS=Escherichia coli (strain K12) GN=wrbA PE=1 SV=2 - [WRBA_ECOLI]	2.21942	0.957704	0.354811	0.810053	0.763296	0.718065	0.340949	0.811835	0.700231	0.824988	0.559838
P76387	wzc	Tyrosine-protein kinase wzc OS=Escherichia coli (strain K12) GN=wzc PE=1 SV=2 - [WZC_ECOLI]	1.08228
P76372	wzzB	Chain length determinant protein OS=Escherichia coli (strain K12) GN=wzzB PE=1 SV=2 - [WZZB_ECOLI]	0.662082	0.598749	0.379718	0.454019	0.1913	0.643809
P0AG00	wzzE	Lipopolysaccharide biosynthesis protein WzzE OS=Escherichia coli (strain K12) GN=wzzE PE=1 SV=2 - [WZZE_ECOLI]	1.04395	0.847092	0.480136	0.872167	0.373652	0.745992
P23841	xapR	HTH-type transcriptional regulator XapR OS=Escherichia coli (strain K12) GN=xapR PE=4 SV=1 - [XAPR_ECOLI]							0.376154	1.02807	1.08932	1.00059	0.829863
Q46800	xdhB	Xanthine dehydrogenase FAD-binding subunit OS=Escherichia coli (strain K12) GN=xdhB PE=3 SV=1 - [XDHB_ECOLI]	1.28985
P0A8P6	xerC	Tyrosine recombinase XerC OS=Escherichia coli (strain K12) GN=xerC PE=1 SV=1 - [XERC_ECOLI]		0.872305	0.671697	1.0382	0.454592	0.687965	0.351867	1.65887	1.62721	1.47429	0.807109
P0A8P8	xerD	Tyrosine recombinase XerD OS=Escherichia coli (strain K12) GN=xerD PE=1 SV=1 - [XERD_ECOLI]		0.711897	0.544959	0.848044	0.525234	0.775553
P0A8G9	xseB	Exodeoxyribonuclease 7 small subunit OS=Escherichia coli (strain K12) GN=xseB PE=1 SV=2 - [EX7S_ECOLI]	1.06514
P09030	xthA	Exodeoxyribonuclease III OS=Escherichia coli (strain K12) GN=xthA PE=1 SV=4 - [EX3_ECOLI]	1.31666	0.597356	0.394196	0.812865	0.630651	0.563339
P09099	xylB	Xylulose kinase OS=Escherichia coli (strain K12) GN=xylB PE=1 SV=1 - [XYLB_ECOLI]	2.57345	0.88949	0.294799	0.866281	0.638684	0.632966
P37387	xylF	D-xylose-binding periplasmic protein OS=Escherichia coli (strain K12) GN=xylF PE=1 SV=1 - [XYLF_ECOLI]		1.50455	0.674877	2.20157	0.909249	1.05919
P0ACI3	xylR	Xylose operon regulatory protein OS=Escherichia coli (strain K12) GN=xylR PE=4 SV=1 - [XYLR_ECOLI]	1.69373	0.907925	0.326589	1.03204	1.15376	0.688501	0.330827	1.54845	1.45961	1.57877	0.699848
P0A8I3	yaaA	UPF0246 protein YaaA OS=Escherichia coli (strain K12) GN=yaaA PE=1 SV=1 - [YAAA_ECOLI]	2.3852	0.887021	0.413125	1.15053	0.864002	0.686972
P28696	yaaI	UPF0412 protein YaaI OS=Escherichia coli (strain K12) GN=yaaI PE=3 SV=1 - [YAAI_ECOLI]		1.09149	0.610687	0.977491	0.412511	0.665134
P39220	yabP	Putative uncharacterized protein YabP OS=Escherichia coli (strain K12) GN=yabP PE=5 SV=2 - [YABP_ECOLI]							0.918346	2.79669	2.48545	3.12683	0.91776
P0AA95	yacC	Uncharacterized protein YacC OS=Escherichia coli (strain K12) GN=yacC PE=4 SV=1 - [YACC_ECOLI]	2.61089	0.926059	0.745811	1.1671	0.430055	0.918248
P0A8H8	yacG	DNA gyrase inhibitor YacG OS=Escherichia coli (strain K12) GN=yacG PE=1 SV=1 - [YACG_ECOLI]	1.34407
P0A8E5	yacL	UPF0231 protein YacL OS=Escherichia coli (strain K12) GN=yacL PE=3 SV=1 - [YACL_ECOLI]	1.55852						0.303304	1.14933	1.09185	1.06271	0.927328
P36879	yadG	Uncharacterized ABC transporter ATP-binding protein YadG OS=Escherichia coli (strain K12) GN=yadG PE=3 SV=1 - [YADG_ECOLI]	1.76812	0.817831	0.751486	0.99679	1.05081	0.797594
P37056	yaeF	Probable endopeptidase YaeF OS=Escherichia coli (strain K12) GN=yaeF PE=4 SV=3 - [YAEF_ECOLI]		9.22295	4.29056	13.3166	10.206	5.75279
P62768	yaeH	UPF0325 protein YaeH OS=Escherichia coli (strain K12) GN=yaeH PE=3 SV=1 - [YAEH_ECOLI]	2.58825	1.14456	0.533788	1.39751	0.804231	0.827454	0.336767	1.84765	1.51016	1.80471	1.32364
P0A8K5	yaeP	UPF0253 protein YaeP OS=Escherichia coli (strain K12) GN=yaeP PE=1 SV=1 - [YAEP_ECOLI]	2.93603						1.06927	1.99798	1.18862	1.35985	1.27336
P0AA97	yaeQ	Uncharacterized protein YaeQ OS=Escherichia coli (strain K12) GN=yaeQ PE=1 SV=1 - [YAEQ_ECOLI]	1.64652	0.988923	0.572022	1.69645	1.22898	0.898376	0.603261	2.99501	2.70253	2.93373	1.23477
P52096	yaeR	Uncharacterized protein YaeR OS=Escherichia coli (strain K12) GN=yaeR PE=4 SV=1 - [YAER_ECOLI]	1.29548	1.25705	0.708331	1.24847	0.501728	0.897672
P30864	yafC	Uncharacterized HTH-type transcriptional regulator YafC OS=Escherichia coli (strain K12) GN=yafC PE=4 SV=1 - [YAFC_ECOLI]	1.50014	1.32428	0.772528	1.44221	0.833867	0.996508	0.349598	1.51784	1.24416	1.51391	1.00847
Q47147	yafJ	Putative glutamine amidotransferase YafJ OS=Escherichia coli (strain K12) GN=yafJ PE=4 SV=1 - [YAFJ_ECOLI]	1.34525	1.14425	0.712599	1.52281	0.811346	0.870713	0.807527	3.23407	3.04672	3.40251	0.496277
Q47156	yafN	Antitoxin YafN OS=Escherichia coli (strain K12) GN=yafN PE=1 SV=1 - [YAFN_ECOLI]	0.793358
Q47157	yafO	mRNA interferase YafO OS=Escherichia coli (strain K12) GN=yafO PE=1 SV=1 - [YAFO_ECOLI]							0.3985	0.988254	0.972692	1.00298	0.646192
Q47679	yafV	UPF0012 hydrolase YafV OS=Escherichia coli (strain K12) GN=yafV PE=3 SV=1 - [YAFV_ECOLI]	1.3356	0.432832	0.134841	0.740138	0.886774	0.451288
P75682	yagE	Probable 2-keto-3-deoxy-galactonate aldolase YagE OS=Escherichia coli (strain K12) GN=yagE PE=1 SV=2 - [YAGE_ECOLI]	0.842546
P77713	yagH	Putative beta-xylosidase OS=Escherichia coli (strain K12) GN=yagH PE=3 SV=1 - [YAGH_ECOLI]	1.19912	1.02199	0.467971	1.20333	0.673024	0.628919
P77300	yagI	Uncharacterized HTH-type transcriptional regulator YagI OS=Escherichia coli (strain K12) GN=yagI PE=4 SV=1 - [YAGI_ECOLI]	1.69409	0.868981	1.33057	1.49635	1.17213	1.19093	0.412599	1.62946	1.48675	1.71311	1.06197
P77657	yagK	Uncharacterized protein YagK OS=Escherichia coli (strain K12) GN=yagK PE=4 SV=1 - [YAGK_ECOLI]	1.39696
P0AAA1	yagU	Inner membrane protein YagU OS=Escherichia coli (strain K12) GN=yagU PE=1 SV=1 - [YAGU_ECOLI]	1.16589	0.518992		0.468556	0.535163	0.432126
P77263	yagV	Uncharacterized protein YagV OS=Escherichia coli (strain K12) GN=yagV PE=3 SV=2 - [YAGV_ECOLI]	0.880355
P21514	yahA	Cyclic di-GMP phosphodiesterase YahA OS=Escherichia coli (strain K12) GN=yahA PE=1 SV=2 - [YAHA_ECOLI]	1.76924	0.74829	0.226055	0.964361	0.75457	0.346757
P77736	yahD	Putative ankyrin repeat protein YahD OS=Escherichia coli (strain K12) GN=yahD PE=4 SV=1 - [YAHD_ECOLI]							0.612362	2.01979	1.92166	1.80985	0.964069
P77554	yahJ	Uncharacterized protein YahJ OS=Escherichia coli (strain K12) GN=yahJ PE=4 SV=1 - [YAHJ_ECOLI]	1.73384	0.840337	0.530113	1.09713	0.705223	0.779826	0.429697	1.81685	1.48856	1.56392	0.895869
P75691	yahK	Uncharacterized zinc-type alcohol dehydrogenase-like protein YahK OS=Escherichia coli (strain K12) GN=yahK PE=1 SV=1 - [YAHK_ECOLI]	1.77662	0.833632	0.38693	0.955322	0.802795	0.587721	0.303748	1.02805	0.832316	0.886172	0.796927
P75692	yahM	Uncharacterized protein YahM OS=Escherichia coli (strain K12) GN=yahM PE=4 SV=2 - [YAHM_ECOLI]		15.8104	4.86265	2.07635	8.83149	22.4587
P75694	yahO	Uncharacterized protein YahO OS=Escherichia coli (strain K12) GN=yahO PE=3 SV=1 - [YAHO_ECOLI]	1.03021	0.991913	0.35198	0.708551	0.609636	0.634497	0.15259	0.773924	0.583518	0.849529	1.57285
P0AAN5	yaiA	Uncharacterized protein YaiA OS=Escherichia coli (strain K12) GN=yaiA PE=1 SV=1 - [YAIA_ECOLI]	1.68465
P0C037	yaiE	UPF0345 protein YaiE OS=Escherichia coli (strain K12) GN=yaiE PE=3 SV=1 - [YAIE_ECOLI]	1.52817	0.807164	0.512464	0.729758	0.259852	0.7785
P0A8D3	yaiI	UPF0178 protein YaiI OS=Escherichia coli (strain K12) GN=yaiI PE=1 SV=1 - [YAII_ECOLI]	2.01262	0.962196	0.595442	1.40861	0.617086	0.963863	0.380099	1.68724	1.73186	1.77239	1.49368
P51024	yaiL	Uncharacterized protein YaiL OS=Escherichia coli (strain K12) GN=yaiL PE=4 SV=2 - [YAIL_ECOLI]	0.990672	1.13606	0.864434	1.18173	0.511181	0.96418	0.319983	1.75058	1.5197	1.74937	1.03337
P77562	yaiW	Uncharacterized protein YaiW OS=Escherichia coli (strain K12) GN=yaiW PE=4 SV=1 - [YAIW_ECOLI]	1.16135	0.935216	0.587171	1.02657	0.598076	0.767679
P0AAQ0	yaiZ	Uncharacterized protein YaiZ OS=Escherichia coli (strain K12) GN=yaiZ PE=4 SV=1 - [YAIZ_ECOLI]	1.51525
P0ADZ7	yajC	UPF0092 membrane protein YajC OS=Escherichia coli (strain K12) GN=yajC PE=1 SV=1 - [YAJC_ECOLI]	1.16432	0.771543	0.468971	0.838682	0.410128	0.631564	0.606763	1.39396	1.44182	1.31924	0.712265
P0AAQ2	yajD	Uncharacterized protein YajD OS=Escherichia coli (strain K12) GN=yajD PE=4 SV=1 - [YAJD_ECOLI]	1.54851	0.963919	0.762422	1.36837	0.512978	1.09584
P0ADA5	yajG	Uncharacterized lipoprotein YajG OS=Escherichia coli (strain K12) GN=yajG PE=4 SV=1 - [YAJG_ECOLI]	0.789214	0.659808	0.448999	0.869981	0.554404	0.813583	0.360649	1.36012	1.38418	1.38433	1.25601
P46122	yajI	Uncharacterized lipoprotein YajI OS=Escherichia coli (strain K12) GN=yajI PE=1 SV=3 - [YAJI_ECOLI]	1.26094	0.563103	0.373816	0.814489	0.547451	0.670466
Q46948	yajL	Chaperone protein YajL OS=Escherichia coli (strain K12) GN=yajL PE=1 SV=2 - [YAJL_ECOLI]	1.3749	0.880196	0.494709	1.05856	0.671833	0.784217	0.332743	1.08737	1.08413	1.11235	0.885307
P77735	yajO	Uncharacterized oxidoreductase YajO OS=Escherichia coli (strain K12) GN=yajO PE=3 SV=2 - [YAJO_ECOLI]	1.75421	0.927938	0.381843	1.01706	0.755109	0.812081	0.518561	1.55681	1.52515	1.27591	0.931888
P0A8E7	yajQ	UPF0234 protein YajQ OS=Escherichia coli (strain K12) GN=yajQ PE=1 SV=2 - [YAJQ_ECOLI]	1.37744	1.01608	0.561626	1.33231	0.796739	0.652049	0.47099	2.74213	2.13017	2.94822	0.895417
P0AAQ6	ybaA	Uncharacterized protein YbaA OS=Escherichia coli (strain K12) GN=ybaA PE=4 SV=1 - [YBAA_ECOLI]	2.24349	0.998228	0.971045	1.67604	0.95347	1.06923
P0A8B5	ybaB	Nucleoid-associated protein YbaB OS=Escherichia coli (strain K12) GN=ybaB PE=1 SV=1 - [YBAB_ECOLI]	1.58694	1.31424	0.95074	1.31011	0.467786	0.77393	0.365583	1.51844	1.32052	1.39861	0.992622
P0AAR3	ybaK	Cys-tRNA(Pro)/Cys-tRNA(Cys) deacylase YbaK OS=Escherichia coli (strain K12) GN=ybaK PE=1 SV=1 - [YBAK_ECOLI]	0.992945	0.703409	0.462888	1.00969	0.508035	0.742714	0.300783	2.17576	1.75028	2.22893	1.15831
P45807	ybaM	Uncharacterized protein YbaM OS=Escherichia coli (strain K12) GN=ybaM PE=4 SV=1 - [YBAM_ECOLI]	1.30351	3.02499	0.926165	2.22542		1.36637
P0ACJ5	ybaO	Uncharacterized HTH-type transcriptional regulator YbaO OS=Escherichia coli (strain K12) GN=ybaO PE=4 SV=1 - [YBAO_ECOLI]		0.91953	0.669291	1.24884	1.05954	0.913514
P77301	ybaP	Uncharacterized protein YbaP OS=Escherichia coli (strain K12) GN=ybaP PE=4 SV=1 - [YBAP_ECOLI]		0.914356	0.521726	1.344	1.25361	0.870503
P0A9T6	ybaQ	Uncharacterized HTH-type transcriptional regulator YbaQ OS=Escherichia coli (strain K12) GN=ybaQ PE=1 SV=1 - [YBAQ_ECOLI]	1.10276	0.994687	0.864134	1.00428	0.346427	0.717478
P0AAR8	ybaV	Uncharacterized protein YbaV OS=Escherichia coli (strain K12) GN=ybaV PE=4 SV=1 - [YBAV_ECOLI]		3.60461	1.3625	8.26914	4.02499	2.39246
P77717	ybaY	Uncharacterized lipoprotein YbaY OS=Escherichia coli (strain K12) GN=ybaY PE=4 SV=1 - [YBAY_ECOLI]	1.54117	0.664509	0.21192	0.653226	0.533498	0.37092
P0A9T8	ybbA	Uncharacterized ABC transporter ATP-binding protein YbbA OS=Escherichia coli (strain K12) GN=ybbA PE=3 SV=1 - [YBBA_ECOLI]	1.57069	0.733447	0.40237	0.904275	0.642426	0.652257
P0AAS3	ybbJ	Inner membrane protein YbbJ OS=Escherichia coli (strain K12) GN=ybbJ PE=1 SV=2 - [YBBJ_ECOLI]	1.25229
P77279	ybbL	Uncharacterized ABC transporter ATP-binding protein YbbL OS=Escherichia coli (strain K12) GN=ybbL PE=1 SV=1 - [YBBL_ECOLI]	0.977608	0.570065	0.355369	0.587488	0.417872	0.670338	0.417193	1.28847	1.32963	1.22709	0.920057
P77395	ybbN	Uncharacterized protein YbbN OS=Escherichia coli (strain K12) GN=ybbN PE=1 SV=2 - [YBBN_ECOLI]	1.20174	1.31075	0.63675	1.10739	0.414101	0.55768	0.466255	2.2911	0.70142	1.83464	0.986221
P0AFP4	ybbO	Uncharacterized oxidoreductase YbbO OS=Escherichia coli (strain K12) GN=ybbO PE=3 SV=1 - [YBBO_ECOLI]	0.877851	1.0846	0.586257	1.0737	0.763293	0.852882
P37325	ybcH	Uncharacterized protein YbcH OS=Escherichia coli (strain K12) GN=ybcH PE=4 SV=2 - [YBCH_ECOLI]	0.974932	0.650266	0.338381	0.885113	0.754919	0.505631
P0AAS7	ybcJ	Uncharacterized protein YbcJ OS=Escherichia coli (strain K12) GN=ybcJ PE=1 SV=1 - [YBCJ_ECOLI]	1.33705	0.765072	0.479744	1.25915	0.650439	0.722783	0.3004	1.9919	1.83316	1.68096	1.17903
P0AAT2	ybdF	Uncharacterized protein YbdF OS=Escherichia coli (strain K12) GN=ybdF PE=4 SV=1 - [YBDF_ECOLI]		0.86501	0.4496	0.774583	0.492628	0.568343
P0AAT4	ybdG	Miniconductance mechanosensitive channel OS=Escherichia coli (strain K12) GN=mscM PE=1 SV=1 - [MSCM_ECOLI]	1.23086
P77213	ybdK	Carboxylate-amine ligase YbdK OS=Escherichia coli (strain K12) GN=ybdK PE=1 SV=1 - [CAAL_ECOLI]	1.41673	0.445173	0.285885	0.775084	0.568668	0.619061	0.386724	1.27203	1.09687	1.03077	0.890622
P77806	ybdL	Methionine aminotransferase OS=Escherichia coli (strain K12) GN=ybdL PE=1 SV=1 - [YBDL_ECOLI]	1.37307						0.234926	1.54303	0.644532	1.08836	1.09955
P77174	ybdM	Uncharacterized protein YbdM OS=Escherichia coli (strain K12) GN=ybdM PE=4 SV=1 - [YBDM_ECOLI]	2.03185
P0A8J4	ybeD	UPF0250 protein YbeD OS=Escherichia coli (strain K12) GN=ybeD PE=1 SV=1 - [YBED_ECOLI]	1.74178	0.76537	0.529931	1.16882	0.756458	0.701553
P0AAT9	ybeL	Uncharacterized protein YbeL OS=Escherichia coli (strain K12) GN=ybeL PE=4 SV=1 - [YBEL_ECOLI]	1.85844	1.01778	0.482175	0.612457	0.34746	0.534576	0.350332	1.99708	1.14463	1.46319	0.642944
P77234	ybeQ	Uncharacterized protein YbeQ OS=Escherichia coli (strain K12) GN=ybeQ PE=4 SV=2 - [YBEQ_ECOLI]	0.992713
P0A898	ybeY	Probable rRNA maturation factor YbeY OS=Escherichia coli (strain K12) GN=ybeY PE=1 SV=1 - [RRMF_ECOLI]	1.0998	1.08252	0.809751	1.08931	0.390698	0.759103
P0A9K3	ybeZ	PhoH-like protein OS=Escherichia coli (strain K12) GN=ybeZ PE=1 SV=2 - [PHOL_ECOLI]	1.0229	0.79601	0.488911	0.742569	0.26099	0.83204	0.69473	3.46033	2.37299	3.24415	0.733636
P0AAU2	ybfA	Uncharacterized protein YbfA OS=Escherichia coli (strain K12) GN=ybfA PE=4 SV=1 - [YBFA_ECOLI]	1.38039						0.355356	1.09889	0.666456	0.924345	1.16651
P0AAU7	ybfE	Uncharacterized protein YbfE OS=Escherichia coli (strain K12) GN=ybfE PE=4 SV=2 - [YBFE_ECOLI]	1.17447	1.013	0.707531	1.14041	0.694899	0.905921
P75736	ybfF	Esterase YbfF OS=Escherichia coli (strain K12) GN=ybfF PE=1 SV=1 - [YBFF_ECOLI]	1.71933	0.66472	0.39323	0.841231	0.588136	0.670196	0.402913	1.5464	1.40401	1.36463	0.811089
Q2EEQ8	ybfQ	Putative defective transposase YbfQ OS=Escherichia coli (strain K12) GN=ybfQ PE=5 SV=1 - [YBFQ_ECOLI]	2.18328
P0A8Z3	ybgC	Acyl-CoA thioester hydrolase YbgC OS=Escherichia coli (strain K12) GN=ybgC PE=1 SV=1 - [YBGC_ECOLI]	1.14442	0.784355	0.453575	1.16674	0.710364	0.691276
P45955	ybgF	Uncharacterized protein YbgF OS=Escherichia coli (strain K12) GN=ybgF PE=1 SV=2 - [YBGF_ECOLI]	1.54753	1.02123	0.584805	1.3758	0.755705	0.805322	0.507844	3.32523	2.97036	3.20284	1.14582
P0AFP6	ybgI	UPF0135 protein YbgI OS=Escherichia coli (strain K12) GN=ybgI PE=1 SV=1 - [YBGI_ECOLI]	0.705402	0.874726	0.580272	0.499649	0.238622	0.913564	0.41532	2.45652	1.534	1.69447	0.997896
P0AAV4	ybgJ	Uncharacterized protein YbgJ OS=Escherichia coli (strain K12) GN=ybgJ PE=4 SV=1 - [YBGJ_ECOLI]	1.39317
P75745	ybgK	Uncharacterized protein YbgK OS=Escherichia coli (strain K12) GN=ybgK PE=4 SV=1 - [YBGK_ECOLI]	1.33608	0.651272	0.447687	0.771527	0.662006	0.548501	0.297114	1.29827	0.981253	1.00996	0.58846
P75746	ybgL	UPF0271 protein YbgL OS=Escherichia coli (strain K12) GN=ybgL PE=1 SV=1 - [YBGL_ECOLI]	1.53013	0.764635	0.548222	1.03012	0.50116	0.879406
P0AAV6	ybgS	Uncharacterized protein YbgS OS=Escherichia coli (strain K12) GN=ybgS PE=4 SV=1 - [YBGS_ECOLI]	2.19372
P21829	ybhA	Pyridoxal phosphate phosphatase YbhA OS=Escherichia coli (strain K12) GN=ybhA PE=1 SV=3 - [YBHA_ECOLI]	1.86436	0.460399	0.388653	1.3479	0.850435	0.669996
P12994	ybhB	UPF0098 protein YbhB OS=Escherichia coli (strain K12) GN=ybhB PE=1 SV=2 - [YBHB_ECOLI]	2.24226	1.05279	0.319518	1.36642	1.05168	0.533249	0.207237	0.418919	0.450232	0.342142	0.508642
P46130	ybhC	Putative acyl-CoA thioester hydrolase YbhC OS=Escherichia coli (strain K12) GN=ybhC PE=1 SV=2 - [YBHC_ECOLI]	1.25929	0.779957	0.389617	1.08898	0.916077	0.62533	0.283628	1.34549	1.29041	1.19425	0.645392
P52696	ybhD	Uncharacterized HTH-type transcriptional regulator YbhD OS=Escherichia coli (strain K12) GN=ybhD PE=4 SV=3 - [YBHD_ECOLI]				1.70895	0.963985
P75777	ybhG	UPF0194 membrane protein YbhG OS=Escherichia coli (strain K12) GN=ybhG PE=3 SV=1 - [YBHG_ECOLI]	1.14277						0.309571	1.64124	0.892664	1.22026	0.747886
P75764	ybhJ	Uncharacterized protein YbhJ OS=Escherichia coli (strain K12) GN=ybhJ PE=3 SV=2 - [YBHJ_ECOLI]		0.843317	0.348874	1.14468	0.649235	0.640475
P75767	ybhK	UPF0052 protein YbhK OS=Escherichia coli (strain K12) GN=ybhK PE=3 SV=1 - [YBHK_ECOLI]	1.22259	0.738295	0.479228	0.961834	0.668653	0.712717
P0AAW1	ybhP	Uncharacterized protein YbhP OS=Escherichia coli (strain K12) GN=ybhP PE=4 SV=1 - [YBHP_ECOLI]		1.08421	0.432246	0.878236	0.631054	0.573055
P0AAW9	ybhT	Uncharacterized membrane protein YbhT OS=Escherichia coli (strain K12) GN=ybhT PE=1 SV=1 - [YBHT_ECOLI]	1.45559
P30177	ybiB	Uncharacterized protein YbiB OS=Escherichia coli (strain K12) GN=ybiB PE=1 SV=1 - [YBIB_ECOLI]	1.41163	1.04124	0.490344	1.27288	0.780836	0.833731	0.298863	1.32536	1.0305	1.24907	0.854068
P30178	ybiC	Uncharacterized oxidoreductase YbiC OS=Escherichia coli (strain K12) GN=ybiC PE=1 SV=2 - [YBIC_ECOLI]	1.05329	1.41591	0.777618	1.87909	1.99945	1.77151	0.444622	1.3759	1.14442	1.24062	0.955859
P0AAX8	ybiS	Probable L,D-transpeptidase YbiS OS=Escherichia coli (strain K12) GN=ybiS PE=1 SV=1 - [YBIS_ECOLI]	1.98693	0.844085	0.522537	1.23349	0.809816	0.625953	0.888064	3.00019	2.9007	2.67864	1.23341
P0A9U3	ybiT	Uncharacterized ABC transporter ATP-binding protein YbiT OS=Escherichia coli (strain K12) GN=ybiT PE=3 SV=1 - [YBIT_ECOLI]	0.841711	0.685686	0.527021	0.798055	0.396146	0.799447	0.410501	1.50597	1.40939	1.59279	1.12191
P75791	ybiU	Uncharacterized protein YbiU OS=Escherichia coli (strain K12) GN=ybiU PE=1 SV=1 - [YBIU_ECOLI]	2.06414	0.657904	0.254209	0.70881	0.575796	0.441554	0.393106	1.12657	1.59261	1.38039	0.444284
P75792	ybiV	Sugar phosphatase YbiV OS=Escherichia coli (strain K12) GN=ybiV PE=1 SV=1 - [SUPH_ECOLI]	1.81177	0.835034	0.465509	1.25562	0.772033	0.628687	0.369924	1.41241	1.73634	1.78641	0.504593
P75779	ybiX	PKHD-type hydroxylase YbiX OS=Escherichia coli (strain K12) GN=ybiX PE=3 SV=2 - [YBIX_ECOLI]	0.335049	0.201038	0.124362	0.242786	0.139232	0.138429
P75809	ybjI	Flavine mononucleotide phosphatase YbjI OS=Escherichia coli (strain K12) GN=ybjI PE=1 SV=3 - [YBJI_ECOLI]	1.47823	0.892285	0.598584	1.16759	0.659128	0.943138	0.869111	2.44516	2.4289	2.48677	1.22646
P75810	ybjJ	Inner membrane protein YbjJ OS=Escherichia coli (strain K12) GN=ybjJ PE=1 SV=1 - [YBJJ_ECOLI]	1.02294
P0AAY6	ybjN	Uncharacterized protein YbjN OS=Escherichia coli (strain K12) GN=ybjN PE=4 SV=1 - [YBJN_ECOLI]	0.899204
P75818	ybjP	Uncharacterized lipoprotein YbjP OS=Escherichia coli (strain K12) GN=ybjP PE=1 SV=1 - [YBJP_ECOLI]	1.5363	1.09372	0.333727	0.908097	0.526112	0.631273	0.276984	0.955189	0.710078	0.743542	0.568679
P0A8C1	ybjQ	UPF0145 protein YbjQ OS=Escherichia coli (strain K12) GN=ybjQ PE=1 SV=1 - [YBJQ_ECOLI]	0.821885
P75821	ybjS	Uncharacterized protein YbjS OS=Escherichia coli (strain K12) GN=ybjS PE=4 SV=2 - [YBJS_ECOLI]	2.20063	1.0468	0.55157	1.19753	0.73302	0.742173	1.20283	3.84807	3.53701	3.54399	1.16286
P75829	ybjX	Uncharacterized protein YbjX OS=Escherichia coli (strain K12) GN=ybjX PE=4 SV=1 - [YBJX_ECOLI]		0.933087	0.953728	0.733763	0.505577	0.856198
P21367	ycaC	Uncharacterized protein YcaC OS=Escherichia coli (strain K12) GN=ycaC PE=1 SV=1 - [YCAC_ECOLI]	2.00753	0.939223	0.404358	1.11463	1.05219	0.646639
P43340	ycaK	Uncharacterized NAD(P)H oxidoreductase YcaK OS=Escherichia coli (strain K12) GN=ycaK PE=3 SV=2 - [YCAK_ECOLI]		0.7515	0.646213	0.73095	0.392102	0.614883	0.370666	1.31822	1.37763	1.29551	0.739335
P75835	ycaM	Inner membrane transporter YcaM OS=Escherichia coli (strain K12) GN=ycaM PE=1 SV=2 - [YCAM_ECOLI]	1.51964
P75836	ycaN	Uncharacterized HTH-type transcriptional regulator YcaN OS=Escherichia coli (strain K12) GN=ycaN PE=4 SV=1 - [YCAN_ECOLI]	2.15621
P75838	ycaO	Ribosomal protein S12 methylthiotransferase accessory factor YcaO OS=Escherichia coli (strain K12) GN=ycaO PE=1 SV=2 - [YCAO_ECOLI]	0.686893	0.863793	0.657309	0.862398	0.491262	0.866938
P0AAZ7	ycaR	UPF0434 protein YcaR OS=Escherichia coli (strain K12) GN=ycaR PE=1 SV=1 - [YCAR_ECOLI]	1.99798	4.19773	1.8827	3.37087	1.51996	2.25116	1.0039	3.91234	2.0675	4.55532	1.15238
P22525	ycbB	Probable L,D-transpeptidase YcbB OS=Escherichia coli (strain K12) GN=ycbB PE=3 SV=2 - [YCBB_ECOLI]		0.839425	0.395628	0.718843	0.486701	0.807172
P75849	ycbL	Uncharacterized protein YcbL OS=Escherichia coli (strain K12) GN=ycbL PE=3 SV=1 - [YCBL_ECOLI]	1.5245	1.01237	0.571526	1.15033	0.489073	0.732574	0.498251	1.53719	1.17807	1.51712	1.00015
P75863	ycbX	Uncharacterized protein YcbX OS=Escherichia coli (strain K12) GN=ycbX PE=1 SV=1 - [YCBX_ECOLI]		0.375695	0.181865	0.457689	0.399484	0.63339
P0AAC6	yccA	Modulator of FtsH protease YccA OS=Escherichia coli (strain K12) GN=yccA PE=1 SV=1 - [YCCA_ECOLI]		0.705962	0.48094	0.723116	0.346072	0.691319
P0AB12	yccF	Inner membrane protein YccF OS=Escherichia coli (strain K12) GN=yccF PE=1 SV=1 - [YCCF_ECOLI]	1.28638
P0AB14	yccJ	Uncharacterized protein YccJ OS=Escherichia coli (strain K12) GN=yccJ PE=1 SV=1 - [YCCJ_ECOLI]	2.46942						0.230839	1.43795	0.993026	1.30634	1.10123
P75870	yccS	Inner membrane protein YccS OS=Escherichia coli (strain K12) GN=yccS PE=1 SV=2 - [YCCS_ECOLI]	1.2251
P75874	yccU	Uncharacterized protein YccU OS=Escherichia coli (strain K12) GN=yccU PE=1 SV=2 - [YCCU_ECOLI]	1.46256	1.03137	0.449646	1.45903	0.971051	0.957739	0.409065	1.21771	1.17802	1.0568	0.981441
P0AB65	yccX	Acylphosphatase OS=Escherichia coli (strain K12) GN=yccX PE=1 SV=1 - [ACYP_ECOLI]		1.16539	0.494182	0.968757	0.554261	0.727921
P75914	ycdX	Probable phosphatase YcdX OS=Escherichia coli (strain K12) GN=ycdX PE=1 SV=1 - [YCDX_ECOLI]	1.22901	0.907631	0.608307	1.23313	0.553733	0.883704	0.467768	1.7994	1.70302	2.71532	0.853773
P75915	ycdY	Chaperone protein YcdY OS=Escherichia coli (strain K12) GN=ycdY PE=1 SV=1 - [YCDY_ECOLI]	1.21295	0.807171	0.526141	0.959618	0.460077	0.820256
P24188	yceA	UPF0176 protein YceA OS=Escherichia coli (strain K12) GN=yceA PE=2 SV=2 - [YCEA_ECOLI]	0.942648	0.32784	0.830214	1.5334	1.14919	0.518417	0.307026	2.01691	1.42615	1.89375	0.763142
P0AB26	yceB	Uncharacterized lipoprotein YceB OS=Escherichia coli (strain K12) GN=yceB PE=1 SV=1 - [YCEB_ECOLI]	1.19394	2.59045	1.47496	2.25887	0.705666	0.580547	0.42629	0.936691	0.954326	1.01466	0.63954
P0AB28	yceD	Uncharacterized protein YceD OS=Escherichia coli (strain K12) GN=yceD PE=4 SV=1 - [YCED_ECOLI]	1.0401	0.890159	0.684133	1.01145	0.366946	0.738477	0.320684	1.467	1.50583	1.58557	1.27838
P0A729	yceF	Maf-like protein YceF OS=Escherichia coli (strain K12) GN=yceF PE=3 SV=1 - [YCEF_ECOLI]	1.73809	0.818952	0.478082	1.077	0.812235	0.676127
P28306	yceG	UPF0755 protein YceG OS=Escherichia coli (strain K12) GN=yceG PE=1 SV=2 - [YCEG_ECOLI]	1.04752	0.759301	0.47984	0.935195	0.692462	0.638687
P29217	yceH	UPF0502 protein YceH OS=Escherichia coli (strain K12) GN=yceH PE=1 SV=3 - [YCEH_ECOLI]	0.970771	0.59665	0.247864	0.676136	0.474796	0.419214	0.529753	1.93962	1.31213	1.98832	1.19654
P0A8X2	yceI	Protein YceI OS=Escherichia coli (strain K12) GN=yceI PE=1 SV=1 - [YCEI_ECOLI]	1.07984	1.28948	0.695339	1.31085	0.564941	0.821061	0.175826	0.967992	1.05451	0.975111	0.880278
P75931	yceM	Putative oxidoreductase YceM OS=Escherichia coli (strain K12) GN=yceM PE=1 SV=1 - [YCEM_ECOLI]		1.27288	0.529006	1.64365	0.743353	0.961907
P27431	ycfD	50S ribosomal protein L16 arginine hydroxylase OS=Escherichia coli (strain K12) GN=ycfD PE=1 SV=2 - [YCFD_ECOLI]	1.28835	0.962119	0.577727	1.2256	0.606047	0.809171	0.480466	1.41383	1.37681	1.38441	0.874576
P0AFQ7	ycfH	Uncharacterized deoxyribonuclease YcfH OS=Escherichia coli (strain K12) GN=ycfH PE=1 SV=1 - [YCFH_ECOLI]	1.2454	0.80068	0.548806	0.931441	0.707532	0.906791	0.611956	2.56251	2.61984	2.82012	1.12855
P0A8E1	ycfP	UPF0227 protein YcfP OS=Escherichia coli (strain K12) GN=ycfP PE=3 SV=1 - [YCFP_ECOLI]	1.40024	0.838543	0.533791	1.03547	0.735063	0.848059	0.369632	1.31233	1.113	1.39397	0.796914
P75954	ycfS	Probable L,D-transpeptidase YcfS OS=Escherichia coli (strain K12) GN=ycfS PE=1 SV=1 - [YCFS_ECOLI]	1.16606
P29013	ycgB	Uncharacterized protein YcgB OS=Escherichia coli (strain K12) GN=ycgB PE=4 SV=2 - [YCGB_ECOLI]	1.73662						0.569663	1.06989	0.962986	0.822742	0.983668
P75989	ycgE	HTH-type transcriptional repressor YcgE OS=Escherichia coli (strain K12) GN=ycgE PE=1 SV=1 - [YCGE_ECOLI]		0.736777	0.517671	0.793847	0.568507	0.693434
P76001	ycgJ	Uncharacterized protein YcgJ OS=Escherichia coli (strain K12) GN=ycgJ PE=4 SV=1 - [YCGJ_ECOLI]	1.45115	1.62814	0.903454	1.62828	0.595654	0.846385
P0AB43	ycgL	Protein YcgL OS=Escherichia coli (strain K12) GN=ycgL PE=1 SV=2 - [YCGL_ECOLI]	1.67354	0.99822	0.652514	1.28652	0.702174	0.893272	0.373976	1.54701	2.25098	1.92438	0.989823
P76004	ycgM	Uncharacterized protein YcgM OS=Escherichia coli (strain K12) GN=ycgM PE=1 SV=1 - [YCGM_ECOLI]	2.19436	1.8111	1.00702	1.78431	1.14573	1.6747	0.53422	1.0955	0.873761	1.09666	0.972092
P0A8L5	ycgN	UPF0260 protein YcgN OS=Escherichia coli (strain K12) GN=ycgN PE=3 SV=1 - [YCGN_ECOLI]	1.17683	0.159088	0.123135	0.127511	0.0886243	0.24918
P76010	ycgR	Flagellar brake protein YcgR OS=Escherichia coli (strain K12) GN=ycgR PE=1 SV=1 - [YCGR_ECOLI]	0.33402	0.485427	0.277388	0.255327	0.119	0.614453
P0ABU2	ychF	GTP-dependent nucleic acid-binding protein EngD OS=Escherichia coli (strain K12) GN=engD PE=1 SV=2 - [ENGD_ECOLI]	1.69856	0.811449	0.491931	1.25831	0.747806	0.706372	0.475291	1.96695	1.84691	1.98417	0.977419
P0AB49	ychH	Uncharacterized protein YchH OS=Escherichia coli (strain K12) GN=ychH PE=4 SV=1 - [YCHH_ECOLI]	0.897297	0.417753	0.198358	0.405441	0.540471	0.260817
P37052	ychJ	UPF0225 protein YchJ OS=Escherichia coli (strain K12) GN=ychJ PE=1 SV=2 - [YCHJ_ECOLI]	0.639796	0.896323	0.552361	1.22648	0.679308	0.849563
P0AB52	ychN	Protein YchN OS=Escherichia coli (strain K12) GN=ychN PE=1 SV=1 - [YCHN_ECOLI]	0.917304	0.903967	0.503989	1.13618	0.582457	0.645601	0.272584	1.27987	1.26285	1.34937	0.786532
P0A8Z0	yciA	Acyl-CoA thioester hydrolase YciA OS=Escherichia coli (strain K12) GN=yciA PE=3 SV=1 - [YCIA_ECOLI]	0.861017						0.384206	1.36281	1.16511	1.47103	0.75838
P0A710	yciB	Probable intracellular septation protein A OS=Escherichia coli (strain K12) GN=yciB PE=1 SV=1 - [YCIB_ECOLI]	1.06472	1.05855	0.850991	1.68596	0.925165	1.03872
P21365	yciC	UPF0259 membrane protein YciC OS=Escherichia coli (strain K12) GN=yciC PE=1 SV=2 - [YCIC_ECOLI]	1.11225	1.61074	0.664442	1.84407	1.07868	0.865632
P21363	yciE	Protein YciE OS=Escherichia coli (strain K12) GN=yciE PE=1 SV=1 - [YCIE_ECOLI]	2.08082	1.15038	0.728722	1.4034	0.692894	0.708463	0.362586	0.57641	0.336962	0.503479	0.425453
P21362	yciF	Protein YciF OS=Escherichia coli (strain K12) GN=yciF PE=1 SV=1 - [YCIF_ECOLI]	2.26427	1.04855	0.538243	1.49223	0.899024	0.495813
P08245	yciH	Uncharacterized protein YciH OS=Escherichia coli (strain K12) GN=yciH PE=1 SV=1 - [YCIH_ECOLI]	0.975566	0.993988	0.928393	1.20903	0.619532	1.06526
P0AB55	yciI	Protein YciI OS=Escherichia coli (strain K12) GN=yciI PE=1 SV=1 - [YCII_ECOLI]	2.15702	0.913842	0.508106	0.931051	0.42776	0.644725	0.109434	0.655563	0.977482	0.418637	1.04038
P31808	yciK	Uncharacterized oxidoreductase YciK OS=Escherichia coli (strain K12) GN=yciK PE=1 SV=3 - [YCIK_ECOLI]	1.46112	0.739079	0.436765	0.94155	0.601958	0.701583
P0AB58	yciM	Uncharacterized protein YciM OS=Escherichia coli (strain K12) GN=yciM PE=4 SV=1 - [YCIM_ECOLI]	1.16676	0.826705	0.477996	0.856188	0.547699	0.584592	0.421479	1.3529	1.30917	1.06057	0.683807
P0AB61	yciN	Protein YciN OS=Escherichia coli (strain K12) GN=yciN PE=1 SV=1 - [YCIN_ECOLI]	1.40183	1.47484	0.780709	1.1445	0.220123	0.516862	0.463245	1.17679	0.736518	1.14712	0.671836
P0AFR4	yciO	Uncharacterized protein YciO OS=Escherichia coli (strain K12) GN=yciO PE=1 SV=1 - [YCIO_ECOLI]	1.88355	0.717372	0.483631	1.17608	0.990393	0.824858
P45848	yciQ	Uncharacterized protein YciQ OS=Escherichia coli (strain K12) GN=yciQ PE=4 SV=2 - [YCIQ_ECOLI]		0.924931	0.616125	1.11937	0.534113	0.849152
P76034	yciT	Uncharacterized HTH-type transcriptional regulator YciT OS=Escherichia coli (strain K12) GN=yciT PE=4 SV=1 - [YCIT_ECOLI]	0.727931	1.06554	0.684448	1.11617	0.523639	0.981884	1.4452	2.92691	2.60987	4.21632	0.948957
P0A8L7	yciU	UPF0263 protein YciU OS=Escherichia coli (strain K12) GN=yciU PE=1 SV=1 - [YCIU_ECOLI]		1.2984	1.44395	0.706215	0.55816	0.742268
P76035	yciW	Uncharacterized protein YciW OS=Escherichia coli (strain K12) GN=yciW PE=4 SV=2 - [YCIW_ECOLI]	2.08404
A5A614	yciZ	UPF0509 protein YciZ OS=Escherichia coli (strain K12) GN=yciZ PE=3 SV=1 - [YCIZ_ECOLI]	0.524987
P51981	ycjG	L-Ala-D/L-Glu epimerase OS=Escherichia coli (strain K12) GN=ycjG PE=1 SV=2 - [AEEP_ECOLI]	1.01032						0.367729	1.4149	1.16727	1.38767	0.973429
P76044	ycjR	Uncharacterized protein YcjR OS=Escherichia coli (strain K12) GN=ycjR PE=3 SV=2 - [YCJR_ECOLI]		0.916095	0.535847	0.803271	0.32223	0.990437
P76046	ycjX	Uncharacterized protein YcjX OS=Escherichia coli (strain K12) GN=ycjX PE=1 SV=1 - [YCJX_ECOLI]	1.01519	0.588263	0.489623	0.671714	0.721253	0.602157
P76049	ycjY	Uncharacterized protein YcjY OS=Escherichia coli (strain K12) GN=ycjY PE=4 SV=2 - [YCJY_ECOLI]	1.72427
P77333	ycjZ	Uncharacterized HTH-type transcriptional regulator YcjZ OS=Escherichia coli (strain K12) GN=ycjZ PE=4 SV=1 - [YCJZ_ECOLI]	1.10255
P25906	ydbC	Putative oxidoreductase YdbC OS=Escherichia coli (strain K12) GN=ydbC PE=1 SV=1 - [YDBC_ECOLI]	1.92988	0.922416	0.416524	1.22411	0.840019	0.809224	0.28655	0.870892	0.907618	0.782126	0.621135
P52645	ydbH	Uncharacterized protein YdbH OS=Escherichia coli (strain K12) GN=ydbH PE=4 SV=2 - [YDBH_ECOLI]	1.27032	0.76537	0.338925	0.931509	0.716918	0.566031	0.445365	1.50882	1.54844	1.52056	0.943501
P52647	ydbK	Probable pyruvate-flavodoxin oxidoreductase OS=Escherichia coli (strain K12) GN=ydbK PE=3 SV=2 - [NIFJ_ECOLI]	0.813821	0.777088	0.639473	1.0094	0.604959	0.98368
P76076	ydbL	Uncharacterized protein YdbL OS=Escherichia coli (strain K12) GN=ydbL PE=4 SV=2 - [YDBL_ECOLI]	1.71857	0.988304	0.490445	1.07426	0.614124	0.742552
P34209	ydcF	Protein YdcF OS=Escherichia coli (strain K12) GN=ydcF PE=1 SV=3 - [YDCF_ECOLI]	1.92892	0.806937	0.360894	0.944117	0.825032	0.51133	0.344314	1.49822	1.10942	1.29607	0.686668
P0ACW6	ydcH	Uncharacterized protein YdcH OS=Escherichia coli (strain K12) GN=ydcH PE=4 SV=2 - [YDCH_ECOLI]	1.55332
P76097	ydcJ	Uncharacterized protein YdcJ OS=Escherichia coli (strain K12) GN=ydcJ PE=4 SV=1 - [YDCJ_ECOLI]	2.29248
P76100	ydcK	Uncharacterized acetyltransferase YdcK OS=Escherichia coli (strain K12) GN=ydcK PE=3 SV=1 - [YDCK_ECOLI]	1.10318
P64451	ydcL	Uncharacterized lipoprotein YdcL OS=Escherichia coli (strain K12) GN=ydcL PE=4 SV=1 - [YDCL_ECOLI]	1.90221	0.945442	0.486257	1.07477	0.76455	0.725722	0.465587	1.03227	0.797542	0.989432	0.451251
P77626	ydcN	Uncharacterized HTH-type transcriptional regulator YdcN OS=Escherichia coli (strain K12) GN=ydcN PE=4 SV=1 - [YDCN_ECOLI]		0.729295	0.358021	0.960199	0.386553	0.421006	0.285863	0.71122	0.891259	0.370566	0.490716
P76104	ydcP	Uncharacterized protease YdcP OS=Escherichia coli (strain K12) GN=ydcP PE=3 SV=2 - [YDCP_ECOLI]		0.667531	0.553645	1.13967	0.569823	0.890122	0.410945	2.19095	2.43598	2.37872	1.07053
P76108	ydcS	Putative ABC transporter periplasmic-binding protein YdcS OS=Escherichia coli (strain K12) GN=ydcS PE=3 SV=1 - [YDCS_ECOLI]		1.10451	0.263067	0.803433	0.556631	0.538775
P64455	ydcY	Uncharacterized protein YdcY OS=Escherichia coli (strain K12) GN=ydcY PE=4 SV=1 - [YDCY_ECOLI]	0.826434	2.45882	1.77959	1.47149	0.53585	1.12985	0.37973	1.56134	1.1897	1.62247	1.47762
P31827	yddB	Uncharacterized protein YddB OS=Escherichia coli (strain K12) GN=yddB PE=4 SV=2 - [YDDB_ECOLI]							0.550172	1.10621	1.04358	1.13863	1.73684
P37757	yddE	Uncharacterized isomerase YddE OS=Escherichia coli (strain K12) GN=yddE PE=1 SV=2 - [YDDE_ECOLI]	1.90786	1.02256	0.656169	1.70745	1.05422	0.916614
P64426	yddW	UPF0748 lipoprotein YddW OS=Escherichia coli (strain K12) GN=yddW PE=3 SV=1 - [YDDW_ECOLI]	1.17246	0.784353	0.32517	0.995779	0.933381	0.526869
P31126	ydeE	Uncharacterized MFS-type transporter YdeE OS=Escherichia coli (strain K12) GN=ydeE PE=3 SV=2 - [YDEE_ECOLI]	0.899525
P31129	ydeH	Diguanylate cyclase YdeH OS=Escherichia coli (strain K12) GN=ydeH PE=1 SV=2 - [YDEH_ECOLI]	0.786328
P31130	ydeI	Uncharacterized protein YdeI OS=Escherichia coli (strain K12) GN=ydeI PE=4 SV=1 - [YDEI_ECOLI]	1.2327						0.395544	1.87495	1.13093	1.54003	1.16801
P39831	ydfG	NADP-dependent 3-hydroxy acid dehydrogenase YdfG OS=Escherichia coli (strain K12) GN=ydfG PE=1 SV=2 - [YDFG_ECOLI]	1.30772	0.936244	0.546329	1.10069	0.634671	0.901751	0.329746	1.63684	1.38336	1.64496	0.78
P0ACM2	ydfH	Uncharacterized HTH-type transcriptional regulator YdfH OS=Escherichia coli (strain K12) GN=ydfH PE=1 SV=1 - [YDFH_ECOLI]	1.0525
P64463	ydfZ	Putative selenoprotein YdfZ OS=Escherichia coli (strain K12) GN=ydfZ PE=1 SV=1 - [YDFZ_ECOLI]		1.02892	0.973474	0.454036	0.154369	1.21425	0.258137	1.965	0.801582	2.37023	1.24595
P77804	ydgA	Protein YdgA OS=Escherichia coli (strain K12) GN=ydgA PE=1 SV=1 - [YDGA_ECOLI]	0.988156	0.676829	0.398984	0.564391	0.347005	0.664122	0.360975	1.57334	1.24275	1.53534	1.00995
P76177	ydgH	Protein YdgH OS=Escherichia coli (strain K12) GN=ydgH PE=1 SV=1 - [YDGH_ECOLI]	1.57237	0.875578	0.504694	1.19466	0.640855	0.840029	0.394716	1.63362	1.53735	1.44353	0.869893
P77376	ydgJ	Uncharacterized oxidoreductase YdgJ OS=Escherichia coli (strain K12) GN=ydgJ PE=1 SV=2 - [YDGJ_ECOLI]	1.8705	0.860933	0.764285	1.93538	1.00819	1.16953	0.886586	3.46928	3.93605	3.71591	1.66457
P76187	ydhF	Oxidoreductase YdhF OS=Escherichia coli (strain K12) GN=ydhF PE=1 SV=2 - [YDHF_ECOLI]	1.29881	0.768761	0.429024	1.03499	0.748736	0.764277	0.493951	1.01899	1.28604	1.05422	0.912381
P76185	ydhJ	Uncharacterized protein YdhJ OS=Escherichia coli (strain K12) GN=ydhJ PE=3 SV=2 - [YDHJ_ECOLI]		1.6727	0.867192	1.55472	0.566628	0.855095
P77552	ydhQ	Uncharacterized protein YdhQ OS=Escherichia coli (strain K12) GN=ydhQ PE=4 SV=1 - [YDHQ_ECOLI]	0.762178	0.725892	0.443202	0.804214	0.449273	0.73659	0.18697	1.09621	1.06857	1.01672	0.712661
P0ACX3	ydhR	Putative monooxygenase YdhR OS=Escherichia coli (strain K12) GN=ydhR PE=1 SV=1 - [YDHR_ECOLI]	1.45864	1.45419	0.573114	1.29744	0.362452	0.735347	0.593161	1.14193	0.554972	1.40324	0.925338
P77148	ydhS	Uncharacterized protein YdhS OS=Escherichia coli (strain K12) GN=ydhS PE=4 SV=1 - [YDHS_ECOLI]	1.24367	0.823061	0.346398	0.602036	0.619701	0.499192	0.287102	0.647585	0.610875	0.569397	0.504365
P0ACX5	ydhZ	Uncharacterized protein YdhZ OS=Escherichia coli (strain K12) GN=ydhZ PE=4 SV=1 - [YDHZ_ECOLI]	2.01416	1.24098	0.982705	1.43432	1.13339	0.807864
P37766	ydiF	Acetate CoA-transferase YdiF OS=Escherichia coli (strain K12) GN=ydiF PE=3 SV=3 - [YDIF_ECOLI]	1.94793
P77781	ydiI	Esterase YdiI OS=Escherichia coli (strain K12) GN=ydiI PE=1 SV=1 - [YDII_ECOLI]	1.03152	2.05651	1.3621	2.33305	1.03799	2.21938
P77748	ydiJ	Uncharacterized protein YdiJ OS=Escherichia coli (strain K12) GN=ydiJ PE=4 SV=1 - [YDIJ_ECOLI]	0.592571	0.908493	0.540311	0.909142	0.426449	0.986961	0.476565	2.25148	1.84887	2.0877	1.12763
P77378	ydiR	Putative electron transfer flavoprotein subunit YdiR OS=Escherichia coli (strain K12) GN=ydiR PE=3 SV=1 - [YDIR_ECOLI]	1.98342
P77337	ydiS	Probable electron transfer flavoprotein-quinone oxidoreductase YdiS OS=Escherichia coli (strain K12) GN=ydiS PE=3 SV=1 - [YDIS_ECOLI]	1.39959
P77649	ydiU	UPF0061 protein YdiU OS=Escherichia coli (strain K12) GN=ydiU PE=3 SV=1 - [YDIU_ECOLI]	1.3295	1.00935	0.529027	1.56124	1.22263	1.05046	0.420899	1.34285	1.51468	1.34968	0.981063
P76206	ydiY	Uncharacterized protein YdiY OS=Escherichia coli (strain K12) GN=ydiY PE=4 SV=1 - [YDIY_ECOLI]		0.682781	0.479334	0.785131	0.447171	0.946802
P64479	ydiZ	Uncharacterized protein YdiZ OS=Escherichia coli (strain K12) GN=ydiZ PE=4 SV=1 - [YDIZ_ECOLI]		6.89607	1.59422	5.52855	1.14734	1.49667
P0ACY1	ydjA	Putative NAD(P)H nitroreductase YdjA OS=Escherichia coli (strain K12) GN=ydjA PE=1 SV=1 - [YDJA_ECOLI]	1.17439	0.899451	0.575719	0.885711	0.525353	0.911466	0.475921	1.09535	1.11834	1.17422	1.09596
P77721	ydjF	Uncharacterized HTH-type transcriptional regulator YdjF OS=Escherichia coli (strain K12) GN=ydjF PE=4 SV=1 - [YDJF_ECOLI]	1.48731	0.916519	0.483224	1.06582	0.689282	0.626744
P77256	ydjG	Uncharacterized oxidoreductase YdjG OS=Escherichia coli (strain K12) GN=ydjG PE=3 SV=1 - [YDJG_ECOLI]	0.733687
P77529	ydjN	Uncharacterized symporter YdjN OS=Escherichia coli (strain K12) GN=ydjN PE=3 SV=1 - [YDJN_ECOLI]	0.868631	0.660903	0.495763	0.760182	0.532788	0.965291	0.477582	1.38685	1.35315	1.52972	0.945649
P76220	ydjY	Uncharacterized protein YdjY OS=Escherichia coli (strain K12) GN=ydjY PE=4 SV=2 - [YDJY_ECOLI]	0.662761	0.999231	0.860611	1.15459	0.492108	1.78615
P76231	yeaC	Uncharacterized protein YeaC OS=Escherichia coli (strain K12) GN=yeaC PE=4 SV=2 - [YEAC_ECOLI]	1.24182
P39173	yeaD	Putative glucose-6-phosphate 1-epimerase OS=Escherichia coli (strain K12) GN=yeaD PE=1 SV=2 - [YEAD_ECOLI]	1.09411	0.628561	0.440102	0.902967	0.515062	0.862288	0.360423	1.23632	1.19981	1.22367	1.00187
P76234	yeaE	Uncharacterized protein YeaE OS=Escherichia coli (strain K12) GN=yeaE PE=4 SV=1 - [YEAE_ECOLI]	1.5203	0.835808	0.488882	1.0939	0.684918	0.862582	0.42616	1.34051	1.33551	1.48211	0.971867
P0ACY3	yeaG	Uncharacterized protein YeaG OS=Escherichia coli (strain K12) GN=yeaG PE=3 SV=1 - [YEAG_ECOLI]	2.02274	0.926512	0.225527	0.747687	0.907879	0.486146	0.482756	1.09083	0.960518	0.939786	0.817301
P76235	yeaH	UPF0229 protein YeaH OS=Escherichia coli (strain K12) GN=yeaH PE=3 SV=1 - [YEAH_ECOLI]	1.02491						0.565171	1.70805	1.29807	1.35647	1.35581
P76237	yeaJ	Putative diguanylate cyclase YeaJ OS=Escherichia coli (strain K12) GN=yeaJ PE=2 SV=2 - [YEAJ_ECOLI]		0.852783	0.427913	0.833037	0.404077	0.582552
P64483	yeaK	Uncharacterized protein YeaK OS=Escherichia coli (strain K12) GN=yeaK PE=4 SV=1 - [YEAK_ECOLI]	1.59442	0.752403	0.607105	0.9335	0.438964	0.851257	0.387375	2.10554	1.96298	1.8916	1.20131
P76243	yeaO	Uncharacterized protein YeaO OS=Escherichia coli (strain K12) GN=yeaO PE=4 SV=2 - [YEAO_ECOLI]	2.11174	1.1669	0.812503	1.07116	0.577694	0.869712	0.400006	2.32408	1.48222	2.58925	1.31559
P0AA91	yeaY	Uncharacterized lipoprotein YeaY OS=Escherichia coli (strain K12) GN=yeaY PE=4 SV=1 - [YEAY_ECOLI]	1.69732
P0A8A0	yebC	Probable transcriptional regulatory protein YebC OS=Escherichia coli (strain K12) GN=yebC PE=1 SV=1 - [YEBC_ECOLI]	1.08423	0.915289	0.630399	1.20903	0.414945	0.786198	0.441692	1.94473	1.40107	2.09846	1.19992
P33218	yebE	Inner membrane protein YebE OS=Escherichia coli (strain K12) GN=yebE PE=1 SV=2 - [YEBE_ECOLI]	1.54231	0.696448	0.434175	1.01122	0.81761	0.732688
P33219	yebF	Protein YebF OS=Escherichia coli (strain K12) GN=yebF PE=1 SV=2 - [YEBF_ECOLI]	1.3272	0.790596	0.564444	0.88742	0.503275	0.761486	0.198272	1.2602	1.20282	0.882085	0.739867
P0ACY9	yebG	Uncharacterized protein YebG OS=Escherichia coli (strain K12) GN=yebG PE=4 SV=1 - [YEBG_ECOLI]	0.838545	1.0674	0.765128	1.116	0.302538	0.392728
P64499	yebO	Uncharacterized protein YebO OS=Escherichia coli (strain K12) GN=yebO PE=4 SV=1 - [YEBO_ECOLI]	1.12884	0.783022	0.754311	1.18762	0.532472	0.604657
P64503	yebV	Uncharacterized protein YebV OS=Escherichia coli (strain K12) GN=yebV PE=4 SV=1 - [YEBV_ECOLI]	1.76261
P64506	yebY	Uncharacterized protein YebY OS=Escherichia coli (strain K12) GN=yebY PE=4 SV=1 - [YEBY_ECOLI]	1.84359	0.831759	0.559886	1.07697	0.460566	0.726759
P0AD05	yecA	Uncharacterized protein YecA OS=Escherichia coli (strain K12) GN=yecA PE=4 SV=1 - [YECA_ECOLI]	1.21494	1.11232	0.596425	0.937783	0.437108	0.839508	0.567006	1.70332	1.24209	1.77539	1.07399
P37774	yecC	Uncharacterized amino-acid ABC transporter ATP-binding protein YecC OS=Escherichia coli (strain K12) GN=yecC PE=3 SV=2 - [YECC_ECOLI]	1.12616	0.938126	0.514696	1.14683	0.751609	0.843113
P0ADI7	yecD	Isochorismatase family protein YecD OS=Escherichia coli (strain K12) GN=yecD PE=1 SV=2 - [YECD_ECOLI]	1.29741	1.17714	0.914698	1.0131	0.473027	1.0597	0.590771	1.69067	1.12097	1.89931	1.24729
P0AD07	yecF	Uncharacterized protein YecF OS=Escherichia coli (strain K12) GN=yecF PE=4 SV=1 - [YECF_ECOLI]	1.09808						0.591715	1.48971	1.37248	1.3414	0.954524
P0AD10	yecJ	Uncharacterized protein YecJ OS=Escherichia coli (strain K12) GN=yecJ PE=4 SV=1 - [YECJ_ECOLI]	1.13084						0.744665	1.56242	1.22026	1.99598	0.811908
P52007	yecM	Protein YecM OS=Escherichia coli (strain K12) GN=yecM PE=1 SV=3 - [YECM_ECOLI]	1.67226	0.925675	0.496444	1.21309	0.604962	0.655713	0.460653	1.41013	1.13509	1.23027	0.881732
P64515	yecN	Inner membrane protein YecN OS=Escherichia coli (strain K12) GN=yecN PE=1 SV=1 - [YECN_ECOLI]		1.12504	0.491433	0.964444	0.367019	0.629414
P76308	yecR	Uncharacterized protein YecR OS=Escherichia coli (strain K12) GN=yecR PE=4 SV=1 - [YECR_ECOLI]	0.681602
P31063	yedD	Uncharacterized lipoprotein YedD OS=Escherichia coli (strain K12) GN=yedD PE=4 SV=1 - [YEDD_ECOLI]	1.51547	0.895639	0.470075	1.19462	0.523779	0.713311	0.869116	2.8425	2.24747	2.81374	0.979005
P0AA31	yedF	UPF0033 protein YedF OS=Escherichia coli (strain K12) GN=yedF PE=1 SV=1 - [YEDF_ECOLI]	2.00611	1.88202	1.29927	1.74015	0.36184	1.32283
P46125	yedI	Inner membrane protein YedI OS=Escherichia coli (strain K12) GN=yedI PE=1 SV=2 - [YEDI_ECOLI]	1.52663
P46144	yedJ	Uncharacterized protein YedJ OS=Escherichia coli (strain K12) GN=yedJ PE=1 SV=2 - [YEDJ_ECOLI]	1.35725
P76329	yedP	Putative mannosyl-3-phosphoglycerate phosphatase OS=Escherichia coli (strain K12) GN=yedP PE=1 SV=1 - [MPGP_ECOLI]	1.78432	0.927012	0.32736	0.997241	0.926501	0.523117
P76339	yedV	Probable sensor-like histidine kinase YedV OS=Escherichia coli (strain K12) GN=yedV PE=1 SV=1 - [YEDV_ECOLI]		0.685745	0.426857	0.878346	0.602661	0.769286
P76340	yedW	Probable transcriptional regulatory protein YedW OS=Escherichia coli (strain K12) GN=yedW PE=1 SV=2 - [YEDW_ECOLI]	1.53745	0.646027	0.355697	0.737184	0.503525	0.886994
P76342	yedY	Sulfoxide reductase catalytic subunit YedY OS=Escherichia coli (strain K12) GN=yedY PE=1 SV=1 - [YEDY_ECOLI]	1.58972	0.861272	0.263969	0.839991	0.858678	0.467288
P33014	yeeD	UPF0033 protein YeeD OS=Escherichia coli (strain K12) GN=yeeD PE=3 SV=1 - [YEED_ECOLI]	0.767011	0.944761	1.07773	1.15417	0.560404	1.96816
P0A8A2	yeeN	Probable transcriptional regulatory protein YeeN OS=Escherichia coli (strain K12) GN=yeeN PE=1 SV=1 - [YEEN_ECOLI]	1.75118	0.743578	0.440533	1.32104	0.811085	0.723034	0.323609	1.22687	1.33137	1.14137	0.983636
P76361	yeeR	Inner membrane protein YeeR OS=Escherichia coli (strain K12) GN=yeeR PE=1 SV=2 - [YEER_ECOLI]	1.29413
P0A8M6	yeeX	UPF0265 protein YeeX OS=Escherichia coli (strain K12) GN=yeeX PE=1 SV=1 - [YEEX_ECOLI]	3.14178	0.876778	0.391787	1.03074	0.45354	0.824827	0.525148	4.16997	2.27867	3.24193	0.756386
P0AD12	yeeZ	Protein YeeZ OS=Escherichia coli (strain K12) GN=yeeZ PE=1 SV=1 - [YEEZ_ECOLI]	1.18828	0.916682	0.497606	1.16556	0.69135	0.811652	0.352864	1.03314	0.970094	1.00324	0.833487
P69346	yefM	Antitoxin YefM OS=Escherichia coli (strain K12) GN=yefM PE=1 SV=1 - [YEFM_ECOLI]	1.20364	1.03103	0.647891	1.31215	0.686826	0.922863	0.364989	1.2124	1.14237	1.35617	0.884069
P36928	yegD	Uncharacterized chaperone protein YegD OS=Escherichia coli (strain K12) GN=yegD PE=3 SV=2 - [YEGD_ECOLI]	0.931288
P76393	yegI	Uncharacterized protein YegI OS=Escherichia coli (strain K12) GN=yegI PE=4 SV=1 - [YEGI_ECOLI]	1.36751
P76402	yegP	UPF0339 protein YegP OS=Escherichia coli (strain K12) GN=yegP PE=1 SV=2 - [YEGP_ECOLI]	1.14482	0.613523	0.244688	0.560766	0.535074	0.443352	0.269876	0.945805	0.371	0.683226	0.593006
P76403	yegQ	Uncharacterized protease YegQ OS=Escherichia coli (strain K12) GN=yegQ PE=3 SV=1 - [YEGQ_ECOLI]	0.911098	0.721468	0.568657	0.868784	0.593292	0.793048
[truncated: 337 more rows]

## Sheet: log10
S6 Table. Global proteome quantification by TMT LC-MS/MS
(B) log10 of relative abundance
			WT	Upon HGT					Post-Evolution
UniProt Acc	Gene Name	Description	TMP 1.0 ug/mL	DHFR-22	DHFR-23	DHFR-35	DHFR-38	DHFR-39	DHFR-22	DHFR-23	DHFR-35	DHFR-38	DHFR-39
Average			0.0920301	-0.0568222	-0.285954	0.0248708	-0.215895	-0.107445	-0.372257	0.206705	0.151786	0.201751	-0.0353678
Standard Deviation			0.191175	0.190666	0.207249	0.223418	0.252951	0.180738	0.219276	0.207011	0.209321	0.228921	0.15714
P0ABD5	accA	Acetyl-coenzyme A carboxylase carboxyl transferase subunit alpha OS=Escherichia coli (strain K12) GN=accA PE=1 SV=2 - [ACCA_ECOLI]	0.377504	-0.100093	-0.380254	-0.101096	-0.472694	-0.183638	-0.364213	0.194385	0.0614547	0.120818	-0.219939
P0ABD8	accB	Biotin carboxyl carrier protein of acetyl-CoA carboxylase OS=Escherichia coli (strain K12) GN=accB PE=1 SV=1 - [BCCP_ECOLI]	-0.0973027	-0.0403234	-0.226204	0.0131499	-0.469123	-0.154303	-0.43827	0.256597	0.169705	0.243231	0.0732324
P24182	accC	Biotin carboxylase OS=Escherichia coli (strain K12) GN=accC PE=1 SV=2 - [ACCC_ECOLI]	0.00315237	-0.104124	-0.31985	-0.0294019	-0.214166	-0.177004	-0.369112	0.126769	0.140797	0.117855	-0.0762448
P0A9Q5	accD	Acetyl-coenzyme A carboxylase carboxyl transferase subunit beta OS=Escherichia coli (strain K12) GN=accD PE=1 SV=1 - [ACCD_ECOLI]	-0.0689334	-0.0122702	-0.256771	-0.0202672	-0.433638	-0.120727	-0.238027	0.279573	0.236489	0.261856	-0.0375172
P0A9G6	aceA	Isocitrate lyase OS=Escherichia coli (strain K12) GN=aceA PE=1 SV=1 - [ACEA_ECOLI]	-0.474284	-0.0727112	-0.46704	-0.281272	-0.554447	-0.122349	-0.328786	-0.160128	-0.117757	-0.191308	-0.155362
P08997	aceB	Malate synthase A OS=Escherichia coli (strain K12) GN=aceB PE=1 SV=1 - [MASY_ECOLI]	-0.258211	-0.0442064	-0.477819	-0.225471	-0.376627	-0.200641	-0.430325	-0.249347	-0.155833	-0.306211	-0.298981
P0AFG8	aceE	Pyruvate dehydrogenase E1 component OS=Escherichia coli (strain K12) GN=aceE PE=1 SV=2 - [ODP1_ECOLI]	-0.0921019	-0.073711	-0.3152	-0.00597937	-0.408082	-0.0931007	-0.251256	0.303974	0.213455	0.279557	-0.101836
P06959	aceF	Dihydrolipoyllysine-residue acetyltransferase component of pyruvate dehydrogenase complex OS=Escherichia coli (strain K12) GN=aceF PE=1 SV=3 - [ODP2_ECOLI]	0.231516	-0.00888075	-0.0385426	0.222387	-0.175887	0.195437
P11071	aceK	Isocitrate dehydrogenase kinase/phosphatase OS=Escherichia coli (strain K12) GN=aceK PE=1 SV=2 - [ACEK_ECOLI]	0.0951425
P0A6A3	ackA	Acetate kinase OS=Escherichia coli (strain K12) GN=ackA PE=1 SV=1 - [ACKA_ECOLI]	0.22509	-0.00911096	-0.225963	0.247943	-0.0501758	0.000743053	-0.301171	0.235558	0.196921	0.21303	0.0603766
P25516	acnA	Aconitate hydratase 1 OS=Escherichia coli (strain K12) GN=acnA PE=1 SV=3 - [ACON1_ECOLI]	0.187333	-0.0100754	-0.335549	0.0272752	-0.121535	-0.114193	-0.416976	0.0682001	0.034972	0.0170069	-0.176111
P36683	acnB	Aconitate hydratase 2 OS=Escherichia coli (strain K12) GN=acnB PE=1 SV=3 - [ACON2_ECOLI]	-0.0205381	-0.0728746	-0.36328	-0.0565585	-0.316233	-0.0451889	-0.321312	0.114685	0.160698	0.109392	-0.0165598
P21515	acpH	Acyl carrier protein phosphodiesterase OS=Escherichia coli (strain K12) GN=acpH PE=3 SV=2 - [ACPH_ECOLI]	0.311103
P0A6A8	acpP	Acyl carrier protein OS=Escherichia coli (strain K12) GN=acpP PE=1 SV=2 - [ACP_ECOLI]	0.019103	0.0586935	-0.16912	0.104064	-0.507285	-0.251944	-0.00225235	0.267566	0.0922486	0.373815	0.152704
P24224	acpS	Holo-[acyl-carrier-protein] synthase OS=Escherichia coli (strain K12) GN=acpS PE=1 SV=3 - [ACPS_ECOLI]	0.0359554	0.0358308	-0.268629	0.118837	-0.196286	-0.0853673
P0AE06	acrA	Acriflavine resistance protein A OS=Escherichia coli (strain K12) GN=acrA PE=1 SV=1 - [ACRA_ECOLI]	0.0538399	-0.0128739	-0.338259	-0.11577	-0.427943	-0.333662	-0.0774578	-0.260581	-0.154691	-0.121847	-0.521043
P31224	acrB	Acriflavine resistance protein B OS=Escherichia coli (strain K12) GN=acrB PE=1 SV=1 - [ACRB_ECOLI]	0.0736612	-0.135718	-0.461037	-0.110717	-0.508601	-0.2835
P24177	acrD	Probable aminoglycoside efflux pump OS=Escherichia coli (strain K12) GN=acrD PE=3 SV=3 - [ACRD_ECOLI]	-0.24694
P0ACS9	acrR	HTH-type transcriptional regulator AcrR OS=Escherichia coli (strain K12) GN=acrR PE=1 SV=1 - [ACRR_ECOLI]		0.10141	-0.20592	0.150783	0.0472642	-0.130183
P27550	acs	Acetyl-coenzyme A synthetase OS=Escherichia coli (strain K12) GN=acs PE=1 SV=2 - [ACSA_ECOLI]	0.193622	-0.0849717	-0.69474	-0.0866772	-0.206881	-0.243716	-0.477224	-0.181458	-0.0587324	-0.305101	-0.323336
P26646	acuI	Probable acrylyl-CoA reductase AcuI OS=Escherichia coli (strain K12) GN=acuI PE=1 SV=1 - [ACUI_ECOLI]	0.328465	0.00736768	-0.267954	0.115195	-0.012767	-0.0629108	-0.409037	0.155842	0.0620236	0.181701	-0.0483585
P22333	add	Adenosine deaminase OS=Escherichia coli (strain K12) GN=add PE=3 SV=2 - [ADD_ECOLI]	0.398394	-0.259273	-0.319154	0.0434205	-0.237787	-0.208493
P31441	ade	Adenine deaminase OS=Escherichia coli (strain K12) GN=ade PE=1 SV=2 - [ADEC_ECOLI]		0.0924426	-0.150527	0.22019	-0.153318	-0.0297257	-0.449693	0.221832	0.216514	0.27913	-0.0719936
P0A9Q7	adhE	Aldehyde-alcohol dehydrogenase OS=Escherichia coli (strain K12) GN=adhE PE=1 SV=2 - [ADHE_ECOLI]	0.339598	-0.304788	-0.294653	-0.118026	-0.384824	0.268342	-0.120561	0.360053	0.31439	0.289358	0.206649
P39451	adhP	Alcohol dehydrogenase, propanol-preferring OS=Escherichia coli (strain K12) GN=adhP PE=1 SV=1 - [ADHP_ECOLI]	0.170047
P69441	adk	Adenylate kinase OS=Escherichia coli (strain K12) GN=adk PE=1 SV=1 - [KAD_ECOLI]	-0.191285	-0.155238	-0.305152	-0.153268	-0.530959	-0.144997	-0.549479	0.196078	0.117479	0.213574	-0.0053189
P23872	aes	Acetyl esterase OS=Escherichia coli (strain K12) GN=aes PE=1 SV=3 - [AES_ECOLI]	0.575116						-0.408688	0.182332	0.226759	0.175876	-0.0463012
P0ACK2	agaR	Putative aga operon transcriptional repressor OS=Escherichia coli (strain K12) GN=agaR PE=4 SV=1 - [AGAR_ECOLI]	-0.0196125	-0.135985	-0.310825	-0.118717	-0.425173	-0.129306	-0.372249	0.168862	0.108824	0.152735	-0.065354
P19926	agp	Glucose-1-phosphatase OS=Escherichia coli (strain K12) GN=agp PE=1 SV=1 - [AGP_ECOLI]	0.196194	0.0485496	-0.333562	0.0562588	-0.153805	-0.0436509	-0.391598	-0.0517567	0.066921	-0.10917	-0.101741
P0AE08	ahpC	Alkyl hydroperoxide reductase subunit C OS=Escherichia coli (strain K12) GN=ahpC PE=1 SV=2 - [AHPC_ECOLI]	0.174122	-0.0297567	-0.266049	-0.0432396	-0.357972	-0.179682	-0.322283	0.159928	0.0797361	0.162256	-0.0612564
P35340	ahpF	Alkyl hydroperoxide reductase subunit F OS=Escherichia coli (strain K12) GN=ahpF PE=1 SV=2 - [AHPF_ECOLI]	0.0708801	0.0015556	-0.286217	0.122324	-0.086113	-0.131647	-0.450178	0.207153	0.141198	0.169327	-0.0882556
P27250	ahr	Uncharacterized zinc-type alcohol dehydrogenase-like protein YjgB OS=Escherichia coli (strain K12) GN=yjgB PE=3 SV=2 - [YJGB_ECOLI]	0.132558	0.00188919	-0.425503	-0.0488184	-0.141897	-0.245941
P0A959	alaA	Glutamate-pyruvate aminotransferase AlaA OS=Escherichia coli (strain K12) GN=alaA PE=1 SV=1 - [ALAA_ECOLI]	-0.231257	-0.145621	-0.435638	-0.0210754	-0.161187	-0.163041	-0.440096	0.0524888	0.0566261	0.160322	-0.0533871
P77434	alaC	Glutamate-pyruvate aminotransferase AlaC OS=Escherichia coli (strain K12) GN=alaC PE=1 SV=1 - [ALAC_ECOLI]	0.0805861	-0.130596	-0.372713	0.0183522	-0.119214	-0.121031
P00957	alaS	Alanine--tRNA ligase OS=Escherichia coli (strain K12) GN=alaS PE=1 SV=2 - [SYA_ECOLI]	-0.183056	-0.103365	-0.323028	-0.131652	-0.468399	-0.12321	-0.415532	0.123407	0.0855014	0.149896	-0.08618
P25553	aldA	Lactaldehyde dehydrogenase OS=Escherichia coli (strain K12) GN=aldA PE=1 SV=2 - [ALDA_ECOLI]	-0.215598	-0.218989	-0.578387	-0.289337	-0.618041	-0.0707674	-0.373229	-0.0694615	0.00843166	0.126607	-0.0217834
P37685	aldB	Aldehyde dehydrogenase B OS=Escherichia coli (strain K12) GN=aldB PE=1 SV=2 - [ALDB_ECOLI]	0.176712	0.249998	-0.369305	0.0510054	-0.160728	-0.0877496
P04395	alkA	DNA-3-methyladenine glycosylase 2 OS=Escherichia coli (strain K12) GN=alkA PE=1 SV=1 - [3MG2_ECOLI]	0.152552	0.0444528	-0.257673	0.0570495	-0.183803	-0.116764	-0.372464	0.00220082	0.00889908	-0.0374607	-0.0470884
P0ACN4	allR	HTH-type transcriptional repressor AllR OS=Escherichia coli (strain K12) GN=allR PE=1 SV=1 - [ALLR_ECOLI]	-0.00923417	-0.1038	-0.385666	-0.142502	-0.356763	-0.241458
P0A6B4	alr	Alanine racemase, biosynthetic OS=Escherichia coli (strain K12) GN=alr PE=1 SV=1 - [ALR1_ECOLI]	0.138048	-0.00037999	-0.248172	0.183795	0.0294946	-0.0503771
P39265	alsB	D-allose-binding periplasmic protein OS=Escherichia coli (strain K12) GN=alsB PE=1 SV=1 - [ALSB_ECOLI]	0.0291714	-0.314417	-0.353109	0.151592	0.065343	-0.223535	-0.6984	-0.000396117	0.0475667	0.0864754	-0.0269657
P26365	amiB	N-acetylmuramoyl-L-alanine amidase AmiB OS=Escherichia coli (strain K12) GN=amiB PE=1 SV=2 - [AMIB_ECOLI]	0.292341	-0.0365934	-0.318091	0.0529279	-0.135073	-0.195976	-0.53816	0.10311	0.0504215	0.0359764	-0.173465
P63883	amiC	N-acetylmuramoyl-L-alanine amidase AmiC OS=Escherichia coli (strain K12) GN=amiC PE=1 SV=1 - [AMIC_ECOLI]	0.00207833	-0.136527	-0.330005	-0.0617706	-0.282388	-0.101504
P75820	amiD	N-acetylmuramoyl-L-alanine amidase AmiD OS=Escherichia coli (strain K12) GN=amiD PE=1 SV=1 - [AMID_ECOLI]	0.071985
P0AE12	amn	AMP nucleosidase OS=Escherichia coli (strain K12) GN=amn PE=1 SV=1 - [AMN_ECOLI]	-0.0122788	-0.0970159	-0.340147	-0.279842	-0.621162	-0.10489	-0.32009	0.238507	0.0939794	0.243823	-0.059253
P00811	ampC	Beta-lactamase OS=Escherichia coli (strain K12) GN=ampC PE=1 SV=1 - [AMPC_ECOLI]	0.0231318	-0.058664	-0.348543	0.077151	-0.122183	-0.128619	-0.444099	0.0978234	0.108269	0.116214	-0.110947
P13016	ampD	1,6-anhydro-N-acetylmuramyl-L-alanine amidase AmpD OS=Escherichia coli (strain K12) GN=ampD PE=2 SV=1 - [AMPD_ECOLI]	0.25995	0.351555	0.0991954	0.389436	0.0784306	0.300893	0.284241	0.947733	0.886107	0.934287	0.197724
P0AE14	ampE	Protein AmpE OS=Escherichia coli (strain K12) GN=ampE PE=1 SV=1 - [AMPE_ECOLI]	0.488879	0.219133	-0.173726	0.284264	0.129847	-0.0237843
P0AD70	ampH	D-alanyl-D-alanine-carboxypeptidase/endopeptidase AmpH OS=Escherichia coli (strain K12) GN=ampH PE=1 SV=1 - [AMPH_ECOLI]	0.026405	-0.1823	-0.444568	-0.115557	-0.285611	-0.156615
P26612	amyA	Cytoplasmic alpha-amylase OS=Escherichia coli (strain K12) GN=amyA PE=3 SV=3 - [AMY2_ECOLI]	0.274543	-0.172942	-0.454919	-0.0500028	-0.156308	-0.156556	-0.178219	0.124675	0.169334	0.134138	-0.0781741
P77570	anmK	Anhydro-N-acetylmuramic acid kinase OS=Escherichia coli (strain K12) GN=anmK PE=1 SV=1 - [ANMK_ECOLI]	0.408021	-0.0246108	-0.279465	0.162044	-0.0519249	-0.0687352
P0A962	ansA	L-asparaginase 1 OS=Escherichia coli (strain K12) GN=ansA PE=1 SV=1 - [ASPG1_ECOLI]	-0.0918051	0.520984	0.22488	0.649851	0.352216	0.44537
P00805	ansB	L-asparaginase 2 OS=Escherichia coli (strain K12) GN=ansB PE=1 SV=2 - [ASPG2_ECOLI]	-0.195369	-0.0269064	-0.061253	0.489397	-0.0178536	0.187102		0.295815	0.399155	0.385654	0.226783
P62672	apaG	Protein ApaG OS=Escherichia coli (strain K12) GN=apaG PE=3 SV=1 - [APAG_ECOLI]		0.0538195	-0.323446	0.102787	-0.197867	-0.173191	-0.890362	0.468596	0.0309554	0.137284	0.478137
P05637	apaH	Bis(5'-nucleosyl)-tetraphosphatase [symmetrical] OS=Escherichia coli (strain K12) GN=apaH PE=1 SV=2 - [APAH_ECOLI]	0.267113	-0.038818	-0.245009	0.183787	-0.0474055	-0.105924
P0AB85	apbE	Thiamine biosynthesis lipoprotein ApbE OS=Escherichia coli (strain K12) GN=apbE PE=1 SV=1 - [APBE_ECOLI]	0.00416139	0.298034	-0.0773198	0.290196	0.0161987	0.0914595	-0.611221	0.204138	-0.0384804	0.13977	-0.108937
Q3T004	APCS	*CON* Serum amyloid P-component OS=Bos taurus GN=APCS PE=2 SV=1 - [SAMP_BOVIN]		-0.0911189	-0.385001	0.910989	0.806251	0.00516976
P0AE22	aphA	Class B acid phosphatase OS=Escherichia coli (strain K12) GN=aphA PE=1 SV=1 - [APHA_ECOLI]	0.100804	-0.0644243	-0.152871	0.0680588	-0.384103	0.0241378	-0.498803	0.112534	0.0524706	0.136472	0.014318
P07102	appA	Periplasmic AppA protein OS=Escherichia coli (strain K12) GN=appA PE=1 SV=2 - [PPA_ECOLI]	0.472306	0.0118174	-0.338182	0.201178	0.376197	-0.123814
P26459	appC	Cytochrome bd-II oxidase subunit 1 OS=Escherichia coli (strain K12) GN=appC PE=1 SV=1 - [APPC_ECOLI]	-0.0564298
P69503	apt	Adenine phosphoribosyltransferase OS=Escherichia coli (strain K12) GN=apt PE=1 SV=1 - [APT_ECOLI]	0.0306325	-0.248149	-0.381697	-0.125721	-0.440205	-0.177881	-0.355642	0.303518	0.237265	0.217965	0.145101
P0A9E0	araC	Arabinose operon regulatory protein OS=Escherichia coli (strain K12) GN=araC PE=1 SV=1 - [ARAC_ECOLI]		-0.463502		0.00190862	-0.342397	-0.251524
P02924	araF	L-arabinose-binding periplasmic protein OS=Escherichia coli (strain K12) GN=araF PE=1 SV=2 - [ARAF_ECOLI]	0.00908912	-0.0887974	-0.400782	0.00612811	-0.332532	-0.046449
P0A9Q1	arcA	Aerobic respiration control protein ArcA OS=Escherichia coli (strain K12) GN=arcA PE=1 SV=1 - [ARCA_ECOLI]	0.358277	0.0342372	-0.190647	0.108347	-0.0940979	-0.0634029	-0.39311	0.348935	0.220452	0.265295	-0.0745502
P0AEC3	arcB	Aerobic respiration control sensor protein ArcB OS=Escherichia coli (strain K12) GN=arcB PE=1 SV=1 - [ARCB_ECOLI]	0.217028	0.0568269	-0.12043	0.0881056	-0.367916	-0.101757	-0.504941	0.253259	0.160322	0.415757	0.19013
P0A6C5	argA	Amino-acid acetyltransferase OS=Escherichia coli (strain K12) GN=argA PE=1 SV=1 - [ARGA_ECOLI]		-0.286487	-0.344843	-0.792873	-0.999607	-0.109371	-0.415396	0.096615	0.0438077	0.085679	-0.0374176
P0A6C8	argB	Acetylglutamate kinase OS=Escherichia coli (strain K12) GN=argB PE=1 SV=1 - [ARGB_ECOLI]	0.121741	-0.325988	-0.359766	-0.606457	-0.753931	-0.23617	-0.591162	0.0319596	0.0059538	0.122622	-0.116953
P11446	argC	N-acetyl-gamma-glutamyl-phosphate reductase OS=Escherichia coli (strain K12) GN=argC PE=3 SV=1 - [ARGC_ECOLI]	-0.360418	-0.339376	-0.347217	-1.00938	-1.05174	-0.157133	-0.12801	0.336931	0.0602646	0.34772	0.0954864
P18335	argD	Acetylornithine/succinyldiaminopimelate aminotransferase OS=Escherichia coli (strain K12) GN=argD PE=1 SV=4 - [ARGD_ECOLI]	-0.403534	-0.367446	-0.362059	-0.917856	-0.963956	-0.153536	-0.377538	0.0973481	0.0607196	0.131826	-0.0860684
P23908	argE	Acetylornithine deacetylase OS=Escherichia coli (strain K12) GN=argE PE=1 SV=2 - [ARGE_ECOLI]	0.248797	-0.118463	-0.193589	-0.448902	-0.594166	-0.172257	-0.271833	0.236953	0.191077	0.251344	-0.04184
P06960	argF	Ornithine carbamoyltransferase chain F OS=Escherichia coli (strain K12) GN=argF PE=1 SV=4 - [OTC2_ECOLI]	-0.120358	-0.000116598	-0.202287	0.0231698	-0.234541	-0.0129153	-0.383507	0.194458	0.348454	0.330751	0.160227
P0A6E4	argG	Argininosuccinate synthase OS=Escherichia coli (strain K12) GN=argG PE=1 SV=2 - [ASSY_ECOLI]	-0.0499098	-0.278703	-0.329765	-0.696727	-0.815236	-0.122858	-0.361429	0.16291	0.115519	0.207869	-0.0569755
P11447	argH	Argininosuccinate lyase OS=Escherichia coli (strain K12) GN=argH PE=1 SV=3 - [ARLY_ECOLI]	-0.116813	-0.202039	-0.298054	-0.921465	-1.1167	-0.0532412	-0.225336	0.492939	0.395396	0.554218	0.0858904
P04391	argI	Ornithine carbamoyltransferase chain I OS=Escherichia coli (strain K12) GN=argI PE=1 SV=3 - [OTC1_ECOLI]	-0.141058	-0.464123	-0.489007	-1.08261	-1.36949	-0.237374
P0A6D0	argR	Arginine repressor OS=Escherichia coli (strain K12) GN=argR PE=1 SV=1 - [ARGR_ECOLI]	0.00749771	-0.0632072	-0.285565	-0.0845726	-0.440496	-0.190464	-0.406341	0.236146	0.147542	0.17644	-0.136739
P11875	argS	Arginine--tRNA ligase OS=Escherichia coli (strain K12) GN=argS PE=1 SV=1 - [SYR_ECOLI]	0.0980824	-0.112498	-0.30477	0.0482478	-0.110298	-0.131008	-0.422548	0.120026	0.154984	0.0795657	-0.0495756
P09551	argT	Lysine-arginine-ornithine-binding periplasmic protein OS=Escherichia coli (strain K12) GN=argT PE=1 SV=3 - [ARGT_ECOLI]	0.00238553	-0.194333	-0.67855	-0.403268	-0.599404	-0.368134	-0.47162	-0.164733	-0.0840603	-0.235416	-0.216046
P77398	arnA	Bifunctional polymyxin resistance protein ArnA OS=Escherichia coli (strain K12) GN=arnA PE=1 SV=1 - [ARNA_ECOLI]	0.0535697
P77690	arnB	UDP-4-amino-4-deoxy-L-arabinose--oxoglutarate aminotransferase OS=Escherichia coli (strain K12) GN=arnB PE=1 SV=2 - [ARNB_ECOLI]	0.2548	-0.129989	-0.359774	0.0126576	-0.10246	-0.18232
P0A6D3	aroA	3-phosphoshikimate 1-carboxyvinyltransferase OS=Escherichia coli (strain K12) GN=aroA PE=1 SV=1 - [AROA_ECOLI]	0.0308643	0.0126102	-0.273341	0.109132	-0.0912249	-0.00211206	-0.206339	0.370665	0.375807	0.369174	0.0494142
P07639	aroB	3-dehydroquinate synthase OS=Escherichia coli (strain K12) GN=aroB PE=3 SV=1 - [AROB_ECOLI]	0.0902813	-0.0363428	-0.277356	0.0775231	-0.152041	-0.0316843	-0.472958	0.0568351	-0.0138775	0.0254847	-0.130035
P12008	aroC	Chorismate synthase OS=Escherichia coli (strain K12) GN=aroC PE=1 SV=4 - [AROC_ECOLI]	0.05614	-0.0416443	-0.288862	-0.084368	-0.511801	-0.0275695	-0.470485	0.11794	0.0686596	0.11332	-0.00818707
P05194	aroD	3-dehydroquinate dehydratase OS=Escherichia coli (strain K12) GN=aroD PE=1 SV=2 - [AROD_ECOLI]	0.217293	-0.141176	-0.386404	-0.0386171	-0.247639	-0.16198	-0.423687	0.173514	0.131726	0.175325	-0.0453323
P15770	aroE	Shikimate dehydrogenase OS=Escherichia coli (strain K12) GN=aroE PE=1 SV=1 - [AROE_ECOLI]	0.102143	-0.0652714	-0.299032	0.0830313	-0.100965	-0.111206	-0.379801	-0.0829596	-0.00669599	-0.010547	-0.145298
P00888	aroF	Phospho-2-dehydro-3-deoxyheptonate aldolase, Tyr-sensitive OS=Escherichia coli (strain K12) GN=aroF PE=1 SV=1 - [AROF_ECOLI]	0.355867	0.148578	-0.175392	0.679059	0.550731	0.351608	-0.699236	0.158159	-0.256884	0.167909	0.353181
P0AB91	aroG	Phospho-2-dehydro-3-deoxyheptonate aldolase, Phe-sensitive OS=Escherichia coli (strain K12) GN=aroG PE=1 SV=1 - [AROG_ECOLI]	-0.00649676	0.139293	-0.181729	0.0573207	-0.181421	0.172164	-0.377471	0.12939	0.072264	0.172359	0.025097
P00887	aroH	Phospho-2-dehydro-3-deoxyheptonate aldolase, Trp-sensitive OS=Escherichia coli (strain K12) GN=aroH PE=3 SV=4 - [AROH_ECOLI]	-0.0731279	-0.122138	-0.190898	0.111241	-0.145551	0.0471033	-0.35341	0.277796	0.275761	0.314681	0.143324
P0A6D7	aroK	Shikimate kinase 1 OS=Escherichia coli (strain K12) GN=aroK PE=1 SV=2 - [AROK_ECOLI]	-0.0192565	-0.0865593	-0.278154	-0.0857387	-0.364972	-0.113471	-0.398081	0.171685	0.137264	0.200765	0.000956587
P0A6E1	aroL	Shikimate kinase 2 OS=Escherichia coli (strain K12) GN=aroL PE=1 SV=3 - [AROL_ECOLI]	0.225702	0.0613118	-0.311881	0.171492	-0.149249	-0.0159805	-0.291325	0.352292	0.256211	0.390059	0.0738983
P0AE28	aroM	Protein AroM OS=Escherichia coli (strain K12) GN=aroM PE=4 SV=1 - [AROM_ECOLI]	0.153721	-0.00530802	-0.297918	-0.0168407	-0.290145	-0.20783
P0AB96	arsC	Arsenate reductase OS=Escherichia coli (strain K12) GN=arsC PE=3 SV=1 - [ARSC_ECOLI]	0.223821	0.320393	-0.00811784	0.264692	-0.183846	0.0283459
P30859	artI	Putative ABC transporter arginine-binding protein 2 OS=Escherichia coli (strain K12) GN=artI PE=1 SV=3 - [ARTI_ECOLI]	0.16408	-0.198855	-0.356119	-0.466094	-0.739831	-0.216252	-0.661966	0.156825	0.0721166	0.151241	-0.083569
P30860	artJ	ABC transporter arginine-binding protein 1 OS=Escherichia coli (strain K12) GN=artJ PE=1 SV=2 - [ARTJ_ECOLI]	-0.140089	-0.325379	-0.386538	-0.85106	-0.939158	-0.204704	-0.763069	0.0896786	0.0624949	0.114954	-0.142148
P0AE30	artM	Arginine ABC transporter permease protein ArtM OS=Escherichia coli (strain K12) GN=artM PE=1 SV=1 - [ARTM_ECOLI]		-0.440243	-0.545767	-0.50421	-0.465658	-0.50339
P0AAF6	artP	Arginine transport ATP-binding protein ArtP OS=Escherichia coli (strain K12) GN=artP PE=1 SV=1 - [ARTP_ECOLI]	0.204877	-0.328863	-0.477862	-0.491853	-0.718831	-0.275909
P0AE34	artQ	Arginine ABC transporter permease protein ArtQ OS=Escherichia coli (strain K12) GN=artQ PE=1 SV=1 - [ARTQ_ECOLI]		-0.39582	-0.660526	-0.728677	-0.877496	-0.387842
P24240	ascB	6-phospho-beta-glucosidase AscB OS=Escherichia coli (strain K12) GN=ascB PE=3 SV=2 - [ASCB_ECOLI]		-0.296757	-0.5538	-0.0573689	-0.240048	-0.283899
P24242	ascG	HTH-type transcriptional regulator AscG OS=Escherichia coli (strain K12) GN=ascG PE=1 SV=4 - [ASCG_ECOLI]		-0.073906	-0.275844	-0.0491782	-0.405308	-0.15559
P0A9Q9	asd	Aspartate-semialdehyde dehydrogenase OS=Escherichia coli (strain K12) GN=asd PE=1 SV=1 - [DHAS_ECOLI]	-0.0524785	-0.155262	-0.341172	-0.0863707	-0.341001	-0.045306	-0.344824	0.0976202	0.0657444	0.129919	0.021636
P28249	asmA	Protein AsmA OS=Escherichia coli (strain K12) GN=asmA PE=4 SV=2 - [ASMA_ECOLI]	0.0299058	-0.143875	-0.4896	-0.112337	-0.355337	-0.295566
P00963	asnA	Aspartate--ammonia ligase OS=Escherichia coli (strain K12) GN=asnA PE=1 SV=1 - [ASNA_ECOLI]	-0.360183	-0.466603	-0.372058	-0.0265847	-0.578017	-0.179638	-0.644117	-0.110003	0.0377151	-0.249918	-0.239195
P22106	asnB	Asparagine synthetase B [glutamine-hydrolyzing] OS=Escherichia coli (strain K12) GN=asnB PE=1 SV=3 - [ASNB_ECOLI]	-0.197782	-0.244232	-0.36183	-0.0243497	-0.467957	-0.189011	-0.501766	0.089516	0.0344006	0.111348	-0.126437
P0ACI6	asnC	Regulatory protein AsnC OS=Escherichia coli (strain K12) GN=asnC PE=1 SV=1 - [ASNC_ECOLI]	0.0515569	-0.0661412	-0.337607	0.0144694	-0.198586	-0.167233
P0A8M0	asnS	Asparagine--tRNA ligase OS=Escherichia coli (strain K12) GN=asnS PE=1 SV=2 - [SYN_ECOLI]	-0.233741	-0.0946669	-0.26592	-0.0835106	-0.312275	-0.0791346	-0.327392	0.169141	0.119676	0.16492	-0.0544094
P0AC38	aspA	Aspartate ammonia-lyase OS=Escherichia coli (strain K12) GN=aspA PE=1 SV=1 - [ASPA_ECOLI]	0.0505997	-0.0520594	-0.254949	0.113721	-0.183368	-0.0288741	-0.511284	0.113133	0.128287	0.116839	-0.149973
P00509	aspC	Aspartate aminotransferase OS=Escherichia coli (strain K12) GN=aspC PE=1 SV=1 - [AAT_ECOLI]	0.107212	-0.0213064	-0.300743	0.0907114	-0.0847089	-0.0395854	-0.429331	0.14772	0.165555	0.12032	0.0303516
P21889	aspS	Aspartate--tRNA ligase OS=Escherichia coli (strain K12) GN=aspS PE=1 SV=1 - [SYD_ECOLI]	-0.126098	-0.118218	-0.319576	-0.0756605	-0.342142	-0.0831011	-0.282547	0.180258	0.103693	0.176039	0.0150326
P0AE37	astA	Arginine N-succinyltransferase OS=Escherichia coli (strain K12) GN=astA PE=2 SV=1 - [ASTA_ECOLI]	0.166744
P76216	astB	N-succinylarginine dihydrolase OS=Escherichia coli (strain K12) GN=astB PE=1 SV=1 - [ASTB_ECOLI]	0.265707	-0.0775672	-0.279757	0.120141	-0.0138148	-0.114287
P77581	astC	Succinylornithine transaminase OS=Escherichia coli (strain K12) GN=astC PE=1 SV=1 - [ASTC_ECOLI]	0.127627	-0.207446	-0.747963	-0.0669549	-0.208949	-0.201293
P76217	astD	N-succinylglutamate 5-semialdehyde dehydrogenase OS=Escherichia coli (strain K12) GN=astD PE=1 SV=1 - [ASTD_ECOLI]	0.248599	-0.380663	-0.719749	-0.237914	-0.40386	-0.40708
P76458	atoD	Acetate CoA-transferase subunit alpha OS=Escherichia coli (strain K12) GN=atoD PE=1 SV=1 - [ATOD_ECOLI]		-4.59308e-05	-0.426954	0.59639	0.606632	-0.113181
P0ABB0	atpA	ATP synthase subunit alpha OS=Escherichia coli (strain K12) GN=atpA PE=1 SV=1 - [ATPA_ECOLI]	0.125149	-0.0373309	-0.322241	-0.0456143	-0.313705	-0.15182	-0.478648	0.121358	-0.0157985	0.0216614	-0.222714
P0A6E6	atpC	ATP synthase epsilon chain OS=Escherichia coli (strain K12) GN=atpC PE=1 SV=2 - [ATPE_ECOLI]	0.229582	-0.105833	-0.362202	-0.00519073	-0.319804	-0.154531
P0ABB4	atpD	ATP synthase subunit beta OS=Escherichia coli (strain K12) GN=atpD PE=1 SV=2 - [ATPB_ECOLI]	0.295113	0.000103276	-0.261141	0.0535947	-0.342694	-0.0866644	-0.320391	0.183594	0.105805	0.117752	-0.173885
P68699	atpE	ATP synthase subunit c OS=Escherichia coli (strain K12) GN=atpE PE=1 SV=1 - [ATPL_ECOLI]	0.168761	0.0949106	-0.334675	0.0119549	-0.426861	-0.143884
P0ABA0	atpF	ATP synthase subunit b OS=Escherichia coli (strain K12) GN=atpF PE=1 SV=1 - [ATPF_ECOLI]	0.224482	-0.00152133	-0.232161	0.0580616	-0.108895	-0.148884	0.0100905	0.475776	0.362509	0.372454	-0.0078338
P0ABA6	atpG	ATP synthase gamma chain OS=Escherichia coli (strain K12) GN=atpG PE=1 SV=1 - [ATPG_ECOLI]	0.126603	-0.0435719	-0.308651	-0.0421307	-0.404302	-0.15398	-0.321901	0.313151	0.233149	0.301118	-0.183953
P0ABA4	atpH	ATP synthase subunit delta OS=Escherichia coli (strain K12) GN=atpH PE=1 SV=1 - [ATPD_ECOLI]	0.310462	0.12961	-0.232127	0.0413331	-0.481546	-0.136994	-0.574777	0.314542	-0.239339	0.304794	-0.153863
P09053	avtA	Valine--pyruvate aminotransferase OS=Escherichia coli (strain K12) GN=avtA PE=1 SV=3 - [AVTA_ECOLI]	0.104318	0.0474359	-0.245685	0.241885	0.088114	-0.0196804	-0.165983	0.429007	0.439137	0.480227	0.00442844
P41407	azoR	FMN-dependent NADH-azoreductase OS=Escherichia coli (strain K12) GN=azoR PE=1 SV=3 - [AZOR_ECOLI]	0.17714	-0.0662919	-0.285855	0.0082754	-0.21788	-0.153227	-0.376357	0.153847	0.123279	0.0814751	-0.0189911
P33666	b1401/b1405	Putative uncharacterized protein YdbA OS=Escherichia coli (strain K12) GN=ydbA PE=5 SV=2 - [YDBA_ECOLI]		0.357707	-0.178753	0.0768894	-0.393481	0.0124763
P76464	b2227/b2228	Putative UPF0192 protein YfaS OS=Escherichia coli (strain K12) GN=yfaS PE=5 SV=2 - [YFAS_ECOLI]							-0.497234	0.110528	-0.0617311	-0.0347547	0.013985
P69228	baeR	Transcriptional regulatory protein BaeR OS=Escherichia coli (strain K12) GN=baeR PE=1 SV=1 - [BAER_ECOLI]	0.29183	0.0354579	-0.294545	0.0942233	-0.174036	-0.127043	-0.588723	0.0577003	0.0423859	0.0674993	-0.0918898
P0A940	bamA	Outer membrane protein assembly factor BamA OS=Escherichia coli (strain K12) GN=bamA PE=1 SV=1 - [BAMA_ECOLI]	0.0557135	-0.1118	-0.399164	-0.0212657	-0.298797	-0.156892	-0.511863	0.135245	0.0955207	0.120164	-0.0595958
P77774	bamB	Outer membrane protein assembly factor BamB OS=Escherichia coli (strain K12) GN=bamB PE=1 SV=1 - [BAMB_ECOLI]	0.0987714	-0.112299	-0.312318	0.0918813	-0.117182	-0.195343	-0.421806	0.0605607	0.060944	0.0723984	-0.125284
P0A903	bamC	Outer membrane protein assembly factor BamC OS=Escherichia coli (strain K12) GN=bamC PE=1 SV=1 - [BAMC_ECOLI]	0.196754	-0.112156	-0.403859	0.00241023	-0.163463	-0.181542	-0.537597	0.0737152	0.0587006	0.0869928	-0.0851943
P0AC02	bamD	Outer membrane protein assembly factor BamD OS=Escherichia coli (strain K12) GN=bamD PE=1 SV=1 - [BAMD_ECOLI]	0.179921	-0.180187	-0.354349	0.104627	-0.0505434	-0.185027	-0.421754	0.0832348	0.0425604	0.0916918	-0.0160644
P0A937	bamE	Outer membrane protein assembly factor BamE OS=Escherichia coli (strain K12) GN=bamE PE=1 SV=1 - [BAME_ECOLI]	0.0581868	-0.146006	-0.314223	-0.0319142	-0.199309	-0.202195	-0.300195	0.0831364	0.0519489	0.0588788	-0.0891771
P30843	basR	Transcriptional regulatory protein BasR OS=Escherichia coli (strain K12) GN=basR PE=1 SV=3 - [BASR_ECOLI]	0.201961						-0.212851	0.147792	0.0451183	0.0363776	-0.0602299
P0AE52	bcp	Putative peroxiredoxin bcp OS=Escherichia coli (strain K12) GN=bcp PE=1 SV=1 - [BCP_ECOLI]	0.190538	-0.058174	-0.272985	0.080628	-0.316214	-0.126558	-0.255232	0.139679	0.198405	0.171875	-0.0218121
P37653	bcsA	Cellulose synthase catalytic subunit [UDP-forming] OS=Escherichia coli (strain K12) GN=bcsA PE=1 SV=3 - [BCSA_ECOLI]	0.27508						-0.629658	0.144523	0.0267323	0.187565	-0.146988
P37652	bcsB	Cyclic di-GMP-binding protein OS=Escherichia coli (strain K12) GN=bcsB PE=1 SV=2 - [BCSB_ECOLI]		-0.0068392	-0.364387	0.0828135	-0.248476	-0.13332
P37657	bcsE	Protein BcsE homolog OS=Escherichia coli (strain K12) GN=bcsE PE=4 SV=1 - [BCSE_ECOLI]							-0.389363	0.0532436	0.240014	0.124963	-0.126568
P39334	bdcR	Uncharacterized HTH-type transcriptional regulator YjgJ OS=Escherichia coli (strain K12) GN=yjgJ PE=4 SV=2 - [YJGJ_ECOLI]	-0.00435691	-0.0280221	-0.183329	0.0451835	-0.342023	-0.145418
P66948	bepA	TPR repeat-containing protein YfgC OS=Escherichia coli (strain K12) GN=yfgC PE=4 SV=1 - [YFGC_ECOLI]	0.138444	-0.0307495	-0.379074	0.00348271	-0.0915063	-0.197792	-0.399862	0.252933	0.140936	0.177809	-0.0255016
P17444	betA	Choline dehydrogenase OS=Escherichia coli (strain K12) GN=betA PE=1 SV=1 - [BETA_ECOLI]		-0.0995129	-0.199869	0.0151375	-0.185613	-0.0799336
P17445	betB	Betaine aldehyde dehydrogenase OS=Escherichia coli (strain K12) GN=betB PE=1 SV=3 - [BETB_ECOLI]	-0.146138	-0.129957	-0.463023	-0.230338	-0.498089	-0.239717	-0.303679	0.0693582	0.0986804	-0.0273096	-0.103948
P17446	betI	HTH-type transcriptional regulator BetI OS=Escherichia coli (strain K12) GN=betI PE=3 SV=1 - [BETI_ECOLI]	0.0215308
P0ABD3	bfr	Bacterioferritin OS=Escherichia coli (strain K12) GN=bfr PE=1 SV=1 - [BFR_ECOLI]	0.684859	0.432711	-0.0202653	0.177476	-0.0872023	-0.0213083
Q46829	bglA	6-phospho-beta-glucosidase BglA OS=Escherichia coli (strain K12) GN=bglA PE=1 SV=2 - [BGLA_ECOLI]	0.319224	-0.0190318	-0.311759	0.127329	0.030194	-0.133995	-0.313172	0.224966	0.227289	0.246826	-0.0664096
P33363	bglX	Periplasmic beta-glucosidase OS=Escherichia coli (strain K12) GN=bglX PE=1 SV=2 - [BGLX_ECOLI]	-0.0769789	-0.115241	-0.325493	-0.0683922	-0.372627	-0.158323	-0.371317	0.156086	0.0928514	0.191264	-0.0426697
P12995	bioA	Adenosylmethionine-8-amino-7-oxononanoate aminotransferase OS=Escherichia coli (strain K12) GN=bioA PE=1 SV=2 - [BIOA_ECOLI]	0.0919022	-0.134594	-0.490857	0.138062	-0.000907888	-0.231316	-0.357302	0.00175244	0.222935	0.0105232	-0.04761
P12996	bioB	Biotin synthase OS=Escherichia coli (strain K12) GN=bioB PE=1 SV=2 - [BIOB_ECOLI]	-0.053588	1.0782	1.03323	1.55157	1.13253	1.00731
P13000	bioD1	ATP-dependent dethiobiotin synthetase BioD 1 OS=Escherichia coli (strain K12) GN=bioD1 PE=1 SV=3 - [BIOD1_ECOLI]	0.264949	-0.0463372	-0.335434	0.245948	0.0648172	-0.104868	-0.720448	-0.0631627	0.0684368	-0.0452278	-0.106824
P0A6E9	bioD2	ATP-dependent dethiobiotin synthetase BioD 2 OS=Escherichia coli (strain K12) GN=bioD2 PE=3 SV=1 - [BIOD2_ECOLI]	-0.0938552	-0.048473	-0.177158	0.0697928	-0.246073	0.0442177
P12998	bioF	8-amino-7-oxononanoate synthase OS=Escherichia coli (strain K12) GN=bioF PE=1 SV=1 - [BIOF_ECOLI]	-0.0557326	-0.0503385	-0.271754	0.121531	-0.0382931	-0.0999229
P13001	bioH	Pimelyl-[acyl-carrier protein] methyl ester esterase OS=Escherichia coli (strain K12) GN=bioH PE=1 SV=1 - [BIOH_ECOLI]	0.204554	-0.0918456	-0.4106	0.113968	0.00326966	-0.161008
P06709	birA	Bifunctional protein BirA OS=Escherichia coli (strain K12) GN=birA PE=1 SV=1 - [BIRA_ECOLI]	0.128951	-0.13468	-0.354016	0.0881657	0.0370227	-0.157289	-0.249192	0.241009	0.218332	0.389561	0.0541599
P20099	bisC	Biotin sulfoxide reductase OS=Escherichia coli (strain K12) GN=bisC PE=3 SV=3 - [BISC_ECOLI]	0.187254	-0.0934088	-0.270201	0.0863217	-0.137266	-0.0559053
P0A901	blc	Outer membrane lipoprotein blc OS=Escherichia coli (strain K12) GN=blc PE=1 SV=1 - [BLC_ECOLI]	0.208046	-0.051618	-0.335861	-0.125195	-0.152491	-0.227212	-0.356937	-0.0361933	-0.128417	-0.162565	-0.162341
P0ABE2	bolA	Protein BolA OS=Escherichia coli (strain K12) GN=bolA PE=1 SV=1 - [BOLA_ECOLI]	0.13356	0.0160132	-0.262848	-0.0192073	-0.292249	-0.14357	-0.340117	0.0796827	0.0208568	0.0789676	-0.0262943
P77330	borD	Lipoprotein bor homolog from lambdoid prophage DLP12 OS=Escherichia coli (strain K12) GN=borD PE=3 SV=1 - [BORD_ECOLI]		0.0879663	-0.146097	-0.0609728	-0.191063	-0.226962
P39297	bsmA	Lipoprotein BsmA OS=Escherichia coli (strain K12) GN=bsmA PE=2 SV=2 - [BSMA_ECOLI]	0.199066	-0.227461		0.0431941	-0.0730244	-0.266201
P06129	btuB	Vitamin B12 transporter BtuB OS=Escherichia coli (strain K12) GN=btuB PE=1 SV=2 - [BTUB_ECOLI]	0.0496025	-0.104449	-0.365678	0.121037	-0.136263	-0.0017593	-0.368469	0.267704	0.240237	0.2322	0.121317
P06610	btuE	Vitamin B12 transport periplasmic protein BtuE OS=Escherichia coli (strain K12) GN=btuE PE=3 SV=1 - [BTUE_ECOLI]	0.273011	-0.0215212	-0.268501	0.10419	-0.295686	-0.144318	-0.700033	0.0298439	-0.0648732	-0.0322844	-0.078112
P37028	btuF	Vitamin B12-binding protein OS=Escherichia coli (strain K12) GN=btuF PE=1 SV=2 - [BTUF_ECOLI]		-0.422216	-0.755688	-0.0334652	0.00774926	-0.402286
P0A9H5	btuR	Cob(I)yrinic acid a,c-diamide adenosyltransferase OS=Escherichia coli (strain K12) GN=btuR PE=3 SV=1 - [BTUR_ECOLI]	-0.0268352						-0.297347	0.147808	0.0840464	0.136826	0.0994513
Q2UVX4	C3	*CON* Complement C3 OS=Bos taurus GN=C3 PE=1 SV=2 - [CO3_BOVIN]		-0.552135	-0.0535198	0.099345	0.271625	-0.250988	-0.417209	0.243	0.295104	0.413783	-0.39993
P0A9H3	cadA	Lysine decarboxylase, inducible OS=Escherichia coli (strain K12) GN=cadA PE=1 SV=1 - [LDCI_ECOLI]							-0.324968	0.422538	0.244208	0.245736	-0.0832345
P60584	caiA	Crotonobetainyl-CoA dehydrogenase OS=Escherichia coli (strain K12) GN=caiA PE=1 SV=1 - [CAIA_ECOLI]	0.0823753
P31551	caiD	Carnitinyl-CoA dehydratase OS=Escherichia coli (strain K12) GN=caiD PE=1 SV=4 - [CAID_ECOLI]		-0.226995	-0.507486	-0.340085	-0.496054	-0.320892
P61517	can	Carbonic anhydrase 2 OS=Escherichia coli (strain K12) GN=can PE=1 SV=1 - [CAN_ECOLI]	0.105664	-0.124973	-0.358267	0.0114929	-0.143005	-0.182389	-0.450939	0.0172495	0.0741131	0.0300754	-0.165685
P0A6F1	carA	Carbamoyl-phosphate synthase small chain OS=Escherichia coli (strain K12) GN=carA PE=1 SV=1 - [CARA_ECOLI]	-0.511165	-0.213564	-0.309965	-0.305081	-0.50105	-0.0793956	-0.402257	0.173886	0.242069	0.184929	0.000624556
P00968	carB	Carbamoyl-phosphate synthase large chain OS=Escherichia coli (strain K12) GN=carB PE=1 SV=2 - [CARB_ECOLI]	-0.562034	-0.21512	-0.295298	-0.325083	-0.637059	-0.0663191	-0.322779	0.181638	0.257769	0.181418	-0.0218902
P36659	cbpA	Curved DNA-binding protein OS=Escherichia coli (strain K12) GN=cbpA PE=1 SV=2 - [CBPA_ECOLI]	0.331051	0.130222	-0.194206	-0.0475574	-0.300204	-0.0648889	-0.929292	0.133994	-0.0895974	-0.0413571	-0.383887
P31469	cbrC	UPF0167 protein CbrC OS=Escherichia coli (strain K12) GN=cbrC PE=2 SV=1 - [CBRC_ECOLI]							-0.21691	1.38317	1.69835	1.28554	-0.048573
P06961	cca	Multifunctional CCA protein OS=Escherichia coli (strain K12) GN=cca PE=1 SV=1 - [CCA_ECOLI]	0.141862	-0.00413527	0.0607921	0.0123754	-0.0830028	-0.114657	-0.423736	0.190154	0.161743	0.168521	-0.0988251
P0ABM5	ccmD	Heme exporter protein D OS=Escherichia coli (strain K12) GN=ccmD PE=1 SV=1 - [CCMD_ECOLI]	0.103473
P69490	ccmE	Cytochrome c-type biogenesis protein CcmE OS=Escherichia coli (strain K12) GN=ccmE PE=1 SV=1 - [CCME_ECOLI]	0.05647	-0.0680761	-0.264564	0.03003	-0.224465	-0.169347
P0ABM9	ccmH	Cytochrome c-type biogenesis protein CcmH OS=Escherichia coli (strain K12) GN=ccmH PE=1 SV=1 - [CCMH_ECOLI]		0.00520606	-0.226217	0.0799696	-0.146041	-0.111708
P0ABF6	cdd	Cytidine deaminase OS=Escherichia coli (strain K12) GN=cdd PE=1 SV=1 - [CDD_ECOLI]	0.07083	-0.00656986	-0.223935	0.0511485	-0.100679	-0.0126279	-0.461048	0.157184	0.139325	0.16095	-0.0514671
P06282	cdh	CDP-diacylglycerol pyrophosphatase OS=Escherichia coli (strain K12) GN=cdh PE=3 SV=1 - [CDH_ECOLI]	0.00818825	-0.0574598	-0.287416	-0.0204739	-0.245417	-0.11871	-0.138727	0.448828	0.401673	0.455702	-0.119493
P0AE60	cedA	Cell division activator CedA OS=Escherichia coli (strain K12) GN=cedA PE=1 SV=2 - [CEDA_ECOLI]	0.241856
P0A9H7	cfa	Cyclopropane-fatty-acyl-phospholipid synthase OS=Escherichia coli (strain K12) GN=cfa PE=1 SV=2 - [CFA_ECOLI]	0.0831456	-0.1094	-0.298553	-0.116054	-0.359179	-0.191835	-0.353028	0.159055	0.108012	0.0720499	-0.123162
P0AE63	chaB	Cation transport regulator ChaB OS=Escherichia coli (strain K12) GN=chaB PE=1 SV=1 - [CHAB_ECOLI]	0.347	0.344539	0.00427309	0.282877	-0.183816	0.0863513
P69791	chbA	N,N'-diacetylchitobiose-specific phosphotransferase enzyme IIA component OS=Escherichia coli (strain K12) GN=chbA PE=1 SV=1 - [PTQA_ECOLI]	-0.0442517
P69795	chbB	N,N'-diacetylchitobiose-specific phosphotransferase enzyme IIB component OS=Escherichia coli (strain K12) GN=chbB PE=1 SV=1 - [PTQB_ECOLI]	0.022312
P17411	chbF	6-phospho-beta-glucosidase OS=Escherichia coli (strain K12) GN=chbF PE=1 SV=4 - [CHBF_ECOLI]		-0.238033	-0.197846	0.105402	0.0966507	-0.202611
P37794	chbG	UPF0249 protein ChbG OS=Escherichia coli (strain K12) GN=chbG PE=2 SV=2 - [CHBG_ECOLI]	0.197356	-0.122154	-0.234924	-0.0500545	-0.299914	-0.122503	-0.173313	0.338145	0.320641	0.332703	0.166346
P07363	cheA	Chemotaxis protein CheA OS=Escherichia coli (strain K12) GN=cheA PE=1 SV=3 - [CHEA_ECOLI]	-0.437474
P07363-2	cheA	Isoform cheA(S) of Chemotaxis protein CheA OS=Escherichia coli (strain K12) GN=cheA - [CHEA_ECOLI]		-0.372159	-0.571252	-0.456654	-0.759223	0.102076
P07330	cheB	Chemotaxis response regulator protein-glutamate methylesterase OS=Escherichia coli (strain K12) GN=cheB PE=1 SV=3 - [CHEB_ECOLI]	-0.486596	-0.50014	-0.505566	-0.514148	-0.850606	0.115823
P0A964	cheW	Chemotaxis protein CheW OS=Escherichia coli (strain K12) GN=cheW PE=1 SV=1 - [CHEW_ECOLI]	-0.843018	-0.399592	-0.385197	-0.413033	-0.415978	0.00911094	-0.231886	0.32067	0.589495	0.799922	0.9923
P0AE67	cheY	Chemotaxis protein CheY OS=Escherichia coli (strain K12) GN=cheY PE=1 SV=2 - [CHEY_ECOLI]	-0.463914	-0.32938	-0.283944	-0.394342	-0.482	0.118753	0.432276	0.246932	0.475252	0.71515	0.974371
P0A9H9	cheZ	Protein phosphatase CheZ OS=Escherichia coli (strain K12) GN=cheZ PE=1 SV=1 - [CHEZ_ECOLI]	-0.719681	-0.229296	-0.157708	-0.344867	-0.888799	0.0794303	0.222854	0.230472	0.296537	0.327232	0.604886
P13656	chiA	Probable bifunctional chitinase/lysozyme OS=Escherichia coli (strain K12) GN=chiA PE=1 SV=2 - [CHIA_ECOLI]		-0.146618	-0.376612	-0.127537	-0.350166	-0.189268
P17315	cirA	Colicin I receptor OS=Escherichia coli (strain K12) GN=cirA PE=1 SV=2 - [CIRA_ECOLI]	-0.440867	-0.969232	-1.07365	-0.753032	-1.21893	-0.972687	-0.157539	-0.031226	0.0924649	0.0369709	0.113243
P0A6G5	citX	Apo-citrate lyase phosphoribosyl-dephospho-CoA transferase OS=Escherichia coli (strain K12) GN=citX PE=2 SV=1 - [CITX_ECOLI]				0.0903313	-0.071165	-0.456066
P37019	clcA	H(+)/Cl(-) exchange transporter ClcA OS=Escherichia coli (strain K12) GN=clcA PE=1 SV=2 - [CLCA_ECOLI]		-0.202644	-0.558163	-0.296647	-0.579358	-0.299386
[truncated: 2,143 more rows]

## Sheet: Z-score
S6 Table. Global proteome quantification by TMT LC-MS/MS
[truncated: 2,336 more rows]
